# Supplementary material for: Proteomic Analysis of Plasma Membrane Proteins of Antler Stem Cells Using Label-Free LC–MS/MS
Source: MDPI journal article supplement (doi:10.3390/ijms19113477), 2018-11-05
Supplement: s1 [file s1]

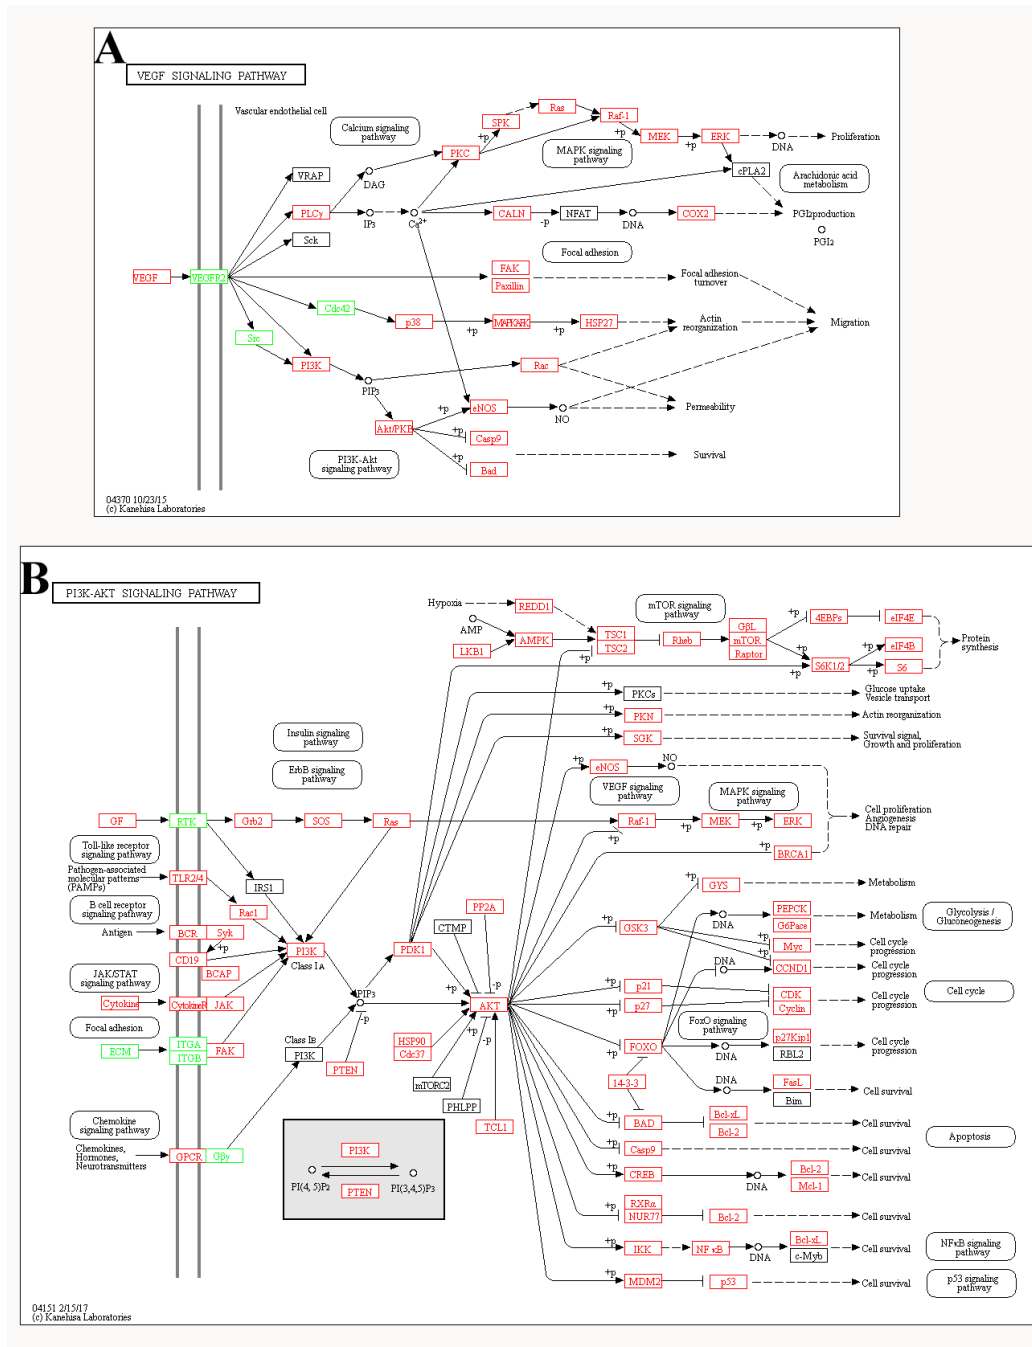

**Figure S1.** DEPs in VEGF signaling pathway (A) and PI3K-AKT signaling pathway (B). Block in green: DEPs; in red: gene detected in transcriptome of PPCs.

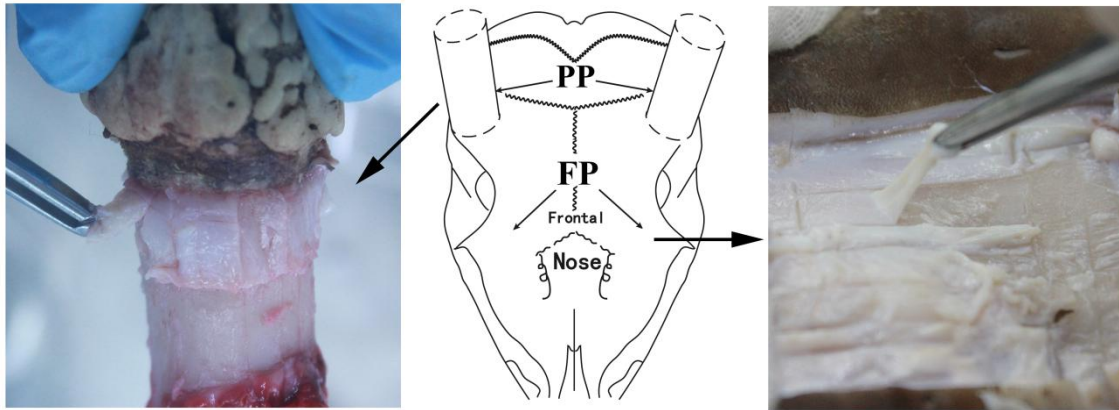

**Figure S2.** Illustration of tissue location. PP: pedicle periosteum, the tissue which gives rise to regenerating antlers. FP: facial periosteum, the tissue that is nearby the PP but does not have capacity to regenerate antler;
