# Supplementary material for: Proteomic Analysis of Plasma Membrane Proteins of Antler Stem Cells Using Label-Free LC–MS/MS
Source: Int J Mol Sci. 2018 Nov 5;19(11):3477. doi: 10.3390/ijms19113477 (PMC6275008; doi:10.3390/ijms19113477)
Supplement: Supplementary file 1 [file ijms-19-03477-s001.zip › supplementary S1.xlsx]

## Sheet: FPC vs PPC
Protein IDs	Fasta headers	Proteins	Peptides	Razor + unique peptides	Unique peptides	Sequence coverage [%]	Mol. weight [kDa]	PEP	LFQ intensity FP1_3	LFQ intensity FP2_2	LFQ intensity FP3_2	Average FPC	LFQ intensity PP1_2	LFQ intensity PP2_1	LFQ intensity PP3_4	Average PPC	PPC/FPC	t test p value
W5Q7S8	>tr|W5Q7S8|W5Q7S8_SHEEP Neuropilin OS=Ovis aries GN=NRP1 PE=3 SV=1	1	10	1	1	16.5	102.89	3.31e-59	16958000	20578000	19202000	1.89127e+07	2336800	6230900		4283850	0.226507	0.00520417
W5QDG7;W5QDG8;Q95KV5;Q95KV4;Q71U44;Q862C9;Q9MZ31;B7TJ06;Q5I237	>tr|W5QDG7|W5QDG7_SHEEP Uncharacterized protein OS=Ovis aries GN=FN1 PE=4 SV=1;>tr|W5QDG8|W5QDG8_SHEEP Uncharacterized protein OS=Ovis aries GN=FN1 PE=4 SV=1	9	51	3	2	27.7	272.04	0	90653000	84383000	120630000	9.85553e+07	23012000	27837000	42330000	3.10597e+07	0.31515	0.00586112
W5PIP7;Q0P5D5;L8IDC0	>tr|W5PIP7|W5PIP7_SHEEP Uncharacterized protein OS=Ovis aries PE=4 SV=1;>tr|Q0P5D5|Q0P5D5_BOVIN Lipoma HMGIC fusion partner OS=Bos taurus GN=LHFP PE=2 SV=1;>tr|L8IDC0|L8IDC0_9CETA Lipoma HMGIC fusion partner OS=Bos mutus GN=M91_10073 PE=4 SV=1	3	1	1	1	3.1	35.311	0.00076844	4606600	6296700	5170700	5358000	2964600	2159800	2061500	2395300	0.447051	0.0066608
E1B9R3;L8HSC3	>tr|E1B9R3|E1B9R3_BOVIN Uncharacterized protein OS=Bos taurus GN=UGGT1 PE=4 SV=2;>tr|L8HSC3|L8HSC3_9CETA UDP-glucose:glycoprotein glucosyltransferase 1 (Fragment) OS=Bos mutus GN=M91_20505 PE=4 SV=1	2	20	20	8	17.8	177.69	5.64e-120	116200000	97757000	136710000	116889000	39743000	56960000	61771000	5.28247e+07	0.451922	0.00807184
A5D9D3;Q3SYT8;W5PVE3	>tr|A5D9D3|A5D9D3_BOVIN NADPH--cytochrome P450 reductase OS=Bos taurus GN=POR PE=2 SV=1;>sp|Q3SYT8|NCPR_BOVIN NADPH--cytochrome P450 reductase OS=Bos taurus GN=POR PE=2 SV=3;>tr|W5PVE3|W5PVE3_SHEEP Uncharacterized protein OS=Ovis aries GN=POR PE=4 SV=1	3	15	15	15	25.1	77.266	1.85e-121	218430000	223210000	318650000	253430000	97609000	101610000	91381000	9.68667e+07	0.382223	0.008795
L8I2V2;E1BG26;W5QGS9;W5QGT0	>tr|L8I2V2|L8I2V2_9CETA Cation-transporting ATPase OS=Bos mutus GN=M91_13767 PE=3 SV=1;>tr|E1BG26|E1BG26_BOVIN Cation-transporting ATPase OS=Bos taurus GN=ATP13A3 PE=3 SV=2;>tr|W5QGS9|W5QGS9_SHEEP Cation-transporting ATPase OS=Ovis aries GN=ATP13A3 PE=3 SV	4	8	8	8	8.6	139.62	8.45e-161	90144000	126200000	97004000	1.04449e+08	48835000	48016000	56419000	51090000	0.489137	0.00936614
A5PKD6;L8IQ29;W5QHP5;REV__W5PGZ8;REV__L8I3W2;REV__Q17QH1	>tr|A5PKD6|A5PKD6_BOVIN GNB4 protein OS=Bos taurus GN=GNB4 PE=2 SV=1;>tr|L8IQ29|L8IQ29_9CETA Guanine nucleotide-binding protein subunit beta-4 OS=Bos mutus GN=M91_09229 PE=4 SV=1;>tr|W5QHP5|W5QHP5_SHEEP Uncharacterized protein OS=Ovis aries GN=GNB4 PE=4 SV	6	12	6	6	43.5	37.537	1.06e-183	224680000	160200000	230970000	2.05283e+08	46003000	94703000	96505000	7.90703e+07	0.385177	0.0107847
F8V2T3;A0A0H3U450;L8HX32;G1K218;G1FG63;W5PJW7;Q05688;I3PGL2;C9EEZ1;J7G3Y2;F1MV64;W5NQ38;W5NQ40;M1Q751;E2J5T6;Q8HY64;G8GZ67;O18855;M1RJ33;I6UW03;X4Y8Z9;Q0PZJ7;Q0PZP0;G5DBJ3;I6ZLE8;Q1RP91;S5M602	>tr|F8V2T3|F8V2T3_CERNI Tyrosine-protein kinase receptor OS=Cervus nippon PE=2 SV=1;>tr|A0A0H3U450|A0A0H3U450_BOSMU Tyrosine-protein kinase receptor OS=Bos mutus grunniens PE=2 SV=1;>tr|L8HX32|L8HX32_9CETA Tyrosine-protein kinase receptor OS=Bos mutus GN=M	27	14	14	14	12.2	154.82	2.91e-40	39387000	42225000	54133000	4.52483e+07	9864400	19163000	25418000	1.81485e+07	0.401086	0.0132478
W5QGI0;W5QGI1;A0JNE9;L8HZK1	>tr|W5QGI0|W5QGI0_SHEEP CTP synthase OS=Ovis aries GN=CTPS1 PE=3 SV=1;>tr|W5QGI1|W5QGI1_SHEEP CTP synthase OS=Ovis aries GN=CTPS1 PE=3 SV=1;>tr|A0JNE9|A0JNE9_BOVIN CTP synthase OS=Bos taurus GN=CTPS PE=2 SV=1;>tr|L8HZK1|L8HZK1_9CETA CTP synthase OS=Bos mut	4	7	7	6	13.1	68.795	1.6e-29	65033000	97977000	58990000	74000000	20863000	23429000	27689000	2.39937e+07	0.324239	0.0151842
W5Q4T5;L8IBG7;A2VDY0	>tr|W5Q4T5|W5Q4T5_SHEEP Uncharacterized protein OS=Ovis aries GN=CTHRC1 PE=4 SV=1;>tr|L8IBG7|L8IBG7_9CETA Collagen triple helix repeat-containing protein 1 (Fragment) OS=Bos mutus GN=M91_04016 PE=4 SV=1;>tr|A2VDY0|A2VDY0_BOVIN Collagen triple helix repeat	3	6	6	6	32.1	26.222	3.34e-117	123510000	122830000	133800000	1.26713e+08	30502000	40872000	89382000	5.35853e+07	0.422886	0.0167497
W5P6M6	>tr|W5P6M6|W5P6M6_SHEEP Uncharacterized protein OS=Ovis aries GN=PTK7 PE=3 SV=1	1	25	25	4	29.6	116.02	2.25e-136	513850000	727210000	770480000	6.70513e+08	190310000	367530000	354190000	304010000	0.453399	0.0199017
L8IPU7;A6QR28	>tr|L8IPU7|L8IPU7_9CETA Phosphoserine aminotransferase (Fragment) OS=Bos mutus GN=M91_05531 PE=3 SV=1;>tr|A6QR28|A6QR28_BOVIN Phosphoserine aminotransferase OS=Bos taurus GN=PSAT1 PE=1 SV=1	2	9	9	2	23.3	42.638	3.42e-24	104110000	155310000	93928000	1.17783e+08	34505000	62721000	31687000	42971000	0.364833	0.02507
A1Z1U5;A1Z1V0;A7UAC2;P40242;Q5UJG3;Q5UJG5;A0A142BZ63;A0SWW3;A1Z1U6;A1Z1V1;A7UA97;A7UAA8;A7UAB2;A7UAB5;A9QH40;O62670;P40243;P67986;P67987;Q549D4;Q6DN38;Q7YSF3;O97695;O97698;Q5UJI1;A1Z1U4;A7UAB1;A3QUK2;H9NAW5;Q072J4;O77787;Q0ZAQ2;O97629;Q9TSI7;Q9TSI8;O97908;Q6RVI2;Q6RVI3;Q6RVI4;Q6RVI5;Q6RVI6;Q6RYR6;E7CV27;E7CV28;E7CV29;E7CV30;E7CV32;E7CV33;E7CV34;E7CV35;E7CV38;E7CV43;E7CV44;O97694;O97911;A5LID2;A9C…	>tr|A1Z1U5|A1Z1U5_TRAOR Major prion protein OS=Tragelaphus oryx GN=PRNP PE=3 SV=1;>tr|A1Z1V0|A1Z1V0_KOBEL Major prion protein OS=Kobus ellipsiprymnus defassa GN=PRNP PE=3 SV=1;>tr|A7UAC2|A7UAC2_KOBEL Major prion protein OS=Kobus ellipsiprymnus PE=3 SV=1;>s	136	3	3	1	9.5	28.66	2.92e-07	204900000	140490000	154190000	1.66527e+08	92336000	51803000	103700000	82613000	0.496095	0.028881
L8IRP2;W5QGD1;A0FH35;G0Z2N0;G0Z2N1;G0Z2N2;Q5E9B1;B0JYN3;A0FH34;K0IT60;L8IQ43;B3F3L0;H9T8J0;H9T8J3;B3F3L2;H9T8J4;H9T8J6;Q862D4;Q7YS14	>tr|L8IRP2|L8IRP2_9CETA L-lactate dehydrogenase OS=Bos mutus GN=M91_09527 PE=3 SV=1;>tr|W5QGD1|W5QGD1_SHEEP L-lactate dehydrogenase OS=Ovis aries GN=LDHB PE=3 SV=1;>tr|A0FH35|A0FH35_BOSMU L-lactate dehydrogenase OS=Bos mutus grunniens PE=2 SV=1;>tr|G0Z2N0|	19	9	7	7	29.9	37.161	1.1e-45	278680000	246980000	150360000	225340000	97682000	96821000	107430000	1.00644e+08	0.446633	0.0323187
L8HPB0;W5PSW8;F1MRM8;Q2YDG0;F2Y8B8;F2Y8B9;F2Y8C5	>tr|L8HPB0|L8HPB0_9CETA G-protein coupled receptor family C group 5 member C (Fragment) OS=Bos mutus GN=M91_02413 PE=4 SV=1;>tr|W5PSW8|W5PSW8_SHEEP Uncharacterized protein OS=Ovis aries GN=GPRC5C PE=4 SV=1;>tr|F1MRM8|F1MRM8_BOVIN G-protein-coupled receptor	7	1	1	1	3.3	49.539	3.23e-33		12462000	15369000	13915500		6327400	5674100	6000750	0.431228	0.0336505
E1BMX5;L8IVE5;Q95JF3	>tr|E1BMX5|E1BMX5_BOVIN Neuropilin OS=Bos taurus GN=NRP1 PE=3 SV=1;>tr|L8IVE5|L8IVE5_9CETA Neuropilin-1 (Fragment) OS=Bos mutus GN=M91_04362 PE=4 SV=1	3	11	11	2	17.2	103.28	5.39e-79	88417000	199630000	168420000	1.52156e+08	37346000	62282000	29199000	4.29423e+07	0.282226	0.0342443
B8Y9S9;G5E5A9;P07589;B8Y9T0;Q865Z7	>tr|B8Y9S9|B8Y9S9_BOVIN Embryo-specific fibronectin 1 transcript variant OS=Bos taurus GN=FN1 PE=1 SV=1;>tr|G5E5A9|G5E5A9_BOVIN Fibronectin OS=Bos taurus GN=FN1 PE=1 SV=1;>sp|P07589|FINC_BOVIN Fibronectin OS=Bos taurus GN=FN1 PE=1 SV=4;>tr|B8Y9T0|B8Y9T0_BO	5	53	53	2	30.2	262.42	0	784610000	710660000	1350900000	9.48723e+08	311810000	224870000	370110000	3.02263e+08	0.3186	0.0352045
W5PJG7	>tr|W5PJG7|W5PJG7_SHEEP Uncharacterized protein OS=Ovis aries GN=CALR PE=3 SV=1	1	16	16	1	55.4	48.058	0	2403100000	1899500000	2975300000	2.42597e+09	745490000	1173900000	1615500000	1.1783e+09	0.485702	0.0354403
A6QLT9;L8IPC0;W5P5H4;A0A2Q9	>tr|A6QLT9|A6QLT9_BOVIN AARS protein OS=Bos taurus GN=AARS PE=1 SV=1;>tr|L8IPC0|L8IPC0_9CETA Alanyl-tRNA synthetase, cytoplasmic OS=Bos mutus GN=AARS PE=3 SV=1;>tr|W5P5H4|W5P5H4_SHEEP Uncharacterized protein OS=Ovis aries GN=AARS PE=3 SV=1;>tr|A0A2Q9|A0A2Q	4	15	15	15	20.8	106.65	2.29e-98	320390000	503370000	284520000	3.69427e+08	82597000	175770000	161400000	1.39922e+08	0.378755	0.0357271
W5QD08;L8IQE7;F1MD77	>tr|W5QD08|W5QD08_SHEEP Uncharacterized protein OS=Ovis aries GN=LAMC1 PE=4 SV=1;>tr|L8IQE7|L8IQE7_9CETA Laminin subunit gamma-1 (Fragment) OS=Bos mutus GN=M91_14901 PE=4 SV=1	3	7	7	7	5.8	177.95	1.88e-38	68603000	58179000	36213000	5.43317e+07	11816000		6874900	9345450	0.172007	0.0364971
G3X6N3;A0A0M4PKG1;A3QPC1;A5HLY3;B3VTM3;B6ZCR1;B9VPZ5;D0VAV0;D3G9G3;G1CW23;G9DAR3;J7K1V4;O77698;P24627;Q29477;Q5MJE8;R9QXS6;W5PFP1;C7FE01;Q6LBN7;Q8MII0;O18780;C6K2K5;A0A0M3U1E2;A0A0M4P4G7;A0A0M4P8V1;A0A0M4PJG6;A0A0M4PKG9;A0A0M4PXY5;A0A0M4Q8T0;A0A0M4Q8T7;A0A0M4QAG2;A0A0M5LKL0;A0A0M5LKW5;A0A0M5LRH7;A3QPC0;B2CS79;B2CS80;G1CW25;L8IBY3;A0A0M4PJH3;A0A0M4QAF0;E1BI82;Q2HJF0;A0A0M4PFN0;Q99149;Q4U252	>tr|G3X6N3|G3X6N3_BOVIN Serotransferrin OS=Bos taurus GN=TF PE=1 SV=1	47	24	24	1	43	77.665	4.56e-287	364010000	285600000	391720000	347110000	238130000	148180000	20790000	135700000	0.390942	0.0401701
L8IQX0;A5PJA8;A7YWQ2;W5QF74	>tr|L8IQX0|L8IQX0_9CETA Uncharacterized protein (Fragment) OS=Bos mutus GN=M91_16488 PE=4 SV=1;>sp|A5PJA8|EMC7_BOVIN ER membrane protein complex subunit 7 OS=Bos taurus GN=EMC7 PE=2 SV=1;>tr|A7YWQ2|A7YWQ2_BOVIN Chromosome 15 open reading frame 24 ortholog	4	4	4	4	19	27.092	1.21e-09	33036000	21331000	37495000	3.06207e+07	10534000	15415000	18349000	14766000	0.482223	0.0409936
L8I133;W5P9Z9;B7U170;N0E640;P67868;N0E6I4;N0E4A8;N0E630;G1DFQ6;N0E660;N0E667;N0E6J6;N0E6I3	>tr|L8I133|L8I133_9CETA Casein kinase II subunit beta OS=Bos mutus GN=M91_10762 PE=3 SV=1;>tr|W5P9Z9|W5P9Z9_SHEEP Casein kinase II subunit beta OS=Ovis aries GN=CSNK2B PE=3 SV=1;>tr|B7U170|B7U170_SHEEP Casein kinase II subunit beta OS=Ovis aries GN=CSNK2B	13	4	4	4	20.9	27.013	4.32e-38	92145000	69070000	41331000	6.75153e+07	23540000	25081000	24155000	2.42587e+07	0.359306	0.0422458
W5PS11	>tr|W5PS11|W5PS11_SHEEP Phosphoserine aminotransferase OS=Ovis aries GN=PSAT1 PE=3 SV=1	1	8	1	1	21	43.261	3.69e-21	66209000	88924000	62059000	7.23973e+07	25336000	38709000		32022500	0.442316	0.042469
G3MZI7;L8II18	>tr|G3MZI7|G3MZI7_BOVIN Uncharacterized protein OS=Bos taurus GN=COL5A1 PE=4 SV=1	2	25	2	1	18.1	199.44	0	37605000	45181000	50303000	44363000	4634500	11691000	33733000	1.66862e+07	0.376128	0.0436388
W5Q1H5	>tr|W5Q1H5|W5Q1H5_SHEEP Uncharacterized protein OS=Ovis aries GN=RFTN1 PE=4 SV=1	1	7	7	7	14.9	60.383	2.95e-23	154450000	180570000	107740000	1.47587e+08		62774000	42292000	52533000	0.355947	0.044705
W5PES1;L8I6Y9;A7MBC5	>tr|W5PES1|W5PES1_SHEEP Uncharacterized protein OS=Ovis aries GN=IARS PE=3 SV=1;>tr|L8I6Y9|L8I6Y9_9CETA Isoleucyl-tRNA synthetase, cytoplasmic (Fragment) OS=Bos mutus GN=M91_09016 PE=3 SV=1;>tr|A7MBC5|A7MBC5_BOVIN IARS protein OS=Bos taurus GN=IARS PE=2 SV	3	24	24	24	20.9	144.83	1.52e-103	279330000	279360000	143570000	2.34087e+08	122140000	105600000	59582000	95774000	0.409139	0.0476279
L8IEM4;P13213;W5PGY0;A9LLG1;C8BKD5;F4YD32	>tr|L8IEM4|L8IEM4_9CETA SPARC protein OS=Bos mutus GN=M91_20717 PE=4 SV=1;>sp|P13213|SPRC_BOVIN SPARC OS=Bos taurus GN=SPARC PE=1 SV=2;>tr|W5PGY0|W5PGY0_SHEEP Uncharacterized protein OS=Ovis aries PE=4 SV=1;>tr|A9LLG1|A9LLG1_CAPHI Osteonectin OS=Capra hirc	6	12	12	12	47.5	34.613	1e-99	520340000	1252400000	860610000	8.77783e+08	256460000	282610000	305430000	281500000	0.320694	0.0481699
P18246;W5QFD5;L8IWP2;Q8SQA9;Q9GJY1	>sp|P18246|CXA1_BOVIN Gap junction alpha-1 protein OS=Bos taurus GN=GJA1 PE=2 SV=2;>tr|W5QFD5|W5QFD5_SHEEP Gap junction protein OS=Ovis aries GN=GJA1 PE=3 SV=1;>tr|L8IWP2|L8IWP2_9CETA Gap junction protein OS=Bos mutus GN=M91_18979 PE=3 SV=1	5	13	13	2	47.8	43.187	2.78e-237	1096000000	1543600000	1932000000	1.52387e+09	538530000	994320000	731870000	7.54907e+08	0.495389	0.0491465
Q08DC2;L8IBC0;W5NSZ7;G3MZN2	>tr|Q08DC2|Q08DC2_BOVIN RAB31, member RAS oncogene family OS=Bos taurus GN=RAB31 PE=2 SV=1;>tr|L8IBC0|L8IBC0_9CETA Ras-related protein Rab-31 (Fragment) OS=Bos mutus GN=M91_17972 PE=4 SV=1;>tr|W5NSZ7|W5NSZ7_SHEEP Uncharacterized protein OS=Ovis aries GN=RA	4	7	7	5	51.8	21.515	1.71e-81	171010000	143590000	167420000	1.60673e+08	80660000	83768000	81994000	8.21407e+07	0.511228	0.000816441
F1MDW1;L8I7H6;Q2T9L8;W5P929	>tr|F1MDW1|F1MDW1_BOVIN Methionine--tRNA ligase, cytoplasmic OS=Bos taurus GN=MARS PE=3 SV=1;>tr|L8I7H6|L8I7H6_9CETA Methionyl-tRNA synthetase, cytoplasmic OS=Bos mutus GN=M91_11211 PE=3 SV=1;>sp|Q2T9L8|SYMC_BOVIN Methionine--tRNA ligase, cytoplasmic OS=Bo	4	5	5	5	6.9	100.63	6.9e-13	24012000	23351000		23681500	17685000	17215000		17450000	0.736862	0.00420837
W5PV42;W5PV43	>tr|W5PV42|W5PV42_SHEEP Uncharacterized protein OS=Ovis aries GN=LRPAP1 PE=4 SV=1;>tr|W5PV43|W5PV43_SHEEP Uncharacterized protein OS=Ovis aries GN=LRPAP1 PE=4 SV=1	2	5	5	1	13.8	39.541	6.22e-42	280470000	218380000	240260000	246370000	144140000	136140000	121980000	1.34087e+08	0.544249	0.00434765
A2VDW4;L8IVS8;W5Q045	>tr|A2VDW4|A2VDW4_BOVIN Transmembrane emp24 protein transport domain containing 3 OS=Bos taurus GN=TMED3 PE=2 SV=1;>tr|L8IVS8|L8IVS8_9CETA Transmembrane emp24 domain-containing protein 3 OS=Bos mutus GN=M91_07030 PE=3 SV=1;>tr|W5Q045|W5Q045_SHEEP Uncharact	3	4	4	4	21.1	24.8	2.41e-26	40881000	42497000	51194000	4.48573e+07	29608000	31849000	33460000	31639000	0.705325	0.0175818
L8HT28;Q3ZC48;W5QDW0	>tr|L8HT28|L8HT28_9CETA DNA damage-regulated autophagy modulator protein 2 OS=Bos mutus GN=M91_18708 PE=4 SV=1;>sp|Q3ZC48|DRAM2_BOVIN DNA damage-regulated autophagy modulator protein 2 OS=Bos taurus GN=DRAM2 PE=2 SV=1;>tr|W5QDW0|W5QDW0_SHEEP Uncharacterize	3	1	1	1	8.3	29.909	3.26e-12	13004000		14784000	13894000	7341800	7224600		7283200	0.524197	0.0177209
W5PIG5	>tr|W5PIG5|W5PIG5_SHEEP Uncharacterized protein OS=Ovis aries GN=ABCC1 PE=4 SV=1	1	17	3	3	13.6	170.61	7.22e-63	17923000	21788000	26712000	22141000	9068700	13371000	11123000	1.11876e+07	0.505287	0.0179973
P12624;F1N2N5;E1B916;W5PIF5	>sp|P12624|MARCS_BOVIN Myristoylated alanine-rich C-kinase substrate OS=Bos taurus GN=MARCKS PE=1 SV=6;>tr|F1N2N5|F1N2N5_BOVIN Myristoylated alanine-rich C-kinase substrate OS=Bos taurus GN=MARCKS PE=1 SV=1;>tr|E1B916|E1B916_BOVIN Myristoylated alanine-ric	4	13	13	13	51.4	31.664	0	1037000000	899240000	810860000	915700000	445080000	693780000	423860000	5.20907e+08	0.568862	0.0221893
L8I543;E1BI98;E3VLN2	>tr|L8I543|L8I543_9CETA Collagen alpha-1(VI) chain OS=Bos mutus GN=M91_02730 PE=4 SV=1;>tr|E1BI98|E1BI98_BOVIN Uncharacterized protein OS=Bos taurus GN=COL6A1 PE=1 SV=1;>tr|E3VLN2|E3VLN2_BUBBU Collagen type VI alpha 1 protein OS=Bubalus bubalis GN=COL6A1 P	3	22	22	4	30.2	108.06	0	526160000	525600000	533520000	5.28427e+08	407420000	394020000	252140000	3.51193e+08	0.664602	0.0235231
L8I870;A0A0A8J2N9;F1MTV5;Q95JC7;W5PM91;A0A089FVK4;C7BDV9	>tr|L8I870|L8I870_9CETA Amino acid transporter (Fragment) OS=Bos mutus GN=M91_02215 PE=3 SV=1;>tr|A0A0A8J2N9|A0A0A8J2N9_BOVIN Amino acid transporter OS=Bos taurus GN=ASCT2 PE=2 SV=1;>tr|F1MTV5|F1MTV5_BOVIN Amino acid transporter OS=Bos taurus GN=SLC1A5 PE=	7	5	5	5	10.1	57.044	6.7e-27	644020000	862900000	867320000	7.91413e+08	401770000	560300000	503190000	488420000	0.617149	0.0253573
A5PJI5;L8I9M3;W5PP30	>sp|A5PJI5|ASNA_BOVIN ATPase ASNA1 OS=Bos taurus GN=ASNA1 PE=2 SV=1;>tr|L8I9M3|L8I9M3_9CETA ATPase ASNA1 OS=Bos mutus GN=ASNA1 PE=3 SV=1;>tr|W5PP30|W5PP30_SHEEP ATPase ASNA1 OS=Ovis aries GN=ASNA1 PE=3 SV=1	3	5	5	5	18.7	38.792	2.41e-18	44054000	51727000	44258000	4.66797e+07	35781000	30213000	38282000	3.47587e+07	0.744621	0.0264673
A0A051	>tr|A0A051|A0A051_BISBI MHC class I alpha chain (Fragment) OS=Bison bison GN=Bibi-N PE=2 SV=1	1	6	1	0	22.2	40.129	9.82e-66	19040000	18535000	27027000	21534000	10675000	8974300	13623000	1.10908e+07	0.515035	0.0271608
Q9TU26;W5PRD2;L8IRW1;Q8HY66;A7Y463	>tr|Q9TU26|Q9TU26_BOVIN Blood-brain barrier large neutral amino acid transporter OS=Bos taurus GN=LAT PE=2 SV=1;>tr|W5PRD2|W5PRD2_SHEEP Uncharacterized protein OS=Ovis aries GN=SLC7A5 PE=4 SV=1;>tr|L8IRW1|L8IRW1_9CETA Large neutral amino acids transporter	5	4	4	4	8.5	55.11	2.2e-23	72886000	97166000	107940000	92664000	52031000	62290000	37011000	50444000	0.544375	0.029274
B2LYL2;Q2YDM1;W5Q058;L8IDN0	>tr|B2LYL2|B2LYL2_SHEEP ADP-ribosylation factor-like 1 OS=Ovis aries GN=ARL1 PE=2 SV=1;>sp|Q2YDM1|ARL1_BOVIN ADP-ribosylation factor-like protein 1 OS=Bos taurus GN=ARL1 PE=2 SV=1;>tr|W5Q058|W5Q058_SHEEP Uncharacterized protein OS=Ovis aries GN=ARL1 PE=3 S	4	3	3	3	19.9	20.393	3.84e-128	48460000	52674000	37923000	4.63523e+07	31031000	23830000	32875000	2.92453e+07	0.630936	0.0299073
W5P2A5;G1K1S1;B0JYQ9;A6QQT9;L8I3W8	>tr|W5P2A5|W5P2A5_SHEEP Uncharacterized protein OS=Ovis aries GN=ILVBL PE=3 SV=1;>tr|G1K1S1|G1K1S1_BOVIN Acetolactate synthase-like protein OS=Bos taurus GN=ILVBL PE=3 SV=1;>tr|B0JYQ9|B0JYQ9_BOVIN ILVBL protein (Fragment) OS=Bos taurus GN=ILVBL PE=2 SV=1;>	5	7	7	7	18.6	68.449	2.5e-51	39289000	29333000	28989000	32537000	19091000	24304000	16784000	2.00597e+07	0.616519	0.0367398
G3N2F2;L8J2E8;F1MJQ4;W5Q1C9;Q3SYY3	>tr|G3N2F2|G3N2F2_BOVIN Uncharacterized protein OS=Bos taurus GN=P4HA2 PE=4 SV=1;>tr|L8J2E8|L8J2E8_9CETA Prolyl 4-hydroxylase subunit alpha-2 (Fragment) OS=Bos mutus GN=M91_18686 PE=4 SV=1;>tr|F1MJQ4|F1MJQ4_BOVIN Uncharacterized protein OS=Bos taurus GN=P4	5	19	19	19	39.1	60.971	2.66e-223	584360000	514990000	603790000	5.67713e+08	167790000	317460000	444870000	310040000	0.546121	0.0380326
W5PRJ4;G3X757;Q3ZBT1;L8IC82	>tr|W5PRJ4|W5PRJ4_SHEEP Uncharacterized protein OS=Ovis aries GN=VCP PE=3 SV=1;>tr|G3X757|G3X757_BOVIN Transitional endoplasmic reticulum ATPase OS=Bos taurus GN=VCP PE=3 SV=1;>sp|Q3ZBT1|TERA_BOVIN Transitional endoplasmic reticulum ATPase OS=Bos taurus GN	4	30	30	30	54.4	89.932	0	912500000	1107900000	766880000	9.29093e+08	670320000	617120000	518370000	6.01937e+08	0.647875	0.0391947
C5IWU7;G1DG27;L8HT07;A0JN37;F1MBM4;W5PLJ8	>tr|C5IWU7|C5IWU7_SHEEP ADP-ribosylation factor-like 6 interacting protein 1 OS=Ovis aries GN=ARL6IP1 PE=2 SV=1;>tr|G1DG27|G1DG27_CAPHI ADP-ribosylation factor-like protein 6-interacting protein 1 OS=Capra hircus GN=ARL6IP1 PE=2 SV=1;>tr|L8HT07|L8HT07_9CET	6	2	2	2	8.9	23.413	2.64e-05	40543000	48533000	55712000	4.82627e+07	33901000	36236000	35248000	3.51283e+07	0.727857	0.0414356
L8HTM4;W5PLE9;B2LYK8;P81623	>tr|L8HTM4|L8HTM4_9CETA Endoplasmic reticulum resident protein 29 (Fragment) OS=Bos mutus GN=M91_04403 PE=4 SV=1;>tr|W5PLE9|W5PLE9_SHEEP Uncharacterized protein OS=Ovis aries GN=ERP29 PE=4 SV=1;>tr|B2LYK8|B2LYK8_SHEEP Endoplasmic reticulum protein 29 OS=Ov	4	5	5	5	25.8	29.052	4.36e-21	43990000	39826000	39200000	4.10053e+07	35806000	23230000	29188000	29408000	0.717175	0.0419548
L8HXP6;Q2NKY9;W5P761	>tr|L8HXP6|L8HXP6_9CETA Protein jagunal-like protein 1 OS=Bos mutus GN=M91_07185 PE=4 SV=1;>sp|Q2NKY9|JAGN1_BOVIN Protein jagunal homolog 1 OS=Bos taurus GN=JAGN1 PE=2 SV=1;>tr|W5P761|W5P761_SHEEP Uncharacterized protein OS=Ovis aries GN=JAGN1 PE=4 SV=1	3	2	2	2	13.1	21.102	1.25e-07	22484000	18579000	24014000	2.16923e+07	15505000	17699000	17083000	1.67623e+07	0.772731	0.0475778
F1MTX9;L8I491;W5QE07	>tr|F1MTX9|F1MTX9_BOVIN Uncharacterized protein OS=Bos taurus GN=SLC38A1 PE=4 SV=2;>tr|L8I491|L8I491_9CETA Sodium-coupled neutral amino acid transporter 1 OS=Bos mutus GN=M91_02051 PE=4 SV=1;>tr|W5QE07|W5QE07_SHEEP Uncharacterized protein OS=Ovis aries GN=	3	2	2	2	3.9	54.019	1.56e-06	23161000	14377000	26160000	2.12327e+07	9550100	12874000	10486000	1.097e+07	0.516658	0.0490445
L8I3I5;W5PNE4;E3W9A2	>tr|L8I3I5|L8I3I5_9CETA CAP-Gly domain-containing linker protein 1 OS=Bos mutus GN=M91_06144 PE=4 SV=1;>tr|W5PNE4|W5PNE4_SHEEP Uncharacterized protein OS=Ovis aries GN=CLIP1 PE=4 SV=1;>tr|E3W9A2|E3W9A2_BOVIN Uncharacterized protein OS=Bos taurus GN=CLIP1 P	3	2	2	1	2	161.89	4.85e-10	1933600	3266400	3426600	2.87553e+06	8127500	7035100		7581300	2.63648	0.00769388
A5PKJ7;L8IL92;W5PHI3	>tr|A5PKJ7|A5PKJ7_BOVIN RND3 protein OS=Bos taurus GN=RND3 PE=2 SV=1;>tr|L8IL92|L8IL92_9CETA Rho-related GTP-binding protein RhoE OS=Bos mutus GN=M91_13330 PE=4 SV=1;>tr|W5PHI3|W5PHI3_SHEEP Uncharacterized protein OS=Ovis aries GN=RND3 PE=4 SV=1	3	3	3	3	18.4	27.368	1.11e-08	7602500	7585600		7594050	22518000	19711000		21114500	2.7804	0.0106049
A0A060IPQ9;B2MVX0;P32007;L8III0;W5PCT5;W5Q3M2;A0A060ILH6;F1MDK8;L8I2G5;Q2YDD9	>tr|A0A060IPQ9|A0A060IPQ9_9CETA ADP/ATP translocase 3 OS=Bos mutus GN=SLC25A6 PE=2 SV=1;>tr|B2MVX0|B2MVX0_SHEEP SLC25A6 OS=Ovis aries PE=2 SV=1;>sp|P32007|ADT3_BOVIN ADP/ATP translocase 3 OS=Bos taurus GN=SLC25A6 PE=1 SV=3;>tr|L8III0|L8III0_9CETA Uncharact	10	10	2	2	30.5	32.877	1.99e-29	65607000	44460000	41375000	5.04807e+07		115330000	149570000	132450000	2.62378	0.0146683
W5PLB8	>tr|W5PLB8|W5PLB8_SHEEP Uncharacterized protein OS=Ovis aries GN=EPB41L3 PE=4 SV=1	1	19	3	3	19.6	122.11	7.06e-95	36366000	36752000	31295000	3.48043e+07	61112000	75436000	96930000	77826000	2.2361	0.0151537
W5P759;A5PJM4;L8I1V5;Q5BIR2	>tr|W5P759|W5P759_SHEEP Uncharacterized protein OS=Ovis aries GN=AIFM2 PE=4 SV=1;>sp|A5PJM4|AIFM2_BOVIN Apoptosis-inducing factor 2 OS=Bos taurus GN=AIFM2 PE=2 SV=1;>tr|L8I1V5|L8I1V5_9CETA Apoptosis-inducing factor 2 OS=Bos mutus GN=M91_19092 PE=4 SV=1;>tr	4	5	5	5	18.8	41.883	8.84e-20	18335000	16011000	15501000	1.66157e+07	38199000	29462000		33830500	2.03606	0.0154208
Q3T122;W5QC84;L8J494	>sp|Q3T122|EIF3D_BOVIN Eukaryotic translation initiation factor 3 subunit D OS=Bos taurus GN=EIF3D PE=2 SV=1;>tr|W5QC84|W5QC84_SHEEP Eukaryotic translation initiation factor 3 subunit D OS=Ovis aries GN=EIF3D PE=3 SV=1;>tr|L8J494|L8J494_9CETA Eukaryotic tr	3	9	9	9	21.5	63.93	2.08e-89	56299000	77087000	52092000	61826000	192020000	142100000		167060000	2.7021	0.0155184
G3N252;L8IPZ9;P04975;W5NVY3;A6QLX5	>tr|G3N252|G3N252_BOVIN Clathrin light chain OS=Bos taurus GN=CLTB PE=3 SV=1;>tr|L8IPZ9|L8IPZ9_9CETA Clathrin light chain OS=Bos mutus GN=M91_19915 PE=3 SV=1;>sp|P04975|CLCB_BOVIN Clathrin light chain B OS=Bos taurus GN=CLTB PE=1 SV=1;>tr|W5NVY3|W5NVY3_SHE	5	4	4	4	14	26.554	8.2e-10	49545000	61531000	61273000	5.74497e+07	307970000	170570000	194410000	2.24317e+08	3.90458	0.0172542
E7D7Z1;F2X2Y7;Q9TTE2;W5Q2F5;L8HPP6;P21793;D8L6Y2	>tr|E7D7Z1|E7D7Z1_CERNI Decorin OS=Cervus nippon GN=DCN PE=2 SV=1;>tr|F2X2Y7|F2X2Y7_CAPHI Decorin OS=Capra hircus GN=DCN PE=2 SV=1;>sp|Q9TTE2|PGS2_SHEEP Decorin OS=Ovis aries GN=DCN PE=2 SV=1;>tr|W5Q2F5|W5Q2F5_SHEEP Decorin OS=Ovis aries GN=DCN PE=4 SV=1;>	7	5	5	5	16.1	39.924	1.3e-36	17396000	32696000	25063000	2.50517e+07	54580000	50950000		52765000	2.10625	0.0179191
A6H7H1;W5PDX8;F1MUK8;L8I6Z7	>sp|A6H7H1|F120A_BOVIN Constitutive coactivator of PPAR-gamma-like protein 1 OS=Bos taurus GN=FAM120A PE=2 SV=1;>tr|W5PDX8|W5PDX8_SHEEP Uncharacterized protein OS=Ovis aries GN=FAM120A PE=4 SV=1;>tr|F1MUK8|F1MUK8_BOVIN Constitutive coactivator of PPAR-gamm	4	7	7	7	8.3	121.55	9.44e-33	18648000	26229000	13294000	1.93903e+07	42018000	51714000		46866000	2.41698	0.0199344
B0LXL2;B0LXL3;P30932;W5PFL8;L8HXM8;G8JKX6	>tr|B0LXL2|B0LXL2_CAPHI Tetraspanin OS=Capra hircus PE=2 SV=1;>tr|B0LXL3|B0LXL3_SHEEP Tetraspanin OS=Ovis aries PE=2 SV=1;>sp|P30932|CD9_BOVIN CD9 antigen OS=Bos taurus GN=CD9 PE=2 SV=2;>tr|W5PFL8|W5PFL8_SHEEP Tetraspanin OS=Ovis aries GN=CD9 PE=3 SV=1;>tr	6	1	1	1	3.5	25.223	8.95e-13	91271000	101050000	90070000	9.41303e+07	449650000	243950000	279080000	3.24227e+08	3.44444	0.0224238
L8HUQ0;E1BFB0;W5PJ75;W5NV97;P85985	>tr|L8HUQ0|L8HUQ0_9CETA Spectrin alpha chain, brain OS=Bos mutus GN=M91_12719 PE=4 SV=1;>tr|E1BFB0|E1BFB0_BOVIN Uncharacterized protein OS=Bos taurus GN=SPTAN1 PE=1 SV=2;>tr|W5PJ75|W5PJ75_SHEEP Uncharacterized protein OS=Ovis aries GN=SPTAN1 PE=4 SV=1	5	44	44	44	21.6	285.72	0	151940000	197760000	137340000	1.62347e+08	459050000	256840000	413000000	3.76297e+08	2.31786	0.0285324
L8IJW9;A7E3T1;Q3ZBH3	>tr|L8IJW9|L8IJW9_9CETA Tetraspanin OS=Bos mutus GN=M91_06724 PE=3 SV=1;>tr|A7E3T1|A7E3T1_BOVIN Tetraspanin OS=Bos taurus GN=CD151 PE=2 SV=1;>sp|Q3ZBH3|CD151_BOVIN CD151 antigen OS=Bos taurus GN=CD151 PE=2 SV=1	3	6	6	6	18.4	34.377	9.37e-29	260720000	170870000	162000000	1.97863e+08	409680000	304890000	482680000	3.99083e+08	2.01696	0.0291691
B9VH02;Q32LC3;Q56JW9;L8IIQ4;O62741	>tr|B9VH02|B9VH02_SHEEP X-linked eukaryotic translation initiation factor 1A OS=Ovis aries GN=EIF1AX PE=2 SV=1;>tr|Q32LC3|Q32LC3_BOVIN Eukaryotic translation initiation factor 1A, X-linked OS=Bos taurus GN=EIF1AX PE=2 SV=1;>tr|Q56JW9|Q56JW9_BOVIN X-linked	5	2	2	2	14.6	16.46	0.0001829	8516400	12400000	5862800	8926400	20572000	17898000		19235000	2.15484	0.0299871
F1N579;Q2TBG2;W5NSB6;L8I5G3	>tr|F1N579|F1N579_BOVIN Uncharacterized protein OS=Bos taurus GN=EPN1 PE=4 SV=1;>tr|Q2TBG2|Q2TBG2_BOVIN Epsin 1 OS=Bos taurus GN=EPN1 PE=2 SV=1;>tr|W5NSB6|W5NSB6_SHEEP Uncharacterized protein OS=Ovis aries PE=4 SV=1;>tr|L8I5G3|L8I5G3_9CETA Epsin-1 (Fragmen	4	3	3	2	6.9	60.095	9.56e-24	5918900	6191900		6055400	16615000	13441000		15028000	2.48175	0.0300994
F1MYC9;L8HVM3;W5NZX9;Q1RMK4;P85986	>tr|F1MYC9|F1MYC9_BOVIN Spectrin beta chain OS=Bos taurus GN=SPTBN1 PE=1 SV=1;>tr|L8HVM3|L8HVM3_9CETA Spectrin beta chain OS=Bos mutus GN=M91_13492 PE=3 SV=1;>tr|W5NZX9|W5NZX9_SHEEP Spectrin beta chain OS=Ovis aries GN=SPTBN1 PE=3 SV=1	5	46	46	46	25.7	274.39	0	133570000	202400000	127390000	1.54453e+08	477950000	259340000	333360000	3.56883e+08	2.31062	0.0418389
L8IV55;F1MMS9;A6QQN8;F6RB56;A6QNY9	>tr|L8IV55|L8IV55_9CETA Integrin alpha-3 OS=Bos mutus GN=M91_15605 PE=3 SV=1;>sp|F1MMS9|ITA3_BOVIN Integrin alpha-3 OS=Bos taurus GN=ITGA3 PE=3 SV=1	5	13	13	1	14.6	118.5	7.43e-95	141700000	94185000	58003000	9.79627e+07	310710000	234060000	168650000	2.37807e+08	2.42752	0.0426656
W5PS64;W5PS66	>tr|W5PS64|W5PS64_SHEEP Uncharacterized protein OS=Ovis aries GN=GNA14 PE=4 SV=1;>tr|W5PS66|W5PS66_SHEEP Uncharacterized protein OS=Ovis aries GN=GNA14 PE=4 SV=1	2	10	1	1	36.9	35.384	8.12e-129	43891000	26008000	18759000	2.95527e+07	83924000	142380000	68222000	9.81753e+07	3.32205	0.0446795
W5PHC4	>tr|W5PHC4|W5PHC4_SHEEP Uncharacterized protein OS=Ovis aries GN=EIF2S2 PE=4 SV=1	1	9	1	1	31.2	38.386	9.96e-110	20078000	22508000		21293000	59641000	53652000	36997000	5.00967e+07	2.35273	0.0465639
F1MBW3;L8I0E4;W5Q981;W5Q980;A7E3D9	>tr|F1MBW3|F1MBW3_BOVIN Uncharacterized protein OS=Bos taurus GN=ACSL4 PE=4 SV=1;>tr|L8I0E4|L8I0E4_9CETA Long-chain-fatty-acid--CoA ligase 4 (Fragment) OS=Bos mutus GN=M91_09148 PE=4 SV=1;>tr|W5Q981|W5Q981_SHEEP Uncharacterized protein OS=Ovis aries GN=ACS	5	10	9	9	20.4	80.609	4.4e-71	23750000	32148000	84820000	46906000	171650000	122160000		146905000	3.1319	0.0476248
P38408;L8IQL8;W5P2U6;E1BIL1;G3N0K2;L8J4H4	>sp|P38408|GNA14_BOVIN Guanine nucleotide-binding protein subunit alpha-14 OS=Bos taurus GN=GNA14 PE=2 SV=1;>tr|L8IQL8|L8IQL8_9CETA Guanine nucleotide-binding protein subunit alpha-14 (Fragment) OS=Bos mutus GN=M91_05528 PE=4 SV=1	6	11	6	1	32.1	41.498	1.16e-120	27150000	27992000	20224000	25122000	68358000	67199000	138710000	9.14223e+07	3.63913	0.0493733
W5PDR6;F1N6V4;Q3ZC43	>tr|W5PDR6|W5PDR6_SHEEP Uncharacterized protein OS=Ovis aries GN=EXOC7 PE=4 SV=1;>tr|F1N6V4|F1N6V4_BOVIN Uncharacterized protein OS=Bos taurus GN=EXOC7 PE=4 SV=1;>tr|Q3ZC43|Q3ZC43_BOVIN Exocyst complex component 7 OS=Bos taurus GN=EXOC7 PE=2 SV=1	3	3	3	3	7.1	83.437	1.13e-13	6835800	6830100		6832950	11307000	11168000		11237500	1.6446	0.000249307
K4GWI0;P06623;W5Q9U3	>tr|K4GWI0|K4GWI0_SHEEP 2,3-cyclic-nucleotide 3-phosphodiesterase OS=Ovis aries PE=2 SV=1;>sp|P06623|CN37_BOVIN 2,3-cyclic-nucleotide 3-phosphodiesterase OS=Bos taurus GN=CNP PE=2 SV=2;>tr|W5Q9U3|W5Q9U3_SHEEP Uncharacterized protein OS=Ovis aries GN=	3	9	9	9	26	47.4	7.75e-110	62354000	61509000	59072000	6.09783e+07	103870000	119390000	118520000	1.13927e+08	1.86831	0.000497116
L8IQ42;F1MWF0	>tr|L8IQ42|L8IQ42_9CETA Huntingtin-interacting protein 1 (Fragment) OS=Bos mutus GN=M91_01051 PE=4 SV=1;>tr|F1MWF0|F1MWF0_BOVIN Uncharacterized protein OS=Bos taurus GN=HIP1 PE=4 SV=2	2	23	23	5	27.7	117.62	1.1e-142	79977000	73921000	87733000	8.05437e+07	178040000	147930000	138310000	154760000	1.92144	0.00417414
A4FV54;C5IJ83;I1VE56;L8I757	>sp|A4FV54|RAB8A_BOVIN Ras-related protein Rab-8A OS=Bos taurus GN=RAB8A PE=2 SV=1;>tr|C5IJ83|C5IJ83_SHEEP RAB8A OS=Ovis aries GN=RAB8A PE=2 SV=1;>tr|I1VE56|I1VE56_CAPHI RAS oncogene protein OS=Capra hircus GN=RAB8A PE=2 SV=1;>tr|L8I757|L8I757_9CETA Ras-re	4	6	4	4	28.5	23.684	2.61e-54	27768000	25468000	26730000	2.66553e+07	44078000	39137000	35186000	39467000	1.48064	0.00850894
F1N6C0;L8I8Z0;L8IYP5;W5NZX8;P62157;Q6YNX6;L8ILQ4;W5P5I7;L8IJ39;W5QJ98;F4YD05;F1MLH6;L8J041	>tr|F1N6C0|F1N6C0_BOVIN Uncharacterized protein OS=Bos taurus GN=CALM1 PE=4 SV=2;>tr|L8I8Z0|L8I8Z0_9CETA Uncharacterized protein (Fragment) OS=Bos mutus GN=M91_02221 PE=4 SV=1;>tr|L8IYP5|L8IYP5_9CETA Uncharacterized protein OS=Bos mutus GN=M91_02182 PE=4 S	13	10	10	4	57.3	16.966	1.11e-287	1355200000	1069900000	1316000000	1.24703e+09	2239500000	1775500000	1813900000	1.94297e+09	1.55807	0.01596
Q2HJD0;W5NW29	>sp|Q2HJD0|FAF2_BOVIN FAS-associated factor 2 OS=Bos taurus GN=FAF2 PE=2 SV=1;>tr|W5NW29|W5NW29_SHEEP Uncharacterized protein OS=Ovis aries GN=FAF2 PE=4 SV=1	2	4	4	4	10.8	52.663	6.61e-12	10918000	7551400		9234700	16236000	14842000	17033000	16037000	1.7366	0.0201583
L8IJB0;E1BIM8;W5Q965;W5Q964;W5QII2;W5QII1;B7U173;Q3ZCM0	>tr|L8IJB0|L8IJB0_9CETA Tyrosine-protein kinase OS=Bos mutus GN=M91_02807 PE=3 SV=1;>tr|E1BIM8|E1BIM8_BOVIN Tyrosine-protein kinase OS=Bos taurus GN=SRC PE=3 SV=1;>tr|W5Q965|W5Q965_SHEEP Tyrosine-protein kinase OS=Ovis aries GN=SRC PE=3 SV=1;>tr|W5Q964|W5Q	8	9	4	4	17.5	60.972	4.44e-21	15281000	17815000	16437000	16511000	21047000	18853000	22534000	2.08113e+07	1.26045	0.0294259
F1MH34;W5PRK4;W5PRK6;L8I955;A6QNY4	>tr|F1MH34|F1MH34_BOVIN Uncharacterized protein OS=Bos taurus GN=STAU1 PE=4 SV=2;>tr|W5PRK4|W5PRK4_SHEEP Uncharacterized protein OS=Ovis aries GN=STAU1 PE=4 SV=1;>tr|W5PRK6|W5PRK6_SHEEP Uncharacterized protein OS=Ovis aries GN=STAU1 PE=4 SV=1;>tr|L8I955|L8	5	3	3	3	5.7	76.89	3.4e-12	10448000	5797300	9523400	8.58957e+06	16458000	15259000		15858500	1.84625	0.030967
Q3B7N2;A4ZZF8	>sp|Q3B7N2|ACTN1_BOVIN Alpha-actinin-1 OS=Bos taurus GN=ACTN1 PE=2 SV=1;>tr|A4ZZF8|A4ZZF8_BOVIN Alpha-actinin 1 OS=Bos taurus GN=ACTN1 PE=2 SV=1	2	47	30	0	63.1	102.98	0	638940000	854830000	719420000	737730000	1247800000	1076000000	942920000	1.08891e+09	1.47602	0.0317052
E1BB91;G3N3E4;G3N126;Q9MZW2	>tr|E1BB91|E1BB91_BOVIN Uncharacterized protein OS=Bos taurus GN=COL6A3 PE=1 SV=1;>tr|G3N3E4|G3N3E4_BOVIN Uncharacterized protein OS=Bos taurus GN=COL6A3 PE=1 SV=1	4	42	5	5	15.7	342.4	2.42e-193	10835000	28896000	31479000	2.37367e+07	50651000	41504000	47071000	4.64087e+07	1.95515	0.0319578
W5PH02	>tr|W5PH02|W5PH02_SHEEP Uncharacterized protein OS=Ovis aries PE=4 SV=1	1	3	1	1	20.4	26.809	1.46e-111	33133000	26286000	44429000	34616000	48173000	65051000	69136000	6.07867e+07	1.75603	0.0346064
A0A1D9CFF1;W5QGV9	>tr|A0A1D9CFF1|A0A1D9CFF1_SHEEP Notch2 OS=Ovis aries GN=Notch2 PE=2 SV=1;>tr|W5QGV9|W5QGV9_SHEEP Uncharacterized protein OS=Ovis aries GN=NOTCH2 PE=4 SV=1	2	29	1	1	13	265.24	3.57e-146	15873000	19834000	19825000	1.85107e+07	39361000	27693000	27205000	3.14197e+07	1.69738	0.0368023
O97491;W5PZR1;X2KK20;X2KN74;A5D7R0;H9AA71;P51867;I3W7D8	>tr|O97491|O97491_SHEEP Fas protein OS=Ovis aries GN=Fas PE=2 SV=1;>tr|W5PZR1|W5PZR1_SHEEP Uncharacterized protein OS=Ovis aries GN=FAS PE=4 SV=1;>tr|X2KK20|X2KK20_CAPHI Fas OS=Capra hircus GN=Fas PE=2 SV=1;>tr|X2KN74|X2KN74_CAPHI Fas OS=Capra hircus GN=Fa	8	3	3	3	12.2	36.928	4.72e-38	15626000	15198000	27785000	1.95363e+07	31607000	40262000	32292000	3.47203e+07	1.77722	0.037932
W5Q5K3;F1MPZ9;L8IJT7	>tr|W5Q5K3|W5Q5K3_SHEEP Uncharacterized protein OS=Ovis aries GN=NCKAP1 PE=4 SV=1;>tr|F1MPZ9|F1MPZ9_BOVIN Uncharacterized protein OS=Bos taurus GN=NCKAP1 PE=4 SV=2;>tr|L8IJT7|L8IJT7_9CETA Nck-associated protein 1 (Fragment) OS=Bos mutus GN=M91_06997 PE=4 S	3	14	14	14	13.1	128.73	3.53e-35	42780000	32229000	31365000	35458000	67098000	46063000	73174000	6.21117e+07	1.7517	0.0414403
B2CZF0;B2MVW1;Q3ZCD0;W5NYZ6;L8I3A3;G3MYH4	>tr|B2CZF0|B2CZF0_CAPHI Tetraspanin OS=Capra hircus PE=2 SV=1;>tr|B2MVW1|B2MVW1_SHEEP Tetraspanin OS=Ovis aries GN=CD81 PE=2 SV=1;>sp|Q3ZCD0|CD81_BOVIN CD81 antigen OS=Bos taurus GN=CD81 PE=2 SV=1	6	3	3	3	16.5	25.669	6.87e-186	21732000	14447000	10445000	1.55413e+07	31989000	25331000	24273000	2.71977e+07	1.75002	0.0464783
W5NUN1;G3N2R0;L8IZ02	>tr|W5NUN1|W5NUN1_SHEEP Uncharacterized protein OS=Ovis aries GN=STX11 PE=3 SV=1;>tr|G3N2R0|G3N2R0_BOVIN Uncharacterized protein OS=Bos taurus GN=STX11 PE=3 SV=1;>tr|L8IZ02|L8IZ02_9CETA Syntaxin-11 OS=Bos mutus GN=M91_17460 PE=3 SV=1	3	5	5	5	25	33.219	8.75e-41	30100000	29902000		30001000	46007000	39265000	52449000	45907000	1.53018	0.0479734
E1BMW2;L8I2V3;W5PVL6;Q1JPJ7;Q9TS61	>tr|E1BMW2|E1BMW2_BOVIN Uncharacterized protein OS=Bos taurus GN=AP2A1 PE=1 SV=2;>tr|L8I2V3|L8I2V3_9CETA AP-2 complex subunit alpha-1 (Fragment) OS=Bos mutus GN=M91_17558 PE=4 SV=1;>tr|W5PVL6|W5PVL6_SHEEP Uncharacterized protein OS=Ovis aries GN=AP2A1 PE=4	5	34	34	23	42.8	106.91	1.33e-278	577860000	388050000	472300000	4.79403e+08	653410000	680850000	604040000	646100000	1.34772	0.0483319
L8ICI4;Q58DS9;W5QBQ8	>tr|L8ICI4|L8ICI4_9CETA Ras-related protein Rab-5C OS=Bos mutus GN=M91_17147 PE=4 SV=1;>sp|Q58DS9|RAB5C_BOVIN Ras-related protein Rab-5C OS=Bos taurus GN=RAB5C PE=2 SV=1;>tr|W5QBQ8|W5QBQ8_SHEEP Uncharacterized protein OS=Ovis aries GN=RAB5C PE=4 SV=1	3	8	5	5	50	23.466	4.01e-183	87297000	109630000	120480000	1.05802e+08	146070000	125250000	151060000	1.40793e+08	1.33072	0.0495821
G1DGE0;W5NVF1;L8J4I5;F1MLZ1	>tr|G1DGE0|G1DGE0_CAPHI Cytochrome b reductase 1 OS=Capra hircus GN=CYBRD1 PE=2 SV=1;>tr|W5NVF1|W5NVF1_SHEEP Uncharacterized protein OS=Ovis aries GN=CYBRD1 PE=4 SV=1;>tr|L8J4I5|L8J4I5_9CETA Cytochrome b reductase 1 (Fragment) OS=Bos mutus GN=M91_01854 PE=	4	2	2	2	7.7	31.44	1.05e-21	87716000	94226000	100210000	9.40507e+07	127580000	123940000	177210000	142910000	1.5195	0.0496699
A6QPP9;F1MD83;L8IWR4;W5PZF0;P02777;P30035	>tr|A6QPP9|A6QPP9_BOVIN C-X-C motif chemokine OS=Bos taurus GN=PF4 PE=2 SV=1;>tr|F1MD83|F1MD83_BOVIN C-X-C motif chemokine OS=Bos taurus GN=PF4 PE=3 SV=1;>tr|L8IWR4|L8IWR4_9CETA C-X-C motif chemokine OS=Bos mutus GN=M91_08167 PE=3 SV=1;>tr|W5PZF0|W5PZF0_SH	6	2	2	2	16.1	12.609	7.27e-13	72766000	86092000		79429000	14544000	36069000		25306500	0.318605	0.0505846
G3X8E2;L8IHP5;W5P023	>tr|G3X8E2|G3X8E2_BOVIN Uncharacterized protein OS=Bos taurus GN=VPS4A PE=3 SV=1;>tr|L8IHP5|L8IHP5_9CETA Vacuolar protein sorting-associated protein 4A (Fragment) OS=Bos mutus GN=M91_18227 PE=3 SV=1;>tr|W5P023|W5P023_SHEEP Uncharacterized protein OS=Ovis a	3	2	1	1	5.3	49.003	7.08e-06		7110000	6559500	6834750	11665000	14572000		13118500	1.91938	0.0512039
W5PGC0;F1MF50;L8ICB7;W5PGB5;Q8MIT6	>tr|W5PGC0|W5PGC0_SHEEP Rho-associated protein kinase OS=Ovis aries GN=ROCK1 PE=3 SV=1;>tr|F1MF50|F1MF50_BOVIN Rho-associated protein kinase OS=Bos taurus GN=ROCK1 PE=3 SV=2;>tr|L8ICB7|L8ICB7_9CETA Rho-associated protein kinase OS=Bos mutus GN=M91_00549 PE	5	6	3	3	4.3	160.18	3.33e-11	5670100	5999800	5316700	5662200	6040900	6841100	6664000	6.51533e+06	1.15067	0.05254
W5PLS0	>tr|W5PLS0|W5PLS0_SHEEP Uncharacterized protein OS=Ovis aries GN=CPD PE=4 SV=1	1	9	9	1	7.3	146.5	2.63e-21	29317000	34905000	42212000	35478000	20017000	20855000		20436000	0.576019	0.0527054
A0A140T846;L8I634;P23196;W5QEQ3;G1DFN8;V5QPC4;W5NUX2	>tr|A0A140T846|A0A140T846_BOVIN DNA-(apurinic or apyrimidinic site) lyase OS=Bos taurus GN=APEX1 PE=3 SV=1;>tr|L8I634|L8I634_9CETA DNA-(apurinic or apyrimidinic site) lyase OS=Bos mutus GN=M91_09639 PE=3 SV=1;>sp|P23196|APEX1_BOVIN DNA-(apurinic or apyrimi	7	5	5	5	21.7	35.583	7.4e-24	16120000		13252000	14686000	35296000	24487000	26031000	2.86047e+07	1.94775	0.0532002
P11116;P81184	>tr|P11116|P11116_BOVIN Galectin OS=Bos taurus GN=LGALS1 PE=4 SV=1 >tr|P81184|P81184|_SHEEP Galectin OS=Ovis aries GN=LGALS1 PE=2 SV=1	1	71	71	1	24.8	394.74	0	361740000	395300000	556720000	437920000	513340000	921750000	1116120000	8.50403e+08	1.94191	0.0538263
L8J1A8;W5PU66;F1MC48	>tr|L8J1A8|L8J1A8_9CETA Ras GTPase-activating-like protein IQGAP1 (Fragment) OS=Bos mutus GN=M91_17731 PE=4 SV=1;>tr|W5PU66|W5PU66_SHEEP Uncharacterized protein OS=Ovis aries GN=IQGAP1 PE=4 SV=1;>tr|F1MC48|F1MC48_BOVIN Uncharacterized protein OS=Bos taurus	3	55	55	53	44.4	187.71	0	1082600000	1353300000	1038800000	1.15823e+09	2398700000	2576500000	1445500000	2.14023e+09	1.84784	0.0544892
Q6QRN7	>tr|Q6QRN7|Q6QRN7_BOVIN PP1201 protein OS=Bos taurus GN=RECS1 PE=2 SV=1	1	1	1	1	3.9	33.948	2.39e-35	62401000	69148000	77689000	69746000	97591000	152960000	103860000	118137000	1.69382	0.0552215
L8HR20;Q1LZA3;W5P3L4;A1L588	>tr|L8HR20|L8HR20_9CETA Asparagine synthetase [glutamine-hydrolyzing] OS=Bos mutus GN=M91_04474 PE=4 SV=1;>sp|Q1LZA3|ASNS_BOVIN Asparagine synthetase [glutamine-hydrolyzing] OS=Bos taurus GN=ASNS PE=2 SV=3;>tr|W5P3L4|W5P3L4_SHEEP Uncharacterized protein OS	4	3	3	3	5.9	64.219	8.93e-11	33505000	57818000	35703000	42342000	21606000	22519000	20440000	2.15217e+07	0.508282	0.0555947
W5QCL6;E1BH82;L8J093;P68399;W5QCL5;A8QJ92	>tr|W5QCL6|W5QCL6_SHEEP Uncharacterized protein OS=Ovis aries GN=CSNK2A1 PE=3 SV=1;>tr|E1BH82|E1BH82_BOVIN Casein kinase II subunit alpha OS=Bos taurus GN=CSNK2A1 PE=4 SV=2;>tr|L8J093|L8J093_9CETA Casein kinase II subunit alpha OS=Bos mutus GN=M91_18135 PE	6	10	10	10	32.1	45.435	1.52e-259	275940000	314120000	155670000	2.48577e+08	76355000	156030000	79275000	1.03887e+08	0.417926	0.0564179
A0A089FXT1;W5Q8K4;L8I2E4;Q08DL0;Q5EA54;Q3T0F0;Q58DQ6;F1N2B5	>tr|A0A089FXT1|A0A089FXT1_BUBBU Solute carrier family 3 member 2 OS=Bubalus bubalis GN=SLC3A2 PE=2 SV=1;>tr|W5Q8K4|W5Q8K4_SHEEP Uncharacterized protein OS=Ovis aries GN=SLC3A2 PE=4 SV=1;>tr|L8I2E4|L8I2E4_9CETA 4F2 cell-surface antigen heavy chain OS=Bos mu	8	6	6	6	11.4	63.11	2.12e-29	266810000	289530000	414450000	3.23597e+08	135330000	228900000	181710000	181980000	0.562367	0.05644
L8J3V4;W5PQD8;A7MB82	>tr|L8J3V4|L8J3V4_9CETA Complement C1q tumor necrosis factor-related protein 3 OS=Bos mutus GN=M91_05505 PE=4 SV=1;>tr|W5PQD8|W5PQD8_SHEEP Uncharacterized protein OS=Ovis aries GN=C1QTNF3 PE=4 SV=1;>tr|A7MB82|A7MB82_BOVIN C1QTNF3 protein OS=Bos taurus GN=C	3	5	5	5	15.4	34.953	1.51e-14	67429000	35546000	51945000	51640000	12736000	18039000		15387500	0.297976	0.0572449
W5PTR5;L8IPP0;M4NBE4;Q0VCX2;C7EDP2;C7EDP1;F1N614;Q4TVY4;Q6KDN8	>tr|W5PTR5|W5PTR5_SHEEP Uncharacterized protein OS=Ovis aries GN=HSPA5 PE=3 SV=1;>tr|L8IPP0|L8IPP0_9CETA 78 kDa glucose-regulated protein OS=Bos mutus GN=M91_20624 PE=3 SV=1;>tr|M4NBE4|M4NBE4_CAPHI Heat shock 70kDa protein 5 OS=Capra hircus GN=HSPA5 PE=2 S	9	33	33	31	52.6	72.554	0	7245100000	5434200000	8982900000	7.22073e+09	2112700000	3479200000	5251600000	3614500000	0.500572	0.0579755
F1MXX6;L8HR34;M4QG36;Q3T0K7;Q95114;G3MYW7	>tr|F1MXX6|F1MXX6_BOVIN Lactadherin OS=Bos taurus GN=MFGE8 PE=1 SV=1;>tr|L8HR34|L8HR34_9CETA Lactadherin OS=Bos mutus GN=M91_06780 PE=4 SV=1;>tr|M4QG36|M4QG36_BUBBU Insulin induced protein 1 OS=Bubalus bubalis GN=MFGE8 PE=2 SV=1;>tr|Q3T0K7|Q3T0K7_BOVIN MFG	6	4	4	2	9.5	47.846	3.96e-15	73788000	39095000	108770000	7.38843e+07	140760000	120860000	195610000	152410000	2.06282	0.0593226
A1A4K4;W5NQB9;E1BMF9;L8J4J3;Q8MKF0	>tr|A1A4K4|A1A4K4_BOVIN Lethal giant larvae homolog 1 (Drosophila) OS=Bos taurus GN=LLGL1 PE=2 SV=1;>tr|W5NQB9|W5NQB9_SHEEP Uncharacterized protein OS=Ovis aries GN=LLGL1 PE=4 SV=1;>tr|E1BMF9|E1BMF9_BOVIN Lethal(2) giant larvae protein homolog 1 OS=Bos tau	5	1	1	1	1.1	117.71	0.0012186	6028100		5097800	5562950	8349300	7559900		7954600	1.42992	0.0593305
L8HZM0;Q0VBZ9;G3MY11;W5QIH4;G3MZA0	>tr|L8HZM0|L8HZM0_9CETA MARCKS-related protein OS=Bos mutus GN=M91_11100 PE=4 SV=1;>sp|Q0VBZ9|MRP_BOVIN MARCKS-related protein OS=Bos taurus GN=MARCKSL1 PE=2 SV=1;>tr|G3MY11|G3MY11_BOVIN MARCKS-related protein OS=Bos taurus GN=MARCKSL1 PE=1 SV=1;>tr|W5QIH4	5	2	2	2	14.1	19.825	3.82e-12	47485000	57047000	79190000	6.12407e+07	31704000	42887000	26899000	33830000	0.552411	0.0596414
A0A050;Q4LBE4;A4ZVX1	>tr|A0A050|A0A050_BISBI MHC class I alpha chain (Fragment) OS=Bison bison GN=Bibi-N PE=2 SV=1;>tr|Q4LBE4|Q4LBE4_SHEEP MHC class I antigen (Fragment) OS=Ovis aries GN=ovar-MHCI-E2 PE=2 SV=2	3	8	2	0	28.1	40.084	2.94e-36	36120000	52550000	62135000	5.02683e+07	29352000	21631000	34168000	2.83837e+07	0.564643	0.0602608
W5NVR8	>tr|W5NVR8|W5NVR8_SHEEP Uncharacterized protein OS=Ovis aries GN=COL5A1 PE=4 SV=1	1	26	20	2	20.4	183.53	0	450030000	284810000	410660000	3.81833e+08	29035000	149570000	282200000	1.53602e+08	0.402274	0.0613504
F1MSZ6;L8IU68;P41361;P32262;W5PTR4	>tr|F1MSZ6|F1MSZ6_BOVIN Antithrombin-III OS=Bos taurus GN=SERPINC1 PE=3 SV=1;>tr|L8IU68|L8IU68_9CETA Antithrombin-III OS=Bos mutus GN=M91_17757 PE=3 SV=1;>sp|P41361|ANT3_BOVIN Antithrombin-III OS=Bos taurus GN=SERPINC1 PE=1 SV=2;>sp|P32262|ANT3_SHEEP Antit	5	13	13	13	34	52.44	2.12e-174	141590000	160780000	343300000	2.15223e+08	493010000	330370000	588730000	4.70703e+08	2.18705	0.0614371
W5QC41	>tr|W5QC41|W5QC41_SHEEP Pyruvate kinase OS=Ovis aries GN=PKM PE=3 SV=1	1	34	1	1	64.6	61.591	0	76734000	102700000	40251000	7.32283e+07	351010000	365420000	123180000	279870000	3.82188	0.062217
A5PKL9;F1MXY2;Q64L89;W5QHB9	>tr|A5PKL9|A5PKL9_BOVIN MGST1 protein OS=Bos taurus GN=MGST1 PE=2 SV=1;>tr|F1MXY2|F1MXY2_BOVIN Microsomal glutathione S-transferase 1 OS=Bos taurus GN=MGST1 PE=4 SV=1;>sp|Q64L89|MGST1_BOVIN Microsomal glutathione S-transferase 1 OS=Bos taurus GN=MGST1 PE=2	4	1	1	1	8.4	17.64	3e-07	25944000	42144000	53657000	4.05817e+07	15464000	24900000	14537000	1.83003e+07	0.450951	0.0624343
W5QBL7	>tr|W5QBL7|W5QBL7_SHEEP Uncharacterized protein OS=Ovis aries GN=ARPC1B PE=4 SV=1	1	8	1	1	24.7	40.273	7.18e-47	24374000	17651000	19272000	2.04323e+07	48602000	31722000		40162000	1.96561	0.0627052
W5NUR4	>tr|W5NUR4|W5NUR4_SHEEP Uncharacterized protein OS=Ovis aries GN=ADAM9 PE=4 SV=1	1	15	15	4	21.3	90.746	1.4e-128	197510000	161840000	165750000	1.75033e+08	85185000	155200000	100780000	1.13722e+08	0.649714	0.0632833
D3K0R6;L8IUL0;F1MQ01;W5PCE7;L8HNZ5;F1MS16;W5PCE8;W5PGI9;Q28164;W5Q3L8;W5NYC3;W5NUL6;W5NVT1;W5NVU9;E3VXD0	>sp|D3K0R6|AT2B4_BOVIN Plasma membrane calcium-transporting ATPase 4 OS=Bos taurus GN=ATP2B4 PE=1 SV=2;>tr|L8IUL0|L8IUL0_9CETA Plasma membrane calcium-transporting ATPase 4 (Fragment) OS=Bos mutus GN=M91_14776 PE=3 SV=1;>tr|F1MQ01|F1MQ01_BOVIN Calcium-tran	15	24	13	10	27.2	133.79	0	188880000	116510000	206410000	170600000	215610000	353060000	323840000	2.97503e+08	1.74386	0.0642792
W5QEM5;W5Q694;A4FUA8;L8J1U4	>tr|W5QEM5|W5QEM5_SHEEP Uncharacterized protein OS=Ovis aries PE=3 SV=1;>tr|W5Q694|W5Q694_SHEEP Uncharacterized protein OS=Ovis aries GN=CAPZA1 PE=3 SV=1;>sp|A4FUA8|CAZA1_BOVIN F-actin-capping protein subunit alpha-1 OS=Bos taurus GN=CAPZA1 PE=2 SV=1;>tr|L	4	9	9	8	45.2	33.564	1.56e-240	241840000	257730000	219500000	239690000	301120000	256620000	298420000	2.85387e+08	1.19065	0.0657865
Q3T0X6;W5P7Z1;L8HSW7;E1BAT6	>sp|Q3T0X6|RS16_BOVIN 40S ribosomal protein S16 OS=Bos taurus GN=RPS16 PE=2 SV=3;>tr|W5P7Z1|W5P7Z1_SHEEP Uncharacterized protein OS=Ovis aries PE=3 SV=1;>tr|L8HSW7|L8HSW7_9CETA 40S ribosomal protein S16 OS=Bos mutus GN=M91_19567 PE=3 SV=1;>tr|E1BAT6|E1BAT6	4	8	8	8	50	16.445	2.08e-25	180900000	175790000	55154000	1.37281e+08	418460000	415540000	200880000	344960000	2.5128	0.0664823
L8IFN2;Q56JZ5;W5PLY1;W5PLY2	>tr|L8IFN2|L8IFN2_9CETA Eukaryotic translation initiation factor 3 subunit H (Fragment) OS=Bos mutus GN=M91_19966 PE=3 SV=1;>sp|Q56JZ5|EIF3H_BOVIN Eukaryotic translation initiation factor 3 subunit H OS=Bos taurus GN=EIF3H PE=2 SV=1;>tr|W5PLY1|W5PLY1_SHEEP	4	6	6	6	21.6	40.286	3.03e-53	35384000	17517000	15190000	22697000	95279000	41925000	58577000	6.52603e+07	2.87528	0.0665256
F1MZN7;L8ILJ4;W5QCB0;Q2TBW7	>tr|F1MZN7|F1MZN7_BOVIN Sorting nexin-2 OS=Bos taurus GN=SNX2 PE=4 SV=2;>tr|L8ILJ4|L8ILJ4_9CETA Sorting nexin-2 OS=Bos mutus GN=M91_00335 PE=4 SV=1;>tr|W5QCB0|W5QCB0_SHEEP Uncharacterized protein OS=Ovis aries GN=SNX2 PE=4 SV=1;>sp|Q2TBW7|SNX2_BOVIN Sortin	4	6	6	4	14.1	58.434	3.99e-29	39698000	45725000	54674000	46699000	90676000	65422000	60667000	72255000	1.54725	0.0677458
W5QB88;L8IIA5;F1N0K0;Q28083;F1MRP6;Q32S24;Q863E4;W5PXA7;W5PEV2;F1MJQ6	>tr|W5QB88|W5QB88_SHEEP Uncharacterized protein OS=Ovis aries GN=COL11A1 PE=4 SV=1;>tr|L8IIA5|L8IIA5_9CETA Collagen alpha-1(XI) chain OS=Bos mutus GN=M91_14129 PE=4 SV=1;>tr|F1N0K0|F1N0K0_BOVIN Collagen alpha-1(XI) chain OS=Bos taurus GN=COL11A1 PE=4 SV=2	10	29	28	23	22.5	181.07	1.75e-210	408430000	187330000	396070000	330610000	53023000	51316000	219690000	1.0801e+08	0.326698	0.0705392
W5QCN3;F1MX49;L8HUZ5;W5QCN4	>tr|W5QCN3|W5QCN3_SHEEP Platelet-derived growth factor receptor alpha OS=Ovis aries GN=PDGFRA PE=3 SV=1;>tr|F1MX49|F1MX49_BOVIN Platelet-derived growth factor receptor alpha OS=Bos taurus GN=PDGFRA PE=3 SV=2;>tr|L8HUZ5|L8HUZ5_9CETA Platelet-derived growth	4	5	4	4	4.4	123.05	9.3e-10	8741700		8961600	8851650	23762000	13702000	21402000	19622000	2.21676	0.0709763
E1BN47;L8J1T1;W5Q2K9;W5PQA6;F1MX60;G1DGF7	>tr|E1BN47|E1BN47_BOVIN Cytoplasmic FMR1-interacting protein 1 OS=Bos taurus GN=CYFIP1 PE=4 SV=2;>tr|L8J1T1|L8J1T1_9CETA Cytoplasmic FMR1-interacting protein 1 (Fragment) OS=Bos mutus GN=M91_07923 PE=4 SV=1;>tr|W5Q2K9|W5Q2K9_SHEEP Uncharacterized protein O	6	15	15	15	12.8	148.79	2.5e-47	89854000	74841000	41449000	6.87147e+07	106910000	107530000	97905000	104115000	1.51518	0.0729074
W5NYE8;F1MGJ5	>tr|W5NYE8|W5NYE8_SHEEP Uncharacterized protein OS=Ovis aries GN=SEL1L PE=4 SV=1;>tr|F1MGJ5|F1MGJ5_BOVIN Uncharacterized protein OS=Bos taurus GN=SEL1L PE=4 SV=2	2	4	4	4	7.8	92.288	5.79e-16	50912000	43513000	61743000	52056000	7603800	34310000	36663000	2.61923e+07	0.503156	0.0732992
W5PQF8;G3X6L9	>tr|W5PQF8|W5PQF8_SHEEP Uncharacterized protein OS=Ovis aries GN=EPRS PE=3 SV=1;>tr|G3X6L9|G3X6L9_BOVIN Uncharacterized protein OS=Bos taurus GN=EPRS PE=1 SV=1	2	23	23	22	18.1	170.02	6.51e-134	223800000	261060000	152580000	212480000	118680000	149970000	41649000	103433000	0.486789	0.0736131
L8IAV8	>tr|L8IAV8|L8IAV8_9CETA Copine-1 OS=Bos mutus GN=M91_17818 PE=4 SV=1	1	9	7	0	20.9	58.89	7.18e-72	61133000	33316000		47224500	9896700	23790000	13264000	1.56502e+07	0.331401	0.0737231
O46415;W5PA59;W5PVJ0;W5P6T9;L8IKH0;F1MMT9;W5PTN1;L8IYC1;W5QH82;L8I1C7;L8HYX2;W5NYB9;W5NYC2;E1B888;Q862B3;L8IMM1;P18686	>sp|O46415|FRIL_BOVIN Ferritin light chain OS=Bos taurus GN=FTL PE=2 SV=3;>tr|W5PA59|W5PA59_SHEEP Ferritin OS=Ovis aries GN=LOC101117015 PE=3 SV=1;>tr|W5PVJ0|W5PVJ0_SHEEP Ferritin OS=Ovis aries PE=3 SV=1;>tr|W5P6T9|W5P6T9_SHEEP Ferritin OS=Ovis aries PE=3	17	8	8	8	65.1	19.987	8.11e-198	208150000	201720000	534330000	3.14733e+08	824980000	474100000	744990000	6.81357e+08	2.16487	0.0743382
W5NTT7	>tr|W5NTT7|W5NTT7_SHEEP Uncharacterized protein OS=Ovis aries GN=COL1A2 PE=4 SV=1	1	47	3	3	51.3	128.97	0	261630000	150870000	302320000	2.38273e+08	58335000	125440000	151030000	1.11602e+08	0.468377	0.0752595
G5E5K1;L8IET6;Q2TBX2;W5P0G8	>tr|G5E5K1|G5E5K1_BOVIN Prefoldin subunit 3 OS=Bos taurus GN=VBP1 PE=3 SV=1;>tr|L8IET6|L8IET6_9CETA Prefoldin subunit 3 OS=Bos mutus GN=M91_13583 PE=3 SV=1;>sp|Q2TBX2|PFD3_BOVIN Prefoldin subunit 3 OS=Bos taurus GN=VBP1 PE=2 SV=1;>tr|W5P0G8|W5P0G8_SHEEP Pr	4	4	4	4	28.4	22.486	2.67e-46	7928200	8101300		8014750	10768000	13025000		11896500	1.48433	0.0755115
W5P1K6	>tr|W5P1K6|W5P1K6_SHEEP Secretory carrier-associated membrane protein OS=Ovis aries GN=SCAMP3 PE=3 SV=1	1	1	1	1	3.7	38.651	3e-07	34217000	27792000	27268000	29759000	35713000	38407000	33782000	3.59673e+07	1.20862	0.0757803
L8IBS3;Q2KJ47;W5PP28	>tr|L8IBS3|L8IBS3_9CETA EH domain-containing protein 2 (Fragment) OS=Bos mutus GN=M91_02196 PE=3 SV=1;>tr|Q2KJ47|Q2KJ47_BOVIN EH-domain containing 2 OS=Bos taurus GN=EHD2 PE=1 SV=1;>tr|W5PP28|W5PP28_SHEEP Uncharacterized protein OS=Ovis aries GN=EHD2 PE=3	3	20	20	19	50.9	64.623	5.16e-225	394500000	409740000	257450000	3.53897e+08	1111500000	917490000	457350000	828780000	2.34187	0.0763821
F1MLE8;L8IJJ3;Q3T0L9;W5QGX9	>tr|F1MLE8|F1MLE8_BOVIN Uncharacterized protein OS=Bos taurus GN=SEC22B PE=3 SV=1;>tr|L8IJJ3|L8IJJ3_9CETA Vesicle-trafficking protein SEC22b OS=Bos mutus GN=M91_04618 PE=3 SV=1;>tr|Q3T0L9|Q3T0L9_BOVIN SEC22 vesicle trafficking protein homolog B (S. cerevis	4	6	6	6	29.5	28.709	2.7e-71	168490000	276030000	255680000	233400000	295160000	331910000	318710000	315260000	1.35073	0.0776804
A4ZYA6;L8IRX0;W5PNW7;P48616;K4P1S1;Q9MZA9;S5U5M9;Q19RN7;Q862F9;Q6STH6;L8IHY9;A6QQJ3;W5PJQ9;F1MDZ2;O77788;L8I697;L8I3G3;P02548;Q08DH7;W5PJP2;W5NZ56;W5NZ55;L8J157	>tr|A4ZYA6|A4ZYA6_SHEEP Vimentin (Fragment) OS=Ovis aries PE=2 SV=1;>tr|L8IRX0|L8IRX0_9CETA Vimentin (Fragment) OS=Bos mutus GN=M91_19473 PE=3 SV=1;>tr|W5PNW7|W5PNW7_SHEEP Vimentin OS=Ovis aries GN=VIM PE=3 SV=1;>sp|P48616|VIME_BOVIN Vimentin OS=Bos taurus	23	34	34	29	70	53.699	0	2332400000	1083600000	1222900000	1546300000	3059200000	4691700000	8398500000	5.38313e+09	3.4813	0.0779712
W5PG50;L8IN63;Q3T106;A6YLN1	>tr|W5PG50|W5PG50_SHEEP Uncharacterized protein OS=Ovis aries GN=SRSF7 PE=4 SV=1;>tr|L8IN63|L8IN63_9CETA Serine/arginine-rich splicing factor 7 OS=Bos mutus GN=M91_04044 PE=4 SV=1;>sp|Q3T106|SRSF7_BOVIN Serine/arginine-rich splicing factor 7 OS=Bos taurus	4	2	2	1	9.5	27.762	2.11e-06	59896000	52794000		56345000	116820000	90925000	78432000	9.53923e+07	1.693	0.0781495
W5QBE6;L8I8B7;Q2HJ58;W5QBE9;W5P584;A6QQ58;F1MBV2;L8HU61;W5PE70;L8ITB7;F6RJ91;Q4FCY7;Q4FD33	>tr|W5QBE6|W5QBE6_SHEEP Uncharacterized protein OS=Ovis aries PE=4 SV=1;>tr|L8I8B7|L8I8B7_9CETA Ribose-phosphate pyrophosphokinase 1 (Fragment) OS=Bos mutus GN=M91_07526 PE=3 SV=1;>sp|Q2HJ58|PRPS1_BOVIN Ribose-phosphate pyrophosphokinase 1 OS=Bos taurus GN	13	3	3	3	8.3	35.541	1.88e-05		3754100	4455600	4104850	11112000	6306100	10682000	9366700	2.28186	0.0781979
Q05927;L8ICQ2;W5PUV3;G3MZC1;F1MQM4	>sp|Q05927|5NTD_BOVIN 5-nucleotidase OS=Bos taurus GN=NT5E PE=1 SV=2;>tr|L8ICQ2|L8ICQ2_9CETA 5-nucleotidase (Fragment) OS=Bos mutus GN=M91_20600 PE=3 SV=1;>tr|W5PUV3|W5PUV3_SHEEP Uncharacterized protein OS=Ovis aries GN=NT5E PE=3 SV=1;>tr|G3MZC1|G3MZC1_B	5	12	12	12	27	62.965	5.01e-256	1022300000	771010000	942610000	9.11973e+08	504540000	536910000	818600000	6.20017e+08	0.679863	0.078569
F1MQQ8;W5QEN5;W5Q2W6;L8J456;F1N311;W5Q2X0;Q8HYW5	>tr|F1MQQ8|F1MQQ8_BOVIN Uncharacterized protein OS=Bos taurus GN=PPFIBP1 PE=4 SV=1;>tr|W5QEN5|W5QEN5_SHEEP Uncharacterized protein OS=Ovis aries GN=PPFIBP1 PE=4 SV=1	7	5	5	5	6	113.61	2.45e-31	12331000	15702000	16344000	1.47923e+07	24604000	18924000		21764000	1.4713	0.0787719
Q2HJB6;W5Q517;L8INS5	>tr|Q2HJB6|Q2HJB6_BOVIN Procollagen C-endopeptidase enhancer OS=Bos taurus GN=PCOLCE PE=2 SV=1;>tr|W5Q517|W5Q517_SHEEP Uncharacterized protein OS=Ovis aries GN=PCOLCE PE=4 SV=1;>tr|L8INS5|L8INS5_9CETA Procollagen C-endopeptidase enhancer 1 (Fragment) OS=Bo	3	6	6	6	19.1	48.21	2.25e-43	90623000	89873000	89424000	8.99733e+07	33644000	41459000	84352000	5.31517e+07	0.590749	0.0797735
W5NV12	>tr|W5NV12|W5NV12_SHEEP Uncharacterized protein OS=Ovis aries GN=CSPG4 PE=4 SV=1	1	38	3	3	20.3	250.48	0	22501000	25949000	27940000	2.54633e+07	51739000	39786000	30051000	4.05253e+07	1.59152	0.0804239
L8HXT3;L8I6T0;W5P0L8;Q3ZC55;F1MRD4;L8I3B9;Q0III9;W5P9P1;G3X7I1	>tr|L8HXT3|L8HXT3_9CETA Alpha-actinin-1 OS=Bos mutus GN=M91_10586 PE=4 SV=1	9	46	1	0	61	104.4	0	10549000	9219200	7905300	9224500	14956000	19265000	34076000	2.27657e+07	2.46796	0.0812684
W5Q4S0;F2X908	>tr|W5Q4S0|W5Q4S0_SHEEP Uncharacterized protein OS=Ovis aries GN=COL3A1 PE=4 SV=1	2	22	22	3	23.5	138.55	1.08e-121	511200000	617490000	1254400000	7.94363e+08	130710000	244390000	341740000	2.38947e+08	0.300803	0.0815947
L8HNK1;Q3MHP3;W5NWK8	>tr|L8HNK1|L8HNK1_9CETA Protein S100-A14 OS=Bos mutus GN=M91_03030 PE=4 SV=1;>sp|Q3MHP3|S10AE_BOVIN Protein S100-A14 OS=Bos taurus GN=S100A14 PE=3 SV=1;>tr|W5NWK8|W5NWK8_SHEEP Uncharacterized protein OS=Ovis aries GN=S100A14 PE=4 SV=1	3	5	5	5	51	11.41	9.62e-50	114730000	63817000	123870000	1.00806e+08	138970000	147410000	146950000	1.44443e+08	1.43289	0.0819296
L8I650	>tr|L8I650|L8I650_9CETA CD109 antigen (Fragment) OS=Bos mutus GN=M91_08921 PE=4 SV=1	1	15	15	0	14.5	157.56	9.95e-132	153180000	137940000	165110000	1.52077e+08	371060000	296710000	179270000	2.82347e+08	1.85661	0.0819801
Q0VCH9;W5PGU2;L8HUF3;W5PPT8	>tr|Q0VCH9|Q0VCH9_BOVIN GLI pathogenesis-related 2 OS=Bos taurus GN=GLIPR2 PE=2 SV=1;>tr|W5PGU2|W5PGU2_SHEEP Uncharacterized protein OS=Ovis aries PE=4 SV=1;>tr|L8HUF3|L8HUF3_9CETA Golgi-associated plant pathogenesis-related protein 1 (Fragment) OS=Bos mut	4	8	8	8	70.8	17.209	5.11e-187	981540000	916850000	1088200000	995530000	602080000	920810000	736080000	752990000	0.756371	0.0821153
W5QGJ0;Q3SYS6;W5QGJ2;L8I2D7	>tr|W5QGJ0|W5QGJ0_SHEEP Uncharacterized protein OS=Ovis aries GN=CHP1 PE=4 SV=1;>sp|Q3SYS6|CHP1_BOVIN Calcineurin B homologous protein 1 OS=Bos taurus GN=CHP1 PE=2 SV=1;>tr|W5QGJ2|W5QGJ2_SHEEP Uncharacterized protein OS=Ovis aries GN=CHP1 PE=4 SV=1;>tr|L8I	4	6	6	6	31.8	24.267	4.3e-16	74487000	75700000	118440000	8.95423e+07	125220000	134490000	115780000	1.25163e+08	1.39781	0.0821536
A0A0U1Z4T4;L8HPT1;P85100;W5PAN7;W5QD16;A0A0H3V7A0;A0A0U1Z4R2;A0JNJ5;Q08E10;L8J1J0;A0A0H3V384;A0A0U1Z4B7	>tr|A0A0U1Z4T4|A0A0U1Z4T4_SHEEP Myosin light chain 3 OS=Ovis aries GN=MYL3 PE=2 SV=1;>tr|L8HPT1|L8HPT1_9CETA Myosin light chain 3 OS=Bos mutus GN=M91_13703 PE=4 SV=1;>sp|P85100|MYL3_BOVIN Myosin light chain 3 OS=Bos taurus GN=MYL3 PE=1 SV=1;>tr|W5PAN7|W5PA	12	1	1	1	6	21.961	0.0020523	62187000	49242000	48057000	53162000	68723000	59729000	75848000	68100000	1.28099	0.0830543
A4IF81;F1N2T0;L8I490;Q2HJH4;W5NRR0;W5NWK4	>tr|A4IF81|A4IF81_BOVIN HNRPDL protein OS=Bos taurus GN=HNRPDL PE=2 SV=1;>tr|F1N2T0|F1N2T0_BOVIN Uncharacterized protein OS=Bos taurus GN=HNRNPDL PE=1 SV=1;>tr|L8I490|L8I490_9CETA Heterogeneous nuclear ribonucleoprotein D-like protein (Fragment) OS=Bos mut	6	2	1	1	5.7	46.405	5.04e-11	10665000	5811300		8238150	17998000	15786000		16892000	2.05046	0.0832847
A6QPJ6;L8HU53	>tr|A6QPJ6|A6QPJ6_BOVIN Peptidylprolyl isomerase OS=Bos taurus GN=FKBP7 PE=2 SV=1;>tr|L8HU53|L8HU53_9CETA Peptidylprolyl isomerase OS=Bos mutus GN=M91_18072 PE=4 SV=1	2	6	6	2	24.3	25.153	6.82e-14	20634000	23677000	26550000	2.36203e+07	18773000	16178000		17475500	0.73985	0.0837942
F1MB26;Q32LL7;F1MB25;O18956;W5P9T1	>tr|F1MB26|F1MB26_BOVIN Ectonucleoside triphosphate diphosphohydrolase 1 OS=Bos taurus GN=ENTPD1 PE=3 SV=1;>tr|Q32LL7|Q32LL7_BOVIN ENTPD1 protein OS=Bos taurus GN=ENTPD1 PE=2 SV=1;>tr|F1MB25|F1MB25_BOVIN Ectonucleoside triphosphate diphosphohydrolase 1 OS=	5	4	4	4	6.1	59.498	1.21e-06	45825000	22583000	44897000	3.77683e+07		65070000	110830000	87950000	2.32867	0.0838861
W5Q4M3	>tr|W5Q4M3|W5Q4M3_SHEEP Uncharacterized protein OS=Ovis aries GN=COL5A2 PE=4 SV=1	1	27	27	3	27.9	144.96	3.79e-277	482470000	272650000	548680000	434600000	18597000	109310000	326870000	1.51592e+08	0.348809	0.0839646
A0A068J2H8;A0A0N9SDG6;A0A161I3X6;A0A167X4M8;A0A192IC20;B2WWR3;B9ZUW8;C3TVS7;C3TVV3;W5S194	>tr|A0A068J2H8|A0A068J2H8_9CETA NADH-ubiquinone oxidoreductase chain 4L OS=Capricornis sp. HD-2014 GN=ND4L PE=3 SV=1;>tr|A0A0N9SDG6|A0A0N9SDG6_9CETA NADH-ubiquinone oxidoreductase chain 4L OS=Capricornis thar jamrachi GN=ND4L PE=3 SV=1;>tr|A0A161I3X6|A0A16	10	2	2	2	23.5	10.843	0.00017623	87207000	55293000	80553000	74351000	25268000	11366000	62445000	3.30263e+07	0.444195	0.0842838
G3X771;O02793;W5PWJ6;E1BLT5;L8I8S3;L8J0E3;W5P1I4;E1BGI0;B2M0T2;Q5S1S1	>tr|G3X771|G3X771_BOVIN Uncharacterized protein OS=Bos taurus GN=ABCB1 PE=4 SV=1;>tr|O02793|O02793_SHEEP Multidrug resistance protein-1 OS=Ovis aries GN=mdr1 PE=2 SV=1	10	13	13	1	12.7	141.87	9.78e-64	153410000	168900000	183850000	168720000	104540000	157710000	120420000	1.27557e+08	0.756026	0.0846539
L8I7X1	>tr|L8I7X1|L8I7X1_9CETA Glypican-1 (Fragment) OS=Bos mutus GN=M91_12476 PE=3 SV=1	1	11	1	0	30.1	53.578	1.74e-161		337080000	224050000	280565000	85465000	106550000		96007500	0.342193	0.0848637
F1N1W3;Q95116;L8HS89;Q28195;W5NQ50;W5NQ58	>tr|F1N1W3|F1N1W3_BOVIN Thrombospondin-2 OS=Bos taurus GN=THBS2 PE=4 SV=1;>sp|Q95116|TSP2_BOVIN Thrombospondin-2 OS=Bos taurus GN=THBS2 PE=2 SV=2;>tr|L8HS89|L8HS89_9CETA Thrombospondin-2 (Fragment) OS=Bos mutus GN=M91_09403 PE=4 SV=1	6	21	20	11	23.8	129.71	7.95e-118	70898000	257620000	237830000	1.88783e+08	25883000	49082000	77187000	5.07173e+07	0.268655	0.0865281
L8ILH3;Q3ZBF8;W5QI95	>tr|L8ILH3|L8ILH3_9CETA LAG1 longevity assurance-like protein 2 (Fragment) OS=Bos mutus GN=M91_14457 PE=4 SV=1;>sp|Q3ZBF8|CERS2_BOVIN Ceramide synthase 2 OS=Bos taurus GN=CERS2 PE=2 SV=1;>tr|W5QI95|W5QI95_SHEEP Uncharacterized protein OS=Ovis aries GN=CERS	3	3	3	3	8.7	45.059	7.94e-36	50844000	58376000	60890000	5.67033e+07	22598000	52286000	32877000	3.59203e+07	0.633478	0.087073
F6K451;L8IZG0;Q3MIC0;W5Q6M1;W5QEZ0;W5QDP9;W5PIU2	>tr|F6K451|F6K451_BUBBU Ribosomal protein L37a OS=Bubalus bubalis GN=RPL37a PE=2 SV=1;>tr|L8IZG0|L8IZG0_9CETA 60S ribosomal protein L37a (Fragment) OS=Bos mutus GN=M91_13912 PE=3 SV=1;>sp|Q3MIC0|RL37A_BOVIN 60S ribosomal protein L37a OS=Bos taurus GN=RPL37	7	4	4	4	50	10.275	8.63e-09	33405000	47276000	14751000	3.18107e+07	102420000	60498000		81459000	2.56074	0.0871388
W5PEV6;Q32PD5;E1BHA5;F6K453	>tr|W5PEV6|W5PEV6_SHEEP Uncharacterized protein OS=Ovis aries GN=RPS19 PE=4 SV=1;>sp|Q32PD5|RS19_BOVIN 40S ribosomal protein S19 OS=Bos taurus GN=RPS19 PE=2 SV=3;>tr|E1BHA5|E1BHA5_BOVIN 40S ribosomal protein S19 OS=Bos taurus GN=RPS19 PE=4 SV=1	4	9	9	9	49.7	17.39	3.67e-27	244180000	215180000	103650000	187670000	674460000	655820000	237340000	522540000	2.78436	0.0878815
L8IT58;Q3ZCA7;W5QD75;L8IB27;P08239;Q7M3H0;W5QD94;W5Q707;G5E5B6;L8I8K2;L8ISK6;P04696;P0C7Q4;L8IQW8;P04695;W5PL48;G8JKZ5;W5QB08;W5Q708;B7VGH3;I6ZQG6	>tr|L8IT58|L8IT58_9CETA Guanine nucleotide-binding protein G(K) subunit alpha OS=Bos mutus GN=M91_01620 PE=4 SV=1;>tr|Q3ZCA7|Q3ZCA7_BOVIN Guanine nucleotide binding protein (G protein), alpha inhibiting activity polypeptide 3 OS=Bos taurus GN=GNAI3 PE=2 SV	21	13	6	6	53.4	40.536	0	509650000	419370000	598850000	509290000	316300000	396640000	412600000	375180000	0.736673	0.0882507
W5P9G2;Q2KJC8;L8J0M6;A1L517	>tr|W5P9G2|W5P9G2_SHEEP Peptidylprolyl isomerase OS=Ovis aries GN=FKBP9 PE=4 SV=1;>sp|Q2KJC8|FKBP9_BOVIN Peptidyl-prolyl cis-trans isomerase FKBP9 OS=Bos taurus GN=FKBP9 PE=2 SV=1;>tr|L8J0M6|L8J0M6_9CETA Peptidylprolyl isomerase (Fragment) OS=Bos mutus GN=	4	15	15	14	31.5	63.265	1.93e-163	679600000	652950000	698190000	6.76913e+08	261570000	368140000	639360000	4.23023e+08	0.62493	0.0883852
Q5E9T9;W5Q9D9	>sp|Q5E9T9|RTCB_BOVIN tRNA-splicing ligase RtcB homolog OS=Bos taurus GN=RTCB PE=2 SV=1;>tr|W5Q9D9|W5Q9D9_SHEEP tRNA-splicing ligase RtcB homolog OS=Ovis aries GN=RTCB PE=3 SV=1	2	13	13	13	32.5	55.199	1.67e-46	87430000	79760000	71292000	79494000	206140000	148180000	97479000	1.506e+08	1.89448	0.0885632
L8IJJ5;O77642;Q0VC36;W5QAA1	>tr|L8IJJ5|L8IJJ5_9CETA 14-3-3 protein sigma OS=Bos mutus GN=M91_13415 PE=3 SV=1;>sp|O77642|1433S_SHEEP 14-3-3 protein sigma OS=Ovis aries GN=SFN PE=2 SV=1;>sp|Q0VC36|1433S_BOVIN 14-3-3 protein sigma OS=Bos taurus GN=SFN PE=2 SV=1;>tr|W5QAA1|W5QAA1_SHEEP 1	4	5	2	2	19.8	27.849	2.89e-11	6887800		67352000	37119900	122700000	172110000	93789000	129533000	3.48958	0.0886087
W5P8E9	>tr|W5P8E9|W5P8E9_SHEEP Uncharacterized protein OS=Ovis aries GN=CD109 PE=4 SV=1	1	15	2	1	15.2	161.28	8.91e-130	12277000		17178000	14727500	22879000	22087000		22483000	1.5266	0.0889825
W5PBL8;L8HR92;W5PBL5;E1BIP2	>tr|W5PBL8|W5PBL8_SHEEP Uncharacterized protein OS=Ovis aries GN=SLC44A1 PE=3 SV=1;>tr|L8HR92|L8HR92_9CETA Choline transporter-like protein 1 (Fragment) OS=Bos mutus GN=M91_03066 PE=3 SV=1;>tr|W5PBL5|W5PBL5_SHEEP Uncharacterized protein OS=Ovis aries GN=SL	4	8	8	8	16.2	73.407	4.99e-65	240450000	208560000	293320000	2.47443e+08	327780000	466900000	314310000	3.69663e+08	1.49393	0.0890918
W5QD50;W5QD51	>tr|W5QD50|W5QD50_SHEEP Uncharacterized protein OS=Ovis aries GN=CAD PE=3 SV=1;>tr|W5QD51|W5QD51_SHEEP Uncharacterized protein OS=Ovis aries GN=CAD PE=3 SV=1	2	14	14	3	8.1	242.67	6.55e-86	21073000	62626000	12773000	3.21573e+07	215440000	93791000		154615500	4.80809	0.0898124
Q1RMT6;W5P5J0	>tr|Q1RMT6|Q1RMT6_BOVIN Drebrin 1 OS=Bos taurus GN=DBN1 PE=1 SV=1;>tr|W5P5J0|W5P5J0_SHEEP Uncharacterized protein OS=Ovis aries GN=DBN1 PE=4 SV=1	2	19	19	19	34.4	72.16	3.45e-234	466060000	396480000	328780000	3.97107e+08	512100000	566220000	840140000	6.39487e+08	1.61036	0.0902349
L8IEG6;E1BIG6	>tr|L8IEG6|L8IEG6_9CETA Transferrin receptor protein 1 OS=Bos mutus GN=M91_13844 PE=4 SV=1;>tr|E1BIG6|E1BIG6_BOVIN Uncharacterized protein OS=Bos taurus GN=TFRC PE=4 SV=2	2	11	11	3	14.4	85.41	3.94e-55	143240000	320130000	312820000	258730000	143080000	131140000	113930000	1.29383e+08	0.500071	0.0911325
Q3SZN8;H9GW43	>tr|Q3SZN8|Q3SZN8_BOVIN Ribonuclease/angiogenin inhibitor 1 OS=Bos taurus GN=RNH1 PE=1 SV=1;>tr|H9GW43|H9GW43_BOVIN Uncharacterized protein OS=Bos taurus PE=1 SV=1	2	10	10	1	30.7	48.85	1.15e-144	205250000	391440000	198240000	2.64977e+08	108090000	153450000	98134000	1.19891e+08	0.45246	0.0911628
L8IQD7;F1MHN8;Q9BH13;W5QBM4	>tr|L8IQD7|L8IQD7_9CETA CD166 antigen (Fragment) OS=Bos mutus GN=M91_05498 PE=4 SV=1;>tr|F1MHN8|F1MHN8_BOVIN CD166 antigen OS=Bos taurus GN=ALCAM PE=4 SV=2;>sp|Q9BH13|CD166_BOVIN CD166 antigen OS=Bos taurus GN=ALCAM PE=2 SV=1;>tr|W5QBM4|W5QBM4_SHEEP Unchar	4	18	18	18	38.1	65.993	1.36e-204	1588500000	625520000	1526600000	1.24687e+09	278240000	360930000	785790000	4.74987e+08	0.380942	0.091228
W5QGS4;L8IKU4;A0A140T866;Q5EAD2	>tr|W5QGS4|W5QGS4_SHEEP D-3-phosphoglycerate dehydrogenase OS=Ovis aries GN=PHGDH PE=3 SV=1;>tr|L8IKU4|L8IKU4_9CETA D-3-phosphoglycerate dehydrogenase OS=Bos mutus GN=M91_04626 PE=3 SV=1;>tr|A0A140T866|A0A140T866_BOVIN D-3-phosphoglycerate dehydrogenase OS	4	9	9	9	20.7	56.739	3.77e-175	376830000	700640000	291200000	4.56223e+08	190160000	214730000	113170000	1.72687e+08	0.378513	0.0917742
W5PTW6;L8I8G2;A5D977;W5PTW5;G1DGF4	>tr|W5PTW6|W5PTW6_SHEEP Uncharacterized protein OS=Ovis aries GN=RALB PE=4 SV=1;>tr|L8I8G2|L8I8G2_9CETA Ras-related protein Ral-B (Fragment) OS=Bos mutus GN=M91_16209 PE=4 SV=1;>tr|A5D977|A5D977_BOVIN RALB protein OS=Bos taurus GN=RALB PE=2 SV=1;>tr|W5PTW5	5	9	9	6	39	25.846	2.56e-44	186820000	169270000	178460000	1.78183e+08	205420000	269430000	205080000	2.26643e+08	1.27197	0.0922239
L8IVF7;W5QHT6;Q1JQE6	>tr|L8IVF7|L8IVF7_9CETA Neutral cholesterol ester hydrolase 1 (Fragment) OS=Bos mutus GN=M91_03872 PE=4 SV=1;>tr|W5QHT6|W5QHT6_SHEEP Uncharacterized protein OS=Ovis aries GN=NCEH1 PE=4 SV=1;>sp|Q1JQE6|NCEH1_BOVIN Neutral cholesterol ester hydrolase 1 OS=Bo	3	9	9	9	27.2	49.111	8.3e-35	112950000	99192000	179350000	1.30497e+08	32434000	67157000	92193000	63928000	0.48988	0.0922836
W5PX37;L8IUJ3;Q0VCK9	>tr|W5PX37|W5PX37_SHEEP Uncharacterized protein OS=Ovis aries GN=VMP1 PE=4 SV=1;>tr|L8IUJ3|L8IUJ3_9CETA Transmembrane protein 49 OS=Bos mutus GN=M91_15749 PE=4 SV=1;>sp|Q0VCK9|VMP1_BOVIN Vacuole membrane protein 1 OS=Bos taurus GN=VMP1 PE=2 SV=1	3	4	4	4	14.1	49.977	6.75e-92	84777000	74494000	163780000	1.07684e+08	19123000	48259000	55462000	40948000	0.380262	0.0924973
L8IK69	>tr|L8IK69|L8IK69_9CETA Histone H2A OS=Bos mutus GN=M91_14430 PE=3 SV=1	1	3	3	1	59	8.567	3.37e-88	219510000	114770000		167140000	59460000	86466000	56298000	67408000	0.403303	0.0928458
W5P995;L8I5R8;E1BPX9	>tr|W5P995|W5P995_SHEEP Uncharacterized protein OS=Ovis aries GN=LRPPRC PE=4 SV=1;>tr|L8I5R8|L8I5R8_9CETA Leucine-rich PPR motif-containing protein, mitochondrial OS=Bos mutus GN=M91_11913 PE=4 SV=1;>tr|E1BPX9|E1BPX9_BOVIN Uncharacterized protein OS=Bos ta	3	6	6	6	4.3	158.37	9.01e-11	12204000	10897000	10182000	1.10943e+07	9551500		8092600	8822050	0.795185	0.0939413
L8J1N1;P00727;G3N0I4;W5NZQ2;M1R4S9	>tr|L8J1N1|L8J1N1_9CETA Cytosol aminopeptidase OS=Bos mutus GN=M91_14809 PE=3 SV=1;>sp|P00727|AMPL_BOVIN Cytosol aminopeptidase OS=Bos taurus GN=LAP3 PE=1 SV=3;>tr|G3N0I4|G3N0I4_BOVIN Cytosol aminopeptidase OS=Bos taurus GN=LAP3 PE=1 SV=1;>tr|W5NZQ2|W5NZQ2	5	9	9	9	20.8	56.29	4.4e-39	54923000	61685000	24206000	46938000	28386000	16070000	16806000	2.04207e+07	0.435056	0.0954793
Q3SWY4	>sp|Q3SWY4|LRN4L_BOVIN LRRN4 C-terminal-like protein OS=Bos taurus GN=LRRN4CL PE=2 SV=2	1	1	1	1	4.7	24.41	5.35e-07	51910000	71985000	32603000	52166000	202220000	184290000	63440000	1.49983e+08	2.87512	0.0956122
P21380	>sp|P21380|HBB_RANTA Hemoglobin subunit beta OS=Rangifer tarandus GN=HBB PE=1 SV=1	1	7	4	3	47.6	16.166	1.01e-54	16728000	9024700	24250000	1.66676e+07	69722000	350820000	165930000	1.95491e+08	11.7288	0.0963503
W5NYZ5	>tr|W5NYZ5|W5NYZ5_SHEEP Uncharacterized protein OS=Ovis aries GN=CANX PE=3 SV=1	1	27	27	4	46.4	67.79	0	3533800000	3182700000	4019000000	3578500000	1183400000	2151700000	3243900000	2193000000	0.612827	0.0973378
A0A173FDE6;Q30290;Q5E9C9;K7QEC9;H6V5G7;A0A173FDF7;Q3YFG0;Q3YFG5;A7YWH4;A0A173FDL2;A0A173FDG0;A0A173FDN0;A0A173FDE8;K7XTP1;E1BD63;W5NUE9;O78032;Q30254;A4ZVZ0;W5PYL7;F1MPL6;W5NY10;Q5EBS0;O46759;G9HQT6;G9HQT7;K7XZC8;K7YRV1;O46762;G9HQX4;Q2TQG1;Q2TQG6;Q2TQH0;Q2TQH1;Q2TQH6;Q2TQI2;Q2TQJ5;Q2TQK3;Q2TQM8;Q2TQN3;Q2TQN7;O46719;O46754;O46756;O46757;O46772;A0A0H5FRL0;A0A0H5FSL3;G9HQX5;G9HR12;G9HQS2;G9HQX7;G9H…	>tr|A0A173FDE6|A0A173FDE6_BOVIN Non-MHC class I antigen OS=Bos taurus GN=BoLA PE=2 SV=1;>tr|Q30290|Q30290_BOVIN MHC class 1 OS=Bos taurus GN=HD15 PE=2 SV=1;>tr|Q5E9C9|Q5E9C9_BOVIN Major histocompatibility complex, class I, A OS=Bos taurus GN=HLA-A PE=2 SV=	81	9	7	0	30.4	40.806	1.75e-96	121200000	122830000	117060000	1.20363e+08	68108000	52520000	116250000	7.89593e+07	0.656008	0.097978
L8I6V0;W5PTE0;W5PTE1;Q3ZBS3	>tr|L8I6V0|L8I6V0_9CETA AP-1 complex subunit sigma-2 OS=Bos mutus GN=M91_17837 PE=4 SV=1;>tr|W5PTE0|W5PTE0_SHEEP Uncharacterized protein OS=Ovis aries GN=AP1S2 PE=4 SV=1;>tr|W5PTE1|W5PTE1_SHEEP Uncharacterized protein OS=Ovis aries GN=AP1S2 PE=4 SV=1;>sp|Q	4	2	2	2	15.9	18.615	1.53e-23	19880000	19014000	23840000	2.09113e+07	27631000	46431000	28808000	34290000	1.63978	0.0993598
L8IGP2;F1MYG5;Q3SZI2;W5P640;Q862T1	>tr|L8IGP2|L8IGP2_9CETA Prelamin-A/C OS=Bos mutus GN=M91_20892 PE=3 SV=1;>tr|F1MYG5|F1MYG5_BOVIN Uncharacterized protein OS=Bos taurus GN=LMNA PE=1 SV=1;>tr|Q3SZI2|Q3SZI2_BOVIN Lamin A/C OS=Bos taurus GN=LMNA PE=2 SV=1;>tr|W5P640|W5P640_SHEEP Uncharacteriz	5	23	23	23	35.8	74.142	7.3e-94	77284000	33317000	49642000	5.34143e+07	323120000	157570000	690830000	3.90507e+08	7.3109	0.0999733
H6V5E5;A0A037;H9XGW5;K7QE74;Q3HWF0;K7QE81;A0A0S3Q262;O78034;O46748;O46753;O46726;O46737;O46749;O46746;Q3YJF7;G9HQR7;G9HQU7;G9HR10;A0A0H5FRK6;A0A0H5G9E2;Q2TQJ1;Q2TQJ9;Q2TQK8;Q2TQL1	>tr|H6V5E5|H6V5E5_BOVIN MHC class I antigen (Fragment) OS=Bos taurus GN=BoLA-N PE=3 SV=1;>tr|A0A037|A0A037_BISBI MHC class I alpha chain (Fragment) OS=Bison bison GN=Bibi-N PE=2 SV=1;>tr|H9XGW5|H9XGW5_BISBO MHC class I antigen (Fragment) OS=Bison bonasus G	24	9	3	0	30.1	39.856	1.51e-45	43412000	96197000	132220000	9.06097e+07	43849000	35332000	23440000	34207000	0.37752	0.100015
E1BA23;W5PNN0;W5PNN1	>tr|E1BA23|E1BA23_BOVIN Uncharacterized protein OS=Bos taurus GN=AMPD3 PE=4 SV=2;>tr|W5PNN0|W5PNN0_SHEEP Uncharacterized protein OS=Ovis aries GN=AMPD3 PE=4 SV=1;>tr|W5PNN1|W5PNN1_SHEEP Uncharacterized protein OS=Ovis aries GN=AMPD3 PE=4 SV=1	3	3	3	3	5.2	89.265	2.1e-09	4828000	6692300		5760150	11014000	8839200		9926600	1.72332	0.100645
W5PUF4;W5PUF5;L8ID14;E1BMC6;A6QP98	>tr|W5PUF4|W5PUF4_SHEEP Uncharacterized protein OS=Ovis aries GN=SLMAP PE=4 SV=1;>tr|W5PUF5|W5PUF5_SHEEP Uncharacterized protein OS=Ovis aries GN=SLMAP PE=4 SV=1;>tr|L8ID14|L8ID14_9CETA Sarcolemmal membrane-associated protein OS=Bos mutus GN=M91_00831 PE=4	5	21	21	21	23.3	97.003	7.01e-202	939470000	647400000	947380000	844750000	233310000	455120000	733200000	4.73877e+08	0.560967	0.10154
Q2KHT7;W5PMU0;L8HPS3;E1B7A8;L8IDB6;L8IH90;W5QHZ7;L8IQN5;Q3T0B7;W5NQC0;L8IMB0	>sp|Q2KHT7|RS27_BOVIN 40S ribosomal protein S27 OS=Bos taurus GN=RPS27 PE=3 SV=3;>tr|W5PMU0|W5PMU0_SHEEP Uncharacterized protein OS=Ovis aries GN=RPS27 PE=3 SV=1;>tr|L8HPS3|L8HPS3_9CETA 40S ribosomal protein S27 (Fragment) OS=Bos mutus GN=M91_03046 PE=3 SV	11	3	3	3	23.8	9.461	1.53e-10	65762000	93084000	42157000	67001000	172960000	136390000	82573000	130641000	1.94984	0.101941
W5PU19	>tr|W5PU19|W5PU19_SHEEP Terpene cyclase/mutase family member OS=Ovis aries GN=LSS PE=3 SV=1	1	7	7	2	12	83.202	2.86e-22	36792000	55217000	63181000	51730000	36679000	29872000	37010000	3.45203e+07	0.667317	0.102414
Q2KJ81;W5NPI3;L8I800;W5Q5B1;L8IXU0;Q3SYW1	>sp|Q2KJ81|AP1M1_BOVIN AP-1 complex subunit mu-1 OS=Bos taurus GN=AP1M1 PE=1 SV=3;>tr|W5NPI3|W5NPI3_SHEEP Uncharacterized protein OS=Ovis aries GN=AP1M1 PE=3 SV=1;>tr|L8I800|L8I800_9CETA AP-1 complex subunit mu-1 (Fragment) OS=Bos mutus GN=M91_13783 PE=3 S	6	13	13	13	42.8	48.586	3.41e-162	34036000	92499000	38306000	54947000	332560000	222680000	82385000	2.12542e+08	3.86812	0.102859
W5PNA4;A7MBF8;F1MEW4;L8HWN3;W5PNA9	>tr|W5PNA4|W5PNA4_SHEEP Cystathionine beta-synthase OS=Ovis aries GN=CBS PE=3 SV=1;>tr|A7MBF8|A7MBF8_BOVIN Cystathionine beta-synthase OS=Bos taurus GN=CBS PE=2 SV=1;>tr|F1MEW4|F1MEW4_BOVIN Cystathionine beta-synthase OS=Bos taurus GN=CBS PE=3 SV=1;>tr|L8H	5	7	7	7	14.9	64.185	3.72e-18	28615000	61156000	33152000	4.09743e+07	15308000	12196000	26131000	1.78783e+07	0.43633	0.104076
E1BBI6;G1DGH0;W5QC45	>tr|E1BBI6|E1BBI6_BOVIN Uncharacterized protein OS=Bos taurus GN=CCNYL1 PE=3 SV=1;>tr|G1DGH0|G1DGH0_CAPHI Cyclin-Y OS=Capra hircus GN=CCNY PE=2 SV=1;>tr|W5QC45|W5QC45_SHEEP Uncharacterized protein OS=Ovis aries GN=CCNYL1 PE=3 SV=1	3	6	6	5	19	41.127	3.01e-19	119620000	78974000	64070000	8.75547e+07	51109000	61434000	36245000	49596000	0.566458	0.104509
W5PQI3;D6BRG0;F1MTN1;L8HZQ7;J9ZW47;Q8MKD3;Q95JC4	>tr|W5PQI3|W5PQI3_SHEEP Integrin beta OS=Ovis aries GN=ITGB3 PE=3 SV=1;>tr|D6BRG0|D6BRG0_SHEEP Integrin beta (Fragment) OS=Ovis aries PE=2 SV=1;>tr|F1MTN1|F1MTN1_BOVIN Integrin beta OS=Bos taurus GN=ITGB3 PE=3 SV=1;>tr|L8HZQ7|L8HZQ7_9CETA Integrin beta (Fr	7	16	16	16	28	86.291	1.78e-107	161630000	138860000	98713000	1.33068e+08	259160000	224590000	149340000	211030000	1.58588	0.104634
L8I5S1;Q5E988;W5P114;A1XED5	>tr|L8I5S1|L8I5S1_9CETA 40S ribosomal protein S5 OS=Bos mutus GN=M91_05996 PE=3 SV=1;>sp|Q5E988|RS5_BOVIN 40S ribosomal protein S5 OS=Bos taurus GN=RPS5 PE=2 SV=3;>tr|W5P114|W5P114_SHEEP Uncharacterized protein OS=Ovis aries GN=RPS5 PE=3 SV=1;>tr|A1XED5|A1	4	7	7	7	32.8	22.876	1.03e-48	275290000	289820000	166960000	2.44023e+08	595650000	747260000	281480000	5.41463e+08	2.2189	0.105208
G5E505;H9CH14;L8HVY4;Q3SWY2;W5Q731	>tr|G5E505|G5E505_BOVIN Integrin-linked protein kinase OS=Bos taurus GN=ILK PE=4 SV=1;>tr|H9CH14|H9CH14_SHEEP Integrin-linked kinase OS=Ovis aries GN=ILK PE=2 SV=1;>tr|L8HVY4|L8HVY4_9CETA Integrin-linked protein kinase OS=Bos mutus GN=M91_19700 PE=4 SV=1;>	5	12	12	12	32.3	51.494	5.65e-52	71556000	81778000	66319000	7.32177e+07	206750000	145900000	86007000	146219000	1.99705	0.106403
E1BF59;W5Q3C2;L8IF65;W5NWV7	>tr|E1BF59|E1BF59_BOVIN Uncharacterized protein OS=Bos taurus GN=PLEC PE=1 SV=2	4	71	71	21	16.9	527.52	4.44e-204	139370000	129370000	98625000	122455000	234340000	332490000	718760000	428530000	3.49949	0.108082
W5PDT3;E1BIU0;W5PDT0;L8I7U1;G1DG59	>tr|W5PDT3|W5PDT3_SHEEP Uncharacterized protein OS=Ovis aries GN=SEC24C PE=4 SV=1;>tr|E1BIU0|E1BIU0_BOVIN Uncharacterized protein OS=Bos taurus GN=SEC24C PE=1 SV=1;>tr|W5PDT0|W5PDT0_SHEEP Uncharacterized protein OS=Ovis aries GN=SEC24C PE=4 SV=1;>tr|L8I7U1	5	18	18	18	21.6	117.97	5.05e-233	53609000	105390000	37522000	65507000	540180000	191000000		365590000	5.58093	0.108942
Q3T0U2;G8JKV5;L8ITS9;B0FZM0	>sp|Q3T0U2|RL14_BOVIN 60S ribosomal protein L14 OS=Bos taurus GN=RPL14 PE=2 SV=3;>tr|G8JKV5|G8JKV5_BOVIN 60S ribosomal protein L14 OS=Bos taurus GN=RPL14 PE=4 SV=1;>tr|L8ITS9|L8ITS9_9CETA 60S ribosomal protein L14 (Fragment) OS=Bos mutus GN=M91_15429 PE=4	4	4	4	4	21	23.436	1.13e-15	359390000	290450000	143320000	2.64387e+08	691320000	516060000	333720000	513700000	1.94299	0.109066
F1MVC0;L8ILN2	>tr|F1MVC0|F1MVC0_BOVIN Uncharacterized protein OS=Bos taurus GN=CAD PE=3 SV=2;>tr|L8ILN2|L8ILN2_9CETA CAD protein OS=Bos mutus GN=M91_00169 PE=3 SV=1	2	13	2	2	7.6	242.93	1.41e-75	12325000	31766000		22045500	62412000	47364000	37083000	48953000	2.22054	0.109646
L8IFG6;Q58DR5;E1BHS9	>tr|L8IFG6|L8IFG6_9CETA Secretory carrier-associated membrane protein OS=Bos mutus GN=M91_20872 PE=3 SV=1;>sp|Q58DR5|SCAM3_BOVIN Secretory carrier-associated membrane protein 3 OS=Bos taurus GN=SCAMP3 PE=2 SV=1;>tr|E1BHS9|E1BHS9_BOVIN Secretory carrier-ass	3	2	2	2	12.1	38.338	1.38e-25	41139000	48239000	30720000	4.00327e+07	46054000	55601000	54818000	5.21577e+07	1.30288	0.110653
L8J090;Q6Y1E2;W5PMH0	>tr|L8J090|L8J090_9CETA Proteolipid protein 2 OS=Bos mutus GN=M91_09843 PE=4 SV=1;>sp|Q6Y1E2|PLP2_BOVIN Proteolipid protein 2 OS=Bos taurus GN=PLP2 PE=2 SV=1;>tr|W5PMH0|W5PMH0_SHEEP Uncharacterized protein OS=Ovis aries PE=4 SV=1	3	1	1	1	8.6	16.645	3.36e-12	152200000	130210000	273560000	1.85323e+08	291700000		359310000	325505000	1.75642	0.111835
W5NU79;G3N2Y0;L8IBL5;Q3SZ59;W5NRQ6;F1MG09;G3N147;L8I496;G8JL02;L8J1U0;Q3ZCJ0	>tr|W5NU79|W5NU79_SHEEP Uncharacterized protein OS=Ovis aries GN=RPL36A PE=3 SV=1;>tr|G3N2Y0|G3N2Y0_BOVIN 60S ribosomal protein L36a OS=Bos taurus GN=RPL36A PE=3 SV=1;>tr|L8IBL5|L8IBL5_9CETA Uncharacterized protein (Fragment) OS=Bos mutus GN=M91_18895 PE=3	11	3	3	3	19.2	14.948	9.84e-08	82839000	133750000	60896000	92495000	173820000	144260000		159040000	1.71944	0.112897
F1N3A1;Q28178;L8J119;Q28194;Q9TS92;A6QQT1;F1MHQ8;L8ICS4;W5P162	>tr|F1N3A1|F1N3A1_BOVIN Thrombospondin-1 OS=Bos taurus GN=THBS1 PE=4 SV=1;>sp|Q28178|TSP1_BOVIN Thrombospondin-1 OS=Bos taurus GN=THBS1 PE=2 SV=2;>tr|L8J119|L8J119_9CETA Thrombospondin-1 (Fragment) OS=Bos mutus GN=M91_12734 PE=4 SV=1	9	47	47	2	51.3	129.39	0	1532700000	4135200000	3354700000	3.00753e+09	570680000	1066600000	2045300000	1.22753e+09	0.408151	0.114461
A0JN47;L8ICD2	>tr|A0JN47|A0JN47_BOVIN Plexin domain containing 2 OS=Bos taurus GN=PLXDC2 PE=2 SV=1;>tr|L8ICD2|L8ICD2_9CETA Plexin domain-containing protein 2 (Fragment) OS=Bos mutus GN=M91_08576 PE=4 SV=1	2	12	12	1	23.5	59.467	2.8e-73	256130000	334050000	345980000	3.12053e+08	114620000	175100000	290980000	1.93567e+08	0.6203	0.114645
A7MB97;L8IX73	>tr|A7MB97|A7MB97_BOVIN Protein YIPF OS=Bos taurus GN=YIPF2 PE=2 SV=1;>tr|L8IX73|L8IX73_9CETA Protein YIPF OS=Bos mutus GN=M91_04915 PE=3 SV=1	2	1	1	1	9	34.899	3.37e-95		22981000	13002000	17991500	28343000	24416000	28034000	26931000	1.49687	0.114943
W5PSK1	>tr|W5PSK1|W5PSK1_SHEEP Uncharacterized protein OS=Ovis aries GN=HYOU1 PE=3 SV=1	1	24	24	3	33	111.43	1.98e-240	640240000	509350000	874870000	674820000	186810000	345780000	567030000	366540000	0.543167	0.115159
A2VE11;F1MTR4;W5PED7	>tr|A2VE11|A2VE11_BOVIN IGSF8 protein OS=Bos taurus GN=IGSF8 PE=2 SV=1;>tr|F1MTR4|F1MTR4_BOVIN Uncharacterized protein OS=Bos taurus GN=IGSF8 PE=4 SV=1;>tr|W5PED7|W5PED7_SHEEP Uncharacterized protein OS=Ovis aries GN=IGSF8 PE=4 SV=1	3	2	2	2	3.3	64.402	0.00029491	9605500	8094900	9400800	9.03373e+06	12220000	18031000	10635000	1.36287e+07	1.50864	0.116116
Q0VCM4	>sp|Q0VCM4|PYGL_BOVIN Glycogen phosphorylase, liver form OS=Bos taurus GN=PYGL PE=2 SV=1	1	20	20	2	27.6	97.455	5.56e-116	77798000	66930000	14480000	5.30693e+07	275410000	159350000	81730000	1.72163e+08	3.24412	0.116241
L8IEN8;Q1RMH8;W5PMB1	>tr|L8IEN8|L8IEN8_9CETA Sorting nexin-3 OS=Bos mutus GN=M91_21176 PE=4 SV=1;>sp|Q1RMH8|SNX3_BOVIN Sorting nexin-3 OS=Bos taurus GN=SNX3 PE=2 SV=3;>tr|W5PMB1|W5PMB1_SHEEP Uncharacterized protein OS=Ovis aries GN=SNX3 PE=4 SV=1	3	4	4	4	25.9	18.762	2.55e-14	29733000	43696000	17942000	30457000	146440000	85056000	43915000	9.18037e+07	3.01421	0.116381
L8HKZ8;Q3ZC50;W5PVI0;F1MG07	>tr|L8HKZ8|L8HKZ8_9CETA Coiled-coil domain-containing protein 47 OS=Bos mutus GN=M91_15249 PE=4 SV=1;>sp|Q3ZC50|CCD47_BOVIN Coiled-coil domain-containing protein 47 OS=Bos taurus GN=CCDC47 PE=2 SV=1;>tr|W5PVI0|W5PVI0_SHEEP Uncharacterized protein OS=Ovis a	4	10	10	10	25.9	55.727	1.03e-64	62861000	61565000	82394000	68940000	16827000	47028000	58428000	40761000	0.591253	0.116729
W5NQ00;L8IDE5;F1N460;Q9MZ34	>tr|W5NQ00|W5NQ00_SHEEP Transporter OS=Ovis aries GN=SLC6A6 PE=3 SV=1;>tr|L8IDE5|L8IDE5_9CETA Transporter (Fragment) OS=Bos mutus GN=M91_13883 PE=3 SV=1;>tr|F1N460|F1N460_BOVIN Transporter OS=Bos taurus GN=SLC6A6 PE=3 SV=2;>sp|Q9MZ34|SC6A6_BOVIN Sodium- an	4	2	2	2	4.2	75.265	2.56e-12	43426000	34117000	28021000	35188000		15355000	25220000	20287500	0.576546	0.117955
W5PFQ8;C5IJ87;Q3SX43;W5P6H7;E1BGP6;L8I693;G5E5G3;Q17QM5;W5P6H8;G5E6C1	>tr|W5PFQ8|W5PFQ8_SHEEP Uncharacterized protein OS=Ovis aries GN=RRAGA PE=4 SV=1;>tr|C5IJ87|C5IJ87_SHEEP RRAGA OS=Ovis aries PE=2 SV=1;>sp|Q3SX43|RRAGA_BOVIN Ras-related GTP-binding protein A OS=Bos taurus GN=RRAGA PE=2 SV=1;>tr|W5P6H7|W5P6H7_SHEEP Unchara	10	4	4	4	15.3	36.665	4.06e-37	36795000	30746000	38532000	3.53577e+07	41908000	104530000	66961000	71133000	2.01181	0.123008
Q95M18;L8IEQ9;W5Q4E1;F6K456	>sp|Q95M18|ENPL_BOVIN Endoplasmin OS=Bos taurus GN=HSP90B1 PE=2 SV=1;>tr|L8IEQ9|L8IEQ9_9CETA Endoplasmin (Fragment) OS=Bos mutus GN=M91_11828 PE=3 SV=1;>tr|W5Q4E1|W5Q4E1_SHEEP Uncharacterized protein OS=Ovis aries GN=HSP90B1 PE=3 SV=1	4	35	35	34	46.6	92.426	0	3628500000	2750500000	4541200000	3.64007e+09	1344500000	2128900000	3156700000	2.21003e+09	0.607141	0.124175
W5PKL6;L8IF14;F2Z4C6;Q95L46;W6JQQ3;W6JR64;W6JR66;W6JR67;W6JRF8;W6JRF9;W6JRX2;W6JRX3;W6JX82;W6JX87;W6JQQ5	>tr|W5PKL6|W5PKL6_SHEEP Uncharacterized protein OS=Ovis aries GN=EIF4G2 PE=4 SV=1;>tr|L8IF14|L8IF14_9CETA Eukaryotic translation initiation factor 4 gamma 2 (Fragment) OS=Bos mutus GN=M91_06773 PE=4 SV=1;>tr|F2Z4C6|F2Z4C6_BOVIN Eukaryotic translation initi	15	15	15	15	19.2	105.94	1.04e-43	12345000	32460000	8843000	1.78827e+07	83671000	36569000		60120000	3.36191	0.124637
A7MBA2;L8J565;W5QHM6	>tr|A7MBA2|A7MBA2_BOVIN PSMD1 protein OS=Bos taurus GN=PSMD1 PE=1 SV=1;>tr|L8J565|L8J565_9CETA 26S proteasome non-ATPase regulatory subunit 1 (Fragment) OS=Bos mutus GN=M91_11013 PE=4 SV=1;>tr|W5QHM6|W5QHM6_SHEEP Uncharacterized protein OS=Ovis aries GN=PS	3	9	9	9	13.6	105.89	4.37e-35	55147000	58925000	33634000	4.92353e+07	41481000	18232000	27695000	29136000	0.59177	0.124716
A5D7E0;F1MSJ9;L8ITS7;W5PMX7;G1DGD1;L8IM57;Q17QB7;W5P6P9	>tr|A5D7E0|A5D7E0_BOVIN RAB35 protein OS=Bos taurus GN=RAB35 PE=2 SV=1;>tr|F1MSJ9|F1MSJ9_BOVIN Uncharacterized protein OS=Bos taurus GN=RAB35 PE=4 SV=2;>tr|L8ITS7|L8ITS7_9CETA Ras-related protein Rab-35 (Fragment) OS=Bos mutus GN=M91_11979 PE=4 SV=1	8	7	7	7	37.8	23.025	2.97e-113	77299000	76443000	94860000	8.28673e+07	86452000	107690000	112660000	1.02267e+08	1.23411	0.125218
W5QCP9	>tr|W5QCP9|W5QCP9_SHEEP Uncharacterized protein OS=Ovis aries GN=COL6A3 PE=4 SV=1	1	43	43	6	16	340.2	8.03e-194	206960000	395740000	348220000	3.16973e+08	509150000	407640000	411400000	442730000	1.39674	0.128188
W5PPH6;L8I4B2;Q3T169;Q862Q2;Q862E1;Q862D8;Q862I7;L8IR02;L8IN92;F6K452	>tr|W5PPH6|W5PPH6_SHEEP Uncharacterized protein OS=Ovis aries GN=RPS3 PE=3 SV=1;>tr|L8I4B2|L8I4B2_9CETA 40S ribosomal protein S3 OS=Bos mutus GN=M91_10010 PE=3 SV=1;>sp|Q3T169|RS3_BOVIN 40S ribosomal protein S3 OS=Bos taurus GN=RPS3 PE=2 SV=1;>tr|Q862Q2|Q8	10	15	15	15	60.9	31.046	2.57e-123	434830000	471680000	355440000	420650000	1119400000	971470000	415300000	835390000	1.98595	0.128651
L8ITJ7;Q29423;F1MQT9;Q0VD03;F1MHC3;Q9TQU9;Q9TQU8;Q9TTR5	>tr|L8ITJ7|L8ITJ7_9CETA CD44 antigen OS=Bos mutus GN=M91_01245 PE=4 SV=1;>sp|Q29423|CD44_BOVIN CD44 antigen OS=Bos taurus GN=CD44 PE=2 SV=1;>tr|F1MQT9|F1MQT9_BOVIN CD44 antigen OS=Bos taurus GN=CD44 PE=1 SV=2;>tr|Q0VD03|Q0VD03_BOVIN CD44 antigen OS=Bos tau	8	7	1	1	10.1	80.901	4.23e-36	72664000	124860000	108230000	101918000	163970000	111780000	160390000	145380000	1.42644	0.129434
L8HRD7;Q0VCM0;W5NRC1	>tr|L8HRD7|L8HRD7_9CETA Protein S100 OS=Bos mutus GN=M91_03029 PE=3 SV=1;>sp|Q0VCM0|S10AG_BOVIN Protein S100-A16 OS=Bos taurus GN=S100A16 PE=3 SV=1;>tr|W5NRC1|W5NRC1_SHEEP Protein S100 OS=Ovis aries GN=S100A16 PE=3 SV=1	3	3	3	3	32	11.776	5.97e-15	138640000	104290000	196100000	1.46343e+08	296480000	253660000	161790000	237310000	1.6216	0.130466
A7Z038;W5Q740	>tr|A7Z038|A7Z038_BOVIN ABCD3 protein OS=Bos taurus GN=ABCD3 PE=2 SV=1;>tr|W5Q740|W5Q740_SHEEP Uncharacterized protein OS=Ovis aries GN=ABCD3 PE=4 SV=1	2	4	4	4	9.1	75.358	1.61e-74	17423000	31877000	34822000	2.80407e+07		13347000	14030000	13688500	0.488166	0.130698
L8IF08;A7E307;W5Q1M9;A7E396	>tr|L8IF08|L8IF08_9CETA Putative ATP-dependent RNA helicase DDX17 (Fragment) OS=Bos mutus GN=M91_18833 PE=3 SV=1;>tr|A7E307|A7E307_BOVIN DDX17 protein OS=Bos taurus GN=DDX17 PE=1 SV=1;>tr|W5Q1M9|W5Q1M9_SHEEP Uncharacterized protein OS=Ovis aries GN=DDX17 P	4	9	5	5	13.1	80.437	1.51e-20	15021000	8400900	13940000	1.2454e+07	32932000	23979000	13871000	23594000	1.8945	0.130825
B0JYN6;P12763;L8HQH4;W5QH56;P29701	>tr|B0JYN6|B0JYN6_BOVIN Alpha-2-HS-glycoprotein OS=Bos taurus GN=AHSG PE=2 SV=1;>sp|P12763|FETUA_BOVIN Alpha-2-HS-glycoprotein OS=Bos taurus GN=AHSG PE=1 SV=2;>tr|L8HQH4|L8HQH4_9CETA Alpha-2-HS-glycoprotein OS=Bos mutus GN=M91_05077 PE=3 SV=1;>tr|W5QH56|W5	5	10	10	10	30.6	38.418	1.42e-130	662420000	669820000	232890000	521710000	332430000	224580000	117580000	2.24863e+08	0.431012	0.131967
P53712;J7H183;A0A140T8D2;B0FYY4;C7AR56;W5Q883;L8IYX5;Q95N86;Q2XTG2	>sp|P53712|ITB1_BOVIN Integrin beta-1 OS=Bos taurus GN=ITGB1 PE=1 SV=3;>tr|J7H183|J7H183_CAPHI Integrin beta OS=Capra hircus PE=2 SV=1;>tr|A0A140T8D2|A0A140T8D2_BOVIN Integrin beta OS=Bos taurus GN=ITGB1 PE=1 SV=1;>sp|B0FYY4|ITB1_SHEEP Integrin beta-1 OS=O	9	28	28	28	43.7	88.093	0	4022400000	3507200000	4532400000	4.02067e+09	2994000000	3637800000	3437100000	3356300000	0.834762	0.131977
L8IGD9;P12378;W5PQL0	>tr|L8IGD9|L8IGD9_9CETA UDP-glucose 6-dehydrogenase OS=Bos mutus GN=M91_02479 PE=3 SV=1;>sp|P12378|UGDH_BOVIN UDP-glucose 6-dehydrogenase OS=Bos taurus GN=UGDH PE=1 SV=2;>tr|W5PQL0|W5PQL0_SHEEP UDP-glucose 6-dehydrogenase OS=Ovis aries GN=UGDH PE=3 SV=1	3	9	9	9	24.7	55.164	6.78e-39	37457000	44027000		40742000	104640000	68206000		86423000	2.12123	0.13237
W5P303;L8I6Q4;A0A140T894;P68250;P68251	>tr|W5P303|W5P303_SHEEP 14-3-3 protein beta/alpha OS=Ovis aries GN=YWHAB PE=3 SV=1;>tr|L8I6Q4|L8I6Q4_9CETA 14-3-3 protein beta/alpha (Fragment) OS=Bos mutus GN=M91_07786 PE=3 SV=1;>tr|A0A140T894|A0A140T894_BOVIN 14-3-3 protein beta/alpha OS=Bos taurus GN=Y	5	13	8	8	48.9	32.05	4.34e-176	376050000	434900000	274450000	361800000	304180000	258590000	140910000	234560000	0.648314	0.132687
L8HV97;E1BLY1;G3N206;L8I2I0;L8IQG8;Q76I82;W5NS67;W5NSK6;W5P2W9;W5QF77;G3N3S3;L8IDP9;Q30B79;L8IA09;E1BK70;H9KUV3;L8IJ85;L8ILL3;W5P4J7;G1DG33;F4YD27;W5P7Q6	>tr|L8HV97|L8HV97_9CETA 40S ribosomal protein S15a (Fragment) OS=Bos mutus GN=M91_02772 PE=3 SV=1;>tr|E1BLY1|E1BLY1_BOVIN Uncharacterized protein OS=Bos taurus PE=3 SV=1;>tr|G3N206|G3N206_BOVIN Uncharacterized protein OS=Bos taurus PE=3 SV=1;>tr|L8I2I0|L8I	22	3	3	3	23.7	14.996	5.37e-10	90245000	76952000	41173000	6.94567e+07	155500000	137200000	75408000	1.22703e+08	1.76661	0.133221
A4FUC8	>tr|A4FUC8|A4FUC8_BOVIN CARS protein OS=Bos taurus GN=CARS PE=1 SV=1	1	5	5	2	6.7	94.132	2.77e-13	43020000	50836000	20967000	3.82743e+07	16416000	23044000	23362000	2.09407e+07	0.54712	0.133442
F2Z4E7;Q2T9Y9;W5NRN6;L8HNK5;W5QHT7	>tr|F2Z4E7|F2Z4E7_BOVIN Uncharacterized protein OS=Bos taurus GN=ILF2 PE=4 SV=1;>tr|Q2T9Y9|Q2T9Y9_BOVIN Interleukin enhancer binding factor 2, 45kDa OS=Bos taurus GN=ILF2 PE=2 SV=1;>tr|W5NRN6|W5NRN6_SHEEP Uncharacterized protein OS=Ovis aries GN=ILF2 PE=4	5	5	5	5	18.2	43.062	9.26e-13	18164000		11781000	14972500	7789400		4251700	6020550	0.402107	0.133636
L8HQ47;F1N3G9;W5PB86	>tr|L8HQ47|L8HQ47_9CETA Kin of IRRE-like protein 1 (Fragment) OS=Bos mutus GN=M91_20486 PE=4 SV=1;>tr|F1N3G9|F1N3G9_BOVIN Uncharacterized protein OS=Bos taurus GN=KIRREL PE=4 SV=2;>tr|W5PB86|W5PB86_SHEEP Uncharacterized protein OS=Ovis aries GN=KIRREL PE=4	3	7	7	7	13.6	83.098	3.66e-56	27050000	31130000	46624000	3.49347e+07	22675000	21543000	26138000	23452000	0.67131	0.133873
W5P5C4;F1MKH6;L8HQU8;Q2KJG3;Q30DW2;G3MXW8	>tr|W5P5C4|W5P5C4_SHEEP Uncharacterized protein OS=Ovis aries GN=NARS PE=4 SV=1;>tr|F1MKH6|F1MKH6_BOVIN Asparagine--tRNA ligase, cytoplasmic OS=Bos taurus GN=NARS PE=4 SV=1;>tr|L8HQU8|L8HQU8_9CETA Asparaginyl-tRNA synthetase, cytoplasmic OS=Bos mutus GN=M9	6	13	13	13	27.4	64.264	3.67e-139	185890000	184050000	75486000	1.48475e+08	72635000	103890000	34707000	7.04107e+07	0.474225	0.133954
F1MWK8	>tr|F1MWK8|F1MWK8_BOVIN Uncharacterized protein OS=Bos taurus GN=PTK7 PE=3 SV=2	1	25	4	4	29.8	118.08	1.52e-126	118040000	157750000	146420000	1.40737e+08	47253000	134210000	84236000	8.85663e+07	0.629305	0.134075
F1MJW5;W5Q1W7	>tr|F1MJW5|F1MJW5_BOVIN Uncharacterized protein OS=Bos taurus GN=PALLD PE=1 SV=2;>tr|W5Q1W7|W5Q1W7_SHEEP Uncharacterized protein OS=Ovis aries GN=PALLD PE=4 SV=1	2	11	11	6	11	125.18	1.6e-24	75133000	100450000	39303000	7.16287e+07	32251000	50586000	21811000	3.48827e+07	0.486993	0.134547
Q2YDL5;F1MT51;L8IK77;W5QCM9	>sp|Q2YDL5|FKB11_BOVIN Peptidyl-prolyl cis-trans isomerase FKBP11 OS=Bos taurus GN=FKBP11 PE=2 SV=1;>tr|F1MT51|F1MT51_BOVIN Peptidylprolyl isomerase OS=Bos taurus GN=FKBP11 PE=4 SV=1;>tr|L8IK77|L8IK77_9CETA Peptidylprolyl isomerase OS=Bos mutus GN=M91_0309	4	3	3	3	19.2	22.474	2.43e-31	289270000	155110000	329140000	257840000	51878000	91957000	219860000	1.21232e+08	0.470182	0.134828
W5PK71;L8J3J2;Q58CP2;G1DFY6	>tr|W5PK71|W5PK71_SHEEP Uncharacterized protein OS=Ovis aries GN=SUMF2 PE=4 SV=1;>tr|L8J3J2|L8J3J2_9CETA Sulfatase-modifying factor 2 (Fragment) OS=Bos mutus GN=M91_19493 PE=4 SV=1;>sp|Q58CP2|SUMF2_BOVIN Sulfatase-modifying factor 2 OS=Bos taurus GN=SUMF2	4	3	3	3	11.1	38.157	1.97e-19	16166000	31331000	27023000	24840000	15404000	17518000	16247000	1.63897e+07	0.659809	0.137062
E1BGJ0;A0A0A1GK11;W5PK39;W5QI85;W5QI86;F1MDE1;L8IYM7;W5Q190;L8J077	>tr|E1BGJ0|E1BGJ0_BOVIN Uncharacterized protein OS=Bos taurus GN=LRP1 PE=1 SV=2	9	133	133	17	38.2	504.76	0	4711500000	6240000000	8976500000	6.64267e+09	4554800000	4735100000	3227700000	4.17253e+09	0.628141	0.137948
W5PMG8;A4IF66;F1MIE0;L8IUT9;B0FY05	>tr|W5PMG8|W5PMG8_SHEEP Uncharacterized protein OS=Ovis aries GN=DDR2 PE=4 SV=1;>tr|A4IF66|A4IF66_BOVIN DDR2 protein OS=Bos taurus GN=DDR2 PE=2 SV=1;>tr|F1MIE0|F1MIE0_BOVIN Uncharacterized protein OS=Bos taurus GN=DDR2 PE=4 SV=1;>tr|L8IUT9|L8IUT9_9CETA Dis	5	7	7	7	9.8	97.554	2.29e-15	29575000	55425000	47267000	44089000	35569000	23653000	26221000	28481000	0.645989	0.138282
A6QQP7;F1MB01;W5PPG2	>sp|A6QQP7|DYSF_BOVIN Dysferlin OS=Bos taurus GN=DYSF PE=2 SV=1;>tr|F1MB01|F1MB01_BOVIN Dysferlin OS=Bos taurus GN=DYSF PE=4 SV=2;>tr|W5PPG2|W5PPG2_SHEEP Uncharacterized protein OS=Ovis aries GN=DYSF PE=4 SV=1	3	4	1	1	1.9	239.31	1.31e-12	13971000		8936000	11453500		5225900	5566300	5396100	0.471131	0.138391
F2Z4J5;Q3ZC12;W5Q0G0;L8HPE6;A6YLM4	>tr|F2Z4J5|F2Z4J5_BOVIN Eukaryotic translation initiation factor 3 subunit G OS=Bos taurus GN=EIF3G PE=3 SV=1;>sp|Q3ZC12|EIF3G_BOVIN Eukaryotic translation initiation factor 3 subunit G OS=Bos taurus GN=EIF3G PE=2 SV=1;>tr|W5Q0G0|W5Q0G0_SHEEP Eukaryotic tr	5	7	7	7	21.2	35.611	6.2e-32	21739000	46367000	18919000	2.90083e+07	163620000	58208000		110914000	3.82352	0.138747
P05028;Q3ZCH8	>sp|P05028|AT1B1_SHEEP Sodium/potassium-transporting ATPase subunit beta-1 OS=Ovis aries GN=ATP1B1 PE=2 SV=1	2	7	7	1	28.1	35.071	2.77e-50	1012100000	617570000	1040100000	8.89923e+08	581390000	743020000	480040000	6.01483e+08	0.675882	0.138989
E1BMF2;L8ICX7;W5QG63	>tr|E1BMF2|E1BMF2_BOVIN Uncharacterized protein OS=Bos taurus GN=ZMPSTE24 PE=4 SV=2;>tr|L8ICX7|L8ICX7_9CETA CAAX prenyl protease 1-like protein OS=Bos mutus GN=M91_13358 PE=4 SV=1;>tr|W5QG63|W5QG63_SHEEP Uncharacterized protein OS=Ovis aries GN=ZMPSTE24 PE	3	6	6	6	16.6	54.678	2.5e-108	124760000	81154000	147090000	117668000	17389000	59240000	102960000	59863000	0.508745	0.139329
K7YRU7;F6RF06;Q2TBV8;Q0PNG1;A4ZVX3;A4ZVX0;A4ZVY1;A4ZVY4;A4ZVW8;A4ZVY5	>tr|K7YRU7|K7YRU7_ELADA MHC class I antigen OS=Elaphurus davidianus GN=Elda-F1 PE=2 SV=1;>tr|F6RF06|F6RF06_BOVIN Uncharacterized protein OS=Bos taurus GN=BOLA PE=3 SV=1;>tr|Q2TBV8|Q2TBV8_BOVIN MHC class I heavy chain OS=Bos taurus GN=BOLA PE=2 SV=1	10	9	9	1	28.3	40.965	2.26e-50	218980000	277660000	397310000	2.97983e+08	173140000	201130000	220420000	198230000	0.665239	0.139732
C0SQ70;W5NQ96	>tr|C0SQ70|C0SQ70_BOVIN Plexin domain containing 2 OS=Bos taurus GN=plxdc2 PE=2 SV=1;>tr|W5NQ96|W5NQ96_SHEEP Uncharacterized protein OS=Ovis aries GN=PLXDC2 PE=4 SV=1	2	12	1	1	23.3	59.214	1.17e-69	22976000	41560000	47828000	3.74547e+07	10893000	23473000	28078000	2.08147e+07	0.55573	0.140098
W5QBD7;A0A097C2Z1;P63103;W5P3B5;L8J3H9;H9CJU6;P29361;Q7M332;E1BDS9;L8HR13;H2E6Z8;Q3KRV6	>tr|W5QBD7|W5QBD7_SHEEP 14-3-3 protein zeta/delta OS=Ovis aries GN=YWHAZ PE=3 SV=1;>tr|A0A097C2Z1|A0A097C2Z1_CAPHI Tyrosine 3-monooxygenase/tryptophan 5-monooxygenase activation protein zeta polypeptide (Fragment) OS=Capra hircus GN=YWHAZ PE=2 SV=1;>sp|P63	12	14	11	10	55.9	27.941	0	845280000	870990000	535650000	750640000	658400000	470770000	307450000	4.78873e+08	0.637953	0.140113
E1BPX2;L8I200;W5Q2D8	>tr|E1BPX2|E1BPX2_BOVIN Uncharacterized protein OS=Bos taurus GN=EDIL3 PE=4 SV=1;>tr|L8I200|L8I200_9CETA EGF-like repeat and discoidin I-like domain-containing protein 3 (Fragment) OS=Bos mutus GN=M91_16978 PE=4 SV=1;>tr|W5Q2D8|W5Q2D8_SHEEP Uncharacterized	3	11	11	11	25.4	53.719	1.29e-78	181030000	108900000	275810000	188580000	34952000	98378000	127070000	86800000	0.460282	0.140411
L8HSZ8;F1MUC1;W5NS36;W5NS35;L8HSG6;G3MW08;G3MW11;L8I8Q4;W5NTF9;G3MW09;L8IDP5;L8J2G2;W5NU30;G3MW12;W5NSB7;W5NTH1;L8IEJ6;L8ISF5;W5NTE5;W5NVB5	>tr|L8HSZ8|L8HSZ8_9CETA Multidrug resistance-associated protein 4 OS=Bos mutus GN=M91_14137 PE=4 SV=1;>tr|F1MUC1|F1MUC1_BOVIN Uncharacterized protein OS=Bos taurus GN=ABCC4 PE=4 SV=2;>tr|W5NS36|W5NS36_SHEEP Uncharacterized protein OS=Ovis aries GN=ABCC4 PE	20	18	18	17	17.5	149.39	1.35e-73	99793000	73931000	206620000	1.26781e+08	44250000	77519000	14481000	4.54167e+07	0.358228	0.141527
Q2KHU8;W5Q6E7;G3MWU5;C0KTL0	>sp|Q2KHU8|IF2G_BOVIN Eukaryotic translation initiation factor 2 subunit 3 OS=Bos taurus GN=EIF2S3 PE=2 SV=1;>tr|W5Q6E7|W5Q6E7_SHEEP Uncharacterized protein OS=Ovis aries GN=EIF2S3 PE=4 SV=1;>tr|G3MWU5|G3MWU5_BOVIN Uncharacterized protein OS=Bos taurus PE=	4	9	9	6	23.7	51.065	5.13e-44	52743000	77891000	28844000	5.31593e+07	153160000	81520000		117340000	2.20733	0.141576
L8IT00;W5PEW4;Q3SX02	>tr|L8IT00|L8IT00_9CETA Oxidoreductase HTATIP2 OS=Bos mutus GN=M91_05365 PE=4 SV=1;>tr|W5PEW4|W5PEW4_SHEEP Uncharacterized protein OS=Ovis aries GN=HTATIP2 PE=4 SV=1;>tr|Q3SX02|Q3SX02_BOVIN HIV-1 Tat interactive protein 2, 30kDa OS=Bos taurus GN=HTATIP2 PE	3	2	2	2	7.5	30.684	1.92e-05	24640000	14511000	26209000	2.17867e+07	12469000	12378000		12423500	0.570234	0.142285
A0A060INS8;Q3T0I2;W5PZ47;L8IXK1;W5PZ48	>tr|A0A060INS8|A0A060INS8_CAPHI Cathepsin H OS=Capra hircus PE=2 SV=1;>sp|Q3T0I2|CATH_BOVIN Pro-cathepsin H OS=Bos taurus GN=CTSH PE=2 SV=1;>tr|W5PZ47|W5PZ47_SHEEP Uncharacterized protein OS=Ovis aries GN=CTSH PE=3 SV=1;>tr|L8IXK1|L8IXK1_9CETA Cathepsin H	5	1	1	1	3.3	37.387	0.0038011		7764900	10408000	9086450	17356000	20465000	11156000	1.63257e+07	1.7967	0.142883
P11017;W5Q438;L8IRX4	>sp|P11017|GBB2_BOVIN Guanine nucleotide-binding protein G(I)/G(S)/G(T) subunit beta-2 OS=Bos taurus GN=GNB2 PE=2 SV=3;>tr|W5Q438|W5Q438_SHEEP Uncharacterized protein OS=Ovis aries GN=GNB2 PE=4 SV=1;>tr|L8IRX4|L8IRX4_9CETA Guanine nucleotide-binding protei	3	12	6	3	43.5	37.331	2.44e-257	1079500000	949250000	1168100000	1.06562e+09	617670000	900760000	984080000	834170000	0.782805	0.144408
L8I7P8;Q3ZC41;W5NS74	>tr|L8I7P8|L8I7P8_9CETA 3-ketoacyl-CoA thiolase, peroxisomal OS=Bos mutus GN=M91_20975 PE=3 SV=1;>tr|Q3ZC41|Q3ZC41_BOVIN Acetyl-Coenzyme A acyltransferase 1 OS=Bos taurus GN=ACAA1 PE=1 SV=1;>tr|W5NS74|W5NS74_SHEEP Uncharacterized protein OS=Ovis aries GN=A	3	5	5	5	15.1	44.302	6.79e-72	91753000	82305000	74659000	8.29057e+07	85830000	23828000	13950000	4.12027e+07	0.496983	0.144437
W5PN85;Q29RZ0;L8I1W8	>tr|W5PN85|W5PN85_SHEEP Uncharacterized protein OS=Ovis aries GN=ACAT1 PE=3 SV=1;>sp|Q29RZ0|THIL_BOVIN Acetyl-CoA acetyltransferase, mitochondrial OS=Bos taurus GN=ACAT1 PE=2 SV=1;>tr|L8I1W8|L8I1W8_9CETA Acetyl-CoA acetyltransferase, mitochondrial (Fragmen	3	5	5	5	17.3	45.449	1.52e-56	28847000		30825000	29836000		20677000	25928000	23302500	0.78102	0.145267
A6H7J6;L8HYQ8;W5Q9H2;P05307;G9BHW9;G9BHX0	>tr|A6H7J6|A6H7J6_BOVIN Protein disulfide-isomerase OS=Bos taurus GN=P4HB PE=1 SV=1;>tr|L8HYQ8|L8HYQ8_9CETA Protein disulfide-isomerase OS=Bos mutus GN=M91_17341 PE=3 SV=1;>tr|W5Q9H2|W5Q9H2_SHEEP Protein disulfide-isomerase OS=Ovis aries GN=P4HB PE=3 SV=1;	6	27	27	27	63.1	57.203	0	3276900000	2644900000	3859900000	3.26057e+09	1339800000	1721600000	3163000000	2074800000	0.636331	0.145289
P56652;Q9TRI0	>sp|P56652|ITIH3_BOVIN Inter-alpha-trypsin inhibitor heavy chain H3 OS=Bos taurus GN=ITIH3 PE=1 SV=2	2	18	18	2	25.6	99.55	1.11e-110	449830000	3054600000	1777800000	1.76074e+09	526030000	339860000	333560000	3.99817e+08	0.227073	0.145653
A2VDZ9;W5Q6Q7;L8J358;Q861V1;L8HKX8	>sp|A2VDZ9|VAPB_BOVIN Vesicle-associated membrane protein-associated protein B OS=Bos taurus GN=VAPB PE=2 SV=1;>tr|W5Q6Q7|W5Q6Q7_SHEEP Uncharacterized protein OS=Ovis aries GN=VAPB PE=4 SV=1;>tr|L8J358|L8J358_9CETA Vesicle-associated membrane protein-assoc	5	6	5	5	30.9	27.158	1.06e-24	31865000	53181000	65662000	50236000	32979000	37549000	18111000	2.95463e+07	0.588151	0.145854
A7MB15;L8I824;W5Q571;Q1MW17;W5PFR4;G3N2W8;F1N4K7;L8HWH3;W5Q7X7;Q68RG1	>tr|A7MB15|A7MB15_BOVIN FZD1 protein OS=Bos taurus GN=FZD1 PE=2 SV=1;>tr|L8I824|L8I824_9CETA Frizzled-1 (Fragment) OS=Bos mutus GN=M91_06209 PE=3 SV=1;>tr|W5Q571|W5Q571_SHEEP Uncharacterized protein OS=Ovis aries GN=FZD1 PE=3 SV=1	10	7	7	7	10.9	70.854	3.79e-18	48981000	26581000	44041000	3.98677e+07	22557000	22934000		22745500	0.570525	0.146033
P23709;W5PB27;F1MS25;L8IG75	>sp|P23709|NDUS3_BOVIN NADH dehydrogenase [ubiquinone] iron-sulfur protein 3, mitochondrial OS=Bos taurus GN=NDUFS3 PE=1 SV=1;>tr|W5PB27|W5PB27_SHEEP Uncharacterized protein OS=Ovis aries GN=NDUFS3 PE=1 SV=1;>tr|F1MS25|F1MS25_BOVIN NADH dehydrogenase [ubiq	4	2	2	2	9.8	30.284	5.84e-14	54397000	42874000	77164000	58145000	24070000		37765000	30917500	0.531731	0.146451
Q2NKZ1;W5PQF0;F1MWR8;L8I7D0	>sp|Q2NKZ1|TCPH_BOVIN T-complex protein 1 subunit eta OS=Bos taurus GN=CCT7 PE=1 SV=1;>tr|W5PQF0|W5PQF0_SHEEP Uncharacterized protein OS=Ovis aries GN=CCT7 PE=3 SV=1;>tr|F1MWR8|F1MWR8_BOVIN T-complex protein 1 subunit eta OS=Bos taurus GN=CCT7 PE=3 SV=2;>t	4	20	20	20	45.1	59.442	4.61e-237	827410000	711700000	569330000	7.02813e+08	586050000	596700000	452920000	5.45223e+08	0.775773	0.147129
F1MLG1;L8HUE3;W5PF02	>tr|F1MLG1|F1MLG1_BOVIN Uncharacterized protein OS=Bos taurus GN=SRPRB PE=1 SV=2;>tr|L8HUE3|L8HUE3_9CETA Signal recognition particle receptor subunit beta OS=Bos mutus GN=M91_11917 PE=4 SV=1;>tr|W5PF02|W5PF02_SHEEP Uncharacterized protein OS=Ovis aries GN=	3	10	10	10	43.9	29.716	4.82e-61	231240000	118760000	188350000	179450000	17296000	143890000	108320000	8.98353e+07	0.500615	0.14725
F1MY84;L8IUZ7	>tr|F1MY84|F1MY84_BOVIN Uncharacterized protein OS=Bos taurus GN=CSPG4 PE=4 SV=2;>tr|L8IUZ7|L8IUZ7_9CETA Chondroitin sulfate proteoglycan 4 (Fragment) OS=Bos mutus GN=M91_06842 PE=4 SV=1	2	41	41	6	21.9	250.53	0	368480000	585390000	487020000	4.80297e+08	1019300000	945600000	466500000	8.10467e+08	1.68743	0.14768
W5NRX8;Q148J1;L8J0H8	>tr|W5NRX8|W5NRX8_SHEEP Tetraspanin OS=Ovis aries GN=TSPAN7 PE=3 SV=1;>tr|Q148J1|Q148J1_BOVIN Tetraspanin OS=Bos taurus GN=TSPAN7 PE=2 SV=1;>tr|L8J0H8|L8J0H8_9CETA Tetraspanin (Fragment) OS=Bos mutus GN=M91_17202 PE=3 SV=1	3	2	2	2	8.8	27.559	3.19e-26	7481200	4537300	15511000	9176500	20865000	15599000	12794000	1.64193e+07	1.78928	0.147743
A3KMY8;W5PKU3;W5NU07;L8IVJ7	>tr|A3KMY8|A3KMY8_BOVIN Beta-glucuronidase OS=Bos taurus GN=GUSB PE=2 SV=1	4	8	8	8	11.3	74.469	7.54e-21	27549000	33025000	48906000	3.64933e+07	57682000	39629000	65601000	54304000	1.48805	0.149626
W5Q6N7;L8HU00;F1MKS3;G3MZD8	>tr|W5Q6N7|W5Q6N7_SHEEP Uncharacterized protein OS=Ovis aries GN=TXNDC5 PE=4 SV=1;>tr|L8HU00|L8HU00_9CETA Thioredoxin domain-containing protein 5 (Fragment) OS=Bos mutus GN=M91_00017 PE=4 SV=1;>tr|F1MKS3|F1MKS3_BOVIN Uncharacterized protein OS=Bos taurus P	4	10	10	10	36.3	38.366	3.17e-231	334640000	317000000	360460000	3.37367e+08	140390000	218120000	338510000	232340000	0.688687	0.149654
A2VDN7;W5P4I9;F1MFT4;Q08DH6	>tr|A2VDN7|A2VDN7_BOVIN Heterogeneous nuclear ribonucleoprotein U (Scaffold attachment factor A) OS=Bos taurus GN=HNRNPU PE=2 SV=1;>tr|W5P4I9|W5P4I9_SHEEP Uncharacterized protein OS=Ovis aries GN=HNRNPU PE=4 SV=1;>tr|F1MFT4|F1MFT4_BOVIN Uncharacterized pro	4	12	12	12	18.5	90.451	1.49e-119	94910000	54776000	56164000	6.86167e+07	133870000	200550000	75956000	136792000	1.99357	0.149877
Q56JU9;W5PIY3;L8IB75;W5NZX5;L8HUE7;L8HYY2;F4YD28;W5PA04	>sp|Q56JU9|RS24_BOVIN 40S ribosomal protein S24 OS=Bos taurus GN=RPS24 PE=2 SV=2;>tr|W5PIY3|W5PIY3_SHEEP 40S ribosomal protein S24 OS=Ovis aries GN=RPS24 PE=3 SV=1;>tr|L8IB75|L8IB75_9CETA 40S ribosomal protein S24 (Fragment) OS=Bos mutus GN=M91_13891 PE=3	8	4	4	4	35.1	15.197	4.78e-25	70574000	78224000	36445000	6.17477e+07	180920000	169510000	56852000	1.35761e+08	2.19864	0.149999
E1BE25;L8HYW2	>tr|E1BE25|E1BE25_BOVIN Uncharacterized protein OS=Bos taurus GN=FLNC PE=1 SV=1;>tr|L8HYW2|L8HYW2_9CETA Filamin-C OS=Bos mutus GN=M91_00879 PE=4 SV=1	2	63	50	9	30.2	290.78	0	340710000	185750000	191900000	2.39453e+08	667640000	320370000	367790000	4.51933e+08	1.88735	0.151171
L8IXW5;A0A140T8C6;A1L555;F1MXP8;P26779	>tr|L8IXW5|L8IXW5_9CETA Proactivator polypeptide OS=Bos mutus GN=M91_14720 PE=4 SV=1;>tr|A0A140T8C6|A0A140T8C6_BOVIN Prosaposin OS=Bos taurus GN=PSAP PE=1 SV=1;>tr|A1L555|A1L555_BOVIN Prosaposin OS=Bos taurus GN=PSAP PE=2 SV=1;>tr|F1MXP8|F1MXP8_BOVIN Prosa	5	11	11	2	22.2	58.9	6.72e-114	249130000	255160000	333020000	2.79103e+08	341320000	341740000	551070000	4.11377e+08	1.47392	0.152102
E1BPT8;W5P1F6;L8I4N5	>tr|E1BPT8|E1BPT8_BOVIN Uncharacterized protein OS=Bos taurus GN=NOTCH3 PE=4 SV=2;>tr|W5P1F6|W5P1F6_SHEEP Uncharacterized protein OS=Ovis aries GN=NOTCH3 PE=4 SV=1;>tr|L8I4N5|L8I4N5_9CETA Uncharacterized protein (Fragment) OS=Bos mutus GN=M91_00985 PE=4 SV	3	2	1	1	0.8	244.37	4.87e-06	21208000	17656000	18015000	1.89597e+07	49343000	24429000		36886000	1.9455	0.152524
W5NYX6;L8IUE8;C8BKE5;Q3ZCE2;F4YD12	>tr|W5NYX6|W5NYX6_SHEEP ELAV-like protein OS=Ovis aries GN=ELAVL1 PE=3 SV=1;>tr|L8IUE8|L8IUE8_9CETA ELAV-like protein (Fragment) OS=Bos mutus GN=M91_08707 PE=3 SV=1;>tr|C8BKE5|C8BKE5_SHEEP ELAV-like protein OS=Ovis aries GN=ELAVL1 PE=2 SV=1;>tr|Q3ZCE2|Q3ZC	5	6	6	6	18.9	37.537	5.16e-16	4603700	6743000	10887000	7.41123e+06	60170000	16858000		38514000	5.19671	0.152687
L8IVQ9;A4FV50;W5NQK6;Q2KJ33;L8IPB0	>tr|L8IVQ9|L8IVQ9_9CETA LIM and senescent cell antigen-like-containing domain protein OS=Bos mutus GN=M91_19253 PE=4 SV=1;>tr|A4FV50|A4FV50_BOVIN LIM and senescent cell antigen-like-containing domain protein OS=Bos taurus GN=MGC142792 PE=2 SV=1;>tr|W5NQK6|	5	8	8	8	25.7	41.61	3.72e-34	32279000	32393000	32009000	32227000	140070000	92182000	31097000	87783000	2.7239	0.152907
Q0VCX4;W5NY24;K7XKB6;M4WGF1	>sp|Q0VCX4|CTNB1_BOVIN Catenin beta-1 OS=Bos taurus GN=CTNNB1 PE=1 SV=1;>tr|W5NY24|W5NY24_SHEEP Uncharacterized protein OS=Ovis aries GN=CTNNB1 PE=4 SV=1;>tr|K7XKB6|K7XKB6_SHEEP Beta-catenin 1 OS=Ovis aries PE=2 SV=1;>tr|M4WGF1|M4WGF1_SHEEP Catenin (Cadher	4	33	33	2	52.9	85.51	0	1047400000	904360000	1191000000	1.04759e+09	775410000	979310000	849120000	8.67947e+08	0.82852	0.152948
Q9N2I2;L8ILP6	>sp|Q9N2I2|IPSP_BOVIN Plasma serine protease inhibitor OS=Bos taurus GN=SERPINA5 PE=1 SV=1;>tr|L8ILP6|L8ILP6_9CETA Plasma serine protease inhibitor OS=Bos mutus GN=M91_13739 PE=3 SV=1	2	6	6	2	19.8	45.296	1.97e-26	13528000	8733100	22921000	15060700	20330000	22559000	35425000	2.61047e+07	1.7333	0.153687
Q3T0M0;W5Q645;G3X6P5;L8IA72;W5Q644	>sp|Q3T0M0|VPS29_BOVIN Vacuolar protein sorting-associated protein 29 OS=Bos taurus GN=VPS29 PE=2 SV=1;>tr|W5Q645|W5Q645_SHEEP Vacuolar protein sorting-associated protein 29 OS=Ovis aries GN=VPS29 PE=3 SV=1;>tr|G3X6P5|G3X6P5_BOVIN Vacuolar protein sorting-	5	3	3	3	17.2	20.917	2.78e-10	16052000	15389000		15720500	60422000	32891000		46656500	2.96788	0.153703
P02465;L8HQF7;F2X909;A9P555	>sp|P02465|CO1A2_BOVIN Collagen alpha-2(I) chain OS=Bos taurus GN=COL1A2 PE=1 SV=2;>tr|L8HQF7|L8HQF7_9CETA Collagen alpha-2(I) chain OS=Bos mutus GN=M91_14202 PE=4 SV=1	4	50	48	6	54.3	129.06	0	2741000000	2356000000	3505900000	2.86763e+09	868720000	1682400000	2721000000	1.75737e+09	0.612831	0.154626
Q07130;W5QFN9;L8I7H2	>sp|Q07130|UGPA_BOVIN UTP--glucose-1-phosphate uridylyltransferase OS=Bos taurus GN=UGP2 PE=1 SV=2;>tr|W5QFN9|W5QFN9_SHEEP Uncharacterized protein OS=Ovis aries GN=UGP2 PE=4 SV=1;>tr|L8I7H2|L8I7H2_9CETA UTP--glucose-1-phosphate uridylyltransferase (Fragmen	3	4	4	4	10.6	56.903	1.1e-18	35813000	45044000	32663000	37840000	30520000	25882000		28201000	0.74527	0.155042
W5PB39;F1N206;L8HP78	>tr|W5PB39|W5PB39_SHEEP Dihydrolipoyl dehydrogenase OS=Ovis aries GN=DLD PE=4 SV=1;>tr|F1N206|F1N206_BOVIN Dihydrolipoyl dehydrogenase OS=Bos taurus GN=DLD PE=1 SV=2;>tr|L8HP78|L8HP78_9CETA Dihydrolipoyl dehydrogenase (Fragment) OS=Bos mutus GN=M91_17803 P	3	7	7	7	18.3	54.169	8.24e-35	21076000	15593000	20198000	1.89557e+07	13594000	16611000	16398000	1.55343e+07	0.819509	0.155593
X2GM95	>tr|X2GM95|X2GM95_CERNI Serum albumin (Fragment) OS=Cervus nippon PE=2 SV=1	1	23	10	9	42.2	66.149	3.8e-102	138150000	159730000	62922000	1.20267e+08	84893000	51095000	62698000	6.62287e+07	0.550679	0.155964
W5QFP1;A4IFC3;L8J2M6	>tr|W5QFP1|W5QFP1_SHEEP Polyadenylate-binding protein OS=Ovis aries GN=PABPC4 PE=3 SV=1;>tr|A4IFC3|A4IFC3_BOVIN Polyadenylate-binding protein OS=Bos taurus GN=PABPC4 PE=2 SV=1	3	13	8	7	19.7	72.312	1.4e-51	36280000	37691000	15289000	2.97533e+07	63541000	57573000	31678000	5.09307e+07	1.71176	0.15681
Q3ZCD7;L8J3K8;W5P5P4;W5NWS0;W5NWS5	>sp|Q3ZCD7|TECR_BOVIN Very-long-chain enoyl-CoA reductase OS=Bos taurus GN=TECR PE=2 SV=1;>tr|L8J3K8|L8J3K8_9CETA Trans-2,3-enoyl-CoA reductase OS=Bos mutus GN=M91_00838 PE=4 SV=1	5	6	6	6	17.5	36.072	5.4e-20	66297000	147150000	174150000	129199000	39212000	78873000	84966000	6.76837e+07	0.523871	0.157576
L8IQ77;E1BJ59;W5NWX5;W5NWW9;Q307F0	>tr|L8IQ77|L8IQ77_9CETA Ataxin-2-like protein OS=Bos mutus GN=M91_15169 PE=4 SV=1;>tr|E1BJ59|E1BJ59_BOVIN Uncharacterized protein OS=Bos taurus GN=ATXN2L PE=4 SV=1;>tr|W5NWX5|W5NWX5_SHEEP Uncharacterized protein OS=Ovis aries GN=ATXN2L PE=4 SV=1;>tr|W5NWW9	5	7	7	7	7.1	115.53	2.38e-19	10996000	17586000	4654200	1.10787e+07	50919000	28195000	13681000	3.09317e+07	2.79199	0.158285
W5QHW1;A4FUX9;F1MDA6;L8IKS5	>tr|W5QHW1|W5QHW1_SHEEP Uncharacterized protein OS=Ovis aries GN=VPS45 PE=3 SV=1;>tr|A4FUX9|A4FUX9_BOVIN VPS45 protein OS=Bos taurus GN=VPS45 PE=2 SV=1;>tr|F1MDA6|F1MDA6_BOVIN Uncharacterized protein OS=Bos taurus GN=VPS45 PE=3 SV=1;>tr|L8IKS5|L8IKS5_9CETA	4	1	1	1	2.1	65.604	7.41e-09		6550800	7302000	6926400	10712000	9108200	7611100	9.14377e+06	1.32013	0.159126
W5QAL0;L8IXR9;Q28034	>tr|W5QAL0|W5QAL0_SHEEP Uncharacterized protein OS=Ovis aries GN=PRKCSH PE=4 SV=1;>tr|L8IXR9|L8IXR9_9CETA Glucosidase 2 subunit beta OS=Bos mutus GN=M91_04897 PE=4 SV=1;>sp|Q28034|GLU2B_BOVIN Glucosidase 2 subunit beta OS=Bos taurus GN=PRKCSH PE=2 SV=1	3	7	7	7	16.8	60.479	2.73e-157	233520000	239960000	309460000	260980000	86584000	139560000	261490000	1.62545e+08	0.622824	0.160412
Q28009;A0A140T861;L8J1R4;W5NVY0;L8IBG4;W5NPG9;E1BGX1;W5P667	>sp|Q28009|FUS_BOVIN RNA-binding protein FUS OS=Bos taurus GN=FUS PE=2 SV=2;>tr|A0A140T861|A0A140T861_BOVIN RNA-binding protein FUS OS=Bos taurus GN=FUS PE=4 SV=1;>tr|L8J1R4|L8J1R4_9CETA RNA-binding protein FUS (Fragment) OS=Bos mutus GN=M91_19514 PE=4 SV=	8	5	5	5	14.2	52.31	1.02e-38	28274000	67830000	26280000	4.07947e+07	168060000	140390000	34794000	1.14415e+08	2.80465	0.160522
W5PGZ3;E1BAP4;W5PQQ1	>tr|W5PGZ3|W5PGZ3_SHEEP Uncharacterized protein OS=Ovis aries GN=LOC101118415 PE=4 SV=1;>tr|E1BAP4|E1BAP4_BOVIN Uncharacterized protein OS=Bos taurus GN=STEAP1 PE=4 SV=1;>tr|W5PQQ1|W5PQQ1_SHEEP Uncharacterized protein OS=Ovis aries GN=STEAP1 PE=4 SV=1	3	5	5	5	9.5	43.615	6.41e-13	47696000	34435000	74656000	5.22623e+07	22155000	41854000	23666000	29225000	0.559198	0.161174
E1BJ20;G1DG14;L8J5P1;Q3SZ32;W5NQ92;G3MXN8	>tr|E1BJ20|E1BJ20_BOVIN Uncharacterized protein OS=Bos taurus PE=4 SV=1;>tr|G1DG14|G1DG14_CAPHI Transcription elongation factor B polypeptide 2 OS=Capra hircus GN=TCEB2 PE=2 SV=1;>tr|L8J5P1|L8J5P1_9CETA Transcription elongation factor B polypeptide 2 (Frag	6	2	2	2	18.6	13.196	3.78e-06	28040000	28393000	19686000	25373000	20408000	21269000	19581000	2.04193e+07	0.804766	0.161304
L8HR42;P00515;W5Q3N5	>tr|L8HR42|L8HR42_9CETA cAMP-dependent protein kinase type II-alpha regulatory subunit OS=Bos mutus GN=M91_16954 PE=4 SV=1;>sp|P00515|KAP2_BOVIN cAMP-dependent protein kinase type II-alpha regulatory subunit OS=Bos taurus GN=PRKAR2A PE=1 SV=2;>tr|W5Q3N5|W5	3	3	3	3	10.5	47.263	3.12e-165	15993000	20681000	11938000	16204000	27035000	20457000		23746000	1.46544	0.161648
A6QLG5;W5NXM4;L8HNQ1;W5PMD7	>sp|A6QLG5|RS9_BOVIN 40S ribosomal protein S9 OS=Bos taurus GN=RPS9 PE=2 SV=1;>tr|W5NXM4|W5NXM4_SHEEP Uncharacterized protein OS=Ovis aries GN=RPS9 PE=3 SV=1;>tr|L8HNQ1|L8HNQ1_9CETA 40S ribosomal protein S9 (Fragment) OS=Bos mutus GN=M91_02034 PE=3 SV=1;>t	4	10	10	10	39.2	22.591	5.88e-25	465150000	504270000	256810000	4.08743e+08	821550000	939400000	397200000	7.19383e+08	1.75999	0.162469
A5D7A2;L8IXJ0;W5PDU8;Q6Q138	>tr|A5D7A2|A5D7A2_BOVIN GARS protein OS=Bos taurus GN=GARS PE=1 SV=1;>tr|L8IXJ0|L8IXJ0_9CETA Glycyl-tRNA synthetase OS=Bos mutus GN=M91_19654 PE=4 SV=1;>tr|W5PDU8|W5PDU8_SHEEP Uncharacterized protein OS=Ovis aries GN=GARS PE=4 SV=1;>tr|Q6Q138|Q6Q138_BOVIN	4	19	19	19	31.4	83.117	1.48e-262	390740000	443750000	195430000	3.43307e+08	250320000	185820000	193240000	2.09793e+08	0.611096	0.162976
W5P3N0;F1MHV5;Q3ZBD9;H9TKZ6;W5P3M3;W5Q1F2	>tr|W5P3N0|W5P3N0_SHEEP Uncharacterized protein OS=Ovis aries GN=DNMT3B PE=4 SV=1;>tr|F1MHV5|F1MHV5_BOVIN Microtubule-associated protein RP/EB family member 1 OS=Bos taurus GN=MAPRE1 PE=4 SV=2;>sp|Q3ZBD9|MARE1_BOVIN Microtubule-associated protein RP/EB fam	6	4	4	4	16.8	32.514	3.34e-55	12545000	13600000		13072500	32152000	20120000		26136000	1.99931	0.163002
F1N4V5;L8ILF6;W5PW51;E1BMF6;W5PAV4;L8IT06;W5PAV2;A5PKE3	>tr|F1N4V5|F1N4V5_BOVIN Uncharacterized protein OS=Bos taurus GN=NAA15 PE=4 SV=2;>tr|L8ILF6|L8ILF6_9CETA N-alpha-acetyltransferase 15, NatA auxiliary subunit OS=Bos mutus GN=M91_09216 PE=4 SV=1;>tr|W5PW51|W5PW51_SHEEP Uncharacterized protein OS=Ovis aries	8	3	3	3	3.7	101.15	1.75e-07	3494200	3898900		3696550	19914000	9653400		14783700	3.99932	0.163435
W5P5C1;Q5EA68;L8J3G8;W5P5C3	>tr|W5P5C1|W5P5C1_SHEEP Uncharacterized protein OS=Ovis aries GN=SEC61A1 PE=3 SV=1;>sp|Q5EA68|S61A1_BOVIN Protein transport protein Sec61 subunit alpha isoform 1 OS=Bos taurus GN=SEC61A1 PE=2 SV=3;>tr|L8J3G8|L8J3G8_9CETA Protein transport protein Sec61 sub	4	7	7	3	13.3	53.131	1.78e-18	364650000	249400000	628750000	4.14267e+08	137800000	265890000	232750000	2.12147e+08	0.512102	0.16372
A5D7B7;L8IGJ9;W5P8E3	>sp|A5D7B7|SEPR_BOVIN Prolyl endopeptidase FAP OS=Bos taurus GN=FAP PE=1 SV=1;>tr|L8IGJ9|L8IGJ9_9CETA Seprase (Fragment) OS=Bos mutus GN=M91_05758 PE=4 SV=1;>tr|W5P8E3|W5P8E3_SHEEP Uncharacterized protein OS=Ovis aries GN=FAP PE=3 SV=1	3	20	20	20	28.8	87.733	1.05e-84	214800000	85257000	123770000	1.41276e+08	255520000	157690000	316940000	2.43383e+08	1.72275	0.165156
W5QGA4;Q56JY1;W5PFD9;L8HQN6;W5P9T5;L8I0K5;W5PM22;W5P770;L8I357;E1BMJ8;E1BHM9;L8IK83;Q30B83;L8J4Y2	>tr|W5QGA4|W5QGA4_SHEEP Uncharacterized protein OS=Ovis aries GN=RPL35A PE=4 SV=1;>sp|Q56JY1|RL35A_BOVIN 60S ribosomal protein L35a OS=Bos taurus GN=RPL35A PE=3 SV=1;>tr|W5PFD9|W5PFD9_SHEEP Uncharacterized protein OS=Ovis aries PE=4 SV=1;>tr|L8HQN6|L8HQN6_	14	7	7	7	51.8	12.767	3.66e-15	342900000	263670000	186490000	2.64353e+08	497150000	574530000	257040000	4.42907e+08	1.67543	0.166468
P02453;L8IV51;Q95ND8;A6YLM2;Q862R9;Q862S4;B6E305;B6E311;Q95ND9;W5P6V2	>sp|P02453|CO1A1_BOVIN Collagen alpha-1(I) chain OS=Bos taurus GN=COL1A1 PE=1 SV=3;>tr|L8IV51|L8IV51_9CETA Collagen alpha-1(I) chain OS=Bos mutus GN=M91_15600 PE=4 SV=1	10	60	60	5	63.2	138.94	0	5880700000	4215000000	8074200000	6.05663e+09	1412500000	3296500000	5367100000	3358700000	0.554549	0.166586
W5PC77	>tr|W5PC77|W5PC77_SHEEP Uncharacterized protein OS=Ovis aries GN=INF2 PE=4 SV=1	1	3	1	1	4.7	134.81	8.82e-12	8237700	8435500		8336600	13714000	10268000		11991000	1.43836	0.168416
F1MJ56;Q17R14	>tr|F1MJ56|F1MJ56_BOVIN Unconventional myosin-Id OS=Bos taurus GN=MYO1D PE=3 SV=1;>sp|Q17R14|MYO1D_BOVIN Unconventional myosin-Id OS=Bos taurus GN=MYO1D PE=2 SV=1	2	45	45	2	50.6	115.91	0	1029400000	606990000	918450000	8.51613e+08	825980000	1502500000	1679400000	1335960000	1.56874	0.169243
Q3ZC87;A5D984;L8IGN1;W5P275;Q1JPG7;W5P276;A0A158URV7;A0A158UVK7;A0A158UX35;A0A158V0I8;A0A161AL99;Q3S331;A0N018	>tr|Q3ZC87|Q3ZC87_BOVIN Pyruvate kinase (Fragment) OS=Bos taurus GN=PKM2 PE=2 SV=1;>tr|A5D984|A5D984_BOVIN Pyruvate kinase OS=Bos taurus GN=PKM2 PE=1 SV=1	13	36	36	0	66.4	61.427	0	4139000000	4807300000	3533200000	4.15983e+09	12651000000	10401000000	3438300000	8830100000	2.12271	0.170334
W5PUH4;W5PUH7;Q9TTY8;L8I3F2;W5PTW1	>tr|W5PUH4|W5PUH4_SHEEP Uncharacterized protein OS=Ovis aries GN=GSTP1 PE=3 SV=1;>tr|W5PUH7|W5PUH7_SHEEP Uncharacterized protein OS=Ovis aries GN=GSTP1 PE=3 SV=1;>sp|Q9TTY8|GSTP1_CAPHI Glutathione S-transferase P OS=Capra hircus GN=GSTP1 PE=2 SV=2	5	4	4	2	26.6	23.997	4.28e-25	76931000	85083000	51093000	7.10357e+07	48887000	45526000		47206500	0.664546	0.170773
W5P9P0;W5P9P2;E1BPK6;L8IF47	>tr|W5P9P0|W5P9P0_SHEEP Uncharacterized protein OS=Ovis aries GN=MYO6 PE=3 SV=1;>tr|W5P9P2|W5P9P2_SHEEP Uncharacterized protein OS=Ovis aries GN=MYO6 PE=3 SV=1	4	4	4	4	4.1	148.64	1.42e-27	8708900	15173000	12637000	1.2173e+07	16683000	16379000		16531000	1.35801	0.170828
Q3T0S6;W5PSW9;L8I1G8;E1BHY4	>sp|Q3T0S6|RL8_BOVIN 60S ribosomal protein L8 OS=Bos taurus GN=RPL8 PE=2 SV=3;>tr|W5PSW9|W5PSW9_SHEEP Uncharacterized protein OS=Ovis aries GN=RPL8 PE=3 SV=1;>tr|L8I1G8|L8I1G8_9CETA 60S ribosomal protein L8 (Fragment) OS=Bos mutus GN=M91_14937 PE=4 SV=1	4	8	8	8	36.2	28.024	3.62e-143	196920000	330810000	214220000	2.47317e+08	531660000	497930000	231270000	4.20287e+08	1.69939	0.171276
F1MT37;L8I0X0;Q2KJ80;W5PPJ2	>tr|F1MT37|F1MT37_BOVIN Uncharacterized protein OS=Bos taurus GN=VPS33A PE=3 SV=1;>tr|L8I0X0|L8I0X0_9CETA Vacuolar protein sorting-associated protein 33A OS=Bos mutus GN=M91_06145 PE=3 SV=1;>tr|Q2KJ80|Q2KJ80_BOVIN Vacuolar protein sorting 33 homolog A (S.	4	1	1	1	2.7	67.506	8.72e-35	3267600	4269400		3768500	5953200	6192700	11219000	7788300	2.06668	0.17164
W5QC35;Q307F8	>tr|W5QC35|W5QC35_SHEEP Protein disulfide-isomerase OS=Ovis aries GN=PDIA4 PE=3 SV=1	2	15	3	3	24.4	72.53	6.89e-100	18759000	33943000	19679000	24127000	15276000	16399000	16193000	15956000	0.661334	0.172593
A6QLZ0;L8HZB8;W5QIW1	>tr|A6QLZ0|A6QLZ0_BOVIN Galectin OS=Bos taurus GN=LGALS3 PE=1 SV=1;>tr|L8HZB8|L8HZB8_9CETA Galectin (Fragment) OS=Bos mutus GN=M91_04102 PE=4 SV=1	3	5	5	5	18.1	27.646	1.62e-42	244700000	162730000	107640000	171690000	2161400000	795600000	308730000	1.08858e+09	6.34036	0.174444
Q0VCX5;L8IRU7;W5P2U4;W5Q4S6	>sp|Q0VCX5|ERF1_BOVIN Eukaryotic peptide chain release factor subunit 1 OS=Bos taurus GN=ETF1 PE=2 SV=3;>tr|L8IRU7|L8IRU7_9CETA Eukaryotic peptide chain release factor subunit 1 (Fragment) OS=Bos mutus GN=M91_11412 PE=4 SV=1;>tr|W5P2U4|W5P2U4_SHEEP Unchara	4	6	6	6	18.3	49.03	2.05e-25	19068000	34661000	25631000	2.64533e+07	51298000	33193000		42245500	1.59698	0.174815
G3MXE7;W5P5M4;L8IJA9	>tr|G3MXE7|G3MXE7_BOVIN Uncharacterized protein OS=Bos taurus GN=HEPH PE=3 SV=1;>tr|W5P5M4|W5P5M4_SHEEP Uncharacterized protein OS=Ovis aries GN=HEPH PE=3 SV=1;>tr|L8IJA9|L8IJA9_9CETA Hephaestin (Fragment) OS=Bos mutus GN=M91_15301 PE=4 SV=1	3	10	10	10	10.2	130.5	2.8e-33	126630000	64353000	81962000	9.09817e+07	32982000	51208000	77396000	53862000	0.592009	0.175481
P61286;L8J5R8;W5NPI6;B0LRP4;B0FZM8;E1BNB4;L8I4C8;W5P398;Q862M1	>sp|P61286|PABP1_BOVIN Polyadenylate-binding protein 1 OS=Bos taurus GN=PABPC1 PE=2 SV=1;>tr|L8J5R8|L8J5R8_9CETA Polyadenylate-binding protein (Fragment) OS=Bos mutus GN=M91_19633 PE=3 SV=1;>tr|W5NPI6|W5NPI6_SHEEP Polyadenylate-binding protein OS=Ovis arie	9	21	21	15	38.4	70.67	1.93e-74	138300000	169190000	34670000	1.14053e+08	628400000	464830000	78017000	3.90416e+08	3.4231	0.175665
P31717;F1MZK0;Q32LK5;W5PIM7;W5QFE1;L8I2Y4;Q8MKE3;G3N0U1;Q9N181;W5PDU4;Q9GL39;Q2KIZ5	>sp|P31717|NMT1_BOVIN Glycylpeptide N-tetradecanoyltransferase 1 OS=Bos taurus GN=NMT1 PE=1 SV=2;>tr|F1MZK0|F1MZK0_BOVIN Glycylpeptide N-tetradecanoyltransferase OS=Bos taurus GN=NMT1 PE=3 SV=1;>tr|Q32LK5|Q32LK5_BOVIN Glycylpeptide N-tetradecanoyltransfera	12	6	6	6	15.7	56.919	6.93e-26	15302000	47824000	14089000	2.57383e+07	93736000	79610000	23196000	65514000	2.54539	0.175819
F1MMK8;Q3T0N2;W5PAG0	>tr|F1MMK8|F1MMK8_BOVIN Lysine--tRNA ligase OS=Bos taurus GN=KARS PE=1 SV=1;>tr|Q3T0N2|Q3T0N2_BOVIN Lysine--tRNA ligase OS=Bos taurus GN=KARS PE=2 SV=1;>tr|W5PAG0|W5PAG0_SHEEP Lysine--tRNA ligase OS=Ovis aries GN=KARS PE=3 SV=1	3	7	7	7	10.9	71.346	7.6e-24	52768000	54704000	35722000	4.77313e+07	42539000	36600000	27173000	3.54373e+07	0.742433	0.176915
Q07DX2;Q09YJ1;Q09YK2;L8IFR4;Q66WT7	>sp|Q07DX2|CAV2_MUNRE Caveolin-2 OS=Muntiacus reevesi GN=CAV2 PE=3 SV=1;>sp|Q09YJ1|CAV2_SHEEP Caveolin-2 OS=Ovis aries GN=CAV2 PE=3 SV=1;>sp|Q09YK2|CAV2_MUNMU Caveolin-2 OS=Muntiacus muntjak GN=CAV2 PE=3 SV=1;>tr|L8IFR4|L8IFR4_9CETA Caveolin OS=Bos mutus G	5	6	6	6	48.8	18.146	7.99e-31	112060000	41556000	158200000	1.03939e+08	35490000	46413000	59979000	47294000	0.455018	0.177417
W5PTE6	>tr|W5PTE6|W5PTE6_SHEEP Uncharacterized protein OS=Ovis aries GN=TMEM2 PE=4 SV=1	1	7	7	2	5.3	154.79	2.07e-18	30923000	17193000	44629000	30915000	7561000	11778000	26058000	1.51323e+07	0.489482	0.178981
F1MSD2;Q2TBU9;W5PSP7;L8IJU2	>tr|F1MSD2|F1MSD2_BOVIN RuvB-like helicase OS=Bos taurus GN=RUVBL2 PE=3 SV=1;>sp|Q2TBU9|RUVB2_BOVIN RuvB-like 2 OS=Bos taurus GN=RUVBL2 PE=2 SV=3;>tr|W5PSP7|W5PSP7_SHEEP RuvB-like helicase OS=Ovis aries GN=RUVBL2 PE=3 SV=1;>tr|L8IJU2|L8IJU2_9CETA RuvB-like	4	9	9	9	22.9	51.142	8.06e-27	27561000	44666000	23613000	3.19467e+07	56497000	42064000		49280500	1.54259	0.17906
F1N2H6;Q0KIZ6	>tr|F1N2H6|F1N2H6_BOVIN Uncharacterized protein OS=Bos taurus GN=CD276 PE=4 SV=2;>tr|Q0KIZ6|Q0KIZ6_BOVIN CD276 antigen (Fragment) OS=Bos taurus GN=Cd276 PE=2 SV=1	2	3	1	1	13.3	56.477	9.52e-21	65500000	102710000	73657000	8.06223e+07	54941000	74055000	35676000	5.48907e+07	0.680837	0.179155
W5Q0C6;L8I4L3;Q08E54;Q28053;Q28757	>tr|W5Q0C6|W5Q0C6_SHEEP Amyloid beta A4 protein OS=Ovis aries GN=APP PE=4 SV=1;>tr|L8I4L3|L8I4L3_9CETA Amyloid beta A4 protein (Fragment) OS=Bos mutus GN=M91_03351 PE=4 SV=1;>tr|Q08E54|Q08E54_BOVIN Amyloid beta (A4) protein OS=Bos taurus GN=APP PE=2 SV=1	5	12	12	11	19.5	86.925	5.73e-63	34485000	289400000	150730000	158205000	57079000	36560000	17126000	3.69217e+07	0.233379	0.17923
O46412;V5LTF3;P09670;F1MNQ4;J9QN81;P00442;Q52RN5;L8ISB7;Q861T4;Q9TS96;Q5FB29;B9VGZ6;F8UTU4;G8FRI7;A4URH1	>sp|O46412|SODC_CEREL Superoxide dismutase [Cu-Zn] OS=Cervus elaphus GN=SOD1 PE=2 SV=3;>tr|V5LTF3|V5LTF3_CERNI Cu/Zn superoxide dismutase (Fragment) OS=Cervus nippon PE=2 SV=1;>sp|P09670|SODC_SHEEP Superoxide dismutase [Cu-Zn] OS=Ovis aries GN=SOD1 PE=1 SV	15	4	4	4	35.5	15.829	7.89e-13	21332000	41222000	20087000	27547000	49785000	30033000	48443000	4.27537e+07	1.55203	0.179318
W5PVZ9;F1N7D7;L8IQV4;O18738	>tr|W5PVZ9|W5PVZ9_SHEEP Uncharacterized protein OS=Ovis aries GN=DAG1 PE=4 SV=1;>tr|F1N7D7|F1N7D7_BOVIN Dystroglycan OS=Bos taurus GN=DAG1 PE=4 SV=1;>tr|L8IQV4|L8IQV4_9CETA Dystroglycan OS=Bos mutus GN=M91_12443 PE=4 SV=1;>sp|O18738|DAG1_BOVIN Dystroglycan	4	9	9	9	14.9	97.913	9.71e-69	130310000	115310000	104830000	1.16817e+08	138080000	165630000	120360000	1.41357e+08	1.21007	0.179547
W5Q5Z3;G3MYU2	>tr|W5Q5Z3|W5Q5Z3_SHEEP Uncharacterized protein OS=Ovis aries GN=KRT77 PE=3 SV=1;>tr|G3MYU2|G3MYU2_BOVIN Uncharacterized protein OS=Bos taurus GN=KRT77 PE=1 SV=1	2	8	3	3	12.7	60.837	1.71e-64	30276000		13321000	21798500	9496500	10420000	12108000	1.06748e+07	0.489705	0.180358
P49951;W5PUT6;L8IQH4;F1MPU0	>sp|P49951|CLH1_BOVIN Clathrin heavy chain 1 OS=Bos taurus GN=CLTC PE=1 SV=1;>tr|W5PUT6|W5PUT6_SHEEP Uncharacterized protein OS=Ovis aries GN=CLTC PE=4 SV=1;>tr|L8IQH4|L8IQH4_9CETA Clathrin heavy chain 1 (Fragment) OS=Bos mutus GN=M91_15747 PE=4 SV=1;>tr|F	4	77	77	77	59.9	191.59	0	4219300000	5294400000	3778400000	4430700000	14588000000	7579500000	5100700000	9089400000	2.05146	0.18062
P79136;W5PJ98	>sp|P79136|CAPZB_BOVIN F-actin-capping protein subunit beta OS=Bos taurus GN=CAPZB PE=1 SV=1;>tr|W5PJ98|W5PJ98_SHEEP Uncharacterized protein OS=Ovis aries GN=CAPZB PE=4 SV=1	2	10	10	10	36.5	33.741	5.37e-165	124610000	140110000	162210000	142310000	114350000	136480000	109570000	1.20133e+08	0.844166	0.180853
W5PVR4;A0A140T832;K4P486;L8J361;A5PK63	>tr|W5PVR4|W5PVR4_SHEEP Uncharacterized protein OS=Ovis aries GN=RPS17 PE=3 SV=1;>tr|A0A140T832|A0A140T832_BOVIN 40S ribosomal protein S17 OS=Bos taurus GN=RPS17 PE=3 SV=1;>tr|K4P486|K4P486_SHEEP Ribosomal protein S17 OS=Ovis aries GN=RPS17 PE=2 SV=1;>tr|L	5	4	4	4	36.9	16.155	7.96e-30	89404000	98248000	22213000	69955000	194260000	195150000	62878000	1.50763e+08	2.15514	0.181872
L8IDV4;Q3ZBU9;G1DGF0;W5PM13	>tr|L8IDV4|L8IDV4_9CETA UBX domain-containing protein 4 OS=Bos mutus GN=M91_16839 PE=4 SV=1;>sp|Q3ZBU9|UBXN4_BOVIN UBX domain-containing protein 4 OS=Bos taurus GN=UBXN4 PE=2 SV=2;>tr|G1DGF0|G1DGF0_CAPHI UBX domain-containing protein 4 OS=Capra hircus GN=U	4	2	2	2	6.6	63.721	4.42e-47	9554400	14879000	15477000	1.33035e+07	10280000	9819100	10646000	1.02484e+07	0.770353	0.18269
F1MN74;P41563;Q148J8;W5NR14;L8HX80	>tr|F1MN74|F1MN74_BOVIN Isocitrate dehydrogenase [NAD] subunit, mitochondrial OS=Bos taurus GN=IDH3A PE=3 SV=1;>sp|P41563|IDH3A_BOVIN Isocitrate dehydrogenase [NAD] subunit alpha, mitochondrial OS=Bos taurus GN=IDH3A PE=1 SV=1;>tr|Q148J8|Q148J8_BOVIN Isoci	5	3	3	3	12.3	39.669	4.5e-12	17421000	28041000	19583000	2.16817e+07	24397000	30114000	28151000	27554000	1.27084	0.182802
Q1JPA3;L8HMA6;W5QBI1	>sp|Q1JPA3|TMM47_BOVIN Transmembrane protein 47 OS=Bos taurus GN=TMEM47 PE=2 SV=1;>tr|L8HMA6|L8HMA6_9CETA Transmembrane protein 47 (Fragment) OS=Bos mutus GN=M91_15811 PE=4 SV=1;>tr|W5QBI1|W5QBI1_SHEEP Uncharacterized protein OS=Ovis aries PE=4 SV=1	3	2	2	2	10.5	19.997	2.98e-06	29211000	7191700	33684000	2.33622e+07	3589900	15558000	8025600	9.05783e+06	0.387713	0.183349
Q6Q298	>tr|Q6Q298|Q6Q298_SHEEP Beta actin (Fragment) OS=Ovis aries PE=2 SV=1	1	2	1	1	73.1	2.8022	7.01e-19	5505200	6370600		5937900	7558700	10560000		9059350	1.52568	0.183689
W5NWN1;L8J354;Q3SZ45	>tr|W5NWN1|W5NWN1_SHEEP Uncharacterized protein OS=Ovis aries GN=SDF2 PE=4 SV=1;>tr|L8J354|L8J354_9CETA Stromal cell-derived factor 2 (Fragment) OS=Bos mutus GN=M91_14631 PE=4 SV=1;>sp|Q3SZ45|SDF2_BOVIN Stromal cell-derived factor 2 OS=Bos taurus GN=SDF2 P	3	4	4	4	17.4	23.821	2.92e-10	48355000	30620000	42436000	4.04703e+07	18056000	24208000	39517000	2.72603e+07	0.673588	0.184137
L8I8P1;W5PBP1;Q3T076;Q862B7;W5P3D6;F1MR01;L8IIQ2;W5P327	>tr|L8I8P1|L8I8P1_9CETA 40S ribosomal protein S14 (Fragment) OS=Bos mutus GN=M91_17987 PE=3 SV=1;>tr|W5PBP1|W5PBP1_SHEEP Uncharacterized protein OS=Ovis aries GN=RPS14 PE=3 SV=1;>tr|Q3T076|Q3T076_BOVIN Ribosomal protein S14 OS=Bos taurus GN=RPS14 PE=1 SV=1	8	5	5	5	34.4	17.341	8.27e-94	198780000	220550000	91736000	1.70355e+08	702400000	545800000	120510000	4.56237e+08	2.67815	0.184201
W5QEX4;W5PN32	>tr|W5QEX4|W5QEX4_SHEEP Uncharacterized protein OS=Ovis aries GN=PLXNB2 PE=4 SV=1	2	28	2	2	19.1	189.93	1.88e-216	9325400		9199700	9262550	18262000	12249000		15255500	1.64701	0.184474
L8IR50;L8IL50;O41515;W5PQI9	>tr|L8IR50|L8IR50_9CETA Microtubule-associated proteins 1A/1B light chain 3B OS=Bos mutus GN=M91_08305 PE=3 SV=1;>tr|L8IL50|L8IL50_9CETA Microtubule-associated proteins 1A/1B light chain 3B OS=Bos mutus GN=M91_14519 PE=3 SV=1;>sp|O41515|MLP3B_BOVIN Microtu	4	2	2	1	11.4	20.695	2.78e-07	45896000	57127000	26617000	4.32133e+07	26114000	20065000		23089500	0.534314	0.184481
W5QBV7	>tr|W5QBV7|W5QBV7_SHEEP Uncharacterized protein OS=Ovis aries GN=CD44 PE=4 SV=1	1	8	8	2	11.2	76.407	4.23e-32	512110000	469440000	565640000	515730000	685190000	670890000	502630000	619570000	1.20135	0.184777
W5Q8I7;L8I9E9;A5PKH0;F1N4E5;L8I7Q4	>tr|W5Q8I7|W5Q8I7_SHEEP Uncharacterized protein OS=Ovis aries GN=TOR1AIP2 PE=4 SV=1;>tr|L8I9E9|L8I9E9_9CETA Torsin-1A-interacting protein 2 (Fragment) OS=Bos mutus GN=M91_20701 PE=4 SV=1;>tr|A5PKH0|A5PKH0_BOVIN TOR1AIP2 protein OS=Bos taurus GN=TOR1AIP2 PE	5	4	4	4	10.4	51.878	1.09e-39	19490000	28494000	37924000	28636000	19506000	20770000	20055000	2.01103e+07	0.702275	0.185237
W5Q4V5;F1MZK4;L8HSP5;Q3T143	>tr|W5Q4V5|W5Q4V5_SHEEP Uncharacterized protein OS=Ovis aries GN=BZW1 PE=4 SV=1;>tr|F1MZK4|F1MZK4_BOVIN Uncharacterized protein OS=Bos taurus GN=BZW1 PE=4 SV=2;>tr|L8HSP5|L8HSP5_9CETA Basic leucine zipper and W2 domain-containing protein 1 (Fragment) OS=Bo	4	7	7	7	17	51.653	2.41e-19	27207000	47470000	7571200	2.74161e+07	118860000	44076000		81468000	2.97154	0.185589
A2VDL8;F1MVW5;W5PF11	>sp|A2VDL8|SC23A_BOVIN Protein transport protein Sec23A OS=Bos taurus GN=SEC23A PE=2 SV=1;>tr|F1MVW5|F1MVW5_BOVIN Protein transport protein Sec23A OS=Bos taurus GN=SEC23A PE=4 SV=2;>tr|W5PF11|W5PF11_SHEEP Uncharacterized protein OS=Ovis aries GN=SEC23A PE=	3	24	24	18	42.1	86.673	0	476690000	845140000	493670000	6.05167e+08	2830700000	1477300000	624260000	1.64409e+09	2.71675	0.187093
F1MPT4	>tr|F1MPT4|F1MPT4_BOVIN Uncharacterized protein OS=Bos taurus GN=SDK2 PE=4 SV=2	1	15	15	1	9.5	241.35	1.77e-87	37848000	15763000	15085000	2.28987e+07	52887000	49529000	23323000	41913000	1.83037	0.187328
Q09YJ9;Q5E997;W5NPQ4;W5NPQ6;L8IBW7;W5PQ05;Q09YI7;Q09YI8	>sp|Q09YJ9|CAZA2_MUNMU F-actin-capping protein subunit alpha-2 OS=Muntiacus muntjak GN=CAPZA2 PE=3 SV=3;>sp|Q5E997|CAZA2_BOVIN F-actin-capping protein subunit alpha-2 OS=Bos taurus GN=CAPZA2 PE=1 SV=3;>tr|W5NPQ4|W5NPQ4_SHEEP Uncharacterized protein OS=Ovis	8	5	4	4	22.4	32.979	2.08e-54	29004000	30676000	41948000	33876000	43401000	35785000	49636000	4.29407e+07	1.26758	0.187368
O46414;G1K1K0;B0JYQ1;Q8HZP4;L8I7G0;I7C6B5;A1XEC0;A1XEB8	>sp|O46414|FRIH_BOVIN Ferritin heavy chain OS=Bos taurus GN=FTH1 PE=2 SV=3;>tr|G1K1K0|G1K1K0_BOVIN Ferritin OS=Bos taurus GN=FTH1 PE=3 SV=2;>tr|B0JYQ1|B0JYQ1_BOVIN Ferritin OS=Bos taurus GN=FTH1 PE=2 SV=1;>tr|Q8HZP4|Q8HZP4_BOVIN Ferritin (Fragment) OS=Bos	8	7	7	1	47.5	21.051	3.75e-82	158300000	151250000	190770000	1.66773e+08	288640000	165620000	468160000	3.07473e+08	1.84366	0.187794
E1BA29;L8ISB4;W5PS49;B5KLQ4;I7AUZ0;B5KLQ6	>tr|E1BA29|E1BA29_BOVIN Uncharacterized protein OS=Bos taurus GN=GNAQ PE=4 SV=1;>tr|L8ISB4|L8ISB4_9CETA Guanine nucleotide-binding protein G(Q) subunit alpha OS=Bos mutus GN=M91_05529 PE=4 SV=1;>tr|W5PS49|W5PS49_SHEEP Uncharacterized protein OS=Ovis aries	6	17	17	11	51.5	42.142	7.17e-126	737980000	503200000	633450000	6.24877e+08	304610000	401190000	620100000	4.41967e+08	0.707286	0.188208
Q3MHW8	>tr|Q3MHW8|Q3MHW8_BOVIN PALLD protein (Fragment) OS=Bos taurus GN=PALLD PE=2 SV=1	1	6	1	1	20.1	33.333	1.04e-16	20564000	27827000	21310000	2.32337e+07	8402400	21764000	17755000	15973800	0.687528	0.188248
W5PE01;L8IU42;Q5E9F5;L8IDQ5;W5QD62;L8I664;Q3ZBY2	>tr|W5PE01|W5PE01_SHEEP Transgelin OS=Ovis aries GN=TAGLN2 PE=3 SV=1;>tr|L8IU42|L8IU42_9CETA Transgelin (Fragment) OS=Bos mutus GN=M91_03140 PE=3 SV=1;>sp|Q5E9F5|TAGL2_BOVIN Transgelin-2 OS=Bos taurus GN=TAGLN2 PE=2 SV=3	7	11	11	11	61.2	26.358	2.49e-287	458070000	402220000	226450000	3.62247e+08	1132800000	665270000	380180000	7.26083e+08	2.00439	0.18916
A5JST6;Q3T0R1;W5PH51;L8ISE5;Q861U5;Q862S8;A3QP71	>sp|A5JST6|RS18_CAPHI 40S ribosomal protein S18 OS=Capra hircus GN=RPS18 PE=2 SV=1;>sp|Q3T0R1|RS18_BOVIN 40S ribosomal protein S18 OS=Bos taurus GN=RPS18 PE=2 SV=3;>tr|W5PH51|W5PH51_SHEEP Uncharacterized protein OS=Ovis aries GN=RPS18 PE=3 SV=1;>tr|L8ISE5|	7	7	7	7	35.5	17.718	5.31e-23	383300000	445780000	226300000	3.51793e+08	642810000	708950000	333390000	5.61717e+08	1.59672	0.189335
E1BPW2;L8IJT6;W5PSP1;W5Q1A6;A6QNV7;F1MTI4	>tr|E1BPW2|E1BPW2_BOVIN Uncharacterized protein OS=Bos taurus GN=ERC1 PE=4 SV=2;>tr|L8IJT6|L8IJT6_9CETA ELKS/Rab6-interacting/CAST family member 1 OS=Bos mutus GN=M91_15123 PE=4 SV=1;>tr|W5PSP1|W5PSP1_SHEEP Uncharacterized protein OS=Ovis aries GN=ERC1 PE=	6	4	4	4	4.3	128.17	4.14e-18	12955000	10837000	12639000	1.21437e+07	11217000	9362000		10289500	0.847314	0.189538
W5NZX3;E1BAN2;W5NZX4;L8HSU6	>tr|W5NZX3|W5NZX3_SHEEP Katanin p60 ATPase-containing subunit A-like 2 OS=Ovis aries GN=KATNAL2 PE=3 SV=1;>tr|E1BAN2|E1BAN2_BOVIN Katanin p60 ATPase-containing subunit A-like 2 OS=Bos taurus GN=KATNAL2 PE=1 SV=2;>tr|W5NZX4|W5NZX4_SHEEP Uncharacterized prot	4	1	1	1	2.2	60.617	0.0012186	41824000	25509000	13977000	2.71033e+07	16892000	13290000	12366000	1.41827e+07	0.523281	0.190019
W5NYM9;A0JN96;L8I0P5	>tr|W5NYM9|W5NYM9_SHEEP Uncharacterized protein OS=Ovis aries GN=STK3 PE=4 SV=1;>tr|A0JN96|A0JN96_BOVIN Serine/threonine kinase 3 (STE20 homolog, yeast) OS=Bos taurus GN=STK3 PE=2 SV=1;>tr|L8I0P5|L8I0P5_9CETA Serine/threonine-protein kinase 3 (Fragment) OS	3	1	1	1	4	56.618	0.0013838	112600000	165780000		139190000	204060000	315530000		259795000	1.86648	0.190049
A6QPN5;C8BKE4;F1MKH8;L8IXH8;Q9GLE5;W5Q9H0;Q9BGL4;Q9XSF6;Q9N284	>tr|A6QPN5|A6QPN5_BOVIN Matrix metallopeptidase 2 (Gelatinase A, 72kDa gelatinase, 72kDa type IV collagenase) OS=Bos taurus GN=MMP2 PE=2 SV=1;>tr|C8BKE4|C8BKE4_SHEEP Matrix metallopeptidase 2 OS=Ovis aries GN=MMP2 PE=2 SV=1;>tr|F1MKH8|F1MKH8_BOVIN 72 kDa t	9	11	11	11	22.1	73.833	1.65e-68	78255000	293950000	194500000	1.88902e+08	102370000	93784000	73216000	89790000	0.475327	0.190365
D7RH35;L8J1V0;Q3MHW6;W5QET6;Q2HWF1;Q0PD85;W5QET1	>tr|D7RH35|D7RH35_BOSMU Monocarboxylic acid transporter 1 OS=Bos mutus grunniens PE=2 SV=1;>tr|L8J1V0|L8J1V0_9CETA Monocarboxylate transporter 1 OS=Bos mutus GN=M91_03151 PE=4 SV=1;>sp|Q3MHW6|MOT1_BOVIN Monocarboxylate transporter 1 OS=Bos taurus GN=SLC16A	7	4	4	4	6.6	54.297	3.04e-144	182670000	144520000	105870000	1.44353e+08	109590000	124090000	67367000	100349000	0.695162	0.190467
E1BKU2;Q2NKY7;L8I736;W5Q8S1	>tr|E1BKU2|E1BKU2_BOVIN Septin-2 OS=Bos taurus GN=SEPT2 PE=3 SV=2;>sp|Q2NKY7|SEPT2_BOVIN Septin-2 OS=Bos taurus GN=SEPT2 PE=2 SV=1;>tr|L8I736|L8I736_9CETA Septin-2 (Fragment) OS=Bos mutus GN=M91_12493 PE=3 SV=1;>tr|W5Q8S1|W5Q8S1_SHEEP Uncharacterized prote	4	9	9	9	34.1	41.53	2.89e-234	185320000	170750000	104760000	153610000	358640000	199580000	187830000	2.48683e+08	1.61893	0.190599
W5PT98;B9VH06;W5PTA0;P13621;Q862C2;L8IRG3	>tr|W5PT98|W5PT98_SHEEP Uncharacterized protein OS=Ovis aries GN=ATP5O PE=3 SV=1;>tr|B9VH06|B9VH06_SHEEP Mitochondrial ATP synthase O subunit OS=Ovis aries GN=ATP5O PE=2 SV=1;>tr|W5PTA0|W5PTA0_SHEEP Uncharacterized protein OS=Ovis aries GN=ATP5O PE=3 SV=1;	6	3	3	3	22.5	25.948	4.45e-34	57519000	45968000	105380000	6.96223e+07	82985000	132310000	267140000	1.60812e+08	2.30977	0.190786
P15497;V6F9A2;V6F869;L8IIF0;O02762	>sp|P15497|APOA1_BOVIN Apolipoprotein A-I OS=Bos taurus GN=APOA1 PE=1 SV=3;>tr|V6F9A2|V6F9A2_BOVIN Apolipoprotein A-I preproprotein OS=Bos taurus GN=APOA1 PE=3 SV=1;>tr|V6F869|V6F869_BOVIN Apolipoprotein A-I-like OS=Bos taurus GN=LOC100297695 PE=3 SV=1;>tr	5	10	10	1	42.3	30.276	1.2e-44	80244000	249500000	108260000	1.46001e+08	72102000	66425000	50601000	6.30427e+07	0.431795	0.19104
F1MK42;L8ILR2;W5P6I2	>tr|F1MK42|F1MK42_BOVIN Uncharacterized protein OS=Bos taurus GN=RHOQ PE=4 SV=1;>tr|L8ILR2|L8ILR2_9CETA Rho-related GTP-binding protein RhoQ (Fragment) OS=Bos mutus GN=M91_03774 PE=4 SV=1;>tr|W5P6I2|W5P6I2_SHEEP Uncharacterized protein OS=Ovis aries GN=RHO	3	3	2	2	17.1	23.284	9.01e-10	19922000		9518700	14720350	4193900	10110000	7345500	7.21647e+06	0.490237	0.191133
W5QFP0	>tr|W5QFP0|W5QFP0_SHEEP Uncharacterized protein OS=Ovis aries GN=THBS1 PE=4 SV=1	1	46	1	0	45.6	141.22	0	70043000	201030000	158170000	143081000	36407000	67781000	114410000	72866000	0.509264	0.19151
L8ICD6;W5PIN4;P19858;W5PIN6;A0A1F3;D1MGL8;Q9N109;D3JWS8;L8I9G3;W5PIF6;B3F3K7;E1BNS9;B3F3K9;F1MK19;H9T8J1;Q2KJG0;B3F3K8;H9T8J2;Q7YS10;B3F3L1;H9T8J5	>tr|L8ICD6|L8ICD6_9CETA L-lactate dehydrogenase OS=Bos mutus GN=M91_16616 PE=3 SV=1;>tr|W5PIN4|W5PIN4_SHEEP L-lactate dehydrogenase OS=Ovis aries GN=LDHA PE=3 SV=1;>sp|P19858|LDHA_BOVIN L-lactate dehydrogenase A chain OS=Bos taurus GN=LDHA PE=2 SV=2;>tr|W5	21	11	11	9	33	39.712	1.34e-72	381620000	364320000	213460000	319800000	234850000	271960000	90637000	199149000	0.62273	0.191649
C5IWU1;G3N3N1;L8IPE8	>tr|C5IWU1|C5IWU1_SHEEP ADP-ribosylation factor 6 OS=Ovis aries GN=ARF6 PE=2 SV=1;>tr|G3N3N1|G3N3N1_BOVIN Uncharacterized protein OS=Bos taurus GN=ARF6 PE=3 SV=1;>tr|L8IPE8|L8IPE8_9CETA ADP-ribosylation factor 6 OS=Bos mutus GN=M91_12256 PE=3 SV=1	3	3	3	3	21.1	20.082	7.93e-37	14110000	16189000	14576000	1.49583e+07	56766000	37986000	11709000	35487000	2.37239	0.191673
W5PV92;F1N6Y7;W5PV90;Q32LD6	>tr|W5PV92|W5PV92_SHEEP Uncharacterized protein OS=Ovis aries GN=EIF5B PE=4 SV=1;>tr|F1N6Y7|F1N6Y7_BOVIN Uncharacterized protein OS=Bos taurus GN=EIF5B PE=1 SV=2;>tr|W5PV90|W5PV90_SHEEP Uncharacterized protein OS=Ovis aries GN=EIF5B PE=4 SV=1	4	10	10	10	10.7	138.25	1.06e-85	38322000	65371000		51846500	204300000	102720000		153510000	2.96086	0.192754
G3N0W8	>tr|G3N0W8|G3N0W8_BOVIN Uncharacterized protein OS=Bos taurus GN=PURB PE=4 SV=1	1	2	2	2	8.6	32.68	2.18e-05	10111000	8774300		9442650	14084000	11109000		12596500	1.334	0.192791
W5P4C0;L8IKI7;Q56JX8;E1BGR6;W5NZ96;W5PK48;L8ICF7;W5NSH5;L8IJQ4	>tr|W5P4C0|W5P4C0_SHEEP Uncharacterized protein OS=Ovis aries GN=RPS13 PE=3 SV=1;>tr|L8IKI7|L8IKI7_9CETA 40S ribosomal protein S13 OS=Bos mutus GN=M91_10984 PE=3 SV=1;>sp|Q56JX8|RS13_BOVIN 40S ribosomal protein S13 OS=Bos taurus GN=RPS13 PE=2 SV=3;>tr|E1BG	9	5	5	5	34.4	17.582	4.69e-31	396760000	330910000	275820000	3.34497e+08	756600000	696160000	276320000	576360000	1.72307	0.193737
Q5E9R3;W5PL84;L8IPX6;F1N6N3	>sp|Q5E9R3|EHD1_BOVIN EH domain-containing protein 1 OS=Bos taurus GN=EHD1 PE=1 SV=1;>tr|W5PL84|W5PL84_SHEEP Uncharacterized protein OS=Ovis aries GN=EHD1 PE=3 SV=1;>tr|L8IPX6|L8IPX6_9CETA EH domain-containing protein 1 (Fragment) OS=Bos mutus GN=M91_15968	4	18	17	10	46.3	60.681	0	386250000	434470000	346190000	388970000	672700000	569710000	364560000	5.35657e+08	1.37712	0.194018
L8ISC1;Q2KJE0;W5PHD8	>tr|L8ISC1|L8ISC1_9CETA Tax1-binding protein 1-like protein OS=Bos mutus GN=M91_02174 PE=4 SV=1;>sp|Q2KJE0|TAXB1_BOVIN Tax1-binding protein 1 homolog OS=Bos taurus GN=TAX1BP1 PE=2 SV=1;>tr|W5PHD8|W5PHD8_SHEEP Uncharacterized protein OS=Ovis aries GN=TAX1BP	3	4	4	4	7.1	94.058	1.83e-09		25307000	25800000	25553500	9704300	20534000		15119150	0.591667	0.194105
Q2KJH4;L8IQ59;F1MTP5	>sp|Q2KJH4|WDR1_BOVIN WD repeat-containing protein 1 OS=Bos taurus GN=WDR1 PE=2 SV=3;>tr|L8IQ59|L8IQ59_9CETA WD repeat-containing protein 1 (Fragment) OS=Bos mutus GN=M91_07578 PE=4 SV=1;>tr|F1MTP5|F1MTP5_BOVIN WD repeat-containing protein 1 OS=Bos taurus	3	12	12	1	26.9	66.257	9.07e-79	293990000	296360000	150230000	246860000	201870000	159670000	135940000	1.65827e+08	0.671744	0.194322
W5Q305;W5Q302;F1N6Y1;A6QNJ8;L8I0R2	>tr|W5Q305|W5Q305_SHEEP Uncharacterized protein OS=Ovis aries GN=GANAB PE=3 SV=1;>tr|W5Q302|W5Q302_SHEEP Uncharacterized protein OS=Ovis aries GN=GANAB PE=3 SV=1;>tr|F1N6Y1|F1N6Y1_BOVIN Uncharacterized protein OS=Bos taurus GN=GANAB PE=1 SV=1;>tr|A6QNJ8|A6	5	28	28	28	40.7	105.7	4.88e-226	660700000	747420000	1088400000	8.32173e+08	392030000	526680000	775160000	5.64623e+08	0.678492	0.195091
K4P490;L8I5Y3;Q2KJH6;W5PQE5	>tr|K4P490|K4P490_SHEEP Serpin peptidase inhibitor clade H member 1 OS=Ovis aries GN=SERPINH1 PE=2 SV=1;>tr|L8I5Y3|L8I5Y3_9CETA Serpin H1 OS=Bos mutus GN=M91_10013 PE=3 SV=1;>sp|Q2KJH6|SERPH_BOVIN Serpin H1 OS=Bos taurus GN=SERPINH1 PE=2 SV=1;>tr|W5PQE5|W5	4	22	22	22	67	46.506	0	9211100000	8225900000	11679000000	9.70533e+09	3588900000	5493300000	9993000000	6358400000	0.655145	0.195955
G3MZ54;W5P2D9;E0AE16;F1N6W6;L8I9Z6	>tr|G3MZ54|G3MZ54_BOVIN Uncharacterized protein OS=Bos taurus GN=SNX9 PE=4 SV=1;>tr|W5P2D9|W5P2D9_SHEEP Uncharacterized protein OS=Ovis aries GN=SNX9 PE=4 SV=1;>tr|E0AE16|E0AE16_BOVIN Sorting nexin OS=Bos taurus GN=SNX9 PE=2 SV=1;>tr|F1N6W6|F1N6W6_BOVIN So	5	9	9	9	16.7	74.233	1.58e-71	21018000	45234000	18722000	2.83247e+07	110640000	52930000	34743000	6.61043e+07	2.33381	0.196452
A7E3R8;L8I4M2;Q29RH9	>tr|A7E3R8|A7E3R8_BOVIN Transmembrane protein 109 OS=Bos taurus GN=TMEM109 PE=2 SV=1;>tr|L8I4M2|L8I4M2_9CETA Transmembrane protein 109 OS=Bos mutus GN=M91_18533 PE=4 SV=1;>tr|Q29RH9|Q29RH9_BOVIN Transmembrane protein 109 OS=Bos taurus GN=TMEM109 PE=1 SV=1	3	1	1	1	3.7	26.273	0.0023703	46992000	34194000	19095000	33427000	6203500	21423000		13813250	0.413236	0.196564
K7RCQ1;P46196;F1MI27;W5Q1R8;L8HUG9;H9TKZ1	>tr|K7RCQ1|K7RCQ1_CAPHI Mitogen-activated protein kinase OS=Capra hircus GN=ERK2 PE=2 SV=1;>sp|P46196|MK01_BOVIN Mitogen-activated protein kinase 1 OS=Bos taurus GN=MAPK1 PE=2 SV=3;>tr|F1MI27|F1MI27_BOVIN Mitogen-activated protein kinase OS=Bos taurus GN=M	6	6	6	5	23.3	41.375	8.6e-78	69011000	79097000	65045000	71051000	65110000	62943000	32421000	5.34913e+07	0.752858	0.19682
E1BFV0;L8II52;W5PF71	>tr|E1BFV0|E1BFV0_BOVIN Uncharacterized protein OS=Bos taurus GN=KPNB1 PE=1 SV=2;>tr|L8II52|L8II52_9CETA Importin subunit beta-1 (Fragment) OS=Bos mutus GN=M91_05245 PE=4 SV=1;>tr|W5PF71|W5PF71_SHEEP Uncharacterized protein OS=Ovis aries GN=KPNB1 PE=4 SV=1	3	19	19	19	30.9	97.226	9.47e-157	273500000	336330000	181470000	2.63767e+08	242050000	164690000	112800000	173180000	0.656565	0.196951
W5PHT7;L8IT18;P26884	>tr|W5PHT7|W5PHT7_SHEEP Peptidylprolyl isomerase OS=Ovis aries GN=FKBP3 PE=4 SV=1;>tr|L8IT18|L8IT18_9CETA Peptidylprolyl isomerase OS=Bos mutus GN=M91_01165 PE=4 SV=1;>sp|P26884|FKBP3_BOVIN Peptidyl-prolyl cis-trans isomerase FKBP3 OS=Bos taurus GN=FKBP3 P	3	5	5	5	24.9	25.287	7.46e-27	47124000	59764000	32047000	4.63117e+07	115540000	81346000	44313000	8.03997e+07	1.73606	0.197378
Q3T0V4;W5PUK3;L8I0E6;L8I1T3;Q30B81;A1XED6;G3MXJ7;L8IC11	>sp|Q3T0V4|RS11_BOVIN 40S ribosomal protein S11 OS=Bos taurus GN=RPS11 PE=2 SV=3;>tr|W5PUK3|W5PUK3_SHEEP Uncharacterized protein OS=Ovis aries GN=RPS11 PE=3 SV=1;>tr|L8I0E6|L8I0E6_9CETA Uncharacterized protein (Fragment) OS=Bos mutus GN=M91_17544 PE=3 SV=1	8	11	11	11	55.7	18.431	1.64e-39	223130000	266880000	123430000	204480000	701670000	625320000	133610000	4.86867e+08	2.381	0.197658
L8I6Z4;E1BKW5;W5P1F8;L8IMY7;F1MSS2;W5NTC8;A7YSY5	>tr|L8I6Z4|L8I6Z4_9CETA SEC23-interacting protein OS=Bos mutus GN=M91_15053 PE=4 SV=1;>tr|E1BKW5|E1BKW5_BOVIN Uncharacterized protein OS=Bos taurus GN=SEC23IP PE=4 SV=2;>tr|W5P1F8|W5P1F8_SHEEP Uncharacterized protein OS=Ovis aries GN=SEC23IP PE=4 SV=1	7	15	15	15	16.8	111.92	1.4e-88	30761000	82148000	44799000	5.25693e+07	288990000	118430000	67453000	158291000	3.01109	0.198761
L8I9X4;Q0VC12;W5PBZ7	>tr|L8I9X4|L8I9X4_9CETA Protein YIPF OS=Bos mutus GN=M91_00692 PE=3 SV=1;>tr|Q0VC12|Q0VC12_BOVIN Protein YIPF OS=Bos taurus GN=YIPF3 PE=2 SV=1;>tr|W5PBZ7|W5PBZ7_SHEEP Protein YIPF OS=Ovis aries GN=YIPF3 PE=3 SV=1	3	2	2	2	5.5	38.015	0.00037241	13324000	15986000	30982000	2.00973e+07	8846700	9829300	14846000	11174000	0.555994	0.198865
A0A1D8RE48;L8IMU8;Q863B3;W5NVT3	>tr|A0A1D8RE48|A0A1D8RE48_BOSMU Staphylococcal nuclease and tudor domain containing 1 OS=Bos mutus grunniens GN=SND1 PE=2 SV=1;>tr|L8IMU8|L8IMU8_9CETA Uncharacterized protein OS=Bos mutus GN=M91_17741 PE=4 SV=1;>sp|Q863B3|SND1_BOVIN Staphylococcal nuclease	4	31	31	31	42.1	101.99	0	371430000	441850000	338660000	383980000	915670000	622220000	362900000	6.33597e+08	1.65008	0.199425
Q3T126;W5Q3Z6;L8I217	>sp|Q3T126|CNIH4_BOVIN Protein cornichon homolog 4 OS=Bos taurus GN=CNIH4 PE=2 SV=1;>tr|W5Q3Z6|W5Q3Z6_SHEEP Uncharacterized protein OS=Ovis aries GN=CNIH4 PE=4 SV=1;>tr|L8I217|L8I217_9CETA Protein cornichon-like protein 4 OS=Bos mutus GN=M91_07372 PE=4 SV=	3	1	1	1	14.4	16.049	6.82e-52	53662000	41085000	64544000	53097000	108210000	54508000	75108000	7.92753e+07	1.49303	0.199427
G5E6M8;A5JST4;L8HVQ3;Q3T0F4;W5PLN8;W5PPT7;G1DFS8	>tr|G5E6M8|G5E6M8_BOVIN 40S ribosomal protein S10 OS=Bos taurus GN=RPS10 PE=4 SV=1;>tr|A5JST4|A5JST4_CAPHI Ribosomal protein S10 OS=Capra hircus GN=RPS10 PE=2 SV=1;>tr|L8HVQ3|L8HVQ3_9CETA 40S ribosomal protein S10 (Fragment) OS=Bos mutus GN=M91_12036 PE=4	7	8	7	7	38.7	20.802	4.33e-21	229800000	271340000	118360000	206500000	575270000	398100000	194590000	389320000	1.88533	0.199534
Q3SYR7;W5NTE7;L8IHP4;G3N0T8;L8IEI5;G3MYL1;G3N2H8;W5PYT7;F6PWD5;G3MXR3;W5Q3A0;L8I9T0;L8IEB5;L8J024;Q862F0;L8IUS5;G3MWV9;W5P2P9;Q9BEH4	>sp|Q3SYR7|RL9_BOVIN 60S ribosomal protein L9 OS=Bos taurus GN=RPL9 PE=2 SV=1;>tr|W5NTE7|W5NTE7_SHEEP Uncharacterized protein OS=Ovis aries GN=RPL9 PE=4 SV=1;>tr|L8IHP4|L8IHP4_9CETA Uncharacterized protein OS=Bos mutus GN=M91_19037 PE=4 SV=1;>tr|G3N0T8|G3N	19	5	5	5	35.9	21.876	1.13e-91	105770000	84205000	68721000	86232000	106390000	174770000	99069000	126743000	1.46979	0.199581
C5IJ88;L8IAP6;P50397;W5PE22;L8HR84;C5IJ94;P21856;W5P3E8;L8IGR6;F4YD13;Q9TS89	>tr|C5IJ88|C5IJ88_SHEEP Rab GDP dissociation inhibitor OS=Ovis aries PE=2 SV=1;>tr|L8IAP6|L8IAP6_9CETA Rab GDP dissociation inhibitor OS=Bos mutus GN=M91_20808 PE=3 SV=1;>sp|P50397|GDIB_BOVIN Rab GDP dissociation inhibitor beta OS=Bos taurus GN=GDI2 PE=2 S	11	14	14	14	45.6	50.474	1.77e-143	229350000	218010000	120820000	1.89393e+08	128450000	166270000	61711000	1.1881e+08	0.627321	0.200106
L8II24;Q2TBQ5;W5P0H3;L8HQR9;W5P381	>tr|L8II24|L8II24_9CETA 60S ribosomal protein L7a (Fragment) OS=Bos mutus GN=M91_19665 PE=4 SV=1;>sp|Q2TBQ5|RL7A_BOVIN 60S ribosomal protein L7a OS=Bos taurus GN=RPL7A PE=2 SV=3;>tr|W5P0H3|W5P0H3_SHEEP Uncharacterized protein OS=Ovis aries GN=RPL7A PE=4 SV	5	8	8	8	33.1	30.022	2.18e-75	729570000	804120000	290450000	6.08047e+08	1310400000	1309800000	562870000	1.06102e+09	1.74497	0.200895
L8IZD9;W5PQK7;C8BKE6;Q6EWQ7;L8IRT3;F1MN49;W5QHX1	>tr|L8IZD9|L8IZD9_9CETA Eukaryotic translation initiation factor 5A (Fragment) OS=Bos mutus GN=M91_13051 PE=3 SV=1;>tr|W5PQK7|W5PQK7_SHEEP Eukaryotic translation initiation factor 5A OS=Ovis aries GN=EIF5A PE=3 SV=1;>tr|C8BKE6|C8BKE6_SHEEP Eukaryotic trans	7	7	7	7	59.2	17.171	5.66e-193	269390000	378170000	168340000	2.71967e+08	459480000	289580000	437050000	395370000	1.45374	0.200903
F1MLW0;Q8HYY3;L8HV84;O18960;Q32L20;Q27976	>tr|F1MLW0|F1MLW0_BOVIN Non-muscle caldesmon OS=Bos taurus GN=CALD1 PE=1 SV=2;>tr|Q8HYY3|Q8HYY3_BOVIN L-caldesmon OS=Bos taurus PE=2 SV=1;>tr|L8HV84|L8HV84_9CETA Non-muscle caldesmon (Fragment) OS=Bos mutus GN=M91_03893 PE=4 SV=1;>tr|O18960|O18960_BOVIN Ca	6	16	16	2	27.9	62.075	2.43e-69	646800000	620650000	288610000	5.18687e+08	649780000	654230000	950520000	751510000	1.44887	0.201051
F1MB08;Q9XSJ4;W5PIG7;L8ISV3;W5PIG6;A6YLM5;Q3ZC09;W5P663;L8HU89;A6QR19;G9JNA8;W5P5C0;W5PYK2;Q9N113;F1N0N9;Q9TSD2;B6E3I8	>tr|F1MB08|F1MB08_BOVIN Alpha-enolase OS=Bos taurus GN=ENO1 PE=3 SV=1;>sp|Q9XSJ4|ENOA_BOVIN Alpha-enolase OS=Bos taurus GN=ENO1 PE=1 SV=4;>tr|W5PIG7|W5PIG7_SHEEP Uncharacterized protein OS=Ovis aries GN=ENO1 PE=3 SV=1;>tr|L8ISV3|L8ISV3_9CETA Alpha-enolase	17	20	20	20	58.5	47.283	1.25e-182	1040500000	1426300000	592530000	1.01978e+09	835080000	616400000	284880000	5.78787e+08	0.567562	0.201941
Q3ZBH8;W5PZT4;L8IXF0;B0LRQ1;L8IEB8	>sp|Q3ZBH8|RS20_BOVIN 40S ribosomal protein S20 OS=Bos taurus GN=RPS20 PE=3 SV=1;>tr|W5PZT4|W5PZT4_SHEEP Uncharacterized protein OS=Ovis aries GN=RPS20 PE=3 SV=1;>tr|L8IXF0|L8IXF0_9CETA 40S ribosomal protein S20 (Fragment) OS=Bos mutus GN=M91_19574 PE=3 SV	5	3	3	3	26.9	13.373	3.99e-12	120710000	135650000	46843000	1.01068e+08	455520000	543220000	34122000	3.44287e+08	3.4065	0.20201
A7Z035;W5PTB6;L8HV09	>sp|A7Z035|EPN4_BOVIN Clathrin interactor 1 OS=Bos taurus GN=CLINT1 PE=2 SV=1;>tr|W5PTB6|W5PTB6_SHEEP Uncharacterized protein OS=Ovis aries GN=CLINT1 PE=4 SV=1;>tr|L8HV09|L8HV09_9CETA Clathrin interactor 1 (Fragment) OS=Bos mutus GN=M91_13507 PE=4 SV=1	3	14	14	14	28.6	70.521	7.04e-118	73477000	277360000	102160000	150999000	824540000	430940000	144780000	4.66753e+08	3.0911	0.202018
W5P100;L8IB06;G3MZH4;F1MF68;W5P0Z7	>tr|W5P100|W5P100_SHEEP Uncharacterized protein OS=Ovis aries GN=AP1G1 PE=4 SV=1;>tr|L8IB06|L8IB06_9CETA AP-1 complex subunit gamma-1 (Fragment) OS=Bos mutus GN=M91_20411 PE=4 SV=1;>tr|G3MZH4|G3MZH4_BOVIN Uncharacterized protein OS=Bos taurus GN=AP1G1 PE=4	5	13	13	12	15.7	93.959	4.36e-72	29975000	68156000	48779000	48970000	120080000	101520000	42945000	8.81817e+07	1.80073	0.202126
L8INR9;W5PHG0;W5QFL0;W5PHI6;W5NTE3;W5QFP9;W5QFR8;L8I0I5;L8IRE7;P68432;W5NTQ3;L8IB38;A5PK61;E1BGN3;G3MYD7;G3N2P2;L8I0H3;L8IUP0;L8IV60;P84227;Q5E9F8;W5PNU4;W5PTZ9;W5Q8W8;L8ITV9;L8I8Q0;B0LRN3;W5NRH6;W5PS91;L8IRC6;Q3SZB8;W5P169;L8ISL8;W5P5A8;L8IRD2;L8I009;W5NRD9;L8HPK5	>tr|L8INR9|L8INR9_9CETA Uncharacterized protein (Fragment) OS=Bos mutus GN=M91_05551 PE=3 SV=1;>tr|W5PHG0|W5PHG0_SHEEP Histone H3 OS=Ovis aries GN=HIST1H3G PE=3 SV=1;>tr|W5QFL0|W5QFL0_SHEEP Histone H3 OS=Ovis aries GN=LOC101118484 PE=3 SV=1;>tr|W5PHI6|W5PH	38	4	4	4	30.6	20.369	2.45e-35	153670000	101800000		127735000	116090000	39515000	50107000	6.85707e+07	0.53682	0.203207
A5D7E8;L8IQN1;P38657	>tr|A5D7E8|A5D7E8_BOVIN Protein disulfide-isomerase OS=Bos taurus GN=PDIA3 PE=2 SV=1;>tr|L8IQN1|L8IQN1_9CETA Protein disulfide-isomerase OS=Bos mutus GN=M91_01180 PE=3 SV=1;>sp|P38657|PDIA3_BOVIN Protein disulfide-isomerase A3 OS=Bos taurus GN=PDIA3 PE=2 S	3	22	22	2	43.2	56.929	1.97e-283	3294800000	2281000000	3907200000	3161000000	1855300000	2118100000	2911700000	2.29503e+09	0.726047	0.203762
L8J1H5;Q0VC89;W5PVW6;W5PVW5	>tr|L8J1H5|L8J1H5_9CETA Palmitoyltransferase OS=Bos mutus GN=M91_11544 PE=3 SV=1;>sp|Q0VC89|ZDH20_BOVIN Probable palmitoyltransferase ZDHHC20 OS=Bos taurus GN=ZDHHC20 PE=2 SV=1;>tr|W5PVW6|W5PVW6_SHEEP Palmitoyltransferase OS=Ovis aries GN=ZDHHC20 PE=3 SV=1	4	3	3	3	10.1	41.907	3.71e-14	9125200	10611000	16628000	12121400	17323000		16554000	16938500	1.3974	0.20385
L8HSZ6;P04973;W5PPS6	>tr|L8HSZ6|L8HSZ6_9CETA Clathrin light chain OS=Bos mutus GN=M91_10877 PE=3 SV=1;>sp|P04973|CLCA_BOVIN Clathrin light chain A OS=Bos taurus GN=CLTA PE=1 SV=1;>tr|W5PPS6|W5PPS6_SHEEP Clathrin light chain OS=Ovis aries GN=CLTA PE=3 SV=1	3	6	6	6	25.1	26.723	5.1e-181	177160000	303590000	171860000	2.17537e+08	1106200000	424040000	289390000	6.06543e+08	2.78823	0.203924
W5PZ56;C0JXB7;L7Y3L7;L8IUY7;M9VAH8;N0BNR6;Q867D1;Q95MI7;Q9BG81;Q9TT94;K7R0B6;A4IEA5;C4RA88;O62849;B2YKZ0;Q6QPX4;G3MWM2;G3N2Z2;C4NFF6;B2YKZ1;Q3YMR4;Q4PJH6	>tr|W5PZ56|W5PZ56_SHEEP Acyl-CoA desaturase OS=Ovis aries GN=SCD PE=3 SV=1;>tr|C0JXB7|C0JXB7_SHEEP Stearoyl-CoA desaturase OS=Ovis aries GN=SCD PE=3 SV=1;>tr|L7Y3L7|L7Y3L7_BOSMU Fatty acid desaturase OS=Bos mutus grunniens PE=2 SV=1;>tr|L8IUY7|L8IUY7_9CETA	22	3	3	3	10.1	42.456	1.04e-05		18469000	14301000	16385000	50401000	26842000		38621500	2.35713	0.204143
W5PYH9;Q3T003;L8IIE8;Q862R3;F1MHJ6;L8IN80	>tr|W5PYH9|W5PYH9_SHEEP Uncharacterized protein OS=Ovis aries GN=RPL18A PE=3 SV=1;>sp|Q3T003|RL18A_BOVIN 60S ribosomal protein L18a OS=Bos taurus GN=RPL18A PE=2 SV=1;>tr|L8IIE8|L8IIE8_9CETA 60S ribosomal protein L18a (Fragment) OS=Bos mutus GN=M91_16404 PE	6	7	7	7	38.4	20.908	5.33e-25	273900000	279350000	170690000	2.41313e+08	510900000	489350000	202880000	4.01043e+08	1.66192	0.20417
L8IHB4;W5QGN5;F1MNQ3;W5P553;L8IKT9;F1MNQ1;W5P557;E1BCJ5;W5PL37;W5PL33;F1MM66	>tr|L8IHB4|L8IHB4_9CETA Disks large-like protein 1 OS=Bos mutus GN=M91_13865 PE=4 SV=1;>tr|W5QGN5|W5QGN5_SHEEP Uncharacterized protein OS=Ovis aries GN=DLG1 PE=4 SV=1;>tr|F1MNQ3|F1MNQ3_BOVIN Uncharacterized protein OS=Bos taurus GN=DLG1 PE=4 SV=2	11	18	18	18	25.6	103.39	4.06e-147	109810000	106750000	100640000	1.05733e+08	113900000	111340000	150400000	1.25213e+08	1.18424	0.205532
W5PKV0;L8INL6;A5D7L5	>tr|W5PKV0|W5PKV0_SHEEP Uncharacterized protein OS=Ovis aries GN=SLC39A14 PE=4 SV=1;>tr|L8INL6|L8INL6_9CETA Zinc transporter ZIP14 (Fragment) OS=Bos mutus GN=M91_04205 PE=4 SV=1;>sp|A5D7L5|S39AE_BOVIN Zinc transporter ZIP14 OS=Bos taurus GN=SLC39A14 PE=2 S	3	2	2	2	5.7	56.02	2.84e-34	37669000		46040000	41854500		33433000	18302000	25867500	0.618034	0.205692
G1DFP3	>tr|G1DFP3|G1DFP3_CAPHI Thrombospondin 1 OS=Capra hircus GN=THBS1 PE=2 SV=1	1	29	3	3	28.1	128.07	0	124050000	360610000	242800000	2.42487e+08	44394000	108780000	202190000	1.18455e+08	0.4885	0.205957
W5P610;L8I4L4;Q5E9B7;G1DFQ5;Q4QRP1;E1BAI4;W5PVR2;L8I7M4;W5PSY4;G3N3V2	>tr|W5P610|W5P610_SHEEP Chloride intracellular channel protein OS=Ovis aries GN=CLIC1 PE=3 SV=1;>tr|L8I4L4|L8I4L4_9CETA Chloride intracellular channel protein (Fragment) OS=Bos mutus GN=M91_10770 PE=3 SV=1;>sp|Q5E9B7|CLIC1_BOVIN Chloride intracellular chan	10	6	6	6	36.7	28.118	4.43e-38	77051000	62896000	49283000	6.30767e+07	111720000	84601000	64578000	8.69663e+07	1.37874	0.205964
Q3T087;W5PBM0;L8HZZ8	>sp|Q3T087|RL11_BOVIN 60S ribosomal protein L11 OS=Bos taurus GN=RPL11 PE=2 SV=3;>tr|W5PBM0|W5PBM0_SHEEP Uncharacterized protein OS=Ovis aries GN=RPL11 PE=3 SV=1;>tr|L8HZZ8|L8HZZ8_9CETA 60S ribosomal protein L11 (Fragment) OS=Bos mutus GN=M91_02239 PE=3 SV	3	3	3	3	17.4	20.252	5.38e-17	123920000	123230000	50250000	9.91333e+07	197960000	177570000	98132000	1.57887e+08	1.59268	0.206859
L8INZ1;A6QLL8;W5P1X9;Q9N116;L8I4U5;A5PK73;P52210;Q3T0S5;W5PCA0	>tr|L8INZ1|L8INZ1_9CETA Fructose-bisphosphate aldolase OS=Bos mutus GN=M91_15154 PE=3 SV=1;>tr|A6QLL8|A6QLL8_BOVIN Fructose-bisphosphate aldolase OS=Bos taurus GN=ALDOA PE=1 SV=1;>tr|W5P1X9|W5P1X9_SHEEP Fructose-bisphosphate aldolase OS=Ovis aries GN=ALDOA	9	20	20	15	50.2	45.108	0	1507700000	1519700000	786940000	1.27145e+09	6149600000	3044200000	1208800000	3.46753e+09	2.72723	0.207512
A5PJD6;W5NY08;W5NY07;W5PFV9;F1MQI3;F1MT60;W5PFW2	>tr|A5PJD6|A5PJD6_BOVIN ATL3 protein OS=Bos taurus GN=ATL3 PE=2 SV=1;>tr|W5NY08|W5NY08_SHEEP Uncharacterized protein OS=Ovis aries GN=ATL3 PE=4 SV=1;>tr|W5NY07|W5NY07_SHEEP Uncharacterized protein OS=Ovis aries GN=ATL3 PE=4 SV=1	7	21	21	21	46.6	60.311	0	745830000	531350000	755140000	677440000	321250000	454530000	680870000	485550000	0.716742	0.207947
W5PSI1;Q2KJ46;L8IF25;Q9TS76	>tr|W5PSI1|W5PSI1_SHEEP Uncharacterized protein OS=Ovis aries GN=PSMD3 PE=4 SV=1;>sp|Q2KJ46|PSMD3_BOVIN 26S proteasome non-ATPase regulatory subunit 3 OS=Bos taurus GN=PSMD3 PE=2 SV=1;>tr|L8IF25|L8IF25_9CETA 26S proteasome non-ATPase regulatory subunit 3 O	4	7	7	7	19.1	61.662	1.17e-54	41190000	50269000	33383000	41614000	31957000	31106000		31531500	0.757714	0.208198
L8ICJ1;A6QQR5	>tr|L8ICJ1|L8ICJ1_9CETA Transmembrane protein 43 (Fragment) OS=Bos mutus GN=M91_13880 PE=4 SV=1;>tr|A6QQR5|A6QQR5_BOVIN TMEM43 protein OS=Bos taurus GN=TMEM43 PE=1 SV=1	2	11	11	3	25.4	45.002	5.08e-51	249190000	209660000	287160000	248670000	82758000	192060000	239600000	1.71473e+08	0.689559	0.208547
W5QG16;Q3SYV4;W5QG17;L8I2B0;A6QLB7;W5PQG5;A5PKE1;F1N715;L8IDM3	>tr|W5QG16|W5QG16_SHEEP Adenylyl cyclase-associated protein OS=Ovis aries GN=CAP1 PE=3 SV=1;>sp|Q3SYV4|CAP1_BOVIN Adenylyl cyclase-associated protein 1 OS=Bos taurus GN=CAP1 PE=2 SV=3;>tr|W5QG17|W5QG17_SHEEP Adenylyl cyclase-associated protein OS=Ovis arie	9	17	17	17	48.5	51.27	1.24e-275	464630000	454760000	254160000	3.91183e+08	362500000	242980000	172520000	2.59333e+08	0.662946	0.209193
Q3ZBN5;W5PEI2	>sp|Q3ZBN5|ASPN_BOVIN Asporin OS=Bos taurus GN=ASPN PE=2 SV=1;>tr|W5PEI2|W5PEI2_SHEEP Uncharacterized protein OS=Ovis aries GN=ASPN PE=4 SV=1	2	6	6	6	21.6	42.119	1.04e-18	25150000	91752000	50668000	5.58567e+07	19452000	27132000	32674000	2.64193e+07	0.472984	0.210831
L8I0U2;E1BEL6;W5QAQ4;B0LRP9	>tr|L8I0U2|L8I0U2_9CETA Neuropilin OS=Bos mutus GN=M91_06546 PE=3 SV=1;>tr|E1BEL6|E1BEL6_BOVIN Neuropilin OS=Bos taurus GN=NRP2 PE=3 SV=1;>tr|W5QAQ4|W5QAQ4_SHEEP Neuropilin OS=Ovis aries GN=NRP2 PE=3 SV=1	4	12	12	12	17.7	104.51	4.58e-94	12856000	24436000	27630000	2.16407e+07	174160000	43218000	43131000	8.68363e+07	4.01265	0.211627
L8HY95;Q3T0L7;W5NTJ6	>tr|L8HY95|L8HY95_9CETA 60S ribosomal protein L28 OS=Bos mutus GN=M91_13717 PE=4 SV=1;>sp|Q3T0L7|RL28_BOVIN 60S ribosomal protein L28 OS=Bos taurus GN=RPL28 PE=2 SV=3;>tr|W5NTJ6|W5NTJ6_SHEEP Uncharacterized protein OS=Ovis aries GN=RPL28 PE=4 SV=1	3	6	6	6	32.8	15.692	9.95e-15	185130000	160040000	96749000	1.47306e+08	338450000	283150000	126190000	2.49263e+08	1.69214	0.212474
W5PYG7;Q3ZCK1	>tr|W5PYG7|W5PYG7_SHEEP Uncharacterized protein OS=Ovis aries GN=EIF3L PE=3 SV=1;>sp|Q3ZCK1|EIF3L_BOVIN Eukaryotic translation initiation factor 3 subunit L OS=Bos taurus GN=EIF3L PE=2 SV=1	2	20	20	20	38.7	68.644	3.61e-119	85464000	75201000	69552000	76739000	328940000	148120000	81766000	1.86275e+08	2.42739	0.21295
L8IGM2;W5P9M4;Q3ZC71	>tr|L8IGM2|L8IGM2_9CETA Dolichol-phosphate mannosyltransferase subunit 3 (Fragment) OS=Bos mutus GN=M91_20864 PE=4 SV=1;>tr|W5P9M4|W5P9M4_SHEEP Uncharacterized protein OS=Ovis aries GN=DPM3 PE=4 SV=1;>sp|Q3ZC71|DPM3_BOVIN Dolichol-phosphate mannosyltransfe	3	2	2	2	21.8	11.034	1.97e-11	81421000	63831000	170980000	1.05411e+08	53786000	54484000	60374000	5.62147e+07	0.533292	0.212983
W5NVD7;L8I0S4;Q3SZA0	>tr|W5NVD7|W5NVD7_SHEEP Uncharacterized protein OS=Ovis aries GN=COPS4 PE=4 SV=1;>tr|L8I0S4|L8I0S4_9CETA COP9 signalosome complex subunit 4 OS=Bos mutus GN=M91_10807 PE=4 SV=1;>sp|Q3SZA0|CSN4_BOVIN COP9 signalosome complex subunit 4 OS=Bos taurus GN=COPS4	3	3	3	3	8.4	46.38	2.89e-06	4604200	10446000		7525100	25729000		70192000	47960500	6.3734	0.213111
A4IFA5;G3N0B6;Q0V8K0	>tr|A4IFA5|A4IFA5_BOVIN Slit-like 2 OS=Bos taurus GN=VASN PE=2 SV=1;>tr|G3N0B6|G3N0B6_BOVIN Uncharacterized protein OS=Bos taurus GN=VASN PE=4 SV=1	3	6	6	4	8.9	71.706	2.7e-16	56995000	92971000	94360000	81442000	113450000	136740000	82377000	1.10856e+08	1.36116	0.214177
Q3ZBT5;W5PY17;L8I1R7	>sp|Q3ZBT5|STX7_BOVIN Syntaxin-7 OS=Bos taurus GN=STX7 PE=2 SV=1;>tr|W5PY17|W5PY17_SHEEP Uncharacterized protein OS=Ovis aries GN=STX7 PE=3 SV=1;>tr|L8I1R7|L8I1R7_9CETA Syntaxin-7 (Fragment) OS=Bos mutus GN=M91_03850 PE=3 SV=1	3	9	9	9	57.5	29.656	4.3e-214	171830000	143780000	183430000	1.66347e+08	211900000	214390000	501960000	3.09417e+08	1.86007	0.214216
F1N1G7;W5PVU0;L8IA76;F1MZB0;W5P814;Q3MHM9;Q0II58;A7E3C1;Q307F4;A7E364	>tr|F1N1G7|F1N1G7_BOVIN Kinesin-like protein OS=Bos taurus GN=KIF5B PE=1 SV=2;>tr|W5PVU0|W5PVU0_SHEEP Kinesin-like protein OS=Ovis aries GN=KIF5B PE=3 SV=1	10	23	23	18	28.7	109.78	7.76e-203	123510000	235460000	116110000	158360000	107030000	115470000	71923000	98141000	0.619734	0.214422
W5PPQ6;Q3ZCC9;L8IKT4	>tr|W5PPQ6|W5PPQ6_SHEEP Uncharacterized protein OS=Ovis aries GN=SEC13 PE=4 SV=1;>sp|Q3ZCC9|SEC13_BOVIN Protein SEC13 homolog OS=Bos taurus GN=SEC13 PE=2 SV=1;>tr|L8IKT4|L8IKT4_9CETA Protein SEC13-like protein (Fragment) OS=Bos mutus GN=M91_08238 PE=4 SV=1	3	8	8	8	37.3	35.449	1.55e-249	97888000	301350000	133410000	1.77549e+08	1026600000	487540000	163510000	5.59217e+08	3.14964	0.215191
W5QGG0	>tr|W5QGG0|W5QGG0_SHEEP Uncharacterized protein OS=Ovis aries GN=TFRC PE=4 SV=1	1	11	3	3	14.5	85.741	2.24e-54	21145000	18091000	31972000	23736000	13386000	16644000		15015000	0.632583	0.215435
W5QFL4;A5D7D3;F1MS94	>tr|W5QFL4|W5QFL4_SHEEP Uncharacterized protein OS=Ovis aries GN=CSDE1 PE=4 SV=1;>tr|A5D7D3|A5D7D3_BOVIN CSDE1 protein OS=Bos taurus GN=CSDE1 PE=2 SV=1;>tr|F1MS94|F1MS94_BOVIN Uncharacterized protein OS=Bos taurus GN=CSDE1 PE=4 SV=1	3	8	8	8	10.5	90.655	1.18e-17	16362000	9043200	33109000	1.95047e+07	133190000	29681000		81435500	4.17517	0.216288
O77588;G8JKV7;W5Q989	>sp|O77588|PLOD1_BOVIN Procollagen-lysine,2-oxoglutarate 5-dioxygenase 1 OS=Bos taurus GN=PLOD1 PE=2 SV=2;>tr|G8JKV7|G8JKV7_BOVIN Procollagen-lysine,2-oxoglutarate 5-dioxygenase 1 OS=Bos taurus GN=PLOD1 PE=4 SV=1;>tr|W5Q989|W5Q989_SHEEP Uncharacterized pro	3	15	15	15	26.6	83.486	6.07e-101	242230000	198360000	305670000	2.48753e+08	88811000	182600000	238870000	1.70094e+08	0.683784	0.216976
A7MB16;L8J1D8;W5P508	>sp|A7MB16|EIF3B_BOVIN Eukaryotic translation initiation factor 3 subunit B OS=Bos taurus GN=EIF3B PE=2 SV=1;>tr|L8J1D8|L8J1D8_9CETA Eukaryotic translation initiation factor 3 subunit B OS=Bos mutus GN=EIF3B PE=3 SV=1;>tr|W5P508|W5P508_SHEEP Eukaryotic tra	3	21	21	21	31.3	88.918	1.29e-136	100770000	99275000	69156000	8.97337e+07	389070000	256320000	53976000	233122000	2.59793	0.217141
L8J474;F1MIF2;W5P1Q0;Q2KJB2	>tr|L8J474|L8J474_9CETA AP complex subunit beta OS=Bos mutus GN=M91_02898 PE=3 SV=1;>tr|F1MIF2|F1MIF2_BOVIN AP complex subunit beta OS=Bos taurus GN=AP1B1 PE=3 SV=1;>tr|W5P1Q0|W5P1Q0_SHEEP AP complex subunit beta OS=Ovis aries GN=AP1B1 PE=3 SV=1;>tr|Q2KJB2	4	27	12	12	41.8	104.38	9.13e-269	40659000	73926000	40552000	5.17123e+07	266860000	120570000	51042000	1.46157e+08	2.82635	0.217345
W5PSD4;A7MB78;L8INC0;Q58CX0;W5QGF8;E1B9X7;L8IQ22	>tr|W5PSD4|W5PSD4_SHEEP Glycogen [starch] synthase OS=Ovis aries GN=GYS1 PE=3 SV=1;>sp|A7MB78|GYS1_BOVIN Glycogen [starch] synthase, muscle OS=Bos taurus GN=GYS1 PE=2 SV=1;>tr|L8INC0|L8INC0_9CETA Glycogen [starch] synthase (Fragment) OS=Bos mutus GN=M91_16	7	14	14	14	26.1	86.2	5.36e-117	62614000	51407000	86718000	66913000	69452000	157850000	96813000	1.08038e+08	1.61461	0.217541
W5P940;Q2TBX5;L8HRW7	>tr|W5P940|W5P940_SHEEP Uncharacterized protein OS=Ovis aries GN=SSR4 PE=4 SV=1;>sp|Q2TBX5|SSRD_BOVIN Translocon-associated protein subunit delta OS=Bos taurus GN=SSR4 PE=2 SV=1;>tr|L8HRW7|L8HRW7_9CETA Uncharacterized protein (Fragment) OS=Bos mutus GN=M91	3	5	5	5	36.4	18.885	4.25e-55	723860000	600810000	1232500000	852390000	309910000	499880000	739840000	5.16543e+08	0.605994	0.217859
W5Q3Y9;W5Q3Y8;W5Q3Y4;F1MPR3;W5NVR5;L8IL59;F1MGE7;Q0VCY0;W5NVR1;A6YLM0;Q5MA64;W5Q9B1;L8HX21;E1BMQ6	>tr|W5Q3Y9|W5Q3Y9_SHEEP Uncharacterized protein OS=Ovis aries GN=ATP2A2 PE=3 SV=1;>tr|W5Q3Y8|W5Q3Y8_SHEEP Calcium-transporting ATPase OS=Ovis aries GN=ATP2A2 PE=3 SV=1;>tr|W5Q3Y4|W5Q3Y4_SHEEP Calcium-transporting ATPase OS=Ovis aries GN=ATP2A2 PE=3 SV=1;>t	14	32	32	32	39.8	116.45	1.2e-278	1145300000	772530000	1498500000	1.13878e+09	308490000	657800000	1094800000	687030000	0.603305	0.21793
W5PR95;F1MB60;L8I086;Q56JV1;L8IVS7;Q6Q312;A1XED9;W5QE09;G3N0E2;L8HT14	>tr|W5PR95|W5PR95_SHEEP 40S ribosomal protein S26 OS=Ovis aries GN=RPS26 PE=3 SV=1;>tr|F1MB60|F1MB60_BOVIN 40S ribosomal protein S26 OS=Bos taurus GN=RPS26 PE=3 SV=1;>tr|L8I086|L8I086_9CETA 40S ribosomal protein S26 (Fragment) OS=Bos mutus GN=M91_07253 PE=	10	3	3	3	25.4	13.517	3.45e-24	248240000	277420000	162400000	2.29353e+08	314020000	373530000	233440000	3.06997e+08	1.33853	0.218818
W5Q2U7;L8IF92	>tr|W5Q2U7|W5Q2U7_SHEEP Uncharacterized protein OS=Ovis aries GN=PLEC PE=4 SV=1	2	56	6	6	14.4	480.24	2.63e-186	12219000	8427500		10323250	39761000	35560000	119310000	64877000	6.28455	0.218955
W5Q7R7	>tr|W5Q7R7|W5Q7R7_SHEEP Uncharacterized protein OS=Ovis aries GN=CYP51A1 PE=3 SV=1	1	11	11	2	22.2	57.676	1.57e-40	187960000	139990000	226760000	1.84903e+08	98308000	158690000	157720000	1.38239e+08	0.74763	0.219341
L8HR46;Q3SWY3;W5Q1I6	>tr|L8HR46|L8HR46_9CETA Inosine-5-monophosphate dehydrogenase (Fragment) OS=Bos mutus GN=M91_16961 PE=3 SV=1;>sp|Q3SWY3|IMDH2_BOVIN Inosine-5-monophosphate dehydrogenase 2 OS=Bos taurus GN=IMPDH2 PE=2 SV=1;>tr|W5Q1I6|W5Q1I6_SHEEP Inosine-5-monophosphate	3	12	12	11	26.3	56.2	1.36e-47	12749000	24254000	10134000	1.57123e+07	295520000	35509000		165514500	10.534	0.220429
A6H7I5;L8IVG1;F1MW91;W5Q6V5;Q3MI06;A7E382;E1BA62;W5PWI2	>sp|A6H7I5|DYN2_BOVIN Dynamin-2 OS=Bos taurus GN=DNM2 PE=2 SV=1;>tr|L8IVG1|L8IVG1_9CETA Dynamin-2 (Fragment) OS=Bos mutus GN=M91_04919 PE=3 SV=1;>tr|F1MW91|F1MW91_BOVIN Dynamin-2 OS=Bos taurus GN=DNM2 PE=3 SV=2;>tr|W5Q6V5|W5Q6V5_SHEEP Uncharacterized prote	8	13	13	9	17.4	97.835	1.3e-82	24626000	47995000	30430000	3.43503e+07	138830000	61785000	37898000	7.95043e+07	2.31451	0.222033
F1N157;L8ISI8	>tr|F1N157|F1N157_BOVIN Uncharacterized protein OS=Bos taurus GN=ITGA11 PE=3 SV=1;>tr|L8ISI8|L8ISI8_9CETA Integrin alpha-11 (Fragment) OS=Bos mutus GN=M91_20551 PE=3 SV=1	2	30	30	3	28.4	131.19	3.66e-295	1451300000	1559800000	1543300000	1.51813e+09	246290000	1232300000	1458700000	9.79097e+08	0.644935	0.222661
Q3SZU5;F1MMC0;L8HQD7;W5PA30	>sp|Q3SZU5|SPCS3_BOVIN Signal peptidase complex subunit 3 OS=Bos taurus GN=SPCS3 PE=2 SV=1;>tr|F1MMC0|F1MMC0_BOVIN Signal peptidase complex subunit 3 OS=Bos taurus GN=SPCS3 PE=4 SV=2;>tr|L8HQD7|L8HQD7_9CETA Signal peptidase complex subunit 3 (Fragment) OS=	4	4	4	4	21.7	20.313	4.46e-14	118770000	58399000	147810000	1.08326e+08	38163000	69476000	87487000	65042000	0.600426	0.222781
Q3T0E5;W5P935;L8I855	>sp|Q3T0E5|APMAP_BOVIN Adipocyte plasma membrane-associated protein OS=Bos taurus GN=APMAP PE=2 SV=1;>tr|W5P935|W5P935_SHEEP Uncharacterized protein OS=Ovis aries GN=APMAP PE=4 SV=1;>tr|L8I855|L8I855_9CETA Adipocyte plasma membrane-associated protein (Frag	3	9	9	9	29.1	46.09	7.83e-52	89581000	83021000	164880000	112494000	68076000	73503000	81286000	7.42883e+07	0.660376	0.223402
Q3ZBE9;L8J1X3;W5PE74	>sp|Q3ZBE9|NSDHL_BOVIN Sterol-4-alpha-carboxylate 3-dehydrogenase, decarboxylating OS=Bos taurus GN=NSDHL PE=2 SV=1;>tr|L8J1X3|L8J1X3_9CETA Sterol-4-alpha-carboxylate 3-dehydrogenase, decarboxylating (Fragment) OS=Bos mutus GN=M91_08438 PE=3 SV=1;>tr|W5PE7	3	4	4	4	12.4	39.902	3.63e-13	60316000	74700000	111130000	8.20487e+07	35996000	73665000	56064000	5.52417e+07	0.673279	0.22358
W5Q1N8;L8I5H6;Q3T199;G3X7D5;E1B8G4;E1BEQ3;W5QFG9;G1DGD5;G1DFV9;L8HWD3	>tr|W5Q1N8|W5Q1N8_SHEEP Uncharacterized protein OS=Ovis aries GN=RPS23 PE=4 SV=1;>tr|L8I5H6|L8I5H6_9CETA 40S ribosomal protein S23 (Fragment) OS=Bos mutus GN=M91_16985 PE=3 SV=1;>sp|Q3T199|RS23_BOVIN 40S ribosomal protein S23 OS=Bos taurus GN=RPS23 PE=2 SV	10	5	5	5	35.3	18.907	8.58e-16	50255000	88078000	60188000	6.61737e+07	160910000	76911000		118910500	1.79695	0.224328
L8HYY3;Q08DU9;W5PG93	>tr|L8HYY3|L8HYY3_9CETA Heterochromatin protein 1-binding protein 3 OS=Bos mutus GN=M91_09662 PE=4 SV=1;>sp|Q08DU9|HP1B3_BOVIN Heterochromatin protein 1-binding protein 3 OS=Bos taurus GN=HP1BP3 PE=2 SV=1;>tr|W5PG93|W5PG93_SHEEP Uncharacterized protein OS=	3	2	2	2	4	61.783	0.0014079	60157000	76189000	80034000	7.21267e+07	7854900	66018000		36936450	0.512105	0.224375
L8IIC7;P79134;W5PEC3;Q9TSA3	>tr|L8IIC7|L8IIC7_9CETA Annexin (Fragment) OS=Bos mutus GN=M91_14330 PE=3 SV=1;>sp|P79134|ANXA6_BOVIN Annexin A6 OS=Bos taurus GN=ANXA6 PE=1 SV=2;>tr|W5PEC3|W5PEC3_SHEEP Annexin OS=Ovis aries GN=ANXA6 PE=3 SV=1	4	37	37	37	57.3	75.394	0	15410000000	7465100000	3664300000	8.84647e+09	3758100000	4604400000	3206800000	3.85643e+09	0.435929	0.225349
Q3SZ90;W5QFZ8;Q7M2Y2;W5PUH8;L8HZD8;W5PAC4;G3MXM1;W5Q8Q3;A3QP69	>sp|Q3SZ90|RL13A_BOVIN 60S ribosomal protein L13a OS=Bos taurus GN=RPL13A PE=2 SV=3;>tr|W5QFZ8|W5QFZ8_SHEEP Uncharacterized protein OS=Ovis aries GN=LOC101109545 PE=3 SV=1;>tr|Q7M2Y2|Q7M2Y2_BOVIN Tumor-specific transplantation antigen P198 homolog p23 (Fra	9	8	8	8	36.9	23.523	2e-24	314920000	360500000	172440000	282620000	587640000	536230000	243990000	4.55953e+08	1.61331	0.225527
W5QEE6;F1MLV6;L8IN05	>tr|W5QEE6|W5QEE6_SHEEP Uncharacterized protein OS=Ovis aries GN=LCLAT1 PE=4 SV=1;>tr|F1MLV6|F1MLV6_BOVIN Uncharacterized protein OS=Bos taurus GN=LCLAT1 PE=4 SV=2;>tr|L8IN05|L8IN05_9CETA Lysocardiolipin acyltransferase 1 (Fragment) OS=Bos mutus GN=M91_096	3	2	2	2	5.3	45.135	2.73e-05	19887000		21125000	20506000		11596000	18065000	14830500	0.723227	0.226958
A6QNL5;L8IQ18;W5Q282;Q0V8C4;L8ITW8	>tr|A6QNL5|A6QNL5_BOVIN PDIA6 protein (Fragment) OS=Bos taurus GN=PDIA6 PE=1 SV=1;>tr|L8IQ18|L8IQ18_9CETA Protein disulfide-isomerase A6 (Fragment) OS=Bos mutus GN=M91_05488 PE=3 SV=1;>tr|W5Q282|W5Q282_SHEEP Uncharacterized protein OS=Ovis aries GN=PDIA6 P	5	10	10	10	27.8	49.624	3.71e-236	1350000000	1030400000	1580700000	1.32037e+09	423460000	813820000	1367600000	8.68293e+08	0.657615	0.226971
W5PY51;Q307G9	>tr|W5PY51|W5PY51_SHEEP Uncharacterized protein OS=Ovis aries GN=CYR61 PE=4 SV=1;>tr|Q307G9|Q307G9_SHEEP Cysteine-rich angiogenic inducer 61 (Fragment) OS=Ovis aries PE=2 SV=1	2	6	6	1	14.9	41.976	2.07e-12	20343000	233800000	55697000	103280000	6510400	11721000	9534600	9.25533e+06	0.089614	0.227795
F1MSB7;L8IFT9;A7E3Q8;W5Q6H1;Q2KJ75;A6H742;L8J1D5;W5P7T1	>tr|F1MSB7|F1MSB7_BOVIN Plastin-3 OS=Bos taurus GN=PLS3 PE=1 SV=1;>tr|L8IFT9|L8IFT9_9CETA Plastin-3 OS=Bos mutus GN=M91_14303 PE=4 SV=1;>sp|A7E3Q8|PLST_BOVIN Plastin-3 OS=Bos taurus GN=PLS3 PE=2 SV=1;>tr|W5Q6H1|W5Q6H1_SHEEP Uncharacterized protein OS=Ovis	8	31	31	23	58.4	71.801	6e-170	413300000	430100000	309950000	384450000	1105800000	631500000	359760000	699020000	1.81823	0.228072
L8IJB4;Q5E973;W5PQR5;Q0QEV5	>tr|L8IJB4|L8IJB4_9CETA 60S ribosomal protein L18 (Fragment) OS=Bos mutus GN=M91_16030 PE=4 SV=1;>sp|Q5E973|RL18_BOVIN 60S ribosomal protein L18 OS=Bos taurus GN=RPL18 PE=2 SV=3;>tr|W5PQR5|W5PQR5_SHEEP Uncharacterized protein OS=Ovis aries GN=RPL18 PE=4 SV	4	7	7	7	39.9	21.532	8.55e-95	909900000	801640000	785210000	832250000	1296600000	1136700000	760940000	1.06475e+09	1.27936	0.228112
A0JN67;F1MM79;W5PWH8;W5PWI3;L8I4T7	>tr|A0JN67|A0JN67_BOVIN Glutaminase OS=Bos taurus GN=GLS PE=2 SV=1;>tr|F1MM79|F1MM79_BOVIN Uncharacterized protein OS=Bos taurus GN=GLS PE=3 SV=1;>tr|W5PWH8|W5PWH8_SHEEP Uncharacterized protein OS=Ovis aries GN=GLS PE=3 SV=1;>tr|W5PWI3|W5PWI3_SHEEP Unchara	5	4	4	4	8.8	66.211	1.18e-08	12556000	8347000	9824800	10242600		11746000	31650000	21698000	2.11841	0.228209
L8INK3;Q5E9E8;W5NVS6	>tr|L8INK3|L8INK3_9CETA Protein YIPF OS=Bos mutus GN=M91_04736 PE=3 SV=1;>sp|Q5E9E8|YIPF5_BOVIN Protein YIPF5 OS=Bos taurus GN=YIPF5 PE=2 SV=1;>tr|W5NVS6|W5NVS6_SHEEP Protein YIPF OS=Ovis aries GN=YIPF5 PE=3 SV=1	3	2	2	2	8.2	27.986	1.48e-05	21529000	29378000	51162000	34023000	17350000	25665000	19962000	2.09923e+07	0.617004	0.229514
W5PJJ0;Q2KJA1;W5PXF9;L8IXZ0;L8IMB2;Q08DX1	>tr|W5PJJ0|W5PJJ0_SHEEP Uncharacterized protein OS=Ovis aries GN=SH3GL1 PE=4 SV=1;>sp|Q2KJA1|SH3G1_BOVIN Endophilin-A2 OS=Bos taurus GN=SH3GL1 PE=2 SV=1;>tr|W5PXF9|W5PXF9_SHEEP Uncharacterized protein OS=Ovis aries GN=SH3GL2 PE=4 SV=1;>tr|L8IXZ0|L8IXZ0_9CE	6	2	2	2	5.5	40.874	1.28e-06	34706000	45991000	61431000	47376000	26294000	45740000	27853000	3.32957e+07	0.702796	0.229788
Q3T102;W5PZH7;L8IM67	>sp|Q3T102|EIF3E_BOVIN Eukaryotic translation initiation factor 3 subunit E OS=Bos taurus GN=EIF3E PE=2 SV=1;>tr|W5PZH7|W5PZH7_SHEEP Eukaryotic translation initiation factor 3 subunit E OS=Ovis aries GN=EIF3E PE=3 SV=1;>tr|L8IM67|L8IM67_9CETA Eukaryotic tr	3	15	15	15	39.3	52.19	6.24e-88	110440000	96455000	88572000	98489000	398980000	214040000	77827000	2.30282e+08	2.33815	0.230577
L8IPF7;Q58CQ2;Q0V8E5;Q1JPK9;Q862G4	>tr|L8IPF7|L8IPF7_9CETA Actin-related protein 2/3 complex subunit 1B OS=Bos mutus GN=M91_05918 PE=4 SV=1;>sp|Q58CQ2|ARC1B_BOVIN Actin-related protein 2/3 complex subunit 1B OS=Bos taurus GN=ARPC1B PE=1 SV=4;>tr|Q0V8E5|Q0V8E5_BOVIN Actin related protein 2/3	5	9	9	2	24.4	41.108	3.2e-73	51208000	89788000	48895000	63297000	182920000	124410000	52208000	119846000	1.89339	0.230921
C6JUQ0;D3K382;W5PMM7	>tr|C6JUQ0|C6JUQ0_SHEEP Protein disulfide-isomerase OS=Ovis aries GN=PDIA3 PE=2 SV=1;>tr|D3K382|D3K382_CAPHI Protein disulfide-isomerase OS=Capra hircus GN=Pdia3 PE=2 SV=1;>tr|W5PMM7|W5PMM7_SHEEP Protein disulfide-isomerase OS=Ovis aries GN=PDIA3 PE=3 SV=1	3	21	1	1	40.8	57.015	6.17e-186	339300000	229710000	377880000	315630000	247570000	175920000	289080000	2.37523e+08	0.752537	0.230931
W5PMR6;F1MQ07;L8IV93;Q71SS4;Q307E5	>tr|W5PMR6|W5PMR6_SHEEP Derlin OS=Ovis aries GN=DERL1 PE=3 SV=1;>tr|F1MQ07|F1MQ07_BOVIN Derlin OS=Bos taurus GN=DERL1 PE=3 SV=2;>tr|L8IV93|L8IV93_9CETA Derlin OS=Bos mutus GN=M91_20006 PE=3 SV=1;>sp|Q71SS4|DERL1_BOVIN Derlin-1 OS=Bos taurus GN=DERL1 PE=2 S	5	3	3	3	10.7	29.094	3.77e-08	32507000	34634000	67103000	44748000	22057000	31251000	31729000	2.83457e+07	0.633451	0.231201
F1MSF1;Q32LP1;W5NT70	>tr|F1MSF1|F1MSF1_BOVIN Ribonucleoside-diphosphate reductase OS=Bos taurus GN=RRM1 PE=3 SV=2;>tr|Q32LP1|Q32LP1_BOVIN Ribonucleoside-diphosphate reductase OS=Bos taurus GN=RRM1 PE=2 SV=2;>tr|W5NT70|W5NT70_SHEEP Ribonucleoside-diphosphate reductase OS=Ovis a	3	2	2	2	2.9	89.99	6e-06	5654200	7692000		6673100	8144000	8891700		8517850	1.27645	0.231284
A8E659;F1MAW1;W5PUB3;L8IDW6	>tr|A8E659|A8E659_BOVIN ANKH protein OS=Bos taurus GN=ANKH PE=2 SV=1;>tr|F1MAW1|F1MAW1_BOVIN Uncharacterized protein OS=Bos taurus GN=ANKH PE=4 SV=1;>tr|W5PUB3|W5PUB3_SHEEP Uncharacterized protein OS=Ovis aries GN=ANKH PE=4 SV=1;>tr|L8IDW6|L8IDW6_9CETA Pro	4	2	2	2	4.1	54.163	0.00031381	7053800	6866500		6960150	17477000	9681300		13579150	1.95099	0.231673
L8IE24;Q3T000;W5Q2V0	>tr|L8IE24|L8IE24_9CETA Synaptobrevin-like protein YKT6 OS=Bos mutus GN=M91_15820 PE=3 SV=1;>sp|Q3T000|YKT6_BOVIN Synaptobrevin homolog YKT6 OS=Bos taurus GN=YKT6 PE=2 SV=1;>tr|W5Q2V0|W5Q2V0_SHEEP Uncharacterized protein OS=Ovis aries GN=YKT6 PE=3 SV=1	3	2	2	2	13.1	22.466	2.02e-17	6048100	11789000	12264000	10033700	21979000	11803000		16891000	1.68343	0.231729
L8IFD5;G5E6P3;W5Q152	>tr|L8IFD5|L8IFD5_9CETA Guanine nucleotide-binding protein subunit alpha-13 OS=Bos mutus GN=M91_10356 PE=4 SV=1;>tr|G5E6P3|G5E6P3_BOVIN Uncharacterized protein OS=Bos taurus GN=GNA13 PE=4 SV=1;>tr|W5Q152|W5Q152_SHEEP Uncharacterized protein OS=Ovis aries G	3	13	12	12	43.7	44.375	8.69e-124	261540000	253710000	211220000	2.42157e+08	272940000	252050000	274070000	2.66353e+08	1.09992	0.232095
W5QH35;Q865V6;L8IRV6	>tr|W5QH35|W5QH35_SHEEP Uncharacterized protein OS=Ovis aries GN=CAPG PE=4 SV=1;>sp|Q865V6|CAPG_BOVIN Macrophage-capping protein OS=Bos taurus GN=CAPG PE=2 SV=1;>tr|L8IRV6|L8IRV6_9CETA Macrophage-capping protein (Fragment) OS=Bos mutus GN=M91_17790 PE=4 SV	3	9	9	9	25.8	43.593	1.42e-59	217840000	328660000	145560000	2.30687e+08	804800000	432650000	215180000	484210000	2.09899	0.232191
L8IZK5;Q32PB9;G3MY09;W5PUG3;W5P2U1	>tr|L8IZK5|L8IZK5_9CETA 60S ribosomal protein L38 (Fragment) OS=Bos mutus GN=M91_02368 PE=3 SV=1;>sp|Q32PB9|RL38_BOVIN 60S ribosomal protein L38 OS=Bos taurus GN=RPL38 PE=3 SV=4;>tr|G3MY09|G3MY09_BOVIN Uncharacterized protein OS=Bos taurus PE=3 SV=1;>tr|W5	5	4	4	4	47.1	8.2147	2.33e-10	26800000	95643000	42467000	54970000	109120000	98329000	63075000	9.01747e+07	1.64043	0.232564
W5PZB6;Q2TBV3;L8HM30	>tr|W5PZB6|W5PZB6_SHEEP Uncharacterized protein OS=Ovis aries GN=VSIG10L PE=4 SV=1;>sp|Q2TBV3|ETFB_BOVIN Electron transfer flavoprotein subunit beta OS=Bos taurus GN=ETFB PE=1 SV=3;>tr|L8HM30|L8HM30_9CETA Electron transfer flavoprotein subunit beta (Fragme	3	3	3	3	10.5	32.19	7.46e-08	19732000	13843000	22827000	1.88007e+07		21038000	42919000	31978500	1.70092	0.232648
L8I9E1;W5PBF2;Q0PEU9;F1MLD7;H7BWW4;L8IIM4;F1MPD4;W5Q9Y1	>tr|L8I9E1|L8I9E1_9CETA Protein EFR3-like protein A (Fragment) OS=Bos mutus GN=M91_08836 PE=4 SV=1;>tr|W5PBF2|W5PBF2_SHEEP Uncharacterized protein OS=Ovis aries GN=EFR3A PE=4 SV=1;>tr|Q0PEU9|Q0PEU9_BOVIN LOC535125 OS=Bos taurus PE=4 SV=1;>tr|F1MLD7|F1MLD7_	8	12	12	12	19.8	92.506	2.62e-75	77629000	44998000	47690000	5.67723e+07	65274000	69567000	89239000	7.46933e+07	1.31566	0.234013
A1L5B6;F6QVC9;L8IUS1;P81287;K4P221;W5PC69;Q9N1C2	>tr|A1L5B6|A1L5B6_BOVIN Annexin OS=Bos taurus GN=ANXA5 PE=2 SV=1;>tr|F6QVC9|F6QVC9_BOVIN Annexin OS=Bos taurus GN=ANXA5 PE=1 SV=1;>tr|L8IUS1|L8IUS1_9CETA Annexin OS=Bos mutus GN=M91_14990 PE=3 SV=1;>sp|P81287|ANXA5_BOVIN Annexin A5 OS=Bos taurus GN=ANXA5 P	7	17	17	2	57.6	36.073	4.27e-302	5020700000	1809200000	841510000	2.55714e+09	810940000	950000000	594830000	7.85257e+08	0.307084	0.234606
L8IA66;Q32KP1;W5P5M1	>tr|L8IA66|L8IA66_9CETA Tetraspanin-31 OS=Bos mutus GN=M91_11197 PE=3 SV=1;>sp|Q32KP1|TSN31_BOVIN Tetraspanin-31 OS=Bos taurus GN=TSPAN31 PE=2 SV=1;>tr|W5P5M1|W5P5M1_SHEEP Uncharacterized protein OS=Ovis aries GN=TSPAN31 PE=3 SV=1	3	1	1	1	4.8	22.874	0.00055947	9407800	11019000	16329000	1.22519e+07	8929600	10611000	7805300	9115300	0.743989	0.234754
W5Q7G1	>tr|W5Q7G1|W5Q7G1_SHEEP Uncharacterized protein OS=Ovis aries PE=3 SV=1	1	6	1	0	30.1	24.967	8.06e-37	29261000	23076000	36315000	2.95507e+07		36760000	168540000	102650000	3.47369	0.235202
W5NUY7;W5NUZ2;W5QA48;A8WFL6;L8IBB6;W5QAL5;E1BM64;W5NTQ9;L8I8Q9;L8IAI6	>tr|W5NUY7|W5NUY7_SHEEP Uncharacterized protein OS=Ovis aries GN=UTRN PE=4 SV=1	10	69	6	5	24.3	394.52	0	90491000	59490000	54872000	6.82843e+07	69187000	100600000	97993000	89260000	1.30718	0.235719
L8HZL7;W5PRR2;F1MCX1	>tr|L8HZL7|L8HZL7_9CETA Glypican-4 OS=Bos mutus GN=M91_01678 PE=3 SV=1;>tr|W5PRR2|W5PRR2_SHEEP Uncharacterized protein OS=Ovis aries GN=GPC4 PE=3 SV=1;>tr|F1MCX1|F1MCX1_BOVIN Uncharacterized protein OS=Bos taurus GN=GPC4 PE=1 SV=1	3	16	16	15	39.7	62.416	0	359690000	472780000	220560000	351010000	219430000	212280000	296580000	2.42763e+08	0.691614	0.236365
F1MD34;L8I9U3	>tr|F1MD34|F1MD34_BOVIN Uncharacterized protein OS=Bos taurus GN=FAM129B PE=4 SV=2;>tr|L8I9U3|L8I9U3_9CETA Niban-like protein 1 (Fragment) OS=Bos mutus GN=M91_07705 PE=4 SV=1	2	17	17	6	28	84.038	1.19e-267	79503000	150080000	94215000	1.07933e+08	718600000	273520000	102560000	3.64893e+08	3.38075	0.236886
Q0IIL6;Q68V19;W5NRH5;L8IU61	>tr|Q0IIL6|Q0IIL6_BOVIN Hydroxysteroid (17-beta) dehydrogenase 4 OS=Bos taurus GN=HSD17B4 PE=1 SV=1;>tr|Q68V19|Q68V19_BOVIN Multifunctional protein 2 OS=Bos taurus PE=2 SV=1;>tr|W5NRH5|W5NRH5_SHEEP Uncharacterized protein OS=Ovis aries GN=HSD17B4 PE=4 SV=1	4	6	6	6	11	79.557	1.42e-50	44280000	47015000	100070000	6.37883e+07		30702000	27784000	29243000	0.458438	0.237395
L8IRV5;A8E645;W5QEY8;F1MZY2;Q8WN68	>tr|L8IRV5|L8IRV5_9CETA Glucosamine--fructose-6-phosphate aminotransferase [isomerizing] 1 (Fragment) OS=Bos mutus GN=M91_09598 PE=4 SV=1;>tr|A8E645|A8E645_BOVIN GFPT1 protein OS=Bos taurus GN=GFPT1 PE=2 SV=1;>tr|W5QEY8|W5QEY8_SHEEP Uncharacterized protein	5	6	6	4	11	78.564	8.6e-47	34269000	41982000	43728000	39993000	94032000	34212000	64583000	6.42757e+07	1.60717	0.237831
F1MER7	>tr|F1MER7|F1MER7_BOVIN Uncharacterized protein OS=Bos taurus GN=HSPG2 PE=1 SV=1	1	31	31	12	9.9	466.02	6.42e-203	35794000	77162000	95338000	6.94313e+07		19740000	46466000	33103000	0.476773	0.239637
A4IFN6;L8J4W3	>tr|A4IFN6|A4IFN6_BOVIN Sorting nexin OS=Bos taurus GN=SNX18 PE=1 SV=1;>tr|L8J4W3|L8J4W3_9CETA Sorting nexin-18 (Fragment) OS=Bos mutus GN=M91_20204 PE=4 SV=1	2	9	9	3	15	69.178	1.02e-47	68840000	113530000	55482000	79284000	306430000	141210000	79635000	1.75758e+08	2.21682	0.239922
G5E631;W5NWP4;L8J0I6;D3IVZ2;D3IVZ3;C0L633;A0A089ZWL3;A0A089ZXF2;W5PCP3;A0A0B4RW62;F1MYC6;K0F576;K0FBM0;Q5W5U4;X5EYG3;A0A0B4RW65;K0FD10;A0A0B4RW57;A0A0B4RVR2;A0A0B4RVX4;K0FH98;L8J4E9;M1LMQ9;A0A090A137;A0A0K2G4X2;D6QZ48	>tr|G5E631|G5E631_BOVIN Uncharacterized protein OS=Bos taurus GN=DDX3X PE=1 SV=1;>tr|W5NWP4|W5NWP4_SHEEP Uncharacterized protein OS=Ovis aries GN=DDX3X PE=3 SV=1;>tr|L8J0I6|L8J0I6_9CETA ATP-dependent RNA helicase DDX3X (Fragment) OS=Bos mutus GN=M91_17213	26	23	23	22	43.1	73.127	7.96e-171	266770000	357060000	232780000	2.85537e+08	671550000	406470000	279210000	452410000	1.58442	0.241142
F1MYW7;L8J396;W5NS07;Q2KIZ2	>tr|F1MYW7|F1MYW7_BOVIN Uncharacterized protein OS=Bos taurus GN=HM13 PE=4 SV=1;>tr|L8J396|L8J396_9CETA Minor histocompatibility antigen H13 OS=Bos mutus GN=M91_18113 PE=4 SV=1;>tr|W5NS07|W5NS07_SHEEP Uncharacterized protein OS=Ovis aries GN=HM13 PE=4 SV=1	4	8	8	8	23.1	41.552	6.39e-80	292250000	212770000	561360000	355460000	111610000	228290000	255210000	198370000	0.558066	0.241345
L8I501;Q56JV9;W5QG75;G3N262;W5QGN8;W5P6A3;W5PA45;W5QE85;W5NU95;L8ILC9;Q862H3;Q862R1;W5Q8V4;E1BG39	>tr|L8I501|L8I501_9CETA 40S ribosomal protein S3a OS=Bos mutus GN=RPS3A PE=3 SV=1;>sp|Q56JV9|RS3A_BOVIN 40S ribosomal protein S3a OS=Bos taurus GN=RPS3A PE=2 SV=3;>tr|W5QG75|W5QG75_SHEEP 40S ribosomal protein S3a OS=Ovis aries GN=RPS3A PE=3 SV=1;>tr|G3N262	14	12	12	12	48.1	29.945	3.57e-90	401380000	449220000	156100000	3.35567e+08	832240000	765910000	250890000	6.16347e+08	1.83673	0.242528
L8J5D3;Q3SWZ3;W5PES0	>tr|L8J5D3|L8J5D3_9CETA Syntaxin-4 OS=Bos mutus GN=M91_19523 PE=3 SV=1;>sp|Q3SWZ3|STX4_BOVIN Syntaxin-4 OS=Bos taurus GN=STX4 PE=2 SV=1;>tr|W5PES0|W5PES0_SHEEP Uncharacterized protein OS=Ovis aries GN=STX4 PE=3 SV=1	3	8	8	8	27.6	34.4	3.11e-31	118440000	123320000	88302000	1.10021e+08	92484000	105640000	53875000	8.39997e+07	0.76349	0.242799
L8HQV1;Q3ZC13;W5QHF2;W5P9H1	>tr|L8HQV1|L8HQV1_9CETA AP-2 complex subunit mu-1 OS=Bos mutus GN=M91_03613 PE=3 SV=1;>sp|Q3ZC13|AP2M1_BOVIN AP-2 complex subunit mu OS=Bos taurus GN=AP2M1 PE=2 SV=1;>tr|W5QHF2|W5QHF2_SHEEP Uncharacterized protein OS=Ovis aries GN=AP2M1 PE=3 SV=1	4	12	12	12	30.2	52.171	7.88e-92	280410000	205370000	340340000	2.75373e+08	318420000	351900000	321980000	3.30767e+08	1.20116	0.242826
W5P983;L8I182;F1N7Q7	>tr|W5P983|W5P983_SHEEP Uncharacterized protein OS=Ovis aries GN=COL4A2 PE=3 SV=1;>tr|L8I182|L8I182_9CETA Collagen alpha-2(IV) chain (Fragment) OS=Bos mutus GN=M91_05799 PE=3 SV=1;>tr|F1N7Q7|F1N7Q7_BOVIN Collagen alpha-2(IV) chain OS=Bos taurus GN=COL4A2 P	3	1	1	1	0.8	165.32	0.0010325	96934000	109320000	144740000	116998000	140270000	148710000	126480000	1.38487e+08	1.18367	0.24346
L8J0U4;Q3ZBY4;W5NQP9	>tr|L8J0U4|L8J0U4_9CETA Fructose-bisphosphate aldolase (Fragment) OS=Bos mutus GN=M91_14627 PE=3 SV=1;>tr|Q3ZBY4|Q3ZBY4_BOVIN Fructose-bisphosphate aldolase OS=Bos taurus GN=ALDOC PE=1 SV=2;>tr|W5NQP9|W5NQP9_SHEEP Fructose-bisphosphate aldolase OS=Ovis ari	3	8	3	3	25.8	43.106	7.81e-135	59257000	54954000	31511000	48574000	322920000	145570000	29077000	1.65856e+08	3.41449	0.243726
A5D7P3;W5Q3A5;L8ISV5;P43033	>tr|A5D7P3|A5D7P3_BOVIN Platelet-activating factor acetylhydrolase IB subunit alpha OS=Bos taurus GN=PAFAH1B1 PE=2 SV=1;>tr|W5Q3A5|W5Q3A5_SHEEP Platelet-activating factor acetylhydrolase IB subunit alpha OS=Ovis aries GN=PAFAH1B1 PE=3 SV=1;>tr|L8ISV5|L8ISV	4	3	3	3	9.5	46.67	8.23e-13	9526600	16450000	10567000	12181200	16282000	15249000	14176000	1.52357e+07	1.25075	0.24431
W5PIY8;E1B970;L8IST5	>tr|W5PIY8|W5PIY8_SHEEP Uncharacterized protein OS=Ovis aries GN=GOLGA3 PE=4 SV=1;>tr|E1B970|E1B970_BOVIN Uncharacterized protein OS=Bos taurus GN=GOLGA3 PE=4 SV=1;>tr|L8IST5|L8IST5_9CETA Golgin subfamily A member 3 OS=Bos mutus GN=M91_11678 PE=4 SV=1	3	1	1	1	0.7	167.64	0.0027128	14077000	13172000	7299600	11516200		13249000	47421000	30335000	2.63412	0.244315
W5NZ70;A7E3W2;L8HQR6	>tr|W5NZ70|W5NZ70_SHEEP Uncharacterized protein OS=Ovis aries GN=LGALS3BP PE=4 SV=1;>sp|A7E3W2|LG3BP_BOVIN Galectin-3-binding protein OS=Bos taurus GN=LGALS3BP PE=1 SV=1;>tr|L8HQR6|L8HQR6_9CETA Galectin-3-binding protein OS=Bos mutus GN=M91_15860 PE=4 SV=1	3	3	3	3	9	59.862	2.07e-35	14489000	16048000	31928000	2.08217e+07		29765000	32884000	31324500	1.50442	0.245099
A1L5B7;W5PNR4;L8ILG8;Q2KJD1	>tr|A1L5B7|A1L5B7_BOVIN SERPINE1 mRNA binding protein 1 OS=Bos taurus GN=SERBP1 PE=1 SV=1;>tr|W5PNR4|W5PNR4_SHEEP Uncharacterized protein OS=Ovis aries GN=SERBP1 PE=4 SV=1;>tr|L8ILG8|L8ILG8_9CETA Plasminogen activator inhibitor 1 RNA-binding protein (Fragm	4	16	16	16	55.2	42.329	1.21e-258	164380000	342980000	148730000	2.18697e+08	726420000	525990000	144740000	4.65717e+08	2.12951	0.245409
Q3MHR7;W5QDZ3;F1MEL0;W5QCX5;W5PRB7	>sp|Q3MHR7|ARPC2_BOVIN Actin-related protein 2/3 complex subunit 2 OS=Bos taurus GN=ARPC2 PE=1 SV=1;>tr|W5QDZ3|W5QDZ3_SHEEP Arp2/3 complex 34 kDa subunit OS=Ovis aries PE=3 SV=1	5	13	13	13	48.3	34.349	4.94e-86	172060000	179320000	126410000	1.59263e+08	415850000	213910000	166660000	2.65473e+08	1.66688	0.245907
L8I9J7;Q3MHY1;W5QBH1	>tr|L8I9J7|L8I9J7_9CETA Cysteine and glycine-rich protein 1 OS=Bos mutus GN=M91_05568 PE=4 SV=1;>sp|Q3MHY1|CSRP1_BOVIN Cysteine and glycine-rich protein 1 OS=Bos taurus GN=CSRP1 PE=2 SV=3	3	8	8	8	52.3	20.612	6.45e-132	143320000	178790000	58094000	1.26735e+08	686650000	347400000	77796000	3.70615e+08	2.92434	0.246366
Q3ZBY7;W5Q2R1;B6UV64	>sp|Q3ZBY7|DEGS1_BOVIN Sphingolipid delta(4)-desaturase DES1 OS=Bos taurus GN=DEGS1 PE=2 SV=1;>tr|W5Q2R1|W5Q2R1_SHEEP Uncharacterized protein OS=Ovis aries PE=4 SV=1;>tr|B6UV64|B6UV64_SHEEP DEGS1 OS=Ovis aries GN=DEGS1 PE=2 SV=1	3	1	1	1	4.6	38.07	2.07e-31	29373000	21491000	56167000	35677000	23344000	22248000	18275000	21289000	0.596715	0.246462
C5IJA1;P62998;L8I7A1;F1MNG3;W5NVC9;A5PK69;L8J146;B0JYN9;Q9TU25;F1MCR0;L8I236;W5Q7P7;A5JSV6	>tr|C5IJA1|C5IJA1_SHEEP RAC1 OS=Ovis aries PE=2 SV=1;>sp|P62998|RAC1_BOVIN Ras-related C3 botulinum toxin substrate 1 OS=Bos taurus GN=RAC1 PE=1 SV=1;>tr|L8I7A1|L8I7A1_9CETA Ras-related C3 botulinum toxin substrate 1 (Fragment) OS=Bos mutus GN=M91_09359 PE	13	6	5	5	34.4	21.45	1.17e-18	326630000	300590000	360200000	329140000	378780000	539630000	333120000	4.17177e+08	1.26747	0.246832
A0A140T862;L8I4H9;Q5E9D0	>tr|A0A140T862|A0A140T862_BOVIN Eukaryotic translation initiation factor 2 subunit 2 OS=Bos taurus GN=EIF2S2 PE=4 SV=1;>tr|L8I4H9|L8I4H9_9CETA Eukaryotic translation initiation factor 2 subunit 2 (Fragment) OS=Bos mutus GN=M91_04410 PE=4 SV=1;>sp|Q5E9D0|IF	3	9	9	1	32.7	38.258	1.84e-128	78508000	113090000	61894000	8.44973e+07	172260000	133440000	76413000	127371000	1.5074	0.247084
L8I239;Q58DT4;W5Q8L1;L8HZC3;Q17QJ7;W5Q8M9	>tr|L8I239|L8I239_9CETA Pyrroline-5-carboxylate reductase (Fragment) OS=Bos mutus GN=M91_17333 PE=3 SV=1;>sp|Q58DT4|P5CR1_BOVIN Pyrroline-5-carboxylate reductase 1, mitochondrial OS=Bos taurus GN=PYCR1 PE=2 SV=1;>tr|W5Q8L1|W5Q8L1_SHEEP Pyrroline-5-carboxyl	6	7	7	7	27.8	34.233	1.11e-44	207370000	85921000	225520000	172937000	41541000	103780000	152670000	9.93303e+07	0.574373	0.247128
A6QNS6;F1MWN3	>tr|A6QNS6|A6QNS6_BOVIN NID1 protein OS=Bos taurus GN=NID1 PE=2 SV=1;>tr|F1MWN3|F1MWN3_BOVIN Uncharacterized protein OS=Bos taurus GN=NID1 PE=4 SV=2	2	6	6	1	5.5	136	1.25e-18	17426000	77371000	20867000	3.85547e+07	10929000	11881000	13932000	1.22473e+07	0.317662	0.247677
W5P1S6	>tr|W5P1S6|W5P1S6_SHEEP Dolichyl-diphosphooligosaccharide--protein glycosyltransferase subunit 1 OS=Ovis aries PE=3 SV=1	1	14	1	1	27.4	66.072	0	103030000	78896000	107830000	9.65853e+07	43825000	71676000	99622000	7.17077e+07	0.742428	0.248353
A4FV08;L8HNN4;W5NUG3;W5Q0A7;L8IP95;Q17QL1;W5Q0A8	>sp|A4FV08|GNPI1_BOVIN Glucosamine-6-phosphate isomerase 1 OS=Bos taurus GN=GNPDA1 PE=2 SV=1;>tr|L8HNN4|L8HNN4_9CETA Glucosamine-6-phosphate isomerase OS=Bos mutus GN=M91_17239 PE=3 SV=1;>tr|W5NUG3|W5NUG3_SHEEP Glucosamine-6-phosphate isomerase OS=Ovis ari	7	1	1	1	4.2	32.58	0.0011724	14026000	12907000	24100000	17011000	5925400	13002000		9463700	0.556328	0.249491
L8IWB2;A6QNT8;W5PXH3	>tr|L8IWB2|L8IWB2_9CETA Protein transport protein Sec24A OS=Bos mutus GN=M91_21047 PE=4 SV=1;>sp|A6QNT8|SC24A_BOVIN Protein transport protein Sec24A OS=Bos taurus GN=SEC24A PE=2 SV=1;>tr|W5PXH3|W5PXH3_SHEEP Uncharacterized protein OS=Ovis aries GN=SEC24A P	3	5	4	4	5.3	120.22	5.36e-12	5870700	15652000		10761350	43221000	19486000		31353500	2.91353	0.249854
W5P5I4;Q3T132;L8IFH6	>tr|W5P5I4|W5P5I4_SHEEP Uncharacterized protein OS=Ovis aries PE=4 SV=1;>sp|Q3T132|LTOR2_BOVIN Ragulator complex protein LAMTOR2 OS=Bos taurus GN=LAMTOR2 PE=2 SV=1;>tr|L8IFH6|L8IFH6_9CETA Mitogen-activated protein-binding protein-interacting protein (Fragm	3	4	4	4	24.6	21.36	3.87e-25	38519000	28137000	37347000	3.46677e+07	36450000	39190000	54060000	4.32333e+07	1.24708	0.250548
F1MG05;Q3SZV3;Q1JPA2;L8I358;L8J401;Q862B9;Q862P4;Q862P6;Q862H1	>tr|F1MG05|F1MG05_BOVIN Elongation factor 1-gamma OS=Bos taurus GN=EEF1G PE=4 SV=1;>sp|Q3SZV3|EF1G_BOVIN Elongation factor 1-gamma OS=Bos taurus GN=EEF1G PE=2 SV=1;>tr|Q1JPA2|Q1JPA2_BOVIN Eukaryotic translation elongation factor 1 gamma (Fragment) OS=Bos t	9	16	1	1	43.6	50.361	2.07e-199	60013000	87918000		73965500	202000000	124750000	86643000	1.37798e+08	1.863	0.251299
L8ILY2;H7BWV9;Q3SZG2;W5PT12;Q56JV7;L8J3E0;P62866;E1BH19	>tr|L8ILY2|L8ILY2_9CETA 40S ribosomal protein S30 (Fragment) OS=Bos mutus GN=M91_15953 PE=3 SV=1;>tr|H7BWV9|H7BWV9_BOVIN 40S ribosomal protein S30 OS=Bos taurus PE=3 SV=1;>tr|Q3SZG2|Q3SZG2_BOVIN 40S ribosomal protein S30 OS=Bos taurus GN=FAU PE=2 SV=1;>tr|	8	2	2	2	12.6	14.59	3.48e-05	62575000	118670000	53984000	7.84097e+07	177870000	201640000	55092000	1.44867e+08	1.84757	0.252405
L8IW92;F1N371;W5PI56;Q2NKR4;Q0V8I0	>tr|L8IW92|L8IW92_9CETA Disabled-like protein 2 OS=Bos mutus GN=M91_07750 PE=4 SV=1;>tr|F1N371|F1N371_BOVIN Uncharacterized protein OS=Bos taurus GN=DAB2 PE=4 SV=1;>tr|W5PI56|W5PI56_SHEEP Uncharacterized protein OS=Ovis aries GN=DAB2 PE=4 SV=1	5	14	14	14	24.9	82.739	2.04e-128	27409000	29121000	31588000	2.93727e+07	264650000	94737000	19324000	126237000	4.29777	0.252803
L8IPR8;Q08DI5;W5PSD7	>tr|L8IPR8|L8IPR8_9CETA Ras-related protein Rap-2c OS=Bos mutus GN=M91_16468 PE=4 SV=1;>sp|Q08DI5|RAP2C_BOVIN Ras-related protein Rap-2c OS=Bos taurus GN=RAP2C PE=2 SV=1;>tr|W5PSD7|W5PSD7_SHEEP Uncharacterized protein OS=Ovis aries GN=RAP2C PE=4 SV=1	3	9	9	6	59.6	20.745	1.1e-166	431920000	253550000	367770000	351080000	262590000	265350000	308440000	2.78793e+08	0.794102	0.253428
W5PQZ7;L8HZ33;F1N1E7;Q0V8I1	>tr|W5PQZ7|W5PQZ7_SHEEP Uncharacterized protein OS=Ovis aries GN=PATL1 PE=4 SV=1;>tr|L8HZ33|L8HZ33_9CETA Protein PAT1-like protein 1 (Fragment) OS=Bos mutus GN=M91_20071 PE=4 SV=1;>tr|F1N1E7|F1N1E7_BOVIN Uncharacterized protein OS=Bos taurus GN=PATL1 PE=4	4	2	2	2	2	89.425	0.00029935	36808000	79129000	44470000	53469000	48551000	30837000	18148000	32512000	0.608053	0.253436
W5PL43;W5PVA8;W5NXN6;W5PE93;L8IGI1;Q56JX5;Q6Q311;A0A0A0MPA4;L8HU39;L8IYH0;L8I9C7;W5PJ67;E1BE67;A0A0A0MPA7;L8ICR1	>tr|W5PL43|W5PL43_SHEEP Uncharacterized protein OS=Ovis aries PE=4 SV=1;>tr|W5PVA8|W5PVA8_SHEEP 40S ribosomal protein S25 OS=Ovis aries GN=LOC101110758 PE=4 SV=1;>tr|W5NXN6|W5NXN6_SHEEP Uncharacterized protein OS=Ovis aries PE=4 SV=1;>tr|W5PE93|W5PE93_SHEE	15	5	5	5	27.7	14.858	1.28e-15	153110000	187660000	154750000	1.65173e+08	316850000	355660000	118870000	2.63793e+08	1.59707	0.254453
O46375;P12303	>sp|O46375|TTHY_BOVIN Transthyretin OS=Bos taurus GN=TTR PE=1 SV=1;>sp|P12303|TTHY_SHEEP Transthyretin OS=Ovis aries GN=TTR PE=2 SV=1	2	4	4	1	41.5	15.727	6.27e-30	23314000	19202000	25666000	2.27273e+07	75475000	30202000	25955000	4.38773e+07	1.9306	0.255699
A2VE06;L8IUS4	>tr|A2VE06|A2VE06_BOVIN 40S ribosomal protein S4 OS=Bos taurus GN=RPS4Y1 PE=2 SV=1;>tr|L8IUS4|L8IUS4_9CETA 40S ribosomal protein S4 OS=Bos mutus GN=M91_20668 PE=3 SV=1	2	13	13	1	51	29.595	2.13e-88	373510000	438270000	214960000	3.42247e+08	906400000	772180000	221710000	633430000	1.8508	0.255729
A4FUZ6;F1MF48;W5P972;W5P973;L8HXA0	>sp|A4FUZ6|HSDL2_BOVIN Hydroxysteroid dehydrogenase-like protein 2 OS=Bos taurus GN=HSDL2 PE=2 SV=1;>tr|F1MF48|F1MF48_BOVIN Hydroxysteroid dehydrogenase-like protein 2 OS=Bos taurus GN=HSDL2 PE=1 SV=2;>tr|W5P972|W5P972_SHEEP Uncharacterized protein OS=Ovis	5	2	2	2	4.8	45.149	8.37e-07	24934000	10944000	13884000	1.65873e+07	11517000	9883000	11311000	1.09037e+07	0.657349	0.2558
A6H769;L8IZV7;W5P5T8	>sp|A6H769|RS7_BOVIN 40S ribosomal protein S7 OS=Bos taurus GN=RPS7 PE=2 SV=1;>tr|L8IZV7|L8IZV7_9CETA 40S ribosomal protein S7 OS=Bos mutus GN=M91_04263 PE=4 SV=1;>tr|W5P5T8|W5P5T8_SHEEP Uncharacterized protein OS=Ovis aries PE=4 SV=1	3	9	9	9	60.3	22.127	0	615330000	725490000	378290000	5.73037e+08	972070000	973320000	509730000	8.18373e+08	1.42813	0.255933
L8HNT9;Q95KV7;W5PD03	>tr|L8HNT9|L8HNT9_9CETA NADH dehydrogenase [ubiquinone] 1 alpha subcomplex subunit 13 (Fragment) OS=Bos mutus GN=M91_19318 PE=4 SV=1;>sp|Q95KV7|NDUAD_BOVIN NADH dehydrogenase [ubiquinone] 1 alpha subcomplex subunit 13 OS=Bos taurus GN=NDUFA13 PE=1 SV=3;>tr	3	3	3	3	18.4	18.796	1.55e-06	11126000		17640000	14383000	7000300		10281000	8640650	0.600754	0.256009
L8IXK2;A5YVD9;Q3ZBZ1;W5P7W2;W5P7W0;F1MKI5	>tr|L8IXK2|L8IXK2_9CETA 45 kDa calcium-binding protein (Fragment) OS=Bos mutus GN=M91_10934 PE=4 SV=1;>sp|A5YVD9|CAB45_CAPHI 45 kDa calcium-binding protein OS=Capra hircus GN=SDF4 PE=2 SV=1;>sp|Q3ZBZ1|CAB45_BOVIN 45 kDa calcium-binding protein OS=Bos tauru	6	4	4	4	19.4	41.177	2.25e-23	20341000	13699000	37139000	2.37263e+07	13412000	8160900	19177000	13583300	0.572499	0.256374
L8IL20;Q3T0S7;W5QHQ1	>tr|L8IL20|L8IL20_9CETA Uncharacterized protein OS=Bos mutus GN=M91_14397 PE=4 SV=1;>tr|Q3T0S7|Q3T0S7_BOVIN Chromosome 14 open reading frame 166 ortholog OS=Bos taurus GN=C10H14ORF166 PE=2 SV=1;>tr|W5QHQ1|W5QHQ1_SHEEP Uncharacterized protein OS=Ovis aries	3	7	7	7	34.3	28.209	1.55e-54	88765000	78263000	49934000	7.23207e+07	137010000	120280000	61494000	1.06261e+08	1.46931	0.256607
L8HMG0;Q5E9E6;W5PQX4;W5Q5K4;W5Q688;W5PXK5;W5P0Z0;G3X7N2;W5PR27;W5QF90;E1BKD0;G1DFT0;W5PGY5;W5Q574;W5P5Z5;Q862M2;L8J0D7	>tr|L8HMG0|L8HMG0_9CETA Ribosomal protein (Fragment) OS=Bos mutus GN=M91_19453 PE=3 SV=1;>sp|Q5E9E6|RL10A_BOVIN 60S ribosomal protein L10a OS=Bos taurus GN=RPL10A PE=2 SV=3;>tr|W5PQX4|W5PQX4_SHEEP Ribosomal protein OS=Ovis aries GN=RPL10A PE=3 SV=1;>tr|W5Q	17	8	8	8	33.8	27.417	1.05e-63	346110000	417300000	215310000	326240000	563650000	471700000	314820000	4.50057e+08	1.37953	0.256782
E1BFI4;W5QH89;L8I3Q0;REV__W5Q7K6;E1BKJ7;L8IUQ7;M4R4L7;W5P966	>tr|E1BFI4|E1BFI4_BOVIN Uncharacterized protein OS=Bos taurus GN=IGF2BP2 PE=4 SV=2;>tr|W5QH89|W5QH89_SHEEP Uncharacterized protein OS=Ovis aries GN=IGF2BP2 PE=4 SV=1;>tr|L8I3Q0|L8I3Q0_9CETA Insulin-like growth factor 2 mRNA-binding protein 2 OS=Bos mutus G	8	8	8	7	16.7	66.009	7.38e-35	12692000	11632000	10610000	1.16447e+07	155910000	30426000	20639000	6.89917e+07	5.92474	0.258325
Q3T119;Q8HZV2;W5PUL5;L8I2U1;A0A0B4J192;W5P0Y0;A0A0Y0QPD5;A0A0Y0R0F4;A0A110AZ43	>tr|Q3T119|Q3T119_BOVIN FCGRT protein OS=Bos taurus GN=FCGRT PE=2 SV=1;>tr|Q8HZV2|Q8HZV2_SHEEP Neonatal Fc receptor alpha chain OS=Ovis aries GN=FcRn PE=2 SV=1;>tr|W5PUL5|W5PUL5_SHEEP Uncharacterized protein OS=Ovis aries GN=FCGRT PE=4 SV=1;>tr|L8I2U1|L8I2	9	2	2	2	4.2	39.142	0.00061991	34947000	20889000	14151000	23329000	16029000	6607700		11318350	0.485162	0.259247
L8J0C6;Q0III3;W5NUY8;W5NUZ1;F1N7H7	>tr|L8J0C6|L8J0C6_9CETA Cytoplasmic dynein 1 intermediate chain 2 OS=Bos mutus GN=M91_01852 PE=4 SV=1;>sp|Q0III3|DC1I2_BOVIN Cytoplasmic dynein 1 intermediate chain 2 OS=Bos taurus GN=DYNC1I2 PE=1 SV=1;>tr|W5NUY8|W5NUY8_SHEEP Uncharacterized protein OS=Ovi	5	8	8	8	20.5	72.597	2.1e-66	30966000	36046000	39367000	3.54597e+07	91253000	44571000	37611000	5.78117e+07	1.63035	0.25929
L8I1I1;Q9BGI2;W5Q532	>tr|L8I1I1|L8I1I1_9CETA Peroxiredoxin-4 OS=Bos mutus GN=M91_18202 PE=4 SV=1;>sp|Q9BGI2|PRDX4_BOVIN Peroxiredoxin-4 OS=Bos taurus GN=PRDX4 PE=2 SV=1;>tr|W5Q532|W5Q532_SHEEP Uncharacterized protein OS=Ovis aries GN=PRDX4 PE=4 SV=1	3	8	5	5	30.7	30.741	4.82e-38	390560000	477940000	636720000	501740000	428660000	356380000	422500000	4.02513e+08	0.802235	0.259976
Q2HJG5;L8ITE0;W5Q1R1;L8IFK7	>sp|Q2HJG5|VPS35_BOVIN Vacuolar protein sorting-associated protein 35 OS=Bos taurus GN=VPS35 PE=2 SV=1;>tr|L8ITE0|L8ITE0_9CETA Vacuolar protein sorting-associated protein 35 (Fragment) OS=Bos mutus GN=M91_08257 PE=4 SV=1;>tr|W5Q1R1|W5Q1R1_SHEEP Uncharacter	4	19	19	19	26.1	91.75	3.83e-83	64245000	109120000	46582000	7.33157e+07	445060000	137500000	85063000	222541000	3.03538	0.260024
W5QI60;Q10741;W5QI59;L8IX70;W5NWJ9	>tr|W5QI60|W5QI60_SHEEP Uncharacterized protein OS=Ovis aries GN=ADAM10 PE=4 SV=1;>sp|Q10741|ADA10_BOVIN Disintegrin and metalloproteinase domain-containing protein 10 OS=Bos taurus GN=ADAM10 PE=1 SV=1;>tr|W5QI59|W5QI59_SHEEP Uncharacterized protein OS=Ovi	5	2	2	2	3.9	84.59	4.57e-10	24285000	8134100	26829000	1.97494e+07	23938000	48207000		36072500	1.82651	0.260096
L8I1S4	>tr|L8I1S4|L8I1S4_9CETA Drebrin-like protein OS=Bos mutus GN=M91_00297 PE=4 SV=1	1	4	1	1	12.7	49.356	1.26e-09	3020300	4167900	2320900	3169700	7488200	7718400	1977700	5728100	1.80714	0.260179
F1MCT8;W5PUJ4;L8ICT1;A7E355	>tr|F1MCT8|F1MCT8_BOVIN Uncharacterized protein OS=Bos taurus GN=SYNCRIP PE=1 SV=2;>tr|W5PUJ4|W5PUJ4_SHEEP Uncharacterized protein OS=Ovis aries GN=SYNCRIP PE=4 SV=1;>tr|L8ICT1|L8ICT1_9CETA Heterogeneous nuclear ribonucleoprotein Q OS=Bos mutus GN=M91_2060	4	19	19	13	36.2	71.174	2.35e-188	381340000	356370000	182170000	3.06627e+08	673810000	615160000	230430000	5.06467e+08	1.65174	0.260263
F1MV07;L8IGV8	>tr|F1MV07|F1MV07_BOVIN Uncharacterized protein OS=Bos taurus GN=SEC24D PE=4 SV=2;>tr|L8IGV8|L8IGV8_9CETA Protein transport protein Sec24D OS=Bos mutus GN=M91_05317 PE=4 SV=1	2	11	11	1	14.2	112.46	3.54e-72	23267000	50432000	13034000	28911000	141300000	72910000	18682000	7.76307e+07	2.68516	0.260344
E1BNR0;G5CW09;G5CW10;G5CW12;G5CW07;Q7YQR2;F1N3N1	>tr|E1BNR0|E1BNR0_BOVIN Uncharacterized protein OS=Bos taurus GN=APOB PE=1 SV=2	7	95	95	40	25	515.75	0	271570000	3440700000	1058200000	1.59016e+09	537980000	262360000	205770000	335370000	0.210904	0.260524
L8IY39;A9LM13;Q3ZBG1;W5P645;W5P648	>tr|L8IY39|L8IY39_9CETA Ras-related protein Rab-14 (Fragment) OS=Bos mutus GN=M91_04257 PE=4 SV=1;>tr|A9LM13|A9LM13_CAPHI RAB14 OS=Capra hircus GN=rab14 PE=2 SV=1;>tr|Q3ZBG1|Q3ZBG1_BOVIN RAB14 protein OS=Bos taurus GN=RAB14 PE=1 SV=2;>tr|W5P645|W5P645_SHEE	5	11	11	11	66.1	24.156	1.92e-99	208400000	250670000	220330000	2.26467e+08	288080000	235620000	238610000	2.54103e+08	1.12203	0.26153
A2VE41;L8IWC2;W5NVG2	>tr|A2VE41|A2VE41_BOVIN EGF-containing fibulin-like extracellular matrix protein 1 OS=Bos taurus GN=EFEMP1 PE=1 SV=1;>tr|L8IWC2|L8IWC2_9CETA EGF-containing fibulin-like extracellular matrix protein 1 OS=Bos mutus GN=M91_19370 PE=4 SV=1;>tr|W5NVG2|W5NVG2_SH	3	6	6	6	18.5	54.835	2.57e-41	26510000	20596000	33786000	26964000		22787000	15762000	19274500	0.714823	0.261784
W5PBS4	>tr|W5PBS4|W5PBS4_SHEEP Uncharacterized protein OS=Ovis aries GN=LRP1 PE=4 SV=1	1	120	4	4	34.8	502.55	0	76881000	75476000	182480000	1.11612e+08	89957000	62966000	24793000	5.92387e+07	0.530754	0.262202
L8ILS9;Q3SYW6;W5NY25;L8J192	>tr|L8ILS9|L8ILS9_9CETA Eukaryotic translation initiation factor 3 subunit C OS=Bos mutus GN=EIF3C PE=3 SV=1;>sp|Q3SYW6|EIF3C_BOVIN Eukaryotic translation initiation factor 3 subunit C OS=Bos taurus GN=EIF3C PE=2 SV=1;>tr|W5NY25|W5NY25_SHEEP Eukaryotic tra	4	21	21	21	26	105.38	1.87e-154	148980000	166860000	92047000	1.35962e+08	591980000	276660000	103790000	3.24143e+08	2.38407	0.263252
W5PR81;L8J078;Q3ZBV8	>tr|W5PR81|W5PR81_SHEEP Uncharacterized protein OS=Ovis aries GN=TARS PE=3 SV=1;>tr|L8J078|L8J078_9CETA Threonyl-tRNA synthetase, cytoplasmic OS=Bos mutus GN=M91_05512 PE=3 SV=1;>sp|Q3ZBV8|SYTC_BOVIN Threonine--tRNA ligase, cytoplasmic OS=Bos taurus GN=TAR	3	14	14	14	23.1	83.403	3.33e-63	81505000	113000000	18691000	7.10653e+07	49775000	34599000	12872000	3.24153e+07	0.456134	0.263266
W5Q9Z9;L8INI1;Q58DW0;G3MXR5;Q30B85;L8ICN4;W5P0J1;L8ISR4;W5NQG4;L8IAY8;Q30DQ2	>tr|W5Q9Z9|W5Q9Z9_SHEEP Uncharacterized protein OS=Ovis aries GN=RPL4 PE=4 SV=1;>tr|L8INI1|L8INI1_9CETA 60S ribosomal protein L4 (Fragment) OS=Bos mutus GN=M91_20536 PE=4 SV=1;>sp|Q58DW0|RL4_BOVIN 60S ribosomal protein L4 OS=Bos taurus GN=RPL4 PE=2 SV=3;>t	11	17	17	17	40.7	49.137	1.02e-119	850580000	888070000	488770000	7.42473e+08	1154500000	1276300000	671220000	1.03401e+09	1.39265	0.263682
E1BLZ8;L8I6W2;W5Q0Z1;L8ITW1	>tr|E1BLZ8|E1BLZ8_BOVIN Eukaryotic translation initiation factor 3 subunit F OS=Bos taurus GN=EIF3F PE=1 SV=2;>tr|L8I6W2|L8I6W2_9CETA Eukaryotic translation initiation factor 3 subunit F OS=Bos mutus GN=EIF3F PE=3 SV=1;>tr|W5Q0Z1|W5Q0Z1_SHEEP Eukaryotic tr	4	9	9	9	31.2	40.188	3.58e-104	61757000	97127000	46448000	68444000	363620000	122350000	72614000	1.86195e+08	2.72039	0.26583
W5NSZ5;A5D7S6;L8HXR6	>tr|W5NSZ5|W5NSZ5_SHEEP Uncharacterized protein OS=Ovis aries GN=PEF1 PE=4 SV=1;>tr|A5D7S6|A5D7S6_BOVIN PEF1 protein OS=Bos taurus GN=PEF1 PE=2 SV=1	3	5	5	5	15	30.311	3.7e-21	56220000	28701000	37795000	4.09053e+07	31311000	36581000	13049000	2.69803e+07	0.65958	0.266296
F1MDM4;Q29RM3;W5Q3E9;L8I4A4	>tr|F1MDM4|F1MDM4_BOVIN Receptor expression-enhancing protein OS=Bos taurus GN=REEP5 PE=3 SV=1;>sp|Q29RM3|REEP5_BOVIN Receptor expression-enhancing protein 5 OS=Bos taurus GN=REEP5 PE=2 SV=1	4	3	3	3	12.7	21.429	9.58e-07	102120000	89997000	221190000	137769000	42477000	67302000	119480000	7.64197e+07	0.554694	0.267042
E1BC38;W5P1J0	>tr|E1BC38|E1BC38_BOVIN Uncharacterized protein OS=Bos taurus GN=CD248 PE=4 SV=2;>tr|W5P1J0|W5P1J0_SHEEP Uncharacterized protein OS=Ovis aries GN=CD248 PE=4 SV=1	2	10	10	4	12.7	81.19	3.65e-22	16600000	51634000	18121000	28785000	344860000	99147000	21447000	1.55151e+08	5.39001	0.267322
L8HVI2;Q3T0Q6;W5P067;W5P7H9	>tr|L8HVI2|L8HVI2_9CETA Cellular nucleic acid-binding protein OS=Bos mutus GN=M91_00922 PE=4 SV=1;>sp|Q3T0Q6|CNBP_BOVIN Cellular nucleic acid-binding protein OS=Bos taurus GN=CNBP PE=2 SV=1;>tr|W5P067|W5P067_SHEEP Uncharacterized protein OS=Ovis aries GN=C	4	8	8	8	50.3	19.463	1.74e-44	13317000	24935000	14263000	17505000	242260000	53818000	21605000	1.05894e+08	6.04938	0.268916
L8HWY4;Q5E966;W5NQ14	>tr|L8HWY4|L8HWY4_9CETA Eukaryotic translation initiation factor 3 subunit I (Fragment) OS=Bos mutus GN=M91_11095 PE=3 SV=1;>sp|Q5E966|EIF3I_BOVIN Eukaryotic translation initiation factor 3 subunit I OS=Bos taurus GN=EIF3I PE=2 SV=1;>tr|W5NQ14|W5NQ14_SHEEP	3	11	11	11	48.3	36.469	6.82e-96	59117000	70074000	41633000	5.69413e+07	264640000	116540000	42272000	1.41151e+08	2.47888	0.270326
L8IR22;Q3ZBX0;W5PG64	>tr|L8IR22|L8IR22_9CETA Basigin OS=Bos mutus GN=M91_01904 PE=4 SV=1;>tr|Q3ZBX0|Q3ZBX0_BOVIN Basigin OS=Bos taurus GN=BSG PE=1 SV=1;>tr|W5PG64|W5PG64_SHEEP Uncharacterized protein OS=Ovis aries GN=BSG PE=4 SV=1	3	4	4	4	15.9	29.744	3.34e-51	458840000	324820000	534810000	439490000	299720000	441250000	263730000	334900000	0.76202	0.270563
E3VW85;W5Q6M7;P15241	>tr|E3VW85|E3VW85_SHEEP Keratin 83 OS=Ovis aries PE=2 SV=1;>tr|W5Q6M7|W5Q6M7_SHEEP Uncharacterized protein OS=Ovis aries GN=LOC100526780 PE=3 SV=1;>sp|P15241|K2M2_SHEEP Keratin, type II microfibrillar, component 7C OS=Ovis aries PE=1 SV=1	3	31	30	3	62.9	53.916	0		20628000000	34499000	10331249500	1918800	5789900	6468500	4.72573e+06	0.000457421	0.271117
G3X745	>sp|G3X745|GPC1_BOVIN Glypican-1 OS=Bos taurus GN=GPC1 PE=2 SV=1	1	15	15	3	36.5	61.007	8.54e-229	397590000	2830100000	970100000	1.39926e+09	679600000	446670000	216480000	4.47583e+08	0.319871	0.271286
B7TJ13;L8IZX3;Q3T0P6;W5QBV3;Q58DJ6;G3X7N4;Q862Q5;Q9GK71	>tr|B7TJ13|B7TJ13_SHEEP Phosphoglycerate kinase OS=Ovis aries GN=PGK1 PE=2 SV=1;>tr|L8IZX3|L8IZX3_9CETA Phosphoglycerate kinase OS=Bos mutus GN=M91_04375 PE=3 SV=1;>sp|Q3T0P6|PGK1_BOVIN Phosphoglycerate kinase 1 OS=Bos taurus GN=PGK1 PE=2 SV=3;>tr|W5QBV3|W	8	14	14	8	42.4	44.565	3.6e-122	327090000	379270000	194190000	3.00183e+08	282400000	212770000	147220000	214130000	0.713331	0.27149
F1MUT6;Q2YDF3;L8IM22;Q3ZBV2;W5P534;W5P535;L8ILG2;Q58DE5	>tr|F1MUT6|F1MUT6_BOVIN Uncharacterized protein OS=Bos taurus GN=DDX19B PE=4 SV=1;>tr|Q2YDF3|Q2YDF3_BOVIN DEAD (Asp-Glu-Ala-As) box polypeptide 19B OS=Bos taurus GN=DDX19B PE=2 SV=1;>tr|L8IM22|L8IM22_9CETA ATP-dependent RNA helicase DDX19A OS=Bos mutus GN=	8	4	4	4	9.5	54.458	8.44e-18	14099000	25412000	11040000	1.68503e+07	28123000	21954000		25038500	1.48593	0.271607
P02584;E1BHJ0;W5P6Q5;L8HZW1;L8IIJ9;W5PYC5	>sp|P02584|PROF1_BOVIN Profilin-1 OS=Bos taurus GN=PFN1 PE=1 SV=2;>tr|E1BHJ0|E1BHJ0_BOVIN Profilin OS=Bos taurus PE=3 SV=1;>tr|W5P6Q5|W5P6Q5_SHEEP Profilin OS=Ovis aries PE=3 SV=1;>tr|L8HZW1|L8HZW1_9CETA Profilin (Fragment) OS=Bos mutus GN=M91_06885 PE=3 S	6	8	8	8	77.1	15.057	1.77e-72	670590000	757030000	355960000	5.94527e+08	502990000	484030000	194820000	3.93947e+08	0.662622	0.271704
Q30B70	>tr|Q30B70|Q30B70_SHEEP Elongation factor-1 alpha (Fragment) OS=Ovis aries PE=2 SV=1	1	12	1	1	77.7	19.126	0	11067000		9641800	10354400	9289100	102700000	59094000	57027700	5.50758	0.272821
W5PW97;L8HM36;P62194;W5Q6Z1;L8IBC4;W5Q6Z3;F1MFP1	>tr|W5PW97|W5PW97_SHEEP Uncharacterized protein OS=Ovis aries GN=PSMC5 PE=3 SV=1;>tr|L8HM36|L8HM36_9CETA 26S protease regulatory subunit 8 (Fragment) OS=Bos mutus GN=M91_15246 PE=3 SV=1;>sp|P62194|PRS8_BOVIN 26S protease regulatory subunit 8 OS=Bos taurus	7	8	8	8	22.8	46.323	7.33e-72	47066000	45354000	25169000	3.91963e+07	39190000	25059000	16720000	2.69897e+07	0.688576	0.27307
W5P4G1;E1BPA0;L8IR51;W5P4G2	>tr|W5P4G1|W5P4G1_SHEEP Uncharacterized protein OS=Ovis aries GN=PTPRA PE=4 SV=1;>tr|E1BPA0|E1BPA0_BOVIN Receptor-type tyrosine-protein phosphatase OS=Bos taurus GN=PTPRA PE=3 SV=2;>tr|L8IR51|L8IR51_9CETA Receptor-type tyrosine-protein phosphatase OS=Bos m	4	4	4	4	7.5	91.419	6.59e-12	10439000	12470000		11454500	20288000	13376000		16832000	1.46947	0.274025
L8IP29;E1BCW0;W5PVH9	>tr|L8IP29|L8IP29_9CETA Hepatocyte growth factor activator OS=Bos mutus GN=M91_16652 PE=3 SV=1;>tr|E1BCW0|E1BCW0_BOVIN Uncharacterized protein OS=Bos taurus PE=3 SV=2	3	3	3	3	5.2	69.64	4.83e-07		51545000	21752000	36648500	15483000	13285000		14384000	0.392485	0.274558
O62654;W5QG29;L8IXU2;Q862F7;W5QC27	>sp|O62654|DESM_BOVIN Desmin OS=Bos taurus GN=DES PE=2 SV=3;>tr|W5QG29|W5QG29_SHEEP Uncharacterized protein OS=Ovis aries GN=DES PE=3 SV=1;>tr|L8IXU2|L8IXU2_9CETA Desmin (Fragment) OS=Bos mutus GN=M91_13962 PE=3 SV=1	5	20	17	17	53	53.531	7.59e-146	3614000	32558000	9593000	15255000		10677000	1252900000	631788500	41.4152	0.275201
A7MBD4;L8I9M9	>tr|A7MBD4|A7MBD4_BOVIN FARSA protein OS=Bos taurus GN=FARSA PE=2 SV=1;>tr|L8I9M9|L8I9M9_9CETA Phenylalanyl-tRNA synthetase alpha chain OS=Bos mutus GN=M91_12624 PE=4 SV=1	2	7	1	1	16.5	57.494	1.96e-84	13636000	10675000		12155500	16324000	13780000		15052000	1.23829	0.276089
Q17QG8;W5Q6F0;W5PT38;L8I0J0;W5QFL9;L8HZR0;W5QAA6;A0A0A0MP90;A0A0A0MPA2;A4IFU5;F2Z4G5;F2Z4I6;F2Z4J1;G8JL00;L8HPG7;L8IQ83;L8IQP7;P0C0S9;W5PHK5;W5QFN5;A1A4R1;L8I372;Q3ZBX9;W5PUU8;W5QGA9;L8I5K2;W5QFM1;W5NTP4;E1BH22;F1MRN2;L8IKS0;W5PV69;A0A0A0MP93;F1MLQ1;L8IQM9;Q533U8;A7E366;Q2QJG7;Q2VT23	>tr|Q17QG8|Q17QG8_BOVIN Histone H2A OS=Bos taurus GN=H2AFX PE=2 SV=1;>tr|W5Q6F0|W5Q6F0_SHEEP Histone H2A OS=Ovis aries GN=H2AFX PE=3 SV=1;>tr|W5PT38|W5PT38_SHEEP Histone H2A OS=Ovis aries GN=LOC101111669 PE=3 SV=1;>tr|L8I0J0|L8I0J0_9CETA Histone H2A (Fragm	39	3	1	0	24.5	15.128	2.13e-28	244460000	129520000	38692000	1.37557e+08	61001000	2010900		31505950	0.229039	0.276586
L8HZP4;P63258	>tr|L8HZP4|L8HZP4_9CETA Actin, cytoplasmic 2 OS=Bos mutus GN=M91_17356 PE=3 SV=1;>sp|P63258|ACTG_BOVIN Actin, cytoplasmic 2 OS=Bos taurus GN=ACTG1 PE=1 SV=1	2	21	21	2	73.1	41.792	0	43980000000	37396000000	47762000000	43046000000	44561000000	47624000000	73990000000	5.53917e+10	1.2868	0.277075
Q3SWW9;F1MW57;L8I582;W5QE45;W5QE44;O18931	>sp|Q3SWW9|PP1B_BOVIN Serine/threonine-protein phosphatase PP1-beta catalytic subunit OS=Bos taurus GN=PPP1CB PE=2 SV=1;>tr|F1MW57|F1MW57_BOVIN Serine/threonine-protein phosphatase OS=Bos taurus GN=PPP1CB PE=3 SV=2;>tr|L8I582|L8I582_9CETA Serine/threonine-	6	13	13	4	52	37.186	8.14e-159	166830000	217230000	166930000	1.83663e+08	347240000	254560000	160970000	2.54257e+08	1.38436	0.278386
P60661;L8I2Q9;W5PK27;B0FZM4;A1XEA6;A1XEA7	>sp|P60661|MYL6_BOVIN Myosin light polypeptide 6 OS=Bos taurus GN=MYL6 PE=2 SV=2;>tr|L8I2Q9|L8I2Q9_9CETA Myosin light polypeptide 6 (Fragment) OS=Bos mutus GN=M91_19728 PE=4 SV=1;>tr|W5PK27|W5PK27_SHEEP Uncharacterized protein OS=Ovis aries GN=MYL6 PE=4 SV	6	8	8	8	58.9	16.93	7.02e-63	877940000	674930000	448290000	6.67053e+08	900310000	688160000	984230000	8.57567e+08	1.2856	0.278831
L8IID8;A6QQ22;L8ILR7;W5P677;F6PZ29;Q3MHJ4	>tr|L8IID8|L8IID8_9CETA Uncharacterized protein OS=Bos mutus GN=M91_19038 PE=4 SV=1;>tr|A6QQ22|A6QQ22_BOVIN MCFD2 protein (Fragment) OS=Bos taurus GN=MCFD2 PE=2 SV=1;>tr|L8ILR7|L8ILR7_9CETA Multiple coagulation factor deficiency protein 2-like protein (Fra	6	3	3	3	21.9	21.653	9.75e-20	14488000		8149700	11318850	15237000	17142000		16189500	1.43031	0.278915
Q2KJ39;L8I089;W5PUL9;W5NVF2	>sp|Q2KJ39|RCN3_BOVIN Reticulocalbin-3 OS=Bos taurus GN=RCN3 PE=2 SV=1;>tr|L8I089|L8I089_9CETA Uncharacterized protein OS=Bos mutus GN=M91_17546 PE=4 SV=1;>tr|W5PUL9|W5PUL9_SHEEP Uncharacterized protein OS=Ovis aries GN=RCN3 PE=4 SV=1;>tr|W5NVF2|W5NVF2_SHE	4	9	9	9	38.7	37.568	1.58e-181	594270000	641880000	544640000	5.93597e+08	287760000	439930000	647660000	458450000	0.772326	0.279061
E1B7G3;M5FHM4;A7LCW9;Q32LG7;F1MUH4;L8J5L2;W5PVD0	>tr|E1B7G3|E1B7G3_BOVIN Uncharacterized protein OS=Bos taurus GN=STUB1 PE=4 SV=2;>tr|M5FHM4|M5FHM4_BOVIN STIP1 homology and U-box containing protein 1 OS=Bos taurus GN=STUB1 PE=4 SV=1;>tr|A7LCW9|A7LCW9_BOVIN STIP1 homology and U-box containing protein 1 OS	7	6	6	6	20.7	36.61	1.07e-13	22547000	26694000	53221000	34154000	26958000	20889000	17032000	2.16263e+07	0.633201	0.279898
Q2TBG8;W5Q2D0;W5Q922;L8IW61;W5Q2D1	>sp|Q2TBG8|UCHL3_BOVIN Ubiquitin carboxyl-terminal hydrolase isozyme L3 OS=Bos taurus GN=UCHL3 PE=2 SV=1;>tr|W5Q2D0|W5Q2D0_SHEEP Ubiquitin carboxyl-terminal hydrolase OS=Ovis aries GN=UCHL3 PE=3 SV=1;>tr|W5Q922|W5Q922_SHEEP Ubiquitin carboxyl-terminal hydr	5	2	2	2	12.6	26.181	4.9e-05	13393000	50466000		31929500	4296100	5164200		4730150	0.148144	0.280074
Q76I81;W5PYQ7;L8J0N7;Q30B80;W5NR25;E1BCB7;L8J1E0	>sp|Q76I81|RS12_BOVIN 40S ribosomal protein S12 OS=Bos taurus GN=RPS12 PE=2 SV=1;>tr|W5PYQ7|W5PYQ7_SHEEP 40S ribosomal protein S12 OS=Ovis aries GN=RPS12 PE=3 SV=1;>tr|L8J0N7|L8J0N7_9CETA 40S ribosomal protein S12 (Fragment) OS=Bos mutus GN=M91_20930 PE=3	7	6	6	6	62.1	14.515	0	193020000	155890000	77836000	1.42249e+08	470730000	254910000	111790000	2.79143e+08	1.96236	0.280154
F1N7T2;V9XY47;W5QC34	>tr|F1N7T2|F1N7T2_BOVIN Alpha-mannosidase OS=Bos taurus GN=MAN2A1 PE=3 SV=2;>tr|V9XY47|V9XY47_CAPHI Alpha-mannosidase OS=Capra hircus PE=2 SV=1;>tr|W5QC34|W5QC34_SHEEP Alpha-mannosidase OS=Ovis aries GN=MAN2A1 PE=3 SV=1	3	6	6	6	5.7	130.59	1.04e-15	36924000	52569000	105440000	6.49777e+07	16898000	38312000	52849000	3.60197e+07	0.554339	0.280218
F1N1I6;L8IZV3;F1MJH1;Q3SX14;F2YQ13;W5P627;K7WAN6	>tr|F1N1I6|F1N1I6_BOVIN Gelsolin OS=Bos taurus GN=GSN PE=1 SV=1;>tr|L8IZV3|L8IZV3_9CETA Gelsolin (Fragment) OS=Bos mutus GN=M91_04258 PE=4 SV=1;>tr|F1MJH1|F1MJH1_BOVIN Gelsolin OS=Bos taurus GN=GSN PE=1 SV=1;>sp|Q3SX14|GELS_BOVIN Gelsolin OS=Bos taurus GN=	7	19	19	19	32.9	85.686	0	574240000	934250000	471540000	660010000	596900000	379260000	423730000	466630000	0.707004	0.280766
P67808;W5QGW4;F1MZ92;A4UTS9;A5D7M4;W5PPL7;L8IX49;V9GZA0	>sp|P67808|YBOX1_BOVIN Nuclease-sensitive element-binding protein 1 OS=Bos taurus GN=YBX1 PE=2 SV=3;>tr|W5QGW4|W5QGW4_SHEEP Uncharacterized protein OS=Ovis aries GN=YBX1 PE=4 SV=1;>tr|F1MZ92|F1MZ92_BOVIN Nuclease-sensitive element-binding protein 1 OS=Bos	8	12	12	9	67	35.924	0	387530000	370700000	201770000	320000000	697720000	416820000	321850000	4.78797e+08	1.49624	0.280877
W5QF69;A0A0R5Z2J8;L8I212;Q58D84	>tr|W5QF69|W5QF69_SHEEP Uncharacterized protein OS=Ovis aries GN=FSTL1 PE=4 SV=1;>tr|A0A0R5Z2J8|A0A0R5Z2J8_SHEEP Follistatin-like protein 1 OS=Ovis aries GN=FSTL1 PE=2 SV=1;>tr|L8I212|L8I212_9CETA Follistatin-related protein 1 (Fragment) OS=Bos mutus GN=M9	4	7	7	7	27.3	35.035	2.29e-70	16684000	58278000	39480000	3.81473e+07	27892000	21176000	19469000	2.28457e+07	0.59888	0.281318
L8I4H1;W5PF85;Q0VCY8	>tr|L8I4H1|L8I4H1_9CETA Astrocytic phosphoprotein PEA-15 (Fragment) OS=Bos mutus GN=M91_19773 PE=4 SV=1;>tr|W5PF85|W5PF85_SHEEP Uncharacterized protein OS=Ovis aries GN=PEA15 PE=4 SV=1;>tr|Q0VCY8|Q0VCY8_BOVIN Phosphoprotein enriched in astrocytes 15 OS=Bos	3	2	2	2	18	15.337	2.69e-10	14554000	22052000	35752000	2.41193e+07		57966000	27044000	42505000	1.76228	0.281492
W5P3H8;Q8SQ25	>tr|W5P3H8|W5P3H8_SHEEP Uncharacterized protein OS=Ovis aries GN=IGF2R PE=4 SV=1;>tr|Q8SQ25|Q8SQ25_SHEEP Mannose-6-phosphate/insulin-like growth factor II receptor (Fragment) OS=Ovis aries GN=m6p/igf2r PE=2 SV=1	2	22	3	3	10.5	271.69	2.65e-67	12064000	35677000	42296000	3.00123e+07	19627000	19658000	16276000	1.85203e+07	0.617091	0.281676
W5QFI4	>tr|W5QFI4|W5QFI4_SHEEP Amino acid transporter OS=Ovis aries GN=SLC1A4 PE=3 SV=1	1	8	8	1	16.5	52.687	4.43e-75	236440000	218580000	306720000	2.53913e+08	153040000	265670000	182110000	2.00273e+08	0.788747	0.281871
L8ICZ3;P12344;W5NUG0;Q862R2;Q9N102;Q862Q8	>tr|L8ICZ3|L8ICZ3_9CETA Aspartate aminotransferase OS=Bos mutus GN=M91_00081 PE=4 SV=1;>sp|P12344|AATM_BOVIN Aspartate aminotransferase, mitochondrial OS=Bos taurus GN=GOT2 PE=1 SV=2;>tr|W5NUG0|W5NUG0_SHEEP Aspartate aminotransferase OS=Ovis aries GN=GOT2	6	10	10	10	24.7	47.504	5.31e-25	74420000	69392000	105690000	8.31673e+07	81820000	104120000	160070000	1.15337e+08	1.3868	0.282008
L8J0F0;W5PAH6;A0JN39	>tr|L8J0F0|L8J0F0_9CETA Coatomer subunit beta OS=Bos mutus GN=M91_20658 PE=4 SV=1;>tr|W5PAH6|W5PAH6_SHEEP Coatomer subunit beta OS=Ovis aries GN=COPB1 PE=4 SV=1;>sp|A0JN39|COPB_BOVIN Coatomer subunit beta OS=Bos taurus GN=COPB1 PE=1 SV=1	3	18	18	18	23.1	107.14	3.84e-80	154070000	206080000	149720000	1.69957e+08	176050000	127720000	97401000	1.33724e+08	0.78681	0.282376
Q5E994;L8IAE1;W5PM25	>sp|Q5E994|CHM1B_BOVIN Charged multivesicular body protein 1b OS=Bos taurus GN=CHMP1B PE=2 SV=1;>tr|L8IAE1|L8IAE1_9CETA Charged multivesicular body protein 1b OS=Bos mutus GN=M91_03379 PE=4 SV=1;>tr|W5PM25|W5PM25_SHEEP Uncharacterized protein OS=Ovis aries	3	3	3	3	12.6	22.022	7.49e-06	19384000	21885000	18084000	1.97843e+07	18874000	25556000	23301000	22577000	1.14116	0.283707
C7BDX2;Q5E9C0;W5PH15;L8HZW4	>tr|C7BDX2|C7BDX2_SHEEP Ras suppressor protein 1 OS=Ovis aries GN=RSU1 PE=2 SV=1;>sp|Q5E9C0|RSU1_BOVIN Ras suppressor protein 1 OS=Bos taurus GN=RSU1 PE=2 SV=1;>tr|W5PH15|W5PH15_SHEEP Uncharacterized protein OS=Ovis aries GN=RSU1 PE=4 SV=1;>tr|L8HZW4|L8HZW	4	9	9	9	40.8	31.551	1.18e-28	44203000	58105000	34117000	45475000	114440000	56868000	47168000	7.28253e+07	1.60144	0.283865
I1X3V1;Q6J275;L8INT7;W5PWZ2;A0A166ZJ27;Q862F2	>tr|I1X3V1|I1X3V1_CAPHI Galectin OS=Capra hircus GN=GAL1 PE=2 SV=1;>tr|Q6J275|Q6J275_SHEEP Galectin OS=Ovis aries PE=2 SV=1;>tr|L8INT7|L8INT7_9CETA Galectin (Fragment) OS=Bos mutus GN=M91_14178 PE=4 SV=1;>tr|W5PWZ2|W5PWZ2_SHEEP Galectin OS=Ovis aries GN=LG	6	8	8	2	58.1	14.818	1.32e-276	1288400000	1356800000	687470000	1110890000	2962200000	1856300000	878160000	1.89889e+09	1.70934	0.284661
A0A140T897;P02769;L8ISP4;Q3I349	>tr|A0A140T897|A0A140T897_BOVIN Serum albumin OS=Bos taurus GN=ALB PE=3 SV=1;>sp|P02769|ALBU_BOVIN Serum albumin OS=Bos taurus GN=ALB PE=1 SV=4;>tr|L8ISP4|L8ISP4_9CETA Serum albumin OS=Bos mutus GN=M91_08159 PE=3 SV=1;>tr|Q3I349|Q3I349_BOSIN Serum albumin	4	37	37	2	66.4	69.323	3.29e-202	1747500000	1854900000	831880000	1.47809e+09	1284400000	877010000	990590000	1.05067e+09	0.710826	0.28495
Q3T0W9;W5PLN0;L8IGX9;Q8HXS2;F1N2W8;W5NQQ2	>sp|Q3T0W9|RL19_BOVIN 60S ribosomal protein L19 OS=Bos taurus GN=RPL19 PE=2 SV=1;>tr|W5PLN0|W5PLN0_SHEEP Ribosomal protein L19 OS=Ovis aries GN=RPL19 PE=3 SV=1;>tr|L8IGX9|L8IGX9_9CETA Ribosomal protein L19 (Fragment) OS=Bos mutus GN=M91_05268 PE=3 SV=1;>tr	6	7	7	7	31.1	23.466	3.99e-32	267210000	309200000	139670000	2.38693e+08	572650000	462800000	166950000	400800000	1.67914	0.284966
W5PRF0;A7YWC6;L8IDM0	>tr|W5PRF0|W5PRF0_SHEEP Uncharacterized protein OS=Ovis aries GN=SUB1 PE=4 SV=1;>tr|A7YWC6|A7YWC6_BOVIN SUB1 protein OS=Bos taurus GN=SUB1 PE=1 SV=1;>tr|L8IDM0|L8IDM0_9CETA Activated RNA polymerase II transcriptional coactivator p15 (Fragment) OS=Bos mutus	3	4	4	4	37	14.395	4.45e-17	46805000	56630000	19127000	40854000	251660000	102580000	21026000	1.25089e+08	3.06185	0.285889
W5PC06;G3X6M9;O46631;W5PCM7;A6QPC6;L8I0Q9;Q58DE8;L8I466;F1MRG6;F1MD75;L8I1U8;A0A0U3AD00;A0A0U3J8P1;A0A0U3JA45	>tr|W5PC06|W5PC06_SHEEP Uncharacterized protein OS=Ovis aries GN=SIRPA PE=4 SV=1;>tr|G3X6M9|G3X6M9_BOVIN Tyrosine-protein phosphatase non-receptor type substrate 1 OS=Bos taurus GN=SIRPA PE=4 SV=1;>sp|O46631|SHPS1_BOVIN Tyrosine-protein phosphatase non-rec	14	5	5	5	18	54.758	9.23e-111	14920000	35453000	19332000	23235000	120930000	53220000	13548000	62566000	2.69275	0.285929
J7GY82;L8IIF6;Q8SQB8;W6A0N4;B0FYY3;Q863C4	>tr|J7GY82|J7GY82_CAPHI Integrin beta OS=Capra hircus PE=2 SV=1;>tr|L8IIF6|L8IIF6_9CETA Integrin beta OS=Bos mutus GN=M91_05748 PE=3 SV=1;>sp|Q8SQB8|ITB6_BOVIN Integrin beta-6 OS=Bos taurus GN=ITGB6 PE=1 SV=1;>tr|W6A0N4|W6A0N4_BOSIN Integrin beta OS=Bos in	6	1	1	1	1.1	85.875	0.0021948	396710000	314700000	361570000	357660000	358450000	318120000	196580000	291050000	0.813762	0.28597
F1N647;Q71SP7;L7S7L6;A0A0A7RE76;A0A0S2ILS3;Q5UAX2;H9A9G4	>tr|F1N647|F1N647_BOVIN Fatty acid synthase OS=Bos taurus GN=FASN PE=1 SV=2;>sp|Q71SP7|FAS_BOVIN Fatty acid synthase OS=Bos taurus GN=FASN PE=2 SV=1	7	12	1	1	7.1	274.26	2.01e-199	13537000	48633000		31085000	54587000	58360000		56473500	1.81674	0.286896
L8IT20;Q3MHM7;W5PUU6;L8IAZ3;W5NSU9	>tr|L8IT20|L8IT20_9CETA Uncharacterized protein (Fragment) OS=Bos mutus GN=M91_20630 PE=3 SV=1;>sp|Q3MHM7|RL35_BOVIN 60S ribosomal protein L35 OS=Bos taurus GN=RPL35 PE=2 SV=3;>tr|W5PUU6|W5PUU6_SHEEP Uncharacterized protein OS=Ovis aries PE=3 SV=1;>tr|L8IA	5	2	2	2	15.4	14.449	1.49e-05	104510000	128980000	49798000	9.44293e+07	175080000	228620000	70760000	1.58153e+08	1.67483	0.287021
F1N5P6;L8I6J8;W5PR17;Q27IK9	>tr|F1N5P6|F1N5P6_BOVIN Uncharacterized protein OS=Bos taurus GN=SLC7A1 PE=4 SV=1;>tr|L8I6J8|L8I6J8_9CETA High affinity cationic amino acid transporter 1 OS=Bos mutus GN=M91_03501 PE=4 SV=1;>tr|W5PR17|W5PR17_SHEEP Uncharacterized protein OS=Ovis aries GN=S	4	6	6	5	13	67.891	1.39e-79	108980000	106000000	251940000	155640000	53244000	142870000	66227000	87447000	0.561854	0.287927
P23935	>sp|P23935|NDUA5_BOVIN NADH dehydrogenase [ubiquinone] 1 alpha subcomplex subunit 5 OS=Bos taurus GN=NDUFA5 PE=1 SV=3	1	1	1	1	18.1	13.315	3.12e-17	13211000		38064000	25637500		7366000	8318300	7842150	0.305886	0.288734
W5PD32;P80513;L8HJM9	>tr|W5PD32|W5PD32_SHEEP Uncharacterized protein OS=Ovis aries GN=MANF PE=4 SV=1;>sp|P80513|MANF_BOVIN Mesencephalic astrocyte-derived neurotrophic factor OS=Bos taurus GN=MANF PE=1 SV=2;>tr|L8HJM9|L8HJM9_9CETA Mesencephalic astrocyte-derived neurotrophic f	3	3	3	3	15.1	20.995	2.26e-06	21226000	36288000	23542000	2.70187e+07	15896000	21651000		18773500	0.694834	0.288893
W5PB89;L8HTE7;Q5E9F1	>tr|W5PB89|W5PB89_SHEEP Uncharacterized protein OS=Ovis aries GN=BCAP31 PE=4 SV=1;>tr|L8HTE7|L8HTE7_9CETA B-cell receptor-associated protein 31 (Fragment) OS=Bos mutus GN=M91_08723 PE=4 SV=1;>tr|Q5E9F1|Q5E9F1_BOVIN B-cell receptor-associated protein 31 OS=	3	8	8	8	30.6	30.177	9.03e-33	252980000	259200000	220500000	2.44227e+08	143610000	225550000	243090000	2.04083e+08	0.835631	0.289695
W5QH03;E1BMD6;L8IBL4	>tr|W5QH03|W5QH03_SHEEP Uncharacterized protein OS=Ovis aries GN=LPP PE=4 SV=1;>tr|E1BMD6|E1BMD6_BOVIN Uncharacterized protein OS=Bos taurus GN=LPP PE=1 SV=1;>tr|L8IBL4|L8IBL4_9CETA Lipoma-preferred partner (Fragment) OS=Bos mutus GN=M91_10571 PE=4 SV=1	3	9	8	8	22	65.673	1.88e-36	30252000	23617000	24889000	2.62527e+07	40732000	27599000	27862000	3.20643e+07	1.22137	0.291558
L8J197;W5PFY3;Q17QB3;W5PFY5	>tr|L8J197|L8J197_9CETA Acid ceramidase (Fragment) OS=Bos mutus GN=M91_08388 PE=4 SV=1;>tr|W5PFY3|W5PFY3_SHEEP Uncharacterized protein OS=Ovis aries GN=ASAH1 PE=4 SV=1;>sp|Q17QB3|ASAH1_BOVIN Acid ceramidase OS=Bos taurus GN=ASAH1 PE=2 SV=3;>tr|W5PFY5|W5PFY	4	5	5	5	10	47.583	2.12e-11	34024000	16641000	66788000	39151000	49487000	48952000	108890000	6.91097e+07	1.76521	0.292471
P35605;W5PAX6;L8I471;G8JKX8;W5NUL1;Q862H2	>sp|P35605|COPB2_BOVIN Coatomer subunit beta OS=Bos taurus GN=COPB2 PE=1 SV=3;>tr|W5PAX6|W5PAX6_SHEEP Coatomer subunit beta OS=Ovis aries GN=COPB2 PE=3 SV=1;>tr|L8I471|L8I471_9CETA Coatomer subunit beta (Fragment) OS=Bos mutus GN=M91_08399 PE=4 SV=1;>tr|	6	22	22	22	34.3	102.39	3.05e-119	133300000	212150000	98077000	1.47842e+08	146380000	89945000	45405000	93910000	0.635204	0.29333
A0A0B5CTM8;F1MRS8	>tr|A0A0B5CTM8|A0A0B5CTM8_9CETA Fatty acid binding protein 9 OS=Bos mutus GN=fabp9 PE=2 SV=1;>tr|F1MRS8|F1MRS8_BOVIN Uncharacterized protein OS=Bos taurus GN=FABP9 PE=3 SV=2	2	1	1	1	7.6	14.889	0.017678	12603000	14207000		13405000		15940000	14202000	15071000	1.12428	0.294238
L8J1P5;P62871;W5NUV1;A7E3V7;W5NUU9;I7AL46;W5P6U1;E1BB14;L8HU84;I7A156	>tr|L8J1P5|L8J1P5_9CETA Guanine nucleotide-binding protein G(I)/G(S)/G(T) subunit beta-1 OS=Bos mutus GN=M91_10908 PE=4 SV=1;>sp|P62871|GBB1_BOVIN Guanine nucleotide-binding protein G(I)/G(S)/G(T) subunit beta-1 OS=Bos taurus GN=GNB1 PE=1 SV=3;>tr|W5NUV1|W	10	13	13	7	50.6	37.377	0	3657100000	2480700000	2967100000	3.03497e+09	1912300000	2597800000	2943500000	2.48453e+09	0.818636	0.294259
Q2Q1M7	>tr|Q2Q1M7|Q2Q1M7_CEREL Tropomyosin 1 alpha OS=Cervus elaphus GN=TMP1 PE=2 SV=1	1	19	3	0	54.2	32.863	1.3e-203	156750000	136070000	15508000	102776000	45618000		12599000	29108500	0.283223	0.294775
W5PP33;Q1RMV1;E1BG97	>tr|W5PP33|W5PP33_SHEEP Uncharacterized protein OS=Ovis aries GN=ENG PE=4 SV=1;>tr|Q1RMV1|Q1RMV1_BOVIN Endoglin OS=Bos taurus GN=ENG PE=2 SV=1;>tr|E1BG97|E1BG97_BOVIN Uncharacterized protein OS=Bos taurus PE=4 SV=2	3	2	2	2	3.9	70.2	8.17e-07	46372000	25751000	54688000	4.22703e+07	29803000	22332000	39108000	3.04143e+07	0.71952	0.296174
E1BN60;L8J064	>tr|E1BN60|E1BN60_BOVIN Uncharacterized protein OS=Bos taurus GN=SLC30A1 PE=4 SV=1;>tr|L8J064|L8J064_9CETA Zinc transporter 1 OS=Bos mutus GN=M91_19078 PE=4 SV=1	2	6	6	1	16.8	55.378	9.5e-34	37101000	55853000	31147000	41367000	43118000	27203000	10976000	27099000	0.655087	0.296555
A6H767;L8HT38;W5PZN3;W5QFF1;W5QDK1;L8IZ80;W5QCK7;W5PHU0;G3X7M5;W5NRE2;L8IGW8;L8HPH3	>sp|A6H767|NP1L1_BOVIN Nucleosome assembly protein 1-like 1 OS=Bos taurus GN=NAP1L1 PE=2 SV=1;>tr|L8HT38|L8HT38_9CETA Nucleosome assembly protein 1-like 1 (Fragment) OS=Bos mutus GN=M91_02782 PE=3 SV=1;>tr|W5PZN3|W5PZN3_SHEEP Uncharacterized protein OS=Ovi	12	7	7	6	26.6	45.376	5.78e-56	139410000	181120000	113380000	1.44637e+08	170890000	68125000	19523000	8.61793e+07	0.595833	0.296961
Q9XSA7;W5P8X9;L8HQU4	>sp|Q9XSA7|CLIC4_BOVIN Chloride intracellular channel protein 4 OS=Bos taurus GN=CLIC4 PE=2 SV=3;>tr|W5P8X9|W5P8X9_SHEEP Chloride intracellular channel protein OS=Ovis aries GN=CLIC4 PE=3 SV=1;>tr|L8HQU4|L8HQU4_9CETA Chloride intracellular channel protein	3	12	12	11	67.6	28.727	1.29e-58	94166000	216700000	126010000	1.45625e+08	458550000	271900000	100640000	277030000	1.90235	0.297009
W5PVX4;A6H7G2	>tr|W5PVX4|W5PVX4_SHEEP Uncharacterized protein OS=Ovis aries GN=DBNL PE=4 SV=1;>sp|A6H7G2|DBNL_BOVIN Drebrin-like protein OS=Bos taurus GN=DBNL PE=2 SV=1	2	6	6	3	17.5	49.64	1.32e-13	8707000	10204000		9455500	9970600	10064000	11332000	1.04555e+07	1.10576	0.297591
L8IBE2;Q32PG1;W5Q6N9;E1BME2;L8J1S8;W5PW49	>tr|L8IBE2|L8IBE2_9CETA AP-3 complex subunit beta OS=Bos mutus GN=M91_15988 PE=3 SV=1;>sp|Q32PG1|AP3B1_BOVIN AP-3 complex subunit beta-1 OS=Bos taurus GN=AP3B1 PE=2 SV=1;>tr|W5Q6N9|W5Q6N9_SHEEP AP-3 complex subunit beta OS=Ovis aries GN=AP3B1 PE=3 SV=1	6	3	3	3	2.8	120.12	2.44e-08	6229300	15898000	11701000	11276100	24979000	12419000		18699000	1.65829	0.298266
W5NY99	>tr|W5NY99|W5NY99_SHEEP Uncharacterized protein OS=Ovis aries GN=FSCN1 PE=4 SV=1	1	14	1	1	30	57.794	9.74e-135	30838000	79755000	17946000	4.28463e+07	163290000	92052000	28303000	9.45483e+07	2.20668	0.298379
F1N0Z6;Q32LQ1;L8IQ33	>tr|F1N0Z6|F1N0Z6_BOVIN Pleckstrin homology domain-containing family O member 2 OS=Bos taurus GN=PLEKHO2 PE=4 SV=2;>sp|Q32LQ1|PKHO2_BOVIN Pleckstrin homology domain-containing family O member 2 OS=Bos taurus GN=PLEKHO2 PE=2 SV=1;>tr|L8IQ33|L8IQ33_9CETA Ple	3	6	6	2	16.6	54.116	2.29e-19	11698000	16236000		13967000	47363000	30320000	12919000	3.02007e+07	2.16229	0.298728
Q2NKT5;L8IIW6;W5QGC4	>tr|Q2NKT5|Q2NKT5_BOVIN Sec61 beta subunit OS=Bos taurus GN=SEC61B PE=1 SV=1;>tr|L8IIW6|L8IIW6_9CETA Protein transport protein Sec61 subunit beta (Fragment) OS=Bos mutus GN=M91_20268 PE=4 SV=1	3	3	3	3	37.5	9.9443	7.06e-11	154120000	155540000	197010000	168890000	62551000	191760000	107970000	1.2076e+08	0.715024	0.299104
L8HN18;W5PSV2	>tr|L8HN18|L8HN18_9CETA Thyroid receptor-interacting protein 11 OS=Bos mutus GN=M91_17675 PE=4 SV=1;>tr|W5PSV2|W5PSV2_SHEEP Uncharacterized protein OS=Ovis aries GN=TRIP11 PE=4 SV=1	2	2	2	2	1.1	227.12	0.00021681	13039000	18327000	38340000	2.32353e+07	7560700	13422000		10491350	0.451526	0.299502
G3X7W8	>tr|G3X7W8|G3X7W8_BOVIN Uncharacterized protein OS=Bos taurus GN=KRT16 PE=3 SV=1	1	7	1	0	16.1	39.73	1.09e-24	10640000	6280100	11028000	9.31603e+06		8388600	41563000	24975800	2.68095	0.299636
W5PHY6;L8IA51;Q17QC7	>tr|W5PHY6|W5PHY6_SHEEP Uncharacterized protein OS=Ovis aries GN=NECTIN2 PE=4 SV=1;>tr|L8IA51|L8IA51_9CETA Poliovirus receptor-related protein 2 (Fragment) OS=Bos mutus GN=M91_05705 PE=4 SV=1;>tr|Q17QC7|Q17QC7_BOVIN Poliovirus receptor-related 2 (Herpesvir	3	6	6	6	14.1	56.5	8.17e-32	41059000	54760000	63668000	5.31623e+07	43817000	53223000	21975000	3.96717e+07	0.746236	0.300466
W5PJN0;L8J1Q1;B2LU26;Q2KHU0	>tr|W5PJN0|W5PJN0_SHEEP Uncharacterized protein OS=Ovis aries GN=PSPH PE=4 SV=1;>tr|L8J1Q1|L8J1Q1_9CETA Phosphoserine phosphatase (Fragment) OS=Bos mutus GN=M91_19495 PE=4 SV=1;>tr|B2LU26|B2LU26_SHEEP PSPH OS=Ovis aries PE=2 SV=1;>sp|Q2KHU0|SERB_BOVIN Phos	4	4	4	4	19	25.634	3.15e-10	15481000	20934000		18207500	10642000	15588000		13115000	0.720308	0.300706
G1DFT2;P79103;W5PFW3;G3N0K3;L8I2B8;W5Q8J9;L8I954;F1MJH2;W5PHJ8;L8J0Q5;W5P2C4;L8IYU0;L8HQA0;G3N267;W5PMB5;E1BGR7;L8I1B2;L8HS12;W5PXB5;L8IHS9;Q2XW10;F4YD25;F1MZI5;W5PYM1;L8IIH4;L8IM83	>tr|G1DFT2|G1DFT2_CAPHI 40S ribosomal protein S4 OS=Capra hircus GN=RPS4X PE=2 SV=1;>sp|P79103|RS4_BOVIN 40S ribosomal protein S4 OS=Bos taurus GN=RPS4 PE=2 SV=3;>tr|W5PFW3|W5PFW3_SHEEP 40S ribosomal protein S4 OS=Ovis aries GN=LOC101107216 PE=3 SV=1;>tr|G	26	13	1	1	51	29.661	1.52e-81	60303000	52658000	33676000	48879000	79965000	92382000	38451000	70266000	1.43755	0.303415
F1MWR3;L8IUV2;Q2KJE4;W5NTP6;W5PKE2	>tr|F1MWR3|F1MWR3_BOVIN Electron transfer flavoprotein subunit alpha, mitochondrial OS=Bos taurus GN=ETFA PE=1 SV=1;>tr|L8IUV2|L8IUV2_9CETA Electron transfer flavoprotein subunit alpha, mitochondrial (Fragment) OS=Bos mutus GN=M91_16795 PE=4 SV=1;>sp|Q2KJE	5	2	2	2	11.7	34.957	3.15e-19	16697000		10018000	13357500		8220600	9228500	8724550	0.653157	0.303742
L8HXA2;W5Q3F7;Q0VCW2	>tr|L8HXA2|L8HXA2_9CETA Abl interactor 1 OS=Bos mutus GN=M91_07115 PE=4 SV=1;>tr|W5Q3F7|W5Q3F7_SHEEP Uncharacterized protein OS=Ovis aries GN=ABI1 PE=4 SV=1;>tr|Q0VCW2|Q0VCW2_BOVIN Abl-interactor 1 OS=Bos taurus GN=ABI1 PE=1 SV=1	3	6	6	6	13.9	54.623	1.36e-14	25989000	25255000	15469000	2.22377e+07	34122000	24408000		29265000	1.31601	0.304072
W5PUG6;A0A0C5Q4X5;P50122;A0A1L3G6H3;P20414;G0TBE5;Q9MZ12	>tr|W5PUG6|W5PUG6_SHEEP Metalloproteinase inhibitor 1 OS=Ovis aries GN=TIMP1 PE=4 SV=1;>tr|A0A0C5Q4X5|A0A0C5Q4X5_CAPHI Metalloproteinase inhibitor 1 OS=Capra hircus GN=Timp1 PE=2 SV=1;>sp|P50122|TIMP1_SHEEP Metalloproteinase inhibitor 1 OS=Ovis aries GN=TI	7	3	3	3	13.3	28.633	2.93e-33	23273000	51471000	26080000	33608000	14977000		22736000	18856500	0.561072	0.304368
A7YWQ4;W5P013;L8IKY4	>tr|A7YWQ4|A7YWQ4_BOVIN SNTB2 protein OS=Bos taurus GN=SNTB2 PE=2 SV=1;>tr|W5P013|W5P013_SHEEP Uncharacterized protein OS=Ovis aries GN=SNTB2 PE=4 SV=1;>tr|L8IKY4|L8IKY4_9CETA Beta-2-syntrophin (Fragment) OS=Bos mutus GN=M91_18228 PE=4 SV=1	3	9	9	9	18.7	57.956	8.56e-27	15019000		11788000	13403500	29460000	19577000	13665000	2.09007e+07	1.55934	0.304619
P13135;W5P5G5;L8HVB4;Q1PCR9;Q9MYZ0	>sp|P13135|CPNS1_BOVIN Calpain small subunit 1 OS=Bos taurus GN=CAPNS1 PE=2 SV=1;>tr|W5P5G5|W5P5G5_SHEEP Uncharacterized protein OS=Ovis aries GN=CAPNS1 PE=4 SV=1;>tr|L8HVB4|L8HVB4_9CETA Calpain small subunit 1 OS=Bos mutus GN=M91_17414 PE=4 SV=1;>tr|Q1PCR	5	6	6	6	29.3	27.931	9.53e-99	74633000	59617000	36554000	5.69347e+07	53052000	38257000	36404000	42571000	0.747717	0.30649
L8IWZ4;Q3MHW4;W5QIQ6;Q58DU3;F1MKF8	>tr|L8IWZ4|L8IWZ4_9CETA Sulfide:quinone oxidoreductase, mitochondrial OS=Bos mutus GN=M91_07883 PE=4 SV=1;>tr|Q3MHW4|Q3MHW4_BOVIN SQRDL protein OS=Bos taurus GN=SQRDL PE=2 SV=1;>tr|W5QIQ6|W5QIQ6_SHEEP Uncharacterized protein OS=Ovis aries GN=SQRDL PE=4 SV=	5	4	4	4	13.3	49.871	7.56e-70	35584000		52575000	44079500		53035000	60236000	56635500	1.28485	0.306634
W5PDE3;L8J599;Q3MHG1	>tr|W5PDE3|W5PDE3_SHEEP Uncharacterized protein OS=Ovis aries GN=SPTLC1 PE=4 SV=1;>tr|L8J599|L8J599_9CETA Serine palmitoyltransferase 1 OS=Bos mutus GN=M91_17167 PE=4 SV=1;>sp|Q3MHG1|SPTC1_BOVIN Serine palmitoyltransferase 1 OS=Bos taurus GN=SPTLC1 PE=2 SV	3	11	11	11	28.6	53.071	1.56e-29	89149000	63977000	88625000	8.05837e+07	38122000	66392000	82876000	6.24633e+07	0.775136	0.306847
W5NRL8;L8I457;B0LRN9	>tr|W5NRL8|W5NRL8_SHEEP Eukaryotic translation initiation factor 3 subunit A OS=Ovis aries GN=EIF3A PE=3 SV=1;>tr|L8I457|L8I457_9CETA Eukaryotic translation initiation factor 3 subunit A (Fragment) OS=Bos mutus GN=M91_10463 PE=3 SV=1	3	34	34	1	26.4	164.95	2.71e-207	147620000	177210000	72341000	1.3239e+08	729990000	361990000	26372000	372784000	2.81579	0.307177
W5Q8J3	>tr|W5Q8J3|W5Q8J3_SHEEP Uncharacterized protein OS=Ovis aries PE=4 SV=1	1	24	4	4	19	164.51	1.35e-203	48681000	112060000	54726000	7.18223e+07	39715000	50920000	52627000	47754000	0.664891	0.307471
W5QDQ7;L8IM29;C8BKE2;F1N1E3;Q9GLE4;W5QDQ8;Q0V8K1;Q9XSP0;Q9BGL3;Q9XSI7;F1MHG1;L8IB19;F1MTK6;L8IBU5;W5PQZ9	>tr|W5QDQ7|W5QDQ7_SHEEP Uncharacterized protein OS=Ovis aries GN=MMP14 PE=3 SV=1;>tr|L8IM29|L8IM29_9CETA Matrix metalloproteinase-14 (Fragment) OS=Bos mutus GN=M91_15388 PE=3 SV=1;>tr|C8BKE2|C8BKE2_SHEEP Membrane-inserted matrix metallopeptidase 14 OS=Ovis	15	13	13	13	25.6	62.398	1.16e-214	318640000	609720000	410980000	4.46447e+08	387870000	377800000	213100000	3.26257e+08	0.730785	0.307592
L8IS44;F1N582;W5PBQ8	>tr|L8IS44|L8IS44_9CETA Protein odr-4-like protein OS=Bos mutus GN=M91_16524 PE=4 SV=1;>tr|F1N582|F1N582_BOVIN Uncharacterized protein OS=Bos taurus GN=C1orf27 PE=4 SV=1;>tr|W5PBQ8|W5PBQ8_SHEEP Uncharacterized protein OS=Ovis aries GN=C1orf27 PE=4 SV=1	3	5	5	5	14.3	51.264	3.66e-20	12306000	19068000	22340000	1.79047e+07	11500000		14569000	13034500	0.727995	0.308614
Q3ZC44;W5P8K5;L8I095	>tr|Q3ZC44|Q3ZC44_BOVIN Heterogeneous nuclear ribonucleoprotein A/B OS=Bos taurus GN=HNRNPAB PE=1 SV=1;>tr|W5P8K5|W5P8K5_SHEEP Uncharacterized protein OS=Ovis aries GN=HNRNPAB PE=4 SV=1;>tr|L8I095|L8I095_9CETA Heterogeneous nuclear ribonucleoprotein A/B (F	3	4	4	4	20	30.653	2.02e-14	48848000	17333000	13504000	2.65617e+07	66391000	58101000	19260000	4.79173e+07	1.804	0.30901
L8HTD3;E1BLC8;W5PFY7;L8I1I2;W5PFZ0;F1MIK1;G3N2H3;Q6EVI2;Q6EVI3	>tr|L8HTD3|L8HTD3_9CETA Eukaryotic translation initiation factor 4 gamma 1 OS=Bos mutus GN=M91_03607 PE=4 SV=1	9	26	26	0	19.6	176.52	8.58e-277	158020000	218800000	128600000	1.68473e+08	481500000	300840000	109410000	297250000	1.76437	0.309231
E1BCW3;L8I714;W5PWG1	>tr|E1BCW3|E1BCW3_BOVIN ATP-dependent 6-phosphofructokinase OS=Bos taurus GN=PFKP PE=3 SV=2;>tr|L8I714|L8I714_9CETA ATP-dependent 6-phosphofructokinase OS=Bos mutus GN=M91_01955 PE=3 SV=1	3	9	9	7	13.7	86.005	4.17e-41	14573000	25894000	19383000	19950000	38767000	16223000	30446000	2.84787e+07	1.4275	0.310666
B6VAP7;G1JRQ4;G3GK36;M4WED3;Q2KJ93;W5PE11;F1MND1;L8I2G1;F1N5L2;I3W7D9;W5QJ22;A4FV20;L8IDK3;L8I976;E1BLE9;W5P784	>tr|B6VAP7|B6VAP7_BOVIN CDC42 protein OS=Bos taurus GN=CDC42 PE=2 SV=1;>tr|G1JRQ4|G1JRQ4_BUBBU Cdc42 protein OS=Bubalus bubalis PE=2 SV=1;>tr|G3GK36|G3GK36_RUCEL CDC42 OS=Rucervus eldii PE=2 SV=1;>tr|M4WED3|M4WED3_SHEEP Cell division cycle 42 OS=Ovis aries	16	7	6	6	41.4	21.243	7.68e-102	511590000	310920000	103940000	3.08817e+08	181500000	167080000	168290000	172290000	0.557904	0.31085
F1MNI4;L8I100;W5PLV3	>tr|F1MNI4|F1MNI4_BOVIN Uncharacterized protein OS=Bos taurus GN=RAB5B PE=1 SV=1;>tr|L8I100|L8I100_9CETA Ras-related protein Rab-5B (Fragment) OS=Bos mutus GN=M91_07256 PE=4 SV=1;>tr|W5PLV3|W5PLV3_SHEEP Uncharacterized protein OS=Ovis aries GN=RAB5B PE=4 S	3	8	8	5	45	25.153	6.1e-72	238850000	220970000	182370000	2.14063e+08	211450000	239670000	363950000	271690000	1.2692	0.310926
D1MCA8;Q5E995;W5PXV8;L8I802;W5NXG4;F1MKZ5;W5QF03;L8HQ10;E1B8K9;E1BG13;W5P6S4;Q30B82;G1DFQ0;W5NV05;A5JSR8;F4YD26;A4IFU6;L8ID76	>tr|D1MCA8|D1MCA8_CAPHI 40S ribosomal protein S6 OS=Capra hircus GN=Rps6 PE=2 SV=1;>sp|Q5E995|RS6_BOVIN 40S ribosomal protein S6 OS=Bos taurus GN=RPS6 PE=2 SV=1;>tr|W5PXV8|W5PXV8_SHEEP 40S ribosomal protein S6 OS=Ovis aries GN=RPS6 PE=3 SV=1;>tr|L8I802|L8I	18	7	7	7	26.1	28.666	3.88e-32	379170000	425420000	238040000	3.47543e+08	645840000	675030000	242960000	5.21277e+08	1.49989	0.312263
L8IRC1;Q9XT96	>tr|L8IRC1|L8IRC1_9CETA Presenilin (Fragment) OS=Bos mutus GN=M91_03813 PE=3 SV=1;>sp|Q9XT96|PSN2_BOVIN Presenilin-2 OS=Bos taurus GN=PSEN2 PE=2 SV=2	2	2	1	1	4.8	51.373	9.26e-12	6269300		4680300	5474800		7315500	17681000	12498250	2.28287	0.312328
E1BDY3;W5P6V4;G3N2K4	>tr|E1BDY3|E1BDY3_BOVIN Uncharacterized protein OS=Bos taurus GN=GLG1 PE=1 SV=2;>tr|W5P6V4|W5P6V4_SHEEP Uncharacterized protein OS=Ovis aries GN=GLG1 PE=4 SV=1;>tr|G3N2K4|G3N2K4_BOVIN Uncharacterized protein OS=Bos taurus GN=GLG1 PE=1 SV=1	3	31	31	31	29.7	134.63	1.3e-204	313250000	423630000	990220000	575700000	213670000	323020000	431720000	3.22803e+08	0.560714	0.312353
G3MWQ7;W5NVK4;L8II95;Q3T134	>tr|G3MWQ7|G3MWQ7_BOVIN Uncharacterized protein OS=Bos taurus PE=4 SV=1;>tr|W5NVK4|W5NVK4_SHEEP Uncharacterized protein OS=Ovis aries GN=SPCS1 PE=4 SV=1;>tr|L8II95|L8II95_9CETA Signal peptidase complex subunit 1 OS=Bos mutus GN=M91_14530 PE=4 SV=1;>sp|Q3T1	4	2	2	2	16.5	18.143	7.61e-18	93960000	51743000	94661000	8.01213e+07	21754000	68540000	74402000	5.48987e+07	0.685194	0.313269
L8ITI0;W5Q519;Q3T148;F1N5F7	>tr|L8ITI0|L8ITI0_9CETA Eukaryotic translation initiation factor 3 subunit M OS=Bos mutus GN=EIF3M PE=3 SV=1;>tr|W5Q519|W5Q519_SHEEP Eukaryotic translation initiation factor 3 subunit M OS=Ovis aries GN=EIF3M PE=3 SV=1;>sp|Q3T148|EIF3M_BOVIN Eukaryotic tra	4	9	9	9	39	42.502	4.89e-199	13641000	14738000	19603000	15994000	136420000	9627000		73023500	4.56568	0.314459
Q0VCY7;W5PEQ9	>sp|Q0VCY7|SRSF1_BOVIN Serine/arginine-rich splicing factor 1 OS=Bos taurus GN=SRSF1 PE=2 SV=1;>tr|W5PEQ9|W5PEQ9_SHEEP Uncharacterized protein OS=Ovis aries GN=SRSF1 PE=4 SV=1	2	9	9	9	39.9	27.744	2.72e-33	78337000	57921000	30670000	5.56427e+07	129860000	84628000	47400000	87296000	1.56887	0.314627
L8ITN1;F1MI60;W5PUK2;L8HZ79;W5QHW5;E1BIS8;W5QHW4;W5PVL0;A0A024FBV6;E1BKH8;L8IWG7;G3MYP3	>tr|L8ITN1|L8ITN1_9CETA Mitogen-activated protein kinase kinase kinase kinase 4 (Fragment) OS=Bos mutus GN=M91_02881 PE=4 SV=1;>tr|F1MI60|F1MI60_BOVIN Uncharacterized protein OS=Bos taurus GN=MAP4K4 PE=4 SV=2;>tr|W5PUK2|W5PUK2_SHEEP Uncharacterized protein	12	4	4	3	3.9	145.26	3.59e-07	6631700	7370300	5721800	6574600	6695100	9001500		7848300	1.19373	0.314649
W5P8K0;L8I7B0;Q3ZCF0	>tr|W5P8K0|W5P8K0_SHEEP Uncharacterized protein OS=Ovis aries GN=DCTN2 PE=4 SV=1;>tr|L8I7B0|L8I7B0_9CETA Dynactin subunit 2 OS=Bos mutus GN=M91_11208 PE=4 SV=1;>sp|Q3ZCF0|DCTN2_BOVIN Dynactin subunit 2 OS=Bos taurus GN=DCTN2 PE=2 SV=1	3	4	4	4	15	44.844	8.38e-66	54511000	58743000	22942000	4.53987e+07	80415000	57304000	49077000	6.22653e+07	1.37152	0.314663
E1B8K6;L8J1Z3;W5QHQ7;G3MXT4;G3X7M4;G3MYJ0;Q5JB60;W5PUT9;A7E386	>tr|E1B8K6|E1B8K6_BOVIN Uncharacterized protein OS=Bos taurus GN=NCL PE=1 SV=1;>tr|L8J1Z3|L8J1Z3_9CETA Nucleolin (Fragment) OS=Bos mutus GN=M91_11009 PE=4 SV=1;>tr|W5QHQ7|W5QHQ7_SHEEP Uncharacterized protein OS=Ovis aries GN=NCL PE=4 SV=1;>tr|G3MXT4|G3MXT4	9	20	20	4	28.5	77.852	6.72e-97	468950000	283030000	206480000	3.19487e+08	629790000	596220000	239610000	488540000	1.52914	0.314698
Q17R06;W5P3L8;F1MPP1;L8IHK4;C5IJ97;W5PZ15	>sp|Q17R06|RAB21_BOVIN Ras-related protein Rab-21 OS=Bos taurus GN=RAB21 PE=2 SV=1;>tr|W5P3L8|W5P3L8_SHEEP Uncharacterized protein OS=Ovis aries GN=RAB21 PE=4 SV=1;>tr|F1MPP1|F1MPP1_BOVIN Ras-related protein Rab-21 OS=Bos taurus GN=RAB21 PE=4 SV=2;>tr|L8IH	6	7	7	7	36	24.146	3.66e-54	69430000	56441000	23095000	4.96553e+07	75228000	54347000	71901000	6.71587e+07	1.3525	0.314879
L8I7Q2;Q17QL5;W5P931;F1MPT8;L8IXY9;W5NS53	>tr|L8I7Q2|L8I7Q2_9CETA Cell cycle control protein 50A (Fragment) OS=Bos mutus GN=M91_14409 PE=4 SV=1;>sp|Q17QL5|CC50A_BOVIN Cell cycle control protein 50A OS=Bos taurus GN=TMEM30A PE=1 SV=1;>tr|W5P931|W5P931_SHEEP Uncharacterized protein OS=Ovis aries GN=	6	6	6	6	16.3	40.77	6.05e-16	54115000	29874000	113150000	65713000	24150000	45854000	39157000	36387000	0.553726	0.315005
W5P0W0;L8IJV2;F1MXJ5;Q3ZBV1	>tr|W5P0W0|W5P0W0_SHEEP Uncharacterized protein OS=Ovis aries GN=IST1 PE=4 SV=1;>tr|L8IJV2|L8IJV2_9CETA IST1-like protein (Fragment) OS=Bos mutus GN=M91_18207 PE=4 SV=1;>tr|F1MXJ5|F1MXJ5_BOVIN IST1 homolog OS=Bos taurus GN=IST1 PE=4 SV=2;>sp|Q3ZBV1|IST1_BO	4	6	6	6	20.7	41.303	3.13e-12	23584000	27939000	31026000	2.75163e+07	33290000	32767000	26807000	3.09547e+07	1.12496	0.315266
C8BKD0;L8IA24;Q58DH8;W5Q231	>sp|C8BKD0|FEN1_SHEEP Flap endonuclease 1 OS=Ovis aries GN=FEN1 PE=2 SV=1;>tr|L8IA24|L8IA24_9CETA Flap endonuclease 1 OS=Bos mutus GN=FEN1 PE=3 SV=1;>sp|Q58DH8|FEN1_BOVIN Flap endonuclease 1 OS=Bos taurus GN=FEN1 PE=2 SV=1;>tr|W5Q231|W5Q231_SHEEP Flap endo	4	2	2	2	5	42.676	0.0011286	34082000	35981000	65885000	45316000	6232500	47912000	27327000	2.71572e+07	0.599284	0.315497
Q32PF2;Q2TCH3;W5Q8U8	>sp|Q32PF2|ACLY_BOVIN ATP-citrate synthase OS=Bos taurus GN=ACLY PE=2 SV=1;>sp|Q2TCH3|ACLY_SHEEP ATP-citrate synthase OS=Ovis aries GN=ACLY PE=2 SV=1;>tr|W5Q8U8|W5Q8U8_SHEEP ATP-citrate synthase OS=Ovis aries GN=ACLY PE=4 SV=1	3	23	23	23	26.9	119.79	5.83e-189	83212000	153500000	84403000	1.07038e+08	733040000	269020000	31648000	3.44569e+08	3.21912	0.315703
A5PJQ6;W5Q0U6	>tr|A5PJQ6|A5PJQ6_BOVIN PGRMC2 protein OS=Bos taurus GN=PGRMC2 PE=1 SV=1;>tr|W5Q0U6|W5Q0U6_SHEEP Uncharacterized protein OS=Ovis aries PE=3 SV=1	2	7	6	6	35.9	23.71	4.99e-285	158290000	112290000	211000000	1.60527e+08	79419000	131370000	149200000	1.19996e+08	0.747517	0.315784
L8HNA0;F1MUL0;Q08DW0;Q9N0K1;W5QC22	>tr|L8HNA0|L8HNA0_9CETA Leukocyte surface antigen CD47 (Fragment) OS=Bos mutus GN=M91_21356 PE=4 SV=1;>tr|F1MUL0|F1MUL0_BOVIN Leukocyte surface antigen CD47 OS=Bos taurus GN=CD47 PE=4 SV=2;>tr|Q08DW0|Q08DW0_BOVIN CD47 molecule OS=Bos taurus GN=CD47 PE=2 SV	5	2	2	2	6.9	33.562	5.43e-15	41473000	22490000	42059000	3.53407e+07	32288000	48666000	60849000	4.72677e+07	1.33749	0.318533
W5NX12;W5NX11;L8IQA0;Q9N179;F1MCU7;F1MCU4	>tr|W5NX12|W5NX12_SHEEP Uncharacterized protein OS=Ovis aries GN=EPB41 PE=4 SV=1;>tr|W5NX11|W5NX11_SHEEP Uncharacterized protein OS=Ovis aries GN=EPB41 PE=4 SV=1;>tr|L8IQA0|L8IQA0_9CETA Protein 4.1 OS=Bos mutus GN=M91_03269 PE=4 SV=1;>sp|Q9N179|41_BOVIN Pr	6	5	3	3	7.2	96.111	6.02e-15	4285700	5237900		4761800	22419000	6044600	9091400	1.25183e+07	2.62891	0.318554
P11456;W5NTF2;L8IDY7	>sp|P11456|MPRD_BOVIN Cation-dependent mannose-6-phosphate receptor OS=Bos taurus GN=M6PR PE=1 SV=1;>tr|W5NTF2|W5NTF2_SHEEP Uncharacterized protein OS=Ovis aries GN=M6PR PE=4 SV=1;>tr|L8IDY7|L8IDY7_9CETA Cation-dependent mannose-6-phosphate receptor OS=Bos	3	7	7	7	29	31.201	1.45e-87	232240000	423160000	397470000	3.50957e+08	816830000	411850000	358540000	5.29073e+08	1.50752	0.318817
L8I1N1;W5NU06;W5NU08	>tr|L8I1N1|L8I1N1_9CETA Protein transport protein Sec31A OS=Bos mutus GN=M91_10810 PE=4 SV=1;>tr|W5NU06|W5NU06_SHEEP Uncharacterized protein OS=Ovis aries GN=SEC31A PE=4 SV=1;>tr|W5NU08|W5NU08_SHEEP Uncharacterized protein OS=Ovis aries GN=SEC31A PE=4 SV=1	3	22	22	4	18.5	134.33	3.91e-165	115790000	420320000	151950000	2.29353e+08	1218400000	464420000	141050000	6.07957e+08	2.65074	0.319452
D4P8R9;P47843;A2VDL2;P58352;REV__A0A0U1WU05;REV__A0A140JX02;REV__A0A146J863;REV__Q1RML2;REV__W5QH40;REV__L8IC12;L8J1U8	>tr|D4P8R9|D4P8R9_CAPHI Solute carrier family 2 member 3 OS=Capra hircus GN=SLC2A3 PE=2 SV=1;>sp|P47843|GTR3_SHEEP Solute carrier family 2, facilitated glucose transporter member 3 OS=Ovis aries GN=SLC2A3 PE=2 SV=1;>tr|A2VDL2|A2VDL2_BOVIN Solute carrier fa	11	4	4	4	9.3	54.194	3.35e-209	65498000	220910000	101510000	129306000	332110000	145860000		238985000	1.84821	0.319627
L8IY35;P52556	>tr|L8IY35|L8IY35_9CETA Flavin reductase OS=Bos mutus GN=M91_14235 PE=4 SV=1;>sp|P52556|BLVRB_BOVIN Flavin reductase (NADPH) OS=Bos taurus GN=BLVRB PE=1 SV=2	2	2	2	1	11.8	22.732	2.8e-24		155960000	79151000	117555500	59723000	73137000		66430000	0.565095	0.320053
W5P996;F1N759;L8I7V5;Q0VC10	>tr|W5P996|W5P996_SHEEP Platelet-derived growth factor receptor beta OS=Ovis aries GN=PDGFRB PE=3 SV=1;>tr|F1N759|F1N759_BOVIN Platelet-derived growth factor receptor beta OS=Bos taurus GN=PDGFRB PE=3 SV=2;>tr|L8I7V5|L8I7V5_9CETA Receptor protein-tyrosine	4	26	26	25	29.1	123.38	0	1358900000	1185200000	1366000000	1.30337e+09	1069300000	1362900000	1104700000	1.17897e+09	0.904555	0.320556
W5NSP2;K4P1S8;Q5E958;G8JKY0;L8IQM6;Q862P8;W5QFV7;A1XED8	>tr|W5NSP2|W5NSP2_SHEEP 40S ribosomal protein S8 OS=Ovis aries GN=RPS8 PE=3 SV=1;>tr|K4P1S8|K4P1S8_SHEEP 40S ribosomal protein S8 OS=Ovis aries GN=RPS8 PE=2 SV=1;>sp|Q5E958|RS8_BOVIN 40S ribosomal protein S8 OS=Bos taurus GN=RPS8 PE=2 SV=3;>tr|G8JKY0|G8JKY	8	8	8	8	43.2	25.536	2.01e-192	536060000	581030000	276530000	464540000	858890000	857760000	342890000	6.86513e+08	1.47783	0.321302
W5Q9E9;L8IR10;A6QLP7;W5Q9F1	>tr|W5Q9E9|W5Q9E9_SHEEP Uncharacterized protein OS=Ovis aries GN=SSR1 PE=4 SV=1;>tr|L8IR10|L8IR10_9CETA Uncharacterized protein OS=Bos mutus GN=M91_06214 PE=4 SV=1;>sp|A6QLP7|SSRA_BOVIN Translocon-associated protein subunit alpha OS=Bos taurus GN=SSR1 PE=2	4	4	4	4	16.4	34.454	6.23e-119	462840000	281690000	839870000	5.28133e+08	131650000	314640000	483120000	3.09803e+08	0.586601	0.321638
L8J4I2;Q3MHK9	>tr|L8J4I2|L8J4I2_9CETA Fascin (Fragment) OS=Bos mutus GN=M91_16385 PE=4 SV=1;>tr|Q3MHK9|Q3MHK9_BOVIN Fascin OS=Bos taurus GN=FSCN1 PE=1 SV=1	2	16	16	3	35.8	57.043	1.56e-152	215400000	397400000	222290000	2.78363e+08	1135800000	478710000	189790000	6.01433e+08	2.16061	0.322032
B3VSB7;L8HKI5;P29105;W5Q1F1	>sp|B3VSB7|HPCL1_SHEEP Hippocalcin-like protein 1 OS=Ovis aries GN=HPCAL1 PE=2 SV=1;>tr|L8HKI5|L8HKI5_9CETA Hippocalcin-like protein 1 OS=Bos mutus GN=M91_12562 PE=4 SV=1;>sp|P29105|HPCL1_BOVIN Hippocalcin-like protein 1 OS=Bos taurus GN=HPCAL1 PE=1 SV=4;>	4	9	9	5	50.3	22.285	1.19e-79	108460000	134260000	109620000	1.17447e+08	232200000	171680000	90358000	164746000	1.40273	0.32253
L8IXT7;Q2TBK5;W5Q6Y6	>tr|L8IXT7|L8IXT7_9CETA Transmembrane emp24 domain-containing protein 1 (Fragment) OS=Bos mutus GN=M91_04918 PE=3 SV=1;>sp|Q2TBK5|TMED1_BOVIN Transmembrane emp24 domain-containing protein 1 OS=Bos taurus GN=TMED1 PE=2 SV=1;>tr|W5Q6Y6|W5Q6Y6_SHEEP Uncharact	3	5	5	5	23.8	25.65	4.22e-18	84308000	43431000	136960000	88233000	31512000	84195000	42666000	52791000	0.598314	0.322937
L8IC85;Q9TTJ5;A0A0K0M954;B3VSC1;W5PWI4	>tr|L8IC85|L8IC85_9CETA Regucalcin OS=Bos mutus GN=M91_07840 PE=4 SV=1;>sp|Q9TTJ5|RGN_BOVIN Regucalcin OS=Bos taurus GN=RGN PE=2 SV=1;>tr|A0A0K0M954|A0A0K0M954_BUBBU Regucalcin (Fragment) OS=Bubalus bubalis PE=2 SV=1;>tr|B3VSC1|B3VSC1_SHEEP Regucalcin OS=O	5	6	6	6	27.4	33.307	2.14e-58	18981000	254660000	70055000	1.14565e+08	60126000	17246000	20309000	3.25603e+07	0.284208	0.323579
W5Q5L0;L8I5N2;F1MYS7;Q3MHP6	>tr|W5Q5L0|W5Q5L0_SHEEP Uncharacterized protein OS=Ovis aries GN=EIF4B PE=4 SV=1;>tr|L8I5N2|L8I5N2_9CETA Eukaryotic translation initiation factor 4B (Fragment) OS=Bos mutus GN=M91_05605 PE=4 SV=1;>tr|F1MYS7|F1MYS7_BOVIN Uncharacterized protein OS=Bos tauru	4	7	7	7	12.8	69.375	2.66e-42	18406000	31416000	18901000	2.29077e+07	149530000	42938000	15107000	6.91917e+07	3.02046	0.32398
Q3T0V3;W5P6X4;L8HR63	>sp|Q3T0V3|EIF3K_BOVIN Eukaryotic translation initiation factor 3 subunit K OS=Bos taurus GN=EIF3K PE=2 SV=1;>tr|W5P6X4|W5P6X4_SHEEP Eukaryotic translation initiation factor 3 subunit K OS=Ovis aries GN=EIF3K PE=3 SV=1;>tr|L8HR63|L8HR63_9CETA Eukaryotic tr	3	5	5	5	25.2	25.073	7.36e-34	57948000	52549000	42445000	5.09807e+07	95335000	90680000	34480000	7.34983e+07	1.44169	0.324809
Q3ZBD0;W5P0D5;A1L5B1	>sp|Q3ZBD0|PSMD7_BOVIN 26S proteasome non-ATPase regulatory subunit 7 OS=Bos taurus GN=PSMD7 PE=2 SV=1;>tr|W5P0D5|W5P0D5_SHEEP Uncharacterized protein OS=Ovis aries GN=PSMD7 PE=4 SV=1;>tr|A1L5B1|A1L5B1_BOVIN Proteasome 26S non-ATPase subunit 7 (Fragment) O	3	3	3	3	9.9	36.754	1.13e-16	15293000	15868000	11023000	1.40613e+07	8993600	11192000	14531000	11572200	0.82298	0.324882
W5P1U6;W5P751	>tr|W5P1U6|W5P1U6_SHEEP Uncharacterized protein OS=Ovis aries PE=4 SV=1;>tr|W5P751|W5P751_SHEEP Uncharacterized protein OS=Ovis aries PE=4 SV=1	2	10	10	1	40.7	29.154	9.82e-92	505270000	559310000	383020000	4.82533e+08	789170000	803670000	367090000	653310000	1.35392	0.325118
L8HQM1;A6YRY8;D5HKJ4;E7BKH6;F8UZU9;P26452;W5NWR3;W5Q7U8;Q862H8;B0L704;W5Q7F4;B0L703;S5TPD7;Q862N6;W5PCI9;L8J0Z4	>tr|L8HQM1|L8HQM1_9CETA 40S ribosomal protein SA OS=Bos mutus GN=RPSA PE=3 SV=1;>sp|A6YRY8|RSSA_SHEEP 40S ribosomal protein SA OS=Ovis aries GN=RPSA PE=2 SV=1;>tr|D5HKJ4|D5HKJ4_SHEEP 40S ribosomal protein SA OS=Ovis aries GN=RPSA PE=3 SV=1;>tr|E7BKH6|E7BKH	16	11	11	11	46.7	33.56	5.41e-217	429690000	438050000	289300000	385680000	1338500000	604110000	279630000	7.40747e+08	1.92063	0.32526
L8IFI4;W5P765;Q3T0K2;Q58DJ8;F1N5P4	>tr|L8IFI4|L8IFI4_9CETA T-complex protein 1 subunit gamma (Fragment) OS=Bos mutus GN=M91_20900 PE=3 SV=1;>tr|W5P765|W5P765_SHEEP T-complex protein 1 subunit gamma OS=Ovis aries GN=CCT3 PE=3 SV=1;>sp|Q3T0K2|TCPG_BOVIN T-complex protein 1 subunit gamma OS=Bo	5	31	31	31	59.1	63.599	8.5e-297	1022600000	1363600000	834500000	1.07357e+09	1007300000	974670000	363100000	781690000	0.728124	0.325283
W5Q553;A0A0S1LL73;F1N1A9;P80746;B0FYY5;J7H550;J9ZXG5;A7YY42;Q8MKD4;Q95N84;A0A192HDC4	>tr|W5Q553|W5Q553_SHEEP Uncharacterized protein OS=Ovis aries GN=ITGAV PE=3 SV=1;>tr|A0A0S1LL73|A0A0S1LL73_BOSIN ITGAV OS=Bos indicus PE=3 SV=1;>tr|F1N1A9|F1N1A9_BOVIN Integrin alpha-V OS=Bos taurus GN=ITGAV PE=3 SV=2;>sp|P80746|ITAV_BOVIN Integrin alpha-V	11	29	29	29	29.6	116.57	5.53e-186	595070000	421480000	486090000	500880000	536440000	519910000	725000000	5.93783e+08	1.18548	0.325801
B0FZL9;Q3SZR8;G1DFT3;W5Q7C1	>tr|B0FZL9|B0FZL9_SHEEP Pre-mRNA splicing factor SRP20-like protein OS=Ovis aries GN=SRSF3 PE=2 SV=1;>sp|Q3SZR8|SRSF3_BOVIN Serine/arginine-rich splicing factor 3 OS=Bos taurus GN=SRSF3 PE=2 SV=1;>tr|G1DFT3|G1DFT3_CAPHI Splicing factor OS=Capra hircus GN=S	4	2	1	1	14	19.329	2.86e-06	5589100	5388000		5488550	15114000	6708500		10911250	1.988	0.326111
L8HRD1;Q08E42;W5PH89	>tr|L8HRD1|L8HRD1_9CETA Leucine-rich repeat-containing protein 8A OS=Bos mutus GN=M91_13515 PE=4 SV=1;>tr|Q08E42|Q08E42_BOVIN Leucine rich repeat containing 8 family, member A OS=Bos taurus GN=LLRC8A PE=2 SV=1;>tr|W5PH89|W5PH89_SHEEP Uncharacterized protei	3	6	6	6	7.4	94.009	3.53e-13	19240000	25256000	43310000	2.92687e+07	24341000	19532000	19043000	20972000	0.716534	0.326532
F1MSB5;W5NW20;L8J4I9;W5NW23;Q2TBT2	>tr|F1MSB5|F1MSB5_BOVIN Uncharacterized protein OS=Bos taurus GN=GORASP2 PE=1 SV=1;>tr|W5NW20|W5NW20_SHEEP Uncharacterized protein OS=Ovis aries GN=GORASP2 PE=4 SV=1;>tr|L8J4I9|L8J4I9_9CETA Golgi reassembly-stacking protein 2 (Fragment) OS=Bos mutus GN=M91	5	3	3	3	8.1	47.577	1.3e-15	73727000	41174000	2179400	39026800	20995000	14931000	11247000	1.57243e+07	0.402911	0.326854
L8HQP8;I1W1N1;P61223;W5NSD5;W5Q9V4;L8ITS0;E1BNX1	>tr|L8HQP8|L8HQP8_9CETA Ras-related protein Rap-1b (Fragment) OS=Bos mutus GN=M91_15466 PE=4 SV=1;>tr|I1W1N1|I1W1N1_CAPHI Ras-related protein Rap-1B OS=Capra hircus GN=RAP1B PE=2 SV=1;>sp|P61223|RAP1B_BOVIN Ras-related protein Rap-1b OS=Bos taurus GN=RAP1B	7	10	10	4	62.9	21.029	4.48e-216	940870000	914320000	713680000	856290000	888140000	1199700000	898640000	9.95493e+08	1.16257	0.327195
L8HRJ5;P61356;P61357;A0A140GI28;W5PHP6;W5P2M4;L8IVX5	>tr|L8HRJ5|L8HRJ5_9CETA 60S ribosomal protein L27 OS=Bos mutus GN=M91_15220 PE=3 SV=1;>sp|P61356|RL27_BOVIN 60S ribosomal protein L27 OS=Bos taurus GN=RPL27 PE=2 SV=2;>sp|P61357|RL27_CERNI 60S ribosomal protein L27 OS=Cervus nippon GN=RPL27 PE=2 SV=2;>tr|A	7	4	4	4	36	15.798	2.55e-64	267020000	251150000	78076000	1.98749e+08	471940000	371190000	139300000	3.27477e+08	1.64769	0.327813
F1MEN8;Q29RV1;Q6KDN4	>tr|F1MEN8|F1MEN8_BOVIN Protein disulfide-isomerase A4 OS=Bos taurus GN=PDIA4 PE=3 SV=1;>sp|Q29RV1|PDIA4_BOVIN Protein disulfide-isomerase A4 OS=Bos taurus GN=PDIA4 PE=2 SV=1	3	22	22	10	40.3	72.497	3.41e-267	571880000	406180000	816030000	598030000	422090000	432100000	527410000	4.60533e+08	0.770084	0.328557
G3MY77;W5QAP9;W5QAQ0	>tr|G3MY77|G3MY77_BOVIN Uncharacterized protein OS=Bos taurus GN=MAGT1 PE=4 SV=1;>tr|W5QAP9|W5QAP9_SHEEP Uncharacterized protein OS=Ovis aries GN=MAGT1 PE=4 SV=1;>tr|W5QAQ0|W5QAQ0_SHEEP Uncharacterized protein OS=Ovis aries GN=MAGT1 PE=4 SV=1	3	4	4	4	7.3	41.343	1.94e-08	29446000	26219000	85971000	47212000	13689000	25234000	34879000	2.46007e+07	0.521068	0.328713
E1BNJ0;L8HNA5;W5PWM2	>tr|E1BNJ0|E1BNJ0_BOVIN Uncharacterized protein OS=Bos taurus GN=TMEM33 PE=4 SV=2;>tr|L8HNA5|L8HNA5_9CETA Transmembrane protein 33 (Fragment) OS=Bos mutus GN=M91_19682 PE=4 SV=1;>tr|W5PWM2|W5PWM2_SHEEP Uncharacterized protein OS=Ovis aries PE=4 SV=1	3	6	6	6	22.4	27.913	1.5e-13	28443000	27607000	41532000	3.25273e+07	13711000	26899000	32858000	2.44893e+07	0.752885	0.328796
W5PEE9	>tr|W5PEE9|W5PEE9_SHEEP Uncharacterized protein OS=Ovis aries GN=LAMP1 PE=3 SV=1	1	2	2	1	3.8	42.095	7.36e-06	97689000	123680000	161710000	127693000	120710000	167780000	181850000	156780000	1.22779	0.329437
W5PQL4;W5PMU6;E1BI15;L8I9N3;A6QNS8;Q58CQ4	>tr|W5PQL4|W5PQL4_SHEEP Uncharacterized protein OS=Ovis aries GN=TPM2 PE=3 SV=1	6	20	12	4	57	32.975	3.16e-218	2572900000	989850000	520110000	1.36095e+09	142220000	460880000	1176300000	5.93133e+08	0.435822	0.32949
F1MWD3;W5PXX7;L8IAU0;Q3T115	>tr|F1MWD3|F1MWD3_BOVIN Uncharacterized protein OS=Bos taurus GN=CCT5 PE=1 SV=2;>tr|W5PXX7|W5PXX7_SHEEP Uncharacterized protein OS=Ovis aries GN=CCT5 PE=3 SV=1;>tr|L8IAU0|L8IAU0_9CETA T-complex protein 1 subunit epsilon (Fragment) OS=Bos mutus GN=M91_05557	4	26	26	26	62.7	59.614	0	795430000	885190000	696330000	7.92317e+08	891580000	587220000	315990000	5.98263e+08	0.755081	0.329584
A5D7E2;L8J050	>sp|A5D7E2|TM9S4_BOVIN Transmembrane 9 superfamily member 4 OS=Bos taurus GN=TM9SF4 PE=2 SV=2;>tr|L8J050|L8J050_9CETA Transmembrane 9 superfamily member (Fragment) OS=Bos mutus GN=M91_18099 PE=3 SV=1	2	5	5	1	9	74.366	1.81e-38	54000000	37068000	262390000	1.17819e+08	27649000	38018000	46185000	37284000	0.316451	0.329783
B2LU28;Q5KR49;W5QI04;G3X7S7	>tr|B2LU28|B2LU28_SHEEP TPM1 OS=Ovis aries PE=2 SV=1;>sp|Q5KR49|TPM1_BOVIN Tropomyosin alpha-1 chain OS=Bos taurus GN=TPM1 PE=2 SV=1;>tr|W5QI04|W5QI04_SHEEP Uncharacterized protein OS=Ovis aries GN=TPM1 PE=3 SV=1;>tr|G3X7S7|G3X7S7_BOVIN Tropomyosin alpha-1	4	20	2	0	51.8	32.694	4.92e-154	319840000	162620000	126420000	202960000		100690000	126030000	113360000	0.558534	0.329878
P81947;W5QC38;W5QC37;C5ISA2;L8J034;P81948;W5NVF9	>sp|P81947|TBA1B_BOVIN Tubulin alpha-1B chain OS=Bos taurus PE=1 SV=2;>tr|W5QC38|W5QC38_SHEEP Tubulin alpha chain OS=Ovis aries GN=LOC106990101 PE=1 SV=1;>tr|W5QC37|W5QC37_SHEEP Tubulin alpha chain OS=Ovis aries GN=LOC106990101 PE=3 SV=1;>tr|C5ISA2|C5ISA2_	7	19	2	1	59.4	50.151	0	278180000	226530000	105630000	2.03447e+08	159960000	176140000	74878000	1.36993e+08	0.673359	0.330206
E1BJH3	>tr|E1BJH3|E1BJH3_BOVIN Uncharacterized protein OS=Bos taurus GN=CNTRL PE=4 SV=2	1	3	3	2	1.3	269.61	1.39e-05	27721000	21811000	76179000	4.19037e+07	12513000	19508000		16010500	0.382079	0.331154
W5PQA8;L8IXN6;M4T8F1;O77834	>tr|W5PQA8|W5PQA8_SHEEP Uncharacterized protein OS=Ovis aries GN=PRDX6 PE=4 SV=1;>tr|L8IXN6|L8IXN6_9CETA Peroxiredoxin-6 OS=Bos mutus GN=M91_17764 PE=4 SV=1;>tr|M4T8F1|M4T8F1_SHEEP Peroxiredoxin 6 OS=Ovis aries GN=Prdx6 PE=2 SV=1;>sp|O77834|PRDX6_BOVIN Per	4	8	8	8	36.6	25.28	2.51e-38	52688000	141850000	63949000	8.61623e+07	77200000	53869000	19075000	50048000	0.580857	0.331726
X2J1X8;P80209;Q9MZS8;W5P4H9;W5P4I2;W5P1A3;C9DFF9	>tr|X2J1X8|X2J1X8_CAPHI Cathepsin D (Fragment) OS=Capra hircus GN=CTSD PE=2 SV=1;>sp|P80209|CATD_BOVIN Cathepsin D OS=Bos taurus GN=CTSD PE=1 SV=2;>sp|Q9MZS8|CATD_SHEEP Cathepsin D (Fragment) OS=Ovis aries GN=CTSD PE=1 SV=1	7	8	8	1	23.1	44.596	6.98e-35	232410000	224130000	461470000	3.06003e+08	327050000	357950000	819050000	501350000	1.63838	0.331889
L8IMF2;W5NZP8;A2VDK6;W5NZP9	>tr|L8IMF2|L8IMF2_9CETA Wiskott-Aldrich syndrome protein family member 2 (Fragment) OS=Bos mutus GN=M91_13429 PE=4 SV=1;>tr|W5NZP8|W5NZP8_SHEEP Uncharacterized protein OS=Ovis aries GN=WASF2 PE=4 SV=1;>sp|A2VDK6|WASF2_BOVIN Wiskott-Aldrich syndrome protein	4	3	3	3	6.6	54.461	1.18e-09	13403000	14876000		14139500	15020000	20807000		17913500	1.26691	0.333601
W5PFI3;L8IPC3;P11024	>tr|W5PFI3|W5PFI3_SHEEP Uncharacterized protein OS=Ovis aries GN=NNT PE=4 SV=1;>tr|L8IPC3|L8IPC3_9CETA NAD(P) transhydrogenase, mitochondrial OS=Bos mutus GN=M91_04961 PE=4 SV=1;>sp|P11024|NNTM_BOVIN NAD(P) transhydrogenase, mitochondrial OS=Bos taurus GN=	3	9	9	9	9.1	113.53	1.29e-34	94475000		125750000	110112500	30477000	57563000	119030000	6.90233e+07	0.626844	0.333992
W5PKK8;R9ZY63	>tr|W5PKK8|W5PKK8_SHEEP Uncharacterized protein OS=Ovis aries GN=ESYT1 PE=4 SV=1	2	25	25	2	26.5	122.88	1.31e-219	1054700000	840170000	1439500000	1.11146e+09	509170000	919320000	1094100000	8.40863e+08	0.756542	0.334054
Q32KV9;W5PCW9;W5PCX2;L8J2P0	>tr|Q32KV9|Q32KV9_BOVIN Phosphatidic acid phosphatase type 2A OS=Bos taurus GN=PPAP2A PE=2 SV=1;>tr|W5PCW9|W5PCW9_SHEEP Uncharacterized protein OS=Ovis aries GN=PLPP1 PE=4 SV=1;>tr|W5PCX2|W5PCX2_SHEEP Uncharacterized protein OS=Ovis aries GN=PLPP1 PE=4 SV=	4	4	4	4	18.6	32.27	4.88e-43	45474000	31118000	68525000	4.83723e+07	59344000	48413000	167830000	9.18623e+07	1.89907	0.334214
G3N348;W5P703;L8I3I6	>tr|G3N348|G3N348_BOVIN Uncharacterized protein OS=Bos taurus GN=WFS1 PE=4 SV=1;>tr|W5P703|W5P703_SHEEP Uncharacterized protein OS=Ovis aries GN=WFS1 PE=4 SV=1;>tr|L8I3I6|L8I3I6_9CETA Wolframin OS=Bos mutus GN=M91_14532 PE=4 SV=1	3	6	6	6	6.5	99.741	1.5e-15	27218000	25564000	26392000	2.63913e+07		23506000	63498000	43502000	1.64834	0.334542
Q862I1;W5QAY7;Q862D6;W5P0G2;L8IB40	>sp|Q862I1|RL24_BOVIN 60S ribosomal protein L24 OS=Bos taurus GN=RPL24 PE=2 SV=2;>tr|W5QAY7|W5QAY7_SHEEP Uncharacterized protein OS=Ovis aries GN=RPL24 PE=4 SV=1;>tr|Q862D6|Q862D6_BOVIN Similar to ribosomal protein L30 (Fragment) OS=Bos taurus PE=2 SV=1	5	10	10	10	50.3	17.779	2.41e-68	199300000	277770000	85369000	1.8748e+08	396630000	467740000	105290000	323220000	1.72403	0.335684
W5Q084;L8ICD0;B6Z9S4;P00514;W5Q086;Q17QF5;W5NSX5;L8HP00	>tr|W5Q084|W5Q084_SHEEP Uncharacterized protein OS=Ovis aries GN=PRKAR1A PE=4 SV=1;>tr|L8ICD0|L8ICD0_9CETA cAMP-dependent protein kinase type I-alpha regulatory subunit (Fragment) OS=Bos mutus GN=M91_10352 PE=4 SV=1;>tr|B6Z9S4|B6Z9S4_SHEEP cAMP-dependent p	8	5	5	5	13.9	45.579	1.87e-25	44163000	32509000	24113000	33595000	29349000		18246000	23797500	0.708364	0.335912
W5PK78;W5PK79;F1N0E6;L8I5I3	>tr|W5PK78|W5PK78_SHEEP Uncharacterized protein OS=Ovis aries GN=VWA5A PE=4 SV=1;>tr|W5PK79|W5PK79_SHEEP Uncharacterized protein OS=Ovis aries GN=VWA5A PE=4 SV=1;>tr|F1N0E6|F1N0E6_BOVIN Uncharacterized protein OS=Bos taurus GN=VWA5A PE=4 SV=2;>tr|L8I5I3|L8	4	8	8	8	11.9	88.045	2.25e-29	13558000	19722000		16640000	107270000	46880000	15336000	5.64953e+07	3.39515	0.336294
L8IHH4;L8IVI9;F1MFG9;W5PXT1	>tr|L8IHH4|L8IHH4_9CETA Myosin-Id (Fragment) OS=Bos mutus GN=M91_10427 PE=3 SV=1	4	44	1	0	49.7	113.63	0	65962000	62689000	86051000	7.15673e+07	53467000	107740000	137670000	9.96257e+07	1.39206	0.336337
L8HRI7;P30931;W5Q7B0	>tr|L8HRI7|L8HRI7_9CETA Tissue factor OS=Bos mutus GN=M91_19596 PE=3 SV=1;>sp|P30931|TF_BOVIN Tissue factor OS=Bos taurus GN=F3 PE=1 SV=1;>tr|W5Q7B0|W5Q7B0_SHEEP Tissue factor OS=Ovis aries GN=F3 PE=3 SV=1	3	3	3	3	13.4	32.475	8.8e-40	85103000	51164000	44859000	6.03753e+07		44914000	38617000	41765500	0.691764	0.336537
A6QLD1;L8I6L8;L8I2H0;W5PMH3;W5P9Y9;W5PA55	>tr|A6QLD1|A6QLD1_BOVIN EXOC4 protein OS=Bos taurus GN=EXOC4 PE=2 SV=1;>tr|L8I6L8|L8I6L8_9CETA Exocyst complex component 4 (Fragment) OS=Bos mutus GN=M91_10131 PE=4 SV=1	6	8	8	8	11.4	110.48	7.36e-44	19872000	22284000	21765000	21307000	54020000	33757000	13999000	3.39253e+07	1.59222	0.336983
F1MPE5;W5NXX1;L8IHD9	>tr|F1MPE5|F1MPE5_BOVIN Uncharacterized protein OS=Bos taurus GN=IPO5 PE=1 SV=2;>tr|W5NXX1|W5NXX1_SHEEP Uncharacterized protein OS=Ovis aries GN=IPO5 PE=4 SV=1;>tr|L8IHD9|L8IHD9_9CETA Importin-5 (Fragment) OS=Bos mutus GN=M91_18745 PE=4 SV=1	3	12	12	6	13.9	125.02	1.49e-56	88298000	89514000	80260000	86024000	95979000	68739000	34736000	6.64847e+07	0.772862	0.337586
L8IS72;P02253;W5QFP2;W5NTA0	>tr|L8IS72|L8IS72_9CETA Histone H1.3 OS=Bos mutus GN=M91_11362 PE=3 SV=1;>sp|P02253|H12_BOVIN Histone H1.2 OS=Bos taurus GN=HIST1H1C PE=1 SV=2;>tr|W5QFP2|W5QFP2_SHEEP Uncharacterized protein OS=Ovis aries GN=HIST1H1D PE=3 SV=1;>tr|W5NTA0|W5NTA0_SHEEP Uncha	4	8	8	1	35.7	21.355	4.51e-20	811030000	238370000	61784000	3.70395e+08	58985000	131580000	175490000	1.22018e+08	0.329428	0.338487
E1BBT8	>tr|E1BBT8|E1BBT8_BOVIN Uncharacterized protein OS=Bos taurus GN=EMC1 PE=4 SV=2	1	12	12	2	15.1	111.82	3.59e-70	144480000	112540000	302300000	186440000	66670000	117060000	164120000	115950000	0.621916	0.339535
W5QBF8	>tr|W5QBF8|W5QBF8_SHEEP Uncharacterized protein OS=Ovis aries GN=PRKCDBP PE=4 SV=1	1	2	1	1	8.9	28.425	9.21e-07	11770000	19676000	13919000	1.51217e+07	36647000	13398000	19239000	2.30947e+07	1.52726	0.340245
P48818;W5PLW6;L8I0M2	>sp|P48818|ACADV_BOVIN Very long-chain specific acyl-CoA dehydrogenase, mitochondrial OS=Bos taurus GN=ACADVL PE=2 SV=3;>tr|W5PLW6|W5PLW6_SHEEP Uncharacterized protein OS=Ovis aries GN=ACADVL PE=4 SV=1;>tr|L8I0M2|L8I0M2_9CETA Very long-chain specific acyl-	3	5	5	5	8.4	70.648	7.82e-14	17260000	8948000	27402000	17870000		15947000	59801000	37874000	2.11942	0.341426
C5IJ99;I1VE57;L8HRB3;P61585;W5Q4M2	>tr|C5IJ99|C5IJ99_SHEEP RHOA OS=Ovis aries GN=RHOA PE=2 SV=1;>tr|I1VE57|I1VE57_CAPHI Ras-like protein family member A OS=Capra hircus GN=RHOA PE=2 SV=1;>tr|L8HRB3|L8HRB3_9CETA Transforming protein RhoA OS=Bos mutus GN=M91_16974 PE=4 SV=1;>sp|P61585|RHOA_BO	5	7	7	3	44.6	21.768	3.17e-165	497030000	362530000	449160000	436240000	436420000	611570000	474700000	5.07563e+08	1.1635	0.341618
W5PI66;Q3ZBB0	>tr|W5PI66|W5PI66_SHEEP Uncharacterized protein OS=Ovis aries GN=SLC35B2 PE=4 SV=1;>tr|Q3ZBB0|Q3ZBB0_BOVIN Solute carrier family 35, member B2 OS=Bos taurus GN=SLC35B2 PE=2 SV=1	2	1	1	1	2.8	47.745	0.00030955	6857100	6502300	19910000	11089800	3120200	5995500		4557850	0.410995	0.341676
A0A097C2Y8;L8INV1;P80311;W5QHU9;Q5TIK9;Q862P3;Q862J7;L8IC73;W5PJF3;P30404	>tr|A0A097C2Y8|A0A097C2Y8_CAPHI Peptidyl-prolyl cis-trans isomerase (Fragment) OS=Capra hircus GN=PPIB PE=2 SV=1;>tr|L8INV1|L8INV1_9CETA Peptidyl-prolyl cis-trans isomerase OS=Bos mutus GN=M91_14383 PE=3 SV=1;>sp|P80311|PPIB_BOVIN Peptidyl-prolyl cis-trans	10	11	11	10	50.9	23.729	3.23e-130	1904000000	1510000000	1395500000	1.60317e+09	930590000	1125200000	1782600000	1.27946e+09	0.798085	0.341685
F1MYA8;L8HNU4;Q148L2	>tr|F1MYA8|F1MYA8_BOVIN Cation-transporting ATPase OS=Bos taurus GN=ATP13A1 PE=3 SV=1;>tr|L8HNU4|L8HNU4_9CETA Cation-transporting ATPase OS=Bos mutus GN=M91_19324 PE=3 SV=1	3	8	8	4	8.3	132.59	4.24e-16	60194000	43795000	70567000	5.81853e+07	38796000	22943000	65476000	42405000	0.728792	0.342165
L8J2P8;W5P2V5;W5PDK8;W5PLA8;W5Q585;W5Q9T9;W5QEI4;F1MQJ8;K4P217;Q3T025;W5P1B4;W5PPE7;Q862E3;Q862J9;W5QAQ6;G3N288;F1N0W3;W5PYN0;L8IBV9;Q862T7;E1BG46;W5Q6L2;W5PKS4;Q30B84;Q862H0;G3N3W9;Q862J1;G1DFW2;E1B871;L8IBA4;Q862F1;L8HS48;W5QFP6;L8I9X1;A1XED3;W5PE72;L8IPM2	>tr|L8J2P8|L8J2P8_9CETA 60S ribosomal protein L17 (Fragment) OS=Bos mutus GN=M91_10239 PE=3 SV=1;>tr|W5P2V5|W5P2V5_SHEEP Uncharacterized protein OS=Ovis aries PE=3 SV=1;>tr|W5PDK8|W5PDK8_SHEEP Uncharacterized protein OS=Ovis aries PE=3 SV=1;>tr|W5PLA8|W5PL	37	6	6	6	35.8	21.735	1.07e-38	223880000	272290000	71466000	189212000	350690000	389780000	142500000	2.94323e+08	1.55552	0.342688
A7MBH9;W5PKD3;L8IUW5;C5ISA7;A4F2F7;Q95KM8;Q7M3G9;I7A149	>tr|A7MBH9|A7MBH9_BOVIN GNAI2 protein OS=Bos taurus GN=GNAI2 PE=2 SV=1;>tr|W5PKD3|W5PKD3_SHEEP Uncharacterized protein OS=Ovis aries GN=GNAI2 PE=4 SV=1;>tr|L8IUW5|L8IUW5_9CETA Guanine nucleotide-binding protein G(I) subunit alpha-2 (Fragment) OS=Bos mutus	8	16	16	9	62.5	40.477	0	3950700000	2432500000	3651300000	3.34483e+09	1672600000	2803300000	3364700000	2.61353e+09	0.781364	0.343072
K4P438;M5FK91;Q5E984;W5PCK8;A5JST3;L8IQG3;W5NS38;W5Q4V2;L8IKK7;Q862L1;A0A096P6K4;B0FZM6;F1MS78;L8HPN4	>tr|K4P438|K4P438_SHEEP Tumor protein translationally-controlled 1 OS=Ovis aries GN=TCTP PE=2 SV=1;>tr|M5FK91|M5FK91_BOVIN Tumor protein, translationally-controlled 1-like OS=Bos taurus GN=LOC100337367 PE=3 SV=1;>sp|Q5E984|TCTP_BOVIN Translationally-contro	14	6	6	6	55.8	19.581	8.55e-249	75035000	88447000	74950000	7.94773e+07	316870000	101600000	70130000	1.62867e+08	2.04922	0.343413
A4IFP2	>tr|A4IFP2|A4IFP2_BOVIN KRT4 protein OS=Bos taurus GN=KRT4 PE=2 SV=1	1	11	2	0	13.5	58.046	1.31e-28	111330000	66165000	80615000	8.60367e+07	56964000	137020000	234560000	142848000	1.66032	0.344521
L8IGA6;Q08E32;W5PGC1;L8J250;L8HRK5;Q2HJ35;W5PZJ0	>tr|L8IGA6|L8IGA6_9CETA Charged multivesicular body protein 4b OS=Bos mutus GN=M91_05160 PE=4 SV=1;>tr|Q08E32|Q08E32_BOVIN CHMP4B protein OS=Bos taurus GN=CHMP4B PE=1 SV=2;>tr|W5PGC1|W5PGC1_SHEEP Uncharacterized protein OS=Ovis aries GN=CHMP4B PE=4 SV=1	7	10	10	10	49.6	24.936	2.29e-64	236640000	156360000	136650000	176550000	118810000	192880000	62183000	1.24624e+08	0.705887	0.345974
W5PVL5;W5QGF5;W5Q334;E1BBT9	>tr|W5PVL5|W5PVL5_SHEEP Uncharacterized protein OS=Ovis aries GN=HSPA4 PE=3 SV=1	4	16	16	1	26.8	94.529	1.42e-142	147630000	124450000	67597000	1.13226e+08	123100000	72326000	28961000	7.47957e+07	0.660589	0.347421
L8IDN9;Q32LC7;W5PH87;W5PH90	>tr|L8IDN9|L8IDN9_9CETA Ras GTPase-activating protein-binding protein 1 (Fragment) OS=Bos mutus GN=M91_20719 PE=4 SV=1;>sp|Q32LC7|G3BP1_BOVIN Ras GTPase-activating protein-binding protein 1 OS=Bos taurus GN=G3BP PE=2 SV=1;>tr|W5PH87|W5PH87_SHEEP Uncharacte	4	11	11	10	31.6	54.095	1.76e-48	66484000	108000000	15645000	6.33763e+07	403360000	140180000	18233000	1.87258e+08	2.95469	0.348423
Q3B7N0;F1MKP6;W5PIJ5	>sp|Q3B7N0|CAD13_BOVIN Cadherin-13 OS=Bos taurus GN=CDH13 PE=2 SV=1;>tr|F1MKP6|F1MKP6_BOVIN Cadherin-13 OS=Bos taurus GN=CDH13 PE=4 SV=2;>tr|W5PIJ5|W5PIJ5_SHEEP Uncharacterized protein OS=Ovis aries GN=CDH13 PE=4 SV=1	3	14	14	14	24.7	78.196	3.6e-213	1756300000	1411000000	799860000	1.32239e+09	1590400000	2115000000	1387200000	1.69753e+09	1.28369	0.348824
W5QCS4;B0LRP3	>tr|W5QCS4|W5QCS4_SHEEP Uncharacterized protein OS=Ovis aries GN=SARS PE=4 SV=1	2	12	12	2	28.8	58.871	2.55e-76	190710000	259830000	115700000	1.88747e+08	172810000	156270000	73695000	1.34258e+08	0.711315	0.351283
G3X6L5;C5IWT8;L8IAB3	>tr|G3X6L5|G3X6L5_BOVIN Uncharacterized protein OS=Bos taurus GN=ARL8A PE=3 SV=1;>tr|C5IWT8|C5IWT8_SHEEP ADP-ribosylation factor-like 8A OS=Ovis aries GN=ARL8A PE=2 SV=1	3	3	1	1	22.9	20.484	9.43e-248	22043000	13910000	37512000	2.44883e+07	27370000	27295000	56668000	37111000	1.51546	0.351506
W5QFQ1;L8I8A8;Q3T145;W5QFQ0	>tr|W5QFQ1|W5QFQ1_SHEEP Malate dehydrogenase OS=Ovis aries GN=MDH1 PE=3 SV=1;>tr|L8I8A8|L8I8A8_9CETA Malate dehydrogenase (Fragment) OS=Bos mutus GN=M91_21510 PE=3 SV=1;>sp|Q3T145|MDHC_BOVIN Malate dehydrogenase, cytoplasmic OS=Bos taurus GN=MDH1 PE=2 SV=3	4	4	4	4	16.8	38.467	8.67e-37	26506000	18920000		22713000	14972000	19696000		17334000	0.763175	0.351812
C7EDS5;O18739;I0BWK3;W5PXV3;L8HVI0;Q862T0	>tr|C7EDS5|C7EDS5_SHEEP Connective tissue growth factor OS=Ovis aries PE=2 SV=1;>sp|O18739|CTGF_BOVIN Connective tissue growth factor OS=Bos taurus GN=CTGF PE=2 SV=2;>tr|I0BWK3|I0BWK3_BUBBU Connective tissue growth factor OS=Bubalus bubalis GN=CTGF PE=2 SV	6	11	11	11	42.7	37.966	1.8e-147	55720000	635860000	161610000	2.84397e+08	31454000	31304000		31379000	0.110335	0.352146
Q2YDD7;W5P0C5	>tr|Q2YDD7|Q2YDD7_BOVIN Galectin OS=Bos taurus GN=LGALS8 PE=2 SV=1;>tr|W5P0C5|W5P0C5_SHEEP Galectin OS=Ovis aries GN=LGALS8 PE=4 SV=1	2	2	2	2	5	40.127	0.00058147	6520900	6034200	5935400	6163500	6699500	6255800		6477650	1.05097	0.352586
F1MT41;L8I5V9	>tr|F1MT41|F1MT41_BOVIN Uncharacterized protein OS=Bos taurus GN=PTGFRN PE=4 SV=1;>tr|L8I5V9|L8I5V9_9CETA Prostaglandin F2 receptor negative regulator (Fragment) OS=Bos mutus GN=M91_20788 PE=4 SV=1	2	22	22	5	26	98.895	1.79e-170	593360000	413790000	728130000	5.78427e+08	592570000	734980000	730350000	6.85967e+08	1.18592	0.352615
Q5E936	>sp|Q5E936|TXD12_BOVIN Thioredoxin domain-containing protein 12 OS=Bos taurus GN=TXNDC12 PE=2 SV=1	1	2	2	2	10.5	19.222	1.18e-05	12693000	9278700	26100000	16023900	8423500	9070400		8746950	0.545869	0.352698
W5Q4S3;P39872;B1H0W8;L8IC36;Q862D2;L8J2C0;M5FKG6;Q3SZ10;W5Q5Q2;F1N578;F6K449;A1XEC9;W5P2J5;Q9BDY6	>tr|W5Q4S3|W5Q4S3_SHEEP Uncharacterized protein OS=Ovis aries GN=RPL3 PE=3 SV=1;>sp|P39872|RL3_BOVIN 60S ribosomal protein L3 OS=Bos taurus GN=RPL3 PE=2 SV=2;>tr|B1H0W8|B1H0W8_BOVIN Ribosomal protein L3 OS=Bos taurus GN=Rpl3 PE=2 SV=1;>tr|L8IC36|L8IC36_9CE	14	16	16	16	40	46.051	2.43e-152	795080000	691480000	352840000	6.13133e+08	1043300000	1079000000	468630000	8.63643e+08	1.40857	0.353068
A5PK55;F6QTA8;W5PEP0;L8J5A5;W5QD96;A6QLQ6;F1MC75;L8HQX5	>tr|A5PK55|A5PK55_BOVIN PARVA protein OS=Bos taurus GN=PARVA PE=2 SV=1;>tr|F6QTA8|F6QTA8_BOVIN Uncharacterized protein OS=Bos taurus GN=PARVA PE=4 SV=1;>tr|W5PEP0|W5PEP0_SHEEP Uncharacterized protein OS=Ovis aries GN=PARVA PE=4 SV=1;>tr|L8J5A5|L8J5A5_9CETA	8	7	7	7	23.1	42.257	1.52e-79	152810000	177760000	153890000	1.61487e+08	269920000	207960000	133320000	2.03733e+08	1.26161	0.353877
L8IFM9	>tr|L8IFM9|L8IFM9_9CETA Keratin, type I cytoskeletal 42 OS=Bos mutus GN=M91_17166 PE=3 SV=1	1	11	2	0	22.2	51.222	5.76e-48	32748000	19050000	49652000	3.38167e+07	14381000	64010000	257920000	1.12104e+08	3.31504	0.354509
L8IXT8;Q2HJ86;W5QFL1	>tr|L8IXT8|L8IXT8_9CETA Tubulin alpha chain (Fragment) OS=Bos mutus GN=M91_13956 PE=3 SV=1;>sp|Q2HJ86|TBA1D_BOVIN Tubulin alpha-1D chain OS=Bos taurus GN=TUBA1D PE=1 SV=1;>tr|W5QFL1|W5QFL1_SHEEP Tubulin alpha chain OS=Ovis aries GN=LOC101116286 PE=3 SV=1	3	19	19	1	56.5	50.41	0	5627200000	4108000000	2648000000	4.12773e+09	3933800000	3248100000	1936800000	3.03957e+09	0.736377	0.35474
P61157;L8IEV6;W5PQ98;F1N049;F1N6J8;L8HVE6;W5P7I1;W5P7H8	>sp|P61157|ARP3_BOVIN Actin-related protein 3 OS=Bos taurus GN=ACTR3 PE=1 SV=3;>tr|L8IEV6|L8IEV6_9CETA Actin-related protein 3 (Fragment) OS=Bos mutus GN=M91_18758 PE=3 SV=1;>tr|W5PQ98|W5PQ98_SHEEP Uncharacterized protein OS=Ovis aries GN=ACTR3 PE=3 SV=1;>	8	20	20	20	65.8	47.371	0	610130000	601290000	515550000	5.75657e+08	1136500000	690770000	499090000	7.75453e+08	1.34708	0.355045
F1N5N2;L8ITJ5;Q32KL5;W5PPA8	>tr|F1N5N2|F1N5N2_BOVIN ER membrane protein complex subunit 8 OS=Bos taurus GN=EMC8 PE=4 SV=1;>tr|L8ITJ5|L8ITJ5_9CETA Neighbor of COX4 OS=Bos mutus GN=M91_08314 PE=4 SV=1;>sp|Q32KL5|EMC8_BOVIN ER membrane protein complex subunit 8 OS=Bos taurus GN=EMC8 PE=	4	5	5	5	28.6	23.776	8.48e-36	28512000	17162000	36449000	2.73743e+07	14506000	21805000	25553000	2.06213e+07	0.753309	0.355436
L8J498;Q1RMI2	>tr|L8J498|L8J498_9CETA Rho-related GTP-binding protein RhoG OS=Bos mutus GN=M91_07829 PE=4 SV=1;>tr|Q1RMI2|Q1RMI2_BOVIN Ras homolog gene family, member G (Rho G) OS=Bos taurus GN=RHOG PE=1 SV=1	2	9	9	8	63.4	21.28	2.49e-106	226710000	252080000	268260000	2.49017e+08	285480000	404750000	225760000	305330000	1.22614	0.35579
A0A088Q0F1;A8DR93;Q76LV2;A0A088QFM6;A9P323;L8I2H5;Q8HZJ7;A7E3E1;Q3T007;Q7M2S4;Q7M2S3	>tr|A0A088Q0F1|A0A088Q0F1_9CETA Heat shock protein 90kDa alpha OS=Bos taurus x Bos grunniens PE=2 SV=1;>tr|A8DR93|A8DR93_SHEEP Heat shock protein alpha OS=Ovis aries GN=HSPCA PE=3 SV=1;>sp|Q76LV2|HS90A_BOVIN Heat shock protein HSP 90-alpha OS=Bos taurus GN	11	26	19	19	36.4	84.741	1.04e-298	704810000	846290000	454250000	668450000	718390000	480430000	260000000	4.86273e+08	0.727464	0.356878
W5PMD1;L8I400;E1BEI2	>tr|W5PMD1|W5PMD1_SHEEP Uncharacterized protein OS=Ovis aries GN=SPCS2 PE=4 SV=1;>tr|L8I400|L8I400_9CETA Signal peptidase complex subunit 2 OS=Bos mutus GN=M91_10002 PE=4 SV=1;>tr|E1BEI2|E1BEI2_BOVIN Uncharacterized protein OS=Bos taurus GN=SPCS2 PE=1 SV=1	3	8	8	8	39.6	28.441	1.29e-106	129330000	76769000	183520000	129873000	46527000	73520000	140070000	8.67057e+07	0.667619	0.357013
W5NZR9;A4FUZ3;Q5E9D7;L8J022;B2VQ18;Q9TS79	>tr|W5NZR9|W5NZR9_SHEEP Uncharacterized protein OS=Ovis aries GN=PSMC1 PE=3 SV=1;>tr|A4FUZ3|A4FUZ3_BOVIN Proteasome (Prosome, macropain) 26S subunit, ATPase, 1 OS=Bos taurus GN=PSMC1 PE=1 SV=1;>tr|Q5E9D7|Q5E9D7_BOVIN Proteasome 26S ATPase subunit 1 OS=Bos	6	7	7	7	20.3	50.197	1.4e-38	20788000	32380000	11485000	21551000	11042000	14844000		12943000	0.600575	0.357152
L8IW83;E1BKX1;W5Q1S8	>tr|L8IW83|L8IW83_9CETA Protein KIAA1199 OS=Bos mutus GN=M91_03831 PE=4 SV=1;>tr|E1BKX1|E1BKX1_BOVIN Uncharacterized protein OS=Bos taurus GN=CEMIP PE=4 SV=1;>tr|W5Q1S8|W5Q1S8_SHEEP Uncharacterized protein OS=Ovis aries GN=CEMIP PE=4 SV=1	3	24	24	24	22.4	153.29	1.19e-95	82050000	796490000	195290000	3.57943e+08	34277000	60450000		47363500	0.132321	0.357508
F1MX04	>tr|F1MX04|F1MX04_BOVIN Uncharacterized protein OS=Bos taurus GN=EIF4G1 PE=1 SV=2	1	26	1	0	18.3	178.59	5.52e-254	14625000	21769000		18197000	39591000	20724000		30157500	1.65728	0.357513
Q4TU70;P01971;P21379;W5PMR1;C6ZP43;C6ZP44;C6ZP47;C6ZP48;C6ZP49;C6ZP52;P0CH25;P0CH26;P68239;P68240;Q28743;Q28744;Q28745;F6MFG2;Q0ZA50;Q9TSN8;Q9XSK1	>tr|Q4TU70|Q4TU70_9CETA Alpha hemoglobin chain OS=Cervus canadensis canadensis PE=3 SV=1;>sp|P01971|HBA_ALCAA Hemoglobin subunit alpha OS=Alces alces alces GN=HBA PE=1 SV=2;>sp|P21379|HBA_RANTA Hemoglobin subunit alpha OS=Rangifer tarandus GN=HBA PE=1 SV=1	21	7	7	3	62	15.243	1.17e-180	207920000	808260000	337390000	451190000	406710000	1141000000	681910000	7.43207e+08	1.64721	0.35789
F1MTY9;L8IZX4;Q3T0J4	>tr|F1MTY9|F1MTY9_BOVIN Heme oxygenase (Decycling) 2 OS=Bos taurus GN=HMOX2 PE=1 SV=2;>tr|L8IZX4|L8IZX4_9CETA Heme oxygenase 2 OS=Bos mutus GN=M91_05069 PE=4 SV=1;>tr|Q3T0J4|Q3T0J4_BOVIN Heme oxygenase (Decycling) 2 OS=Bos taurus GN=HMOX2 PE=2 SV=1	3	5	5	2	20.4	37.555	3.39e-67	57916000	68148000	34632000	5.35653e+07	26799000	41485000	53368000	4.05507e+07	0.757032	0.35814
W5PCN2	>tr|W5PCN2|W5PCN2_SHEEP Annexin OS=Ovis aries GN=ANXA7 PE=3 SV=1	1	11	11	3	25.7	50.276	7.34e-60	195470000	69523000	60063000	108352000	73821000	72063000	38862000	61582000	0.568351	0.358311
A0A097KZM6;A0A0C5PT52;A0A0D6A083;A0A0H3V364;A0A0N6W910;A0A172ITF9;A0A1B3J106;A0A1B3J159;A0A1D8GXY3;A0A1D8I2C6;A0A1D8I2G7;A0A1D8X788;A0A1L2EE30;A0A1L2IW47;A0A2W1;A0MSY6;A1YKC7;A4ZXV5;B1P0Q4;B9ZUP8;C3TVT5;D3KCK9;D3KCM2;D5MBI9;E3VRD7;E3VRF0;F8V2P0;G8DNT6;G9B0W6;H6QVT0;H6QVU3;H6QVV6;H6QX67;H6U9E8;H6U9K0;H6U9Q2;H6U9R5;H6U9T0;H6U9U1;H6UAP0;H6UAS9;H6UBP1;H6UBQ4;H6UBV6;H6UC73;H6UC99;H6UCZ6;H6UD87;H6UDA0;…	>tr|A0A097KZM6|A0A097KZM6_9CETA Cytochrome c oxidase subunit 2 OS=Bos mutus GN=COX2 PE=3 SV=1;>tr|A0A0C5PT52|A0A0C5PT52_ALCAC Cytochrome c oxidase subunit 2 OS=Alces alces cameloides GN=COX2 PE=3 SV=1;>tr|A0A0D6A083|A0A0D6A083_BOSJA Cytochrome c oxidase su	347	4	4	4	20.7	26.005	2.06e-48	62250000		150410000	106330000	21534000	45812000	103890000	5.70787e+07	0.536807	0.358705
O02811;L8IFG8;A0A140T888;Q28925	>sp|O02811|PI4KA_BOVIN Phosphatidylinositol 4-kinase alpha OS=Bos taurus GN=PI4KA PE=2 SV=2;>tr|L8IFG8|L8IFG8_9CETA Phosphatidylinositol 4-kinase alpha (Fragment) OS=Bos mutus GN=M91_21069 PE=3 SV=1;>tr|A0A140T888|A0A140T888_BOVIN Phosphatidylinositol 4-ki	4	23	23	12	14.1	235.15	1.56e-135	136320000	79852000	114250000	1.10141e+08	100660000	136460000	183030000	140050000	1.27156	0.360027
Q2KJ53;L8IYS9;W5Q0W3	>sp|Q2KJ53|IMPA3_BOVIN Inositol monophosphatase 3 OS=Bos taurus GN=IMPAD1 PE=2 SV=1;>tr|L8IYS9|L8IYS9_9CETA Inositol monophosphatase 3 (Fragment) OS=Bos mutus GN=M91_19581 PE=4 SV=1;>tr|W5Q0W3|W5Q0W3_SHEEP Uncharacterized protein OS=Ovis aries GN=IMPAD1 PE	3	3	3	3	13.5	38.923	2.77e-16	9282900		31486000	20384450	5174900	9073200		7124050	0.349485	0.360471
L8ICH6;W5Q2Y9;A0A096ZGS0;Q9N0T5;W5Q2Y8	>tr|L8ICH6|L8ICH6_9CETA Eukaryotic translation initiation factor 4E (Fragment) OS=Bos mutus GN=M91_09091 PE=3 SV=1;>tr|W5Q2Y9|W5Q2Y9_SHEEP Uncharacterized protein OS=Ovis aries GN=EIF4E PE=3 SV=1;>tr|A0A096ZGS0|A0A096ZGS0_BUBBU Eukaryotic translation initi	5	3	3	3	14.4	27.508	2.07e-08	9944000	14393000	8766500	11034500	57211000	14686000	8736200	2.68777e+07	2.43579	0.36059
Q08DM8;W5PV21;L8IXA7	>sp|Q08DM8|TSN_BOVIN Translin OS=Bos taurus GN=TSN PE=2 SV=1;>tr|W5PV21|W5PV21_SHEEP Uncharacterized protein OS=Ovis aries GN=TSN PE=4 SV=1;>tr|L8IXA7|L8IXA7_9CETA Translin OS=Bos mutus GN=M91_17228 PE=4 SV=1	3	4	4	4	27.6	26.169	4.14e-58		15232000	18125000	16678500	36733000	18420000		27576500	1.65342	0.360746
Q3ZBH0;L8IB99;L8IGW7	>sp|Q3ZBH0|TCPB_BOVIN T-complex protein 1 subunit beta OS=Bos taurus GN=CCT2 PE=1 SV=3;>tr|L8IB99|L8IB99_9CETA T-complex protein 1 subunit beta (Fragment) OS=Bos mutus GN=M91_18919 PE=3 SV=1	3	24	1	1	59.4	57.475	0	6852500	38227000		22539750	16676000	6915900	2426900	8.67293e+06	0.384784	0.360901
A7MAZ5;L8IQN4;A5PK20;W5NS65;G3N131;L8IQQ1;L8IQN8;W5QFQ9	>sp|A7MAZ5|H13_BOVIN Histone H1.3 OS=Bos taurus GN=HIST1H1D PE=1 SV=1;>tr|L8IQN4|L8IQN4_9CETA Uncharacterized protein OS=Bos mutus GN=M91_11346 PE=3 SV=1;>tr|A5PK20|A5PK20_BOVIN HIST1H1E protein OS=Bos taurus GN=HIST1H1E PE=2 SV=1;>tr|W5NS65|W5NS65_SHEEP U	8	6	1	1	30.3	22.153	8.28e-16	34843000	11102000		22972500		8758500	9313500	9036000	0.39334	0.361354
W5NW35	>tr|W5NW35|W5NW35_SHEEP Uncharacterized protein OS=Ovis aries GN=MYOF PE=4 SV=1	1	91	13	13	53	233.41	0	1285000000	700550000	956900000	9.80817e+08	389420000	801240000	993760000	728140000	0.742381	0.361922
L8IB26;W5NUE5;A7E3U5	>tr|L8IB26|L8IB26_9CETA Putative sodium-coupled neutral amino acid transporter 7 (Fragment) OS=Bos mutus GN=M91_00080 PE=4 SV=1;>tr|W5NUE5|W5NUE5_SHEEP Uncharacterized protein OS=Ovis aries GN=SLC38A7 PE=4 SV=1;>sp|A7E3U5|S38A7_BOVIN Putative sodium-couple	3	3	3	3	7.1	50.038	4.5e-07	8764000		13097000	10930500	12382000		24704000	18543000	1.69645	0.363974
Q0P5M9;W5PZ89	>sp|Q0P5M9|MFS10_BOVIN Major facilitator superfamily domain-containing protein 10 OS=Bos taurus GN=MFSD10 PE=2 SV=1	2	3	3	3	8.1	48.143	3.78e-09	24367000	15861000	34543000	2.49237e+07	8165600	14214000	27962000	1.67805e+07	0.673277	0.364494
L8I2H6;H7BWW0;Q58CZ1;F1MK51;W5PR73	>tr|L8I2H6|L8I2H6_9CETA Coronin OS=Bos mutus GN=M91_14033 PE=3 SV=1;>tr|H7BWW0|H7BWW0_BOVIN Coronin OS=Bos taurus GN=CORO1B PE=1 SV=1;>tr|Q58CZ1|Q58CZ1_BOVIN Coronin OS=Bos taurus GN=CORO1B PE=2 SV=1;>tr|F1MK51|F1MK51_BOVIN Coronin OS=Bos taurus GN=CORO1B	5	4	4	4	9.4	54.283	3.99e-13	17304000	18777000		18040500	57568000	21050000		39309000	2.17893	0.364543
A7MB70;W5Q605;L8IVA1	>sp|A7MB70|SEM3C_BOVIN Semaphorin-3C OS=Bos taurus GN=SEMA3C PE=2 SV=1;>tr|W5Q605|W5Q605_SHEEP Uncharacterized protein OS=Ovis aries GN=SEMA3C PE=3 SV=1;>tr|L8IVA1|L8IVA1_9CETA Semaphorin-3C (Fragment) OS=Bos mutus GN=M91_06784 PE=4 SV=1	3	8	8	8	15	85.236	1.62e-32	18898000	158030000	75760000	8.42293e+07	30872000	26422000		28647000	0.340107	0.364793
A0A140T856;W5PFV7;Q27954;L8I566	>tr|A0A140T856|A0A140T856_BOVIN Coatomer subunit alpha OS=Bos taurus GN=COPA PE=4 SV=1;>tr|W5PFV7|W5PFV7_SHEEP Coatomer subunit alpha OS=Ovis aries GN=COPA PE=4 SV=1;>sp|Q27954|COPA_BOVIN Coatomer subunit alpha OS=Bos taurus GN=COPA PE=1 SV=1;>tr|L8I566|L8	4	31	31	31	32.7	138.34	1.53e-175	343870000	479270000	256980000	360040000	327920000	327420000	169320000	2.74887e+08	0.763489	0.36539
Q5E9Y9;W5PIB4;L8I8I8;Q58CU9;G1K159	>sp|Q5E9Y9|NDK7_BOVIN Nucleoside diphosphate kinase 7 OS=Bos taurus GN=NME7 PE=2 SV=1;>tr|W5PIB4|W5PIB4_SHEEP Uncharacterized protein OS=Ovis aries GN=NME7 PE=3 SV=1;>tr|L8I8I8|L8I8I8_9CETA Nucleoside diphosphate kinase 7 (Fragment) OS=Bos mutus GN=M91_037	5	1	1	1	2.7	42.599	0.002704	127230000	114470000	161780000	1.34493e+08	91019000	133180000	121430000	1.1521e+08	0.85662	0.365455
F1MJV0;Q29466;W5NV03;A7Z016;F1MH43;W5NV06;E1BGJ7;L8HQD0;W5PLB5	>tr|F1MJV0|F1MJV0_BOVIN V-type proton ATPase subunit a OS=Bos taurus GN=ATP6V0A1 PE=1 SV=1;>sp|Q29466|VPP1_BOVIN V-type proton ATPase 116 kDa subunit a isoform 1 OS=Bos taurus GN=ATP6V0A1 PE=2 SV=1;>tr|W5NV03|W5NV03_SHEEP V-type proton ATPase subunit a OS=	9	8	7	7	11.8	96.329	9.57e-26	56298000	78655000	138070000	9.10077e+07	57557000	55520000	81182000	64753000	0.711511	0.365611
W5Q3X4;G8JEB0;P35604;W5Q3X7;L8I8E4	>tr|W5Q3X4|W5Q3X4_SHEEP Uncharacterized protein OS=Ovis aries GN=COPZ1 PE=4 SV=1;>tr|G8JEB0|G8JEB0_CAPHI Coatomer protein complex subunit zeta OS=Capra hircus PE=2 SV=1;>sp|P35604|COPZ1_BOVIN Coatomer subunit zeta-1 OS=Bos taurus GN=COPZ1 PE=1 SV=2;>tr|W5Q	5	2	2	2	13	21.622	7.49e-11	7250400	17415000		12332700	20215000	16866000		18540500	1.50336	0.365772
W5P369	>tr|W5P369|W5P369_SHEEP Uncharacterized protein OS=Ovis aries GN=AP2A2 PE=4 SV=1	1	23	1	1	27.1	106.49	1.43e-126	17566000	18555000	28050000	2.13903e+07	27031000	23258000	24598000	2.49623e+07	1.16699	0.367577
F1MJV5;Q0IIF7;W5PH25;L8ID61	>tr|F1MJV5|F1MJV5_BOVIN Ubiquitin carboxyl-terminal hydrolase 14 OS=Bos taurus GN=USP14 PE=3 SV=2;>sp|Q0IIF7|UBP14_BOVIN Ubiquitin carboxyl-terminal hydrolase 14 OS=Bos taurus GN=USP14 PE=2 SV=3;>tr|W5PH25|W5PH25_SHEEP Uncharacterized protein OS=Ovis aries	4	2	2	2	4.9	55.756	5e-06	9984100	8793800	10758000	9845300	8336200	9532700		8934450	0.907484	0.368133
F1N3I4	>tr|F1N3I4|F1N3I4_BOVIN Uncharacterized protein OS=Bos taurus GN=MYOF PE=1 SV=2	1	92	92	14	54.6	234.66	0	9440200000	4549800000	6044000000	6678000000	2264600000	5045100000	6780100000	4696600000	0.703294	0.368197
F1MJK3;F1MI18	>tr|F1MJK3|F1MJK3_BOVIN Uncharacterized protein OS=Bos taurus PE=4 SV=2;>tr|F1MI18|F1MI18_BOVIN Uncharacterized protein OS=Bos taurus PE=4 SV=2	2	37	36	20	29.8	165.61	0	463140000	3468200000	1447300000	1792880000	1514600000	606160000	368640000	829800000	0.462831	0.368465
A5D7R9;L8J505;W5QFK5	>tr|A5D7R9|A5D7R9_BOVIN NRAS protein OS=Bos taurus GN=NRAS PE=2 SV=1;>tr|L8J505|L8J505_9CETA GTPase NRas OS=Bos mutus GN=M91_03169 PE=4 SV=1;>tr|W5QFK5|W5QFK5_SHEEP Uncharacterized protein OS=Ovis aries GN=NRAS PE=4 SV=1	3	8	8	1	58.2	21.229	3.04e-268	264380000	187640000	217700000	223240000	251520000	232390000	257350000	2.47087e+08	1.10682	0.368779
A3KN04;L8J5Q6;A6QL95;F1MJ36;L8IH13;W5PEC5	>tr|A3KN04|A3KN04_BOVIN Dolichyl-diphosphooligosaccharide--protein glycosyltransferase subunit 1 OS=Bos taurus GN=RPN1 PE=1 SV=1;>tr|L8J5Q6|L8J5Q6_9CETA Dolichyl-diphosphooligosaccharide--protein glycosyltransferase subunit 1 OS=Bos mutus GN=M91_21588 PE=3	6	20	20	7	34.3	68.351	0	1398200000	871520000	1653900000	1.30787e+09	405600000	717480000	1551300000	891460000	0.68161	0.369653
F1MDC1;A0JNP4	>tr|F1MDC1|F1MDC1_BOVIN Uncharacterized protein OS=Bos taurus PE=1 SV=2	2	27	27	7	21.2	166.91	3.64e-233	302300000	845430000	426290000	5.24673e+08	213540000	375250000	446890000	3.45227e+08	0.657984	0.370976
L8I011;Q5E983;W5QB95;H9TKZ5;Q2VYC3;W5QDX6	>tr|L8I011|L8I011_9CETA Elongation factor 1-beta OS=Bos mutus GN=M91_06543 PE=3 SV=1;>sp|Q5E983|EF1B_BOVIN Elongation factor 1-beta OS=Bos taurus GN=EEF1B PE=2 SV=3;>tr|W5QB95|W5QB95_SHEEP Uncharacterized protein OS=Ovis aries GN=EEF1B2 PE=3 SV=1;>tr|H9TKZ	6	9	7	7	52.9	24.804	0	205520000	328870000	115040000	2.16477e+08	650730000	313290000	160860000	374960000	1.7321	0.371078
L8HXP8;Q5E956;W5P5W9	>tr|L8HXP8|L8HXP8_9CETA Triosephosphate isomerase OS=Bos mutus GN=M91_17650 PE=3 SV=1;>sp|Q5E956|TPIS_BOVIN Triosephosphate isomerase OS=Bos taurus GN=TPI1 PE=2 SV=3;>tr|W5P5W9|W5P5W9_SHEEP Triosephosphate isomerase OS=Ovis aries GN=TPI1 PE=3 SV=1	3	10	10	10	51	30.575	4.31e-73	194560000	213580000	93729000	1.6729e+08	124570000	162920000	81906000	123132000	0.736041	0.371743
W5P5W6;F1MS38;Q3SYX0	>tr|W5P5W6|W5P5W6_SHEEP Uncharacterized protein OS=Ovis aries GN=NDRG1 PE=4 SV=1;>tr|F1MS38|F1MS38_BOVIN Protein NDRG1 OS=Bos taurus GN=NDRG1 PE=4 SV=1;>sp|Q3SYX0|NDRG1_BOVIN Protein NDRG1 OS=Bos taurus GN=NDRG1 PE=2 SV=1	3	3	3	3	10.6	44.427	3.08e-11	23957000	25719000		24838000	85942000	44679000	20948000	50523000	2.0341	0.371863
W5NRL0;P10895;L8HLI0	>tr|W5NRL0|W5NRL0_SHEEP Phosphoinositide phospholipase C OS=Ovis aries GN=PLCD1 PE=4 SV=1;>sp|P10895|PLCD1_BOVIN 1-phosphatidylinositol 4,5-bisphosphate phosphodiesterase delta-1 OS=Bos taurus GN=PLCD1 PE=2 SV=2;>tr|L8HLI0|L8HLI0_9CETA Phosphoinositide pho	3	6	6	6	9.4	88.032	1.71e-40	11954000	21574000	16191000	16573000	20799000	19903000		20351000	1.22796	0.372102
W5Q160	>tr|W5Q160|W5Q160_SHEEP Uncharacterized protein OS=Ovis aries GN=KRT10 PE=3 SV=1	1	18	16	2	33.2	57.172	2.19e-140	2686000000	1227200000	2708000000	2.20707e+09	982450000	3754500000	10938000000	5.22498e+09	2.36739	0.372298
Q3SZG7;F1MK30;Q56JZ1;W5P1C7;W5PNS4	>tr|Q3SZG7|Q3SZG7_BOVIN 60S ribosomal protein L13 OS=Bos taurus GN=RPL13 PE=2 SV=1;>tr|F1MK30|F1MK30_BOVIN 60S ribosomal protein L13 OS=Bos taurus GN=RPL13 PE=3 SV=1;>sp|Q56JZ1|RL13_BOVIN 60S ribosomal protein L13 OS=Bos taurus GN=RPL13 PE=2 SV=3	5	7	7	7	23.1	33.801	3.56e-88	194340000	344920000	139740000	2.26333e+08	501910000	381000000	154100000	345670000	1.52726	0.37263
E1BM91	>tr|E1BM91|E1BM91_BOVIN Uncharacterized protein OS=Bos taurus GN=DSG3 PE=4 SV=1	1	1	1	1	1.3	106.84	0.01366	40043000	10975000	26920000	2.59793e+07		30020000	49027000	39523500	1.52134	0.372703
W5Q4E3;A7E3W7;Q0IIK5;L8IWN9	>tr|W5Q4E3|W5Q4E3_SHEEP Uncharacterized protein OS=Ovis aries GN=DDX1 PE=4 SV=1;>tr|A7E3W7|A7E3W7_BOVIN DEAD (Asp-Glu-Ala-Asp) box polypeptide 1 OS=Bos taurus GN=DDX1 PE=2 SV=1;>sp|Q0IIK5|DDX1_BOVIN ATP-dependent RNA helicase DDX1 OS=Bos taurus GN=DDX1 PE=	4	13	13	13	20.8	82.003	6e-93	87634000	86337000	16115000	63362000	216530000	85518000	53630000	1.18559e+08	1.87114	0.373602
Q1RMW9;W5PRW3;W5QI49;A6H7F6;L8ILG9;W5QH28;W5QH29	>tr|Q1RMW9|Q1RMW9_BOVIN Golgi phosphoprotein 3 (Coat-protein) OS=Bos taurus GN=GOLPH3 PE=2 SV=1;>tr|W5PRW3|W5PRW3_SHEEP Uncharacterized protein OS=Ovis aries GN=GOLPH3 PE=4 SV=1;>tr|W5QI49|W5QI49_SHEEP Uncharacterized protein OS=Ovis aries GN=GOLPH3L PE=4	7	1	1	1	4.4	33.725	1.76e-11		6534200	5150300	5842250	9032700	6216700		7624700	1.3051	0.373697
Q5E9A3;W5QE14;L8IMZ8;E1B8C6;Q0VCU0	>sp|Q5E9A3|PCBP1_BOVIN Poly(rC)-binding protein 1 OS=Bos taurus GN=PCBP1 PE=2 SV=1;>tr|W5QE14|W5QE14_SHEEP Uncharacterized protein OS=Ovis aries GN=PCBP1 PE=4 SV=1;>tr|L8IMZ8|L8IMZ8_9CETA Poly(RC)-binding protein 1 OS=Bos mutus GN=M91_09606 PE=4 SV=1	5	12	12	7	46.1	37.497	8.02e-116	146570000	211630000	96243000	151481000	620200000	225620000	93660000	313160000	2.06732	0.37386
W5PYK0;Q3SZ54;L8IKI3;Q30B89;L8HSE7;L8HSX5;Q9XT93	>tr|W5PYK0|W5PYK0_SHEEP Uncharacterized protein OS=Ovis aries GN=EIF4A1 PE=3 SV=1;>sp|Q3SZ54|IF4A1_BOVIN Eukaryotic initiation factor 4A-I OS=Bos taurus GN=EIF4A1 PE=2 SV=1;>tr|L8IKI3|L8IKI3_9CETA Eukaryotic initiation factor 4A-I (Fragment) OS=Bos mutus G	7	18	18	9	51.8	46.282	0	337900000	562350000	344390000	414880000	1143400000	563190000	310300000	6.72297e+08	1.62046	0.373872
E1BEK9;W5PM50;L8IEC3	>tr|E1BEK9|E1BEK9_BOVIN Uncharacterized protein OS=Bos taurus GN=UPF1 PE=4 SV=2;>tr|W5PM50|W5PM50_SHEEP Uncharacterized protein OS=Ovis aries GN=UPF1 PE=4 SV=1;>tr|L8IEC3|L8IEC3_9CETA Regulator of nonsense transcripts 1 OS=Bos mutus GN=M91_10171 PE=4 SV=1	3	10	10	10	9.7	124.28	8.38e-24	24427000	11372000		17899500	38664000	16199000	29085000	2.79827e+07	1.56332	0.375387
A4FV94;M0QVY0;W5Q6B8;L8HW76;F1MUY2;L8HYK0;F1MKE7;L8HWA5	>tr|A4FV94|A4FV94_BOVIN KRT6A protein OS=Bos taurus GN=KRT6A PE=2 SV=1;>tr|M0QVY0|M0QVY0_BOVIN Uncharacterized protein OS=Bos taurus GN=KRT6C PE=3 SV=1;>tr|W5Q6B8|W5Q6B8_SHEEP Uncharacterized protein OS=Ovis aries GN=LOC101112304 PE=3 SV=1;>tr|L8HW76|L8HW7	8	21	8	0	26.1	60.819	0	856620000	483490000	903180000	7.47763e+08	390460000	1157700000	4041400000	1.86319e+09	2.49168	0.375393
W5Q0L1	>tr|W5Q0L1|W5Q0L1_SHEEP Uncharacterized protein OS=Ovis aries GN=EEF1G PE=4 SV=1	1	17	17	2	34.6	63.42	3.26e-204	281740000	422320000	285390000	3.29817e+08	1016800000	540330000	174030000	5.77053e+08	1.74962	0.375789
F1N1R8;W5PCD9;L8I887	>tr|F1N1R8|F1N1R8_BOVIN Uncharacterized protein OS=Bos taurus GN=EML4 PE=4 SV=2;>tr|W5PCD9|W5PCD9_SHEEP Uncharacterized protein OS=Ovis aries GN=EML4 PE=4 SV=1;>tr|L8I887|L8I887_9CETA Echinoderm microtubule-associated protein-like 4 (Fragment) OS=Bos mutus	3	3	3	3	3.6	110.36	1.03e-09	8524700	7915700	10153000	8.86447e+06	13753000	8448500		11100750	1.25228	0.376022
F1MWU9	>tr|F1MWU9|F1MWU9_BOVIN Uncharacterized protein OS=Bos taurus GN=HSPA6 PE=1 SV=2	1	6	2	1	10.7	70.955	4.8e-73	565120000	484360000	748790000	5.99423e+08	389610000	437860000	642440000	489970000	0.817402	0.376516
W5Q8V5;E1BL52;Q2HJI9;L8HTI0;L8IX17	>tr|W5Q8V5|W5Q8V5_SHEEP Uncharacterized protein OS=Ovis aries GN=RBX1 PE=4 SV=1;>tr|E1BL52|E1BL52_BOVIN Uncharacterized protein OS=Bos taurus GN=LOC780968 PE=4 SV=1;>tr|Q2HJI9|Q2HJI9_BOVIN Ring-box 1 OS=Bos taurus GN=RBX1 PE=2 SV=1;>tr|L8HTI0|L8HTI0_9CETA	5	2	2	2	23.2	12.705	2e-16	16933000	46756000		31844500	26201000	19133000	12007000	1.91137e+07	0.600219	0.377073
W5PZQ7;L8J2R5;Q32LM0;W5PZR0;F1N7B9	>tr|W5PZQ7|W5PZQ7_SHEEP Uncharacterized protein OS=Ovis aries GN=SH3GLB1 PE=4 SV=1;>tr|L8J2R5|L8J2R5_9CETA Endophilin-B1 OS=Bos mutus GN=M91_00756 PE=4 SV=1;>sp|Q32LM0|SHLB1_BOVIN Endophilin-B1 OS=Bos taurus GN=SH3GLB1 PE=2 SV=1;>tr|W5PZR0|W5PZR0_SHEEP Unc	5	7	7	6	17.7	45.139	3.33e-40	15788000	24569000		20178500	37053000	26072000	19898000	2.76743e+07	1.37148	0.377573
Q3T0D5;W5PMC5;L8I3C7;E1B8L7;L8IMN7;L8IJR1;W5Q7M2	>sp|Q3T0D5|RL30_BOVIN 60S ribosomal protein L30 OS=Bos taurus GN=RPL30 PE=3 SV=3;>tr|W5PMC5|W5PMC5_SHEEP Uncharacterized protein OS=Ovis aries GN=LOC101110546 PE=3 SV=1;>tr|L8I3C7|L8I3C7_9CETA Uncharacterized protein (Fragment) OS=Bos mutus GN=M91_00905 PE	7	7	7	7	66.1	12.784	6.25e-96	409020000	349710000	229870000	3.29533e+08	545520000	608760000	222710000	4.58997e+08	1.39287	0.377793
A6H732;L8I1R0;W5PGS5	>tr|A6H732|A6H732_BOVIN TMX4 protein OS=Bos taurus GN=TMX4 PE=2 SV=1;>tr|L8I1R0|L8I1R0_9CETA Thioredoxin-related transmembrane protein 4 (Fragment) OS=Bos mutus GN=M91_07396 PE=4 SV=1;>tr|W5PGS5|W5PGS5_SHEEP Uncharacterized protein OS=Ovis aries GN=TMX4 PE	3	2	2	2	6.6	38.883	1.19e-05	6725300	10028000	17877000	1.15434e+07		14957000	17094000	16025500	1.38828	0.377992
A0A1K0FUD3;P01966;P09423;P01968;P01967;C6ZP46;C6ZP50;P01969;P04237;L8J2H0;Q9TSN7;Q9TSN9;E1BAP8;F1MMI1;P13786;P01972	>tr|A0A1K0FUD3|A0A1K0FUD3_BOVIN Globin C1 OS=Bos taurus GN=GLNC1 PE=3 SV=1;>sp|P01966|HBA_BOVIN Hemoglobin subunit alpha OS=Bos taurus GN=HBA PE=1 SV=2;>sp|P09423|HBA_BISBO Hemoglobin subunit alpha-I/II OS=Bison bonasus PE=1 SV=2;>sp|P01968|HBA2_BOSMU Hemo	16	6	2	2	57	15.184	7.38e-114	172540000	771070000	236860000	393490000	220260000	43484000		131872000	0.335134	0.378149
L8HT20;P13620;W5PP37;B7P027;E1BNJ3	>tr|L8HT20|L8HT20_9CETA ATP synthase subunit d, mitochondrial OS=Bos mutus GN=M91_03309 PE=4 SV=1;>sp|P13620|ATP5H_BOVIN ATP synthase subunit d, mitochondrial OS=Bos taurus GN=ATP5H PE=1 SV=2;>tr|W5PP37|W5PP37_SHEEP Uncharacterized protein OS=Ovis aries GN	5	5	5	2	42.2	18.692	2.35e-19	24719000		39104000	31911500		15026000	27494000	21260000	0.666218	0.379471
W5PBR7;A6QL77	>tr|W5PBR7|W5PBR7_SHEEP Uncharacterized protein OS=Ovis aries GN=P4HA1 PE=4 SV=1;>tr|A6QL77|A6QL77_BOVIN Prolyl 4-hydroxylase subunit alpha-1 OS=Bos taurus GN=P4HA1 PE=2 SV=1	2	17	17	2	38.4	60.921	8.18e-150	482600000	278730000	429550000	396960000	141920000	192840000	488690000	2.74483e+08	0.691463	0.37977
E1BDF0;L8I2Z3;W5PUJ9	>tr|E1BDF0|E1BDF0_BOVIN Uncharacterized protein OS=Bos taurus GN=NEXN PE=4 SV=2;>tr|L8I2Z3|L8I2Z3_9CETA Nexilin (Fragment) OS=Bos mutus GN=M91_13285 PE=4 SV=1;>tr|W5PUJ9|W5PUJ9_SHEEP Uncharacterized protein OS=Ovis aries GN=NEXN PE=4 SV=1	3	8	8	8	12	80.877	2.7e-24	84836000	64871000	45633000	6.51133e+07	61291000	70290000	209640000	1.1374e+08	1.74681	0.380114
W5Q678	>tr|W5Q678|W5Q678_SHEEP Uncharacterized protein OS=Ovis aries GN=SEC24D PE=4 SV=1	1	11	1	1	14.6	115.12	3.91e-73		21278000	13440000	17359000	52955000	19798000		36376500	2.09554	0.380401
Q0P5F3;W5Q0E7;L8IU02;Q32LM6;W5Q0N9;L8J327;Q2KIB6;L8IKM9;W5PST5	>sp|Q0P5F3|LIN7C_BOVIN Protein lin-7 homolog C OS=Bos taurus GN=LIN7C PE=2 SV=1;>tr|W5Q0E7|W5Q0E7_SHEEP Uncharacterized protein OS=Ovis aries GN=LIN7C PE=4 SV=1;>tr|L8IU02|L8IU02_9CETA Protein lin-7-like protein C (Fragment) OS=Bos mutus GN=M91_05044 PE=4	9	8	8	8	44.2	21.834	2.63e-31	112280000	88282000	181410000	127324000	98739000	107000000	92876000	9.95383e+07	0.781772	0.380487
W5QIA8;F1MHM5;Q0III5;L8I0G2;Q29465	>tr|W5QIA8|W5QIA8_SHEEP Tyrosine--tRNA ligase OS=Ovis aries GN=YARS PE=3 SV=1;>tr|F1MHM5|F1MHM5_BOVIN Tyrosine--tRNA ligase OS=Bos taurus GN=YARS PE=3 SV=1;>tr|Q0III5|Q0III5_BOVIN Tyrosine--tRNA ligase OS=Bos taurus GN=YARS PE=2 SV=1;>tr|L8I0G2|L8I0G2_9CET	5	9	9	9	18.1	63.198	2.17e-45	45205000	150730000	61000000	85645000	76002000	44036000	32529000	5.08557e+07	0.593796	0.380644
Q148M6	>sp|Q148M6|MXRA8_BOVIN Matrix-remodeling-associated protein 8 OS=Bos taurus GN=MXRA8 PE=2 SV=1	1	6	6	1	13.4	52.033	9.55e-16	39964000	262270000	121070000	1.41101e+08	96334000	64168000	68899000	76467000	0.54193	0.381055
F1MQ47;L8IMN5;Q5E9L7;W5P5A7;W5P5B0	>tr|F1MQ47|F1MQ47_BOVIN Vacuolar protein sorting-associated protein 16 homolog OS=Bos taurus GN=VPS16 PE=4 SV=1;>tr|L8IMN5|L8IMN5_9CETA Vacuolar protein sorting-associated protein 16-like protein OS=Bos mutus GN=M91_18326 PE=4 SV=1;>sp|Q5E9L7|VPS16_BOVIN V	5	3	3	3	5.5	94.845	2.71e-08	13496000	16122000	23851000	17823000	9818700	15186000	17225000	1.40766e+07	0.789798	0.381442
W5Q289;W5Q292;F1N7J2;Q95ML6	>tr|W5Q289|W5Q289_SHEEP Calcium-transporting ATPase OS=Ovis aries GN=ATP2B1 PE=3 SV=1;>tr|W5Q292|W5Q292_SHEEP Calcium-transporting ATPase OS=Ovis aries GN=ATP2B1 PE=3 SV=1;>tr|F1N7J2|F1N7J2_BOVIN Calcium-transporting ATPase OS=Bos taurus GN=ATP2B1 PE=1 SV=	4	26	26	2	26.6	137.72	9.46e-257	511270000	346600000	477000000	4.44957e+08	423950000	528390000	585740000	5.12693e+08	1.15223	0.381757
L8HLP9;P13272;W5P2X9;G3MXD1;W5QEN6	>tr|L8HLP9|L8HLP9_9CETA Cytochrome b-c1 complex subunit Rieske, mitochondrial OS=Bos mutus GN=M91_16830 PE=4 SV=1;>sp|P13272|UCRI_BOVIN Cytochrome b-c1 complex subunit Rieske, mitochondrial OS=Bos taurus GN=UQCRFS1 PE=1 SV=3;>tr|W5P2X9|W5P2X9_SHEEP Cytochr	5	4	4	4	14.2	29.546	3.24e-07	28589000	16655000	41978000	29074000	54314000	32954000	30791000	39353000	1.35355	0.382242
P02081;G3N1Y3;G3MZ21;P02082;L8HMV9;W5QCZ9	>sp|P02081|HBBF_BOVIN Hemoglobin fetal subunit beta OS=Bos taurus PE=1 SV=1;>tr|G3N1Y3|G3N1Y3_BOVIN Uncharacterized protein OS=Bos taurus PE=3 SV=1;>tr|G3MZ21|G3MZ21_BOVIN Uncharacterized protein OS=Bos taurus PE=3 SV=1;>sp|P02082|HBBF_CAPHI Hemoglobin fet	6	9	9	3	73.1	15.859	2.63e-44	83136000	579350000	257090000	3.06525e+08	457700000	616850000	335050000	4.69867e+08	1.53288	0.382605
L8I3R4;Q28056;Q29RR2	>tr|L8I3R4|L8I3R4_9CETA Aspartyl/asparaginyl beta-hydroxylase OS=Bos mutus GN=M91_03278 PE=4 SV=1;>sp|Q28056|ASPH_BOVIN Aspartyl/asparaginyl beta-hydroxylase OS=Bos taurus GN=ASPH PE=1 SV=1	3	14	14	5	26.8	85.169	1.44e-92	272210000	168660000	404640000	2.81837e+08	82252000	128880000	332410000	1.81181e+08	0.642857	0.38284
A5D7B9;L8IWD3;W5NXK9;W5NXL1;Q862M3	>tr|A5D7B9|A5D7B9_BOVIN CASK protein OS=Bos taurus GN=CASK PE=2 SV=1;>tr|L8IWD3|L8IWD3_9CETA Peripheral plasma membrane protein CASK (Fragment) OS=Bos mutus GN=M91_12900 PE=4 SV=1;>tr|W5NXK9|W5NXK9_SHEEP Uncharacterized protein OS=Ovis aries GN=CASK PE=4 S	5	15	15	15	19.9	103.18	5.06e-68	103080000	54083000	115040000	9.07343e+07	98894000	96419000	155360000	116891000	1.28828	0.384327
E1BL45;W5Q2L9;L8ILW8	>tr|E1BL45|E1BL45_BOVIN Uncharacterized protein OS=Bos taurus GN=EHBP1L1 PE=4 SV=2;>tr|W5Q2L9|W5Q2L9_SHEEP Uncharacterized protein OS=Ovis aries GN=EHBP1L1 PE=4 SV=1;>tr|L8ILW8|L8ILW8_9CETA EH domain-binding protein 1-like protein 1 OS=Bos mutus GN=M91_159	3	3	3	3	2.5	153.77	8.64e-39	10021000		11055000	10538000	12598000	25096000	11276000	1.63233e+07	1.549	0.384653
A5D7F4;W5NQU0;L8HMH4;A5PKJ8;A6QNV3;A6QP10;L8HNP4	>tr|A5D7F4|A5D7F4_BOVIN PCDHGC3 protein OS=Bos taurus GN=PCDHGC3 PE=2 SV=1;>tr|W5NQU0|W5NQU0_SHEEP Uncharacterized protein OS=Ovis aries GN=PCDHGC5 PE=4 SV=1;>tr|L8HMH4|L8HMH4_9CETA Protocadherin gamma-C5 OS=Bos mutus GN=M91_17249 PE=4 SV=1;>tr|A5PKJ8|A5PK	7	4	4	4	5.8	101.34	3.58e-20	12297000	33551000	19714000	21854000	60246000	32153000	15492000	3.59637e+07	1.64563	0.384673
L8HXQ9;Q5E959;W5QHE9	>tr|L8HXQ9|L8HXQ9_9CETA Serine-threonine kinase receptor-associated protein OS=Bos mutus GN=M91_21457 PE=4 SV=1;>sp|Q5E959|STRAP_BOVIN Serine-threonine kinase receptor-associated protein OS=Bos taurus GN=STRAP PE=2 SV=1;>tr|W5QHE9|W5QHE9_SHEEP Uncharacteri	3	6	6	6	24.2	39.609	4.17e-46	20111000	18615000		19363000	68198000	21769000		44983500	2.32317	0.384974
L8I0M8;P62833;W5QED8	>tr|L8I0M8|L8I0M8_9CETA Ras-related protein Rap-1A OS=Bos mutus GN=M91_07485 PE=4 SV=1;>sp|P62833|RAP1A_BOVIN Ras-related protein Rap-1A OS=Bos taurus GN=RAP1A PE=1 SV=1;>tr|W5QED8|W5QED8_SHEEP Uncharacterized protein OS=Ovis aries GN=RAP1A PE=4 SV=1	3	9	3	3	49.5	20.987	2.4e-77	65746000	33729000	66915000	5.54633e+07	51864000	74075000	81552000	6.91637e+07	1.24702	0.385029
G5E6P8;W5NPZ7	>tr|G5E6P8|G5E6P8_BOVIN Uncharacterized protein OS=Bos taurus GN=C6H4orf3 PE=4 SV=1;>tr|W5NPZ7|W5NPZ7_SHEEP Uncharacterized protein OS=Ovis aries GN=C6H4orf3 PE=4 SV=1	2	2	2	2	27.9	7.9778	1.23e-05	5575800	4444000	2931100	4.31697e+06	33805000	3631100	4544000	1.39934e+07	3.24148	0.38539
L8IVU0;Q3T0U1;W5Q230	>tr|L8IVU0|L8IVU0_9CETA LDLR chaperone MESD OS=Bos mutus GN=M91_03830 PE=4 SV=1;>sp|Q3T0U1|MESD_BOVIN LDLR chaperone MESD OS=Bos taurus GN=MESDC2 PE=2 SV=1;>tr|W5Q230|W5Q230_SHEEP Uncharacterized protein OS=Ovis aries GN=MESDC2 PE=4 SV=1	3	5	5	5	25	25.96	1.71e-24	90828000	91591000	108030000	9.68163e+07	86160000	116640000	126970000	1.09923e+08	1.13538	0.385758
G1K1P8;L8IQT4;W5P5G6;Q32PA9;A6YLM7	>tr|G1K1P8|G1K1P8_BOVIN Peptidylprolyl isomerase OS=Bos taurus GN=FKBP2 PE=4 SV=2;>tr|L8IQT4|L8IQT4_9CETA Peptidylprolyl isomerase (Fragment) OS=Bos mutus GN=M91_13009 PE=4 SV=1;>tr|W5P5G6|W5P5G6_SHEEP Peptidylprolyl isomerase OS=Ovis aries GN=FKBP2 PE=4 S	5	1	1	1	7.4	17.705	0.0023036	16130000	16866000	12056000	1.50173e+07	15892000	12789000	9328300	1.26698e+07	0.843676	0.386021
B0JYM5;Q3SZI4;L8HYB5;W5Q0Q1;L8IG53;Q7M3I1	>tr|B0JYM5|B0JYM5_BOVIN Tyrosine 3-monooxygenase/tryptophan 5-monooxygenase activation protein, theta polypeptide OS=Bos taurus GN=YWHAQ PE=2 SV=1;>sp|Q3SZI4|1433T_BOVIN 14-3-3 protein theta OS=Bos taurus GN=YWHAQ PE=2 SV=1;>tr|L8HYB5|L8HYB5_9CETA 14-3-3 p	6	11	7	7	52.7	27.764	1.97e-149	251420000	314400000	185130000	2.50317e+08	270980000	200130000	96512000	1.89207e+08	0.755872	0.386453
W5PKH9;L8ID67;Q0V8G3	>tr|W5PKH9|W5PKH9_SHEEP Uncharacterized protein OS=Ovis aries GN=QPCTL PE=4 SV=1;>tr|L8ID67|L8ID67_9CETA Glutaminyl-peptide cyclotransferase-like protein OS=Bos mutus GN=M91_05738 PE=4 SV=1;>sp|Q0V8G3|QPCTL_BOVIN Glutaminyl-peptide cyclotransferase-like pr	3	3	3	3	10	44.428	5.2e-15	41941000	24767000	63772000	4.34933e+07		27845000	29686000	28765500	0.661377	0.387028
F1MC11;W5Q6L8;L8HP74;Q0PEU2;P05785;H9NAL6	>tr|F1MC11|F1MC11_BOVIN Keratin, type I cytoskeletal 14 OS=Bos taurus GN=KRT14 PE=1 SV=2;>tr|W5Q6L8|W5Q6L8_SHEEP Uncharacterized protein OS=Ovis aries GN=KRT14 PE=3 SV=1;>tr|L8HP74|L8HP74_9CETA Keratin, type I cytoskeletal 14 OS=Bos mutus GN=M91_06039 PE=3	6	21	20	6	41.9	51.91	1.11e-126	717400000	834460000	1428600000	9.93487e+08	556750000	1461200000	4234700000	2.08422e+09	2.09788	0.388389
L8HVY9	>tr|L8HVY9|L8HVY9_9CETA Hemopexin OS=Bos mutus GN=M91_19706 PE=3 SV=1	1	10	1	1	23.7	52.103	1.32e-84	34590000	317730000	135270000	162530000	72530000	35628000		54079000	0.332732	0.388733
W5Q3E0;L8IGG9;Q3SX33	>tr|W5Q3E0|W5Q3E0_SHEEP Uncharacterized protein OS=Ovis aries GN=THY1 PE=4 SV=1;>tr|L8IGG9|L8IGG9_9CETA Thy-1 membrane glycoprotein OS=Bos mutus GN=M91_09701 PE=4 SV=1;>tr|Q3SX33|Q3SX33_BOVIN Thy-1 cell surface antigen OS=Bos taurus GN=THY1 PE=1 SV=1	3	4	4	4	26.1	18.052	4.6e-47	933400000	742530000	619870000	7.65267e+08	1050300000	629620000	1145800000	9.41907e+08	1.23082	0.388908
B0LKP0;P02534;W5Q4Q4;Q9BGM6;L8I2P2;C6FX28;Q5MCZ5;V5LVC6;V5LVD6;V5LY00;E3VW76	>tr|B0LKP0|B0LKP0_SHEEP Keratin 31 OS=Ovis aries PE=2 SV=1;>sp|P02534|K1M1_SHEEP Keratin, type I microfibrillar 48 kDa, component 8C-1 OS=Ovis aries PE=1 SV=2;>tr|W5Q4Q4|W5Q4Q4_SHEEP Uncharacterized protein OS=Ovis aries GN=V15 PE=3 SV=1;>tr|Q9BGM6|Q9BGM6_	11	26	26	0	67.3	46.804	0	237040000	30315000000	225780000	1.02593e+10	86353000	355800000	1304100000	5.82084e+08	0.0567374	0.389469
Q3SZQ6;W5Q000;Q9TTX8	>sp|Q3SZQ6|RL32_BOVIN 60S ribosomal protein L32 OS=Bos taurus GN=RPL32 PE=2 SV=3;>tr|W5Q000|W5Q000_SHEEP Uncharacterized protein OS=Ovis aries GN=RPL32 PE=4 SV=1;>tr|Q9TTX8|Q9TTX8_SHEEP Ribosomal protein L32 (Fragment) OS=Ovis aries PE=2 SV=1	3	7	7	7	48.9	15.874	4.79e-44	289620000	238890000	116980000	2.15163e+08	388180000	343260000	162250000	2.97897e+08	1.38451	0.390422
F1BCP5	>tr|F1BCP5|F1BCP5_MUNMU Beta-actin (Fragment) OS=Muntiacus muntjak PE=2 SV=1	1	6	1	1	75	14.75	0	385150000	542040000	759970000	5.62387e+08	334130000	882770000	1457600000	891500000	1.58521	0.390473
Q1JPA0;W5PX92;L8I2J9	>sp|Q1JPA0|AL3B1_BOVIN Aldehyde dehydrogenase family 3 member B1 OS=Bos taurus GN=ALDH3B1 PE=2 SV=1;>tr|W5PX92|W5PX92_SHEEP Uncharacterized protein OS=Ovis aries GN=ALDH3B2 PE=3 SV=1;>tr|L8I2J9|L8I2J9_9CETA Uncharacterized protein (Fragment) OS=Bos mutus G	3	2	1	1	5.6	51.799	4.5e-06	4370400		9965200	7167800		15929000	8509600	12219300	1.70475	0.39051
L8IEG4;W5QJ31;W5QJ32;A4FUD0	>tr|L8IEG4|L8IEG4_9CETA C-1-tetrahydrofolate synthase, cytoplasmic (Fragment) OS=Bos mutus GN=M91_07560 PE=3 SV=1;>tr|W5QJ31|W5QJ31_SHEEP Uncharacterized protein OS=Ovis aries GN=MTHFD1 PE=3 SV=1;>tr|W5QJ32|W5QJ32_SHEEP Uncharacterized protein OS=Ovis arie	4	12	12	11	14.4	101.01	2.12e-29	34084000	37738000	26461000	32761000	157370000	45343000	18607000	7.37733e+07	2.25186	0.390549
W5NWF8;L8IAC6;Q5EA55;Q0IID5;W5PNZ8;L8I8F5	>tr|W5NWF8|W5NWF8_SHEEP Uncharacterized protein OS=Ovis aries GN=GOLGA7 PE=4 SV=1;>tr|L8IAC6|L8IAC6_9CETA Golgin subfamily A member 7 OS=Bos mutus GN=M91_04946 PE=4 SV=1;>sp|Q5EA55|GOGA7_BOVIN Golgin subfamily A member 7 OS=Bos taurus GN=GOLGA7 PE=2 SV=1	6	3	3	3	21.9	17.691	2.61e-07	13407000	14131000	18052000	1.51967e+07	14629000	12109000	14142000	1.36267e+07	0.896688	0.391653
L8HMB1;O46390;P21809;W5PCP8;Q865V9	>tr|L8HMB1|L8HMB1_9CETA Biglycan OS=Bos mutus GN=M91_05352 PE=4 SV=1;>sp|O46390|PGS1_SHEEP Biglycan OS=Ovis aries GN=BGN PE=2 SV=1;>sp|P21809|PGS1_BOVIN Biglycan OS=Bos taurus GN=BGN PE=1 SV=3;>tr|W5PCP8|W5PCP8_SHEEP Biglycan OS=Ovis aries GN=BGN PE=4 SV=1	5	7	7	7	24.9	41.59	1.45e-41	17723000	255960000	68552000	1.14078e+08	64910000	34803000	31830000	4.38477e+07	0.384365	0.391724
W5Q665;L8I2P6;L8I3U3;Q17QL7	>tr|W5Q665|W5Q665_SHEEP Uncharacterized protein OS=Ovis aries GN=KRT13 PE=3 SV=1;>tr|L8I2P6|L8I2P6_9CETA Keratin, type I cytoskeletal 13 (Fragment) OS=Bos mutus GN=M91_00639 PE=3 SV=1;>tr|L8I3U3|L8I3U3_9CETA Keratin, type I cytoskeletal 15 OS=Bos mutus GN=	4	13	2	1	20.3	49.738	2.74e-49	72828000	81998000	80739000	7.85217e+07		188010000	62595000	125302500	1.59577	0.391931
W5NUU3;Q5KR47;L8HZM7	>tr|W5NUU3|W5NUU3_SHEEP Uncharacterized protein OS=Ovis aries GN=TPM3 PE=3 SV=1;>sp|Q5KR47|TPM3_BOVIN Tropomyosin alpha-3 chain OS=Bos taurus GN=TPM3 PE=2 SV=1	3	11	1	1	29.8	32.993	1.55e-49	68549000	51476000	34483000	5.15027e+07	109710000	50065000	55973000	71916000	1.39635	0.39357
L8IYE6;W5NR86;W5Q121;W5P4D9;Q56JY8;Q3SZB6;Q862N7;W5Q555	>tr|L8IYE6|L8IYE6_9CETA Transcription factor BTF3 OS=Bos mutus GN=M91_09410 PE=3 SV=1;>tr|W5NR86|W5NR86_SHEEP Transcription factor BTF3 OS=Ovis aries PE=3 SV=1;>tr|W5Q121|W5Q121_SHEEP Transcription factor BTF3 OS=Ovis aries PE=3 SV=1;>tr|W5P4D9|W5P4D9_SHEE	8	5	5	5	42.3	21.526	9.91e-70	10967000	41275000	27219000	26487000	93533000	18981000		56257000	2.12395	0.394127
L8ID04;L8ITW0;Q56JX6;W5P0I6	>tr|L8ID04|L8ID04_9CETA Uncharacterized protein OS=Bos mutus GN=M91_02959 PE=3 SV=1;>tr|L8ITW0|L8ITW0_9CETA 40S ribosomal protein S28 OS=Bos mutus GN=M91_08701 PE=3 SV=1;>sp|Q56JX6|RS28_BOVIN 40S ribosomal protein S28 OS=Bos taurus GN=RPS28 PE=3 SV=1;>tr|W	4	3	3	3	46.4	7.8709	1.06e-15	125140000	91744000	40945000	85943000	507430000	145820000	24594000	225948000	2.62904	0.395046
L8I3V0;Q3ZBH5;W5PKW0;W5P5T7	>tr|L8I3V0|L8I3V0_9CETA Proliferation-associated protein 2G4 (Fragment) OS=Bos mutus GN=M91_19724 PE=4 SV=1;>tr|Q3ZBH5|Q3ZBH5_BOVIN Proliferation-associated 2G4, 38kDa OS=Bos taurus GN=PA2G4 PE=1 SV=1;>tr|W5PKW0|W5PKW0_SHEEP Uncharacterized protein OS=Ovis	4	12	12	12	36.5	43.931	4.59e-85	141680000	121300000	64611000	109197000	414170000	188960000	41048000	214726000	1.96641	0.395208
W5Q5E7;Q58D08;L8J1N8;W5PRP2	>tr|W5Q5E7|W5Q5E7_SHEEP Pyrroline-5-carboxylate reductase OS=Ovis aries GN=PYCRL PE=3 SV=1;>sp|Q58D08|P5CR3_BOVIN Pyrroline-5-carboxylate reductase 3 OS=Bos taurus GN=PYCRL PE=2 SV=1;>tr|L8J1N8|L8J1N8_9CETA Pyrroline-5-carboxylate reductase (Fragment) OS=B	4	4	4	4	17.4	29.077	6.83e-11	24365000	38875000	43494000	35578000	28391000	51277000	56759000	4.54757e+07	1.2782	0.396182
E1BJK5;L8IC02;W5Q1F0	>tr|E1BJK5|E1BJK5_BOVIN ER lumen protein-retaining receptor OS=Bos taurus GN=KDELR3 PE=3 SV=1;>tr|L8IC02|L8IC02_9CETA ER lumen protein-retaining receptor (Fragment) OS=Bos mutus GN=M91_18832 PE=3 SV=1;>tr|W5Q1F0|W5Q1F0_SHEEP ER lumen protein-retaining rece	3	1	1	1	4.7	24.985	0.00061935	28883000	21439000	77080000	4.24673e+07	8823800	27388000	36424000	2.42119e+07	0.570131	0.39641
Q3SYZ4	>sp|Q3SYZ4|SYDC_BOVIN Aspartate--tRNA ligase, cytoplasmic OS=Bos taurus GN=DARS PE=2 SV=1	1	11	11	0	22.8	57.035	6.16e-43	83799000	113330000	52583000	8.32373e+07	80165000	59924000	55262000	65117000	0.782305	0.397198
L8HTW4;W5Q5A9;F1MHB9	>tr|L8HTW4|L8HTW4_9CETA Type I inositol-1,4,5-trisphosphate 5-phosphatase (Fragment) OS=Bos mutus GN=M91_10733 PE=4 SV=1;>tr|W5Q5A9|W5Q5A9_SHEEP Uncharacterized protein OS=Ovis aries GN=INPP5A PE=4 SV=1;>tr|F1MHB9|F1MHB9_BOVIN Uncharacterized protein OS=Bo	3	3	3	3	8.9	46.131	6.83e-10	13122000	7292000		10207000	8339700	7655100	8162200	8.05233e+06	0.788903	0.397499
L8HXY5	>tr|L8HXY5|L8HXY5_9CETA Histone H1.5 OS=Bos mutus GN=M91_12990 PE=3 SV=1	1	6	5	5	25.2	22.694	1.09e-13	243250000	13251000	9559100	88686700	10891000	18872000	16954000	1.55723e+07	0.175588	0.397928
L8IZ47;Q3ZCK2;W5Q8A7;Q1JPH2	>tr|L8IZ47|L8IZ47_9CETA Ras-related protein Ral-A OS=Bos mutus GN=M91_08639 PE=4 SV=1;>tr|Q3ZCK2|Q3ZCK2_BOVIN V-ral simian leukemia viral oncogene homolog A (Ras related) OS=Bos taurus GN=RALA PE=2 SV=1;>tr|W5Q8A7|W5Q8A7_SHEEP Uncharacterized protein OS=Ov	4	5	2	2	32	23.54	2.07e-31	97692000	47104000	53940000	6.62453e+07	48267000	69386000	21406000	46353000	0.699717	0.398538
W5NQN5;L8HSP6;F1MUP3;Q32PD3	>tr|W5NQN5|W5NQN5_SHEEP Uncharacterized protein OS=Ovis aries GN=SEC62 PE=4 SV=1;>tr|L8HSP6|L8HSP6_9CETA Uncharacterized protein OS=Bos mutus GN=M91_16105 PE=4 SV=1;>tr|F1MUP3|F1MUP3_BOVIN Uncharacterized protein OS=Bos taurus GN=SEC62 PE=4 SV=2;>tr|Q32PD3	4	10	10	10	22.1	45.747	5.05e-55	52621000	49410000	65253000	5.57613e+07	29416000	116850000	97182000	8.11493e+07	1.4553	0.399038
L8HUY8;Q148L0;W5NQH2	>tr|L8HUY8|L8HUY8_9CETA Charged multivesicular body protein 6 OS=Bos mutus GN=M91_17091 PE=4 SV=1;>tr|Q148L0|Q148L0_BOVIN Chromatin modifying protein 6 OS=Bos taurus GN=CHMP6 PE=2 SV=1;>tr|W5NQH2|W5NQH2_SHEEP Uncharacterized protein OS=Ovis aries GN=CHMP6	3	3	3	3	13.9	23.465	3.47e-13	64065000	38160000	60056000	5.40937e+07	40261000	99070000	76405000	71912000	1.3294	0.399691
L8I0Y9;M5FMU6;O18882;P23956;W5PLM9	>tr|L8I0Y9|L8I0Y9_9CETA V-type proton ATPase proteolipid subunit (Fragment) OS=Bos mutus GN=M91_17948 PE=3 SV=1;>tr|M5FMU6|M5FMU6_BOVIN V-type proton ATPase proteolipid subunit OS=Bos taurus GN=ATP6V0C PE=3 SV=1;>sp|O18882|VATL_SHEEP V-type proton ATPase 1	5	2	2	2	15.3	16.454	0.00099943	36984000	51284000	60248000	4.95053e+07		38779000	42871000	40825000	0.824659	0.400294
A5PKL2;W5PB37;L8J0Y8	>tr|A5PKL2|A5PKL2_BOVIN RRAS2 protein OS=Bos taurus GN=RRAS2 PE=2 SV=1;>tr|W5PB37|W5PB37_SHEEP Uncharacterized protein OS=Ovis aries GN=RRAS2 PE=4 SV=1;>tr|L8J0Y8|L8J0Y8_9CETA Ras-related protein R-Ras2 (Fragment) OS=Bos mutus GN=M91_20659 PE=4 SV=1	3	10	8	8	50	23.399	5.39e-137	233740000	207380000	228700000	2.23273e+08	283410000	242040000	209100000	244850000	1.09664	0.400652
W5Q5Q6	>tr|W5Q5Q6|W5Q5Q6_SHEEP Uncharacterized protein OS=Ovis aries GN=COL14A1 PE=4 SV=1	1	23	3	3	18.1	180.53	2e-284	22878000	26075000	36223000	28392000		21114000	78846000	49980000	1.76036	0.401317
P81184	>sp|P81184|LEG1_SHEEP Galectin-1 OS=Ovis aries GN=LGALS1 PE=1 SV=2	1	7	2	0	41.5	14.703	0	370860000	403370000	246660000	3.40297e+08	644080000	714760000	165280000	508040000	1.49293	0.401932
A4IFJ3	>tr|A4IFJ3|A4IFJ3_BOVIN MGC151592 protein OS=Bos taurus GN=MGC151592 PE=2 SV=1	1	2	2	2	20.7	14.923	1.95e-19	8222100		9595900	8909000		10089000	52989000	31539000	3.54013	0.402248
P62261;P62262;W5PRN8;L8J2M8;W5NQ22;Q7M3I2;Q28541;Q7M331	>sp|P62261|1433E_BOVIN 14-3-3 protein epsilon OS=Bos taurus GN=YWHAE PE=2 SV=1;>sp|P62262|1433E_SHEEP 14-3-3 protein epsilon OS=Ovis aries GN=YWHAE PE=1 SV=1;>tr|W5PRN8|W5PRN8_SHEEP 14-3-3 protein epsilon OS=Ovis aries GN=YWHAE PE=3 SV=1;>tr|L8J2M8|L8J2M8_	8	15	15	12	65.9	29.174	1.67e-178	1586400000	1502600000	887750000	1.32558e+09	1461500000	972400000	620490000	1018130000	0.768062	0.402418
W5Q831;Q5E9D5;L8I301	>tr|W5Q831|W5Q831_SHEEP Uncharacterized protein OS=Ovis aries GN=DSTN PE=3 SV=1;>sp|Q5E9D5|DEST_BOVIN Destrin OS=Bos taurus GN=DSTN PE=2 SV=3;>tr|L8I301|L8I301_9CETA Destrin (Fragment) OS=Bos mutus GN=M91_08333 PE=3 SV=1	3	9	8	8	56.4	20.187	2.47e-72	347070000	524330000	210820000	360740000	353940000	280850000	135580000	256790000	0.711842	0.402641
P34955;L8IIU6;I1WXR3;P12725;W5PZS7;I1WXR5;I1WXR8;I1WXR4;I1WXR7	>sp|P34955|A1AT_BOVIN Alpha-1-antiproteinase OS=Bos taurus GN=SERPINA1 PE=1 SV=1;>tr|L8IIU6|L8IIU6_9CETA Alpha-1-antiproteinase (Fragment) OS=Bos mutus GN=M91_13734 PE=3 SV=1;>tr|I1WXR3|I1WXR3_SHEEP Alpha-1-antitrypsin transcript variant 1 OS=Ovis aries GN	9	16	16	16	33.2	46.103	4.4e-60	386950000	1117200000	535670000	679940000	742450000	307250000	217530000	422410000	0.621246	0.402879
W5QEP6;L8J5H0;Q0V8H6	>tr|W5QEP6|W5QEP6_SHEEP Uncharacterized protein OS=Ovis aries GN=MOV10 PE=4 SV=1;>tr|L8J5H0|L8J5H0_9CETA Putative helicase MOV-10 (Fragment) OS=Bos mutus GN=M91_03147 PE=4 SV=1;>sp|Q0V8H6|MOV10_BOVIN Putative helicase MOV-10 OS=Bos taurus GN=MOV10 PE=2 SV=	3	2	2	2	2	115.77	0.00021286	14205000		30082000	22143500	38342000	29024000	23056000	3.01407e+07	1.36115	0.40363
Q28582;W5Q6R3;E3VW83;W5Q6U2;P02539	>tr|Q28582|Q28582_SHEEP Hair type II keratin intermediate filament protein OS=Ovis aries GN=KII-9 PE=3 SV=1;>tr|W5Q6R3|W5Q6R3_SHEEP Uncharacterized protein OS=Ovis aries PE=3 SV=1;>tr|E3VW83|E3VW83_SHEEP Keratin 81 (Fragment) OS=Ovis aries PE=2 SV=1	5	30	1	1	59.8	55.245	0		142140000	10551000	76345500		7223200	7441400	7332300	0.096041	0.404276
F1MTK4;L8IMZ6	>tr|F1MTK4|F1MTK4_BOVIN Uncharacterized protein OS=Bos taurus GN=LPCAT1 PE=4 SV=2;>tr|L8IMZ6|L8IMZ6_9CETA Lysophosphatidylcholine acyltransferase 1 OS=Bos mutus GN=M91_06819 PE=4 SV=1	2	2	2	2	4.5	54.33	1.57e-19	8952100		21002000	14977050	5189600	12200000	11926000	9.77187e+06	0.652456	0.404526
W5P272;L8IC72;E1B7K5	>tr|W5P272|W5P272_SHEEP Uncharacterized protein OS=Ovis aries GN=CKAP5 PE=4 SV=1;>tr|L8IC72|L8IC72_9CETA Cytoskeleton-associated protein 5 OS=Bos mutus GN=M91_11655 PE=4 SV=1;>tr|E1B7K5|E1B7K5_BOVIN Uncharacterized protein OS=Bos taurus GN=CKAP5 PE=4 SV=2	3	4	4	4	2.1	229.43	2.31e-10	9275600	5559400		7417500	8126700	13812000		10969350	1.47885	0.405393
L8I350;A6QL97;W5P4L4	>tr|L8I350|L8I350_9CETA Protein disulfide-isomerase TMX3 (Fragment) OS=Bos mutus GN=M91_05015 PE=4 SV=1;>tr|A6QL97|A6QL97_BOVIN TMX3 protein OS=Bos taurus GN=TMX3 PE=2 SV=1;>tr|W5P4L4|W5P4L4_SHEEP Uncharacterized protein OS=Ovis aries GN=TMX3 PE=4 SV=1	3	4	4	4	10.1	53.213	2.16e-10	30212000	21792000	58480000	36828000		17503000	27570000	22536500	0.611939	0.405661
W5PU40;F1N301;D3YC70;D3YC72	>tr|W5PU40|W5PU40_SHEEP Uncharacterized protein OS=Ovis aries GN=RPL22 PE=4 SV=1;>tr|F1N301|F1N301_BOVIN Uncharacterized protein OS=Bos taurus GN=RPL22 PE=1 SV=2;>tr|D3YC70|D3YC70_BOSGF Heparin-binding protein (Fragment) OS=Bos gaurus frontalis PE=2 SV=1	4	4	4	4	50.4	14.883	5.11e-166	362160000	417880000	184070000	321370000	456220000	487580000	283730000	4.09177e+08	1.27323	0.406767
L8IZM3;Q27966	>tr|L8IZM3|L8IZM3_9CETA Myosin-Ic OS=Bos mutus GN=M91_14681 PE=3 SV=1;>sp|Q27966|MYO1C_BOVIN Unconventional myosin-Ic OS=Bos taurus GN=MYO1C PE=1 SV=3	2	42	42	8	45.9	121.93	0	2000600000	1604100000	2119500000	1.90807e+09	1511200000	2381500000	3420600000	2.43777e+09	1.27761	0.407943
B0JYL2;P10730;W5PRE4	>tr|B0JYL2|B0JYL2_BOVIN Atrial natriuretic peptide receptor 3 OS=Bos taurus GN=NPR3 PE=2 SV=1;>sp|P10730|ANPRC_BOVIN Atrial natriuretic peptide receptor 3 OS=Bos taurus GN=NPR3 PE=1 SV=2;>tr|W5PRE4|W5PRE4_SHEEP Uncharacterized protein OS=Ovis aries GN=NPR3	3	3	3	3	5.4	59.751	1.95e-07	10458000		9419600	9938800	13184000		182810000	97997000	9.86004	0.408209
L8IFK5;Q3T094;W5PFR7	>tr|L8IFK5|L8IFK5_9CETA Protein ETHE1, mitochondrial (Fragment) OS=Bos mutus GN=M91_03804 PE=4 SV=1;>sp|Q3T094|ETHE1_BOVIN Persulfide dioxygenase ETHE1, mitochondrial OS=Bos taurus GN=ETHE1 PE=2 SV=1;>tr|W5PFR7|W5PFR7_SHEEP Uncharacterized protein OS=Ovis	3	2	2	2	9.6	29.641	5.02e-12	19059000	9364100	23736000	1.73864e+07	19867000	14772000	50859000	2.84993e+07	1.63918	0.408393
W5QGR5;L8IHG9;Q2KIY3;G1DGI0	>tr|W5QGR5|W5QGR5_SHEEP Uncharacterized protein OS=Ovis aries GN=WDFY1 PE=4 SV=1;>tr|L8IHG9|L8IHG9_9CETA WD repeat and FYVE domain-containing protein 1 (Fragment) OS=Bos mutus GN=M91_16114 PE=4 SV=1;>sp|Q2KIY3|WDFY1_BOVIN WD repeat and FYVE domain-containi	4	5	5	5	13.2	47.76	3.22e-33	12878000	18440000	27500000	19606000	29100000	21852000		25476000	1.2994	0.408809
W5NT78	>tr|W5NT78|W5NT78_SHEEP Uncharacterized protein OS=Ovis aries GN=CCDC113 PE=4 SV=1	1	1	1	1	2.7	44.263	0.0013026	34351000	47516000	35111000	3.89927e+07	41784000	52274000	39119000	4.43923e+07	1.13848	0.408916
L8I6C9;A0A059XNA0;P10103;W5P5Q1;E1BMK2;W5PQP5;W5Q6J0;W5PPS0	>tr|L8I6C9|L8I6C9_9CETA High mobility group protein B1 OS=Bos mutus GN=M91_03498 PE=4 SV=1;>tr|A0A059XNA0|A0A059XNA0_BOSIN High mobility group box 1 OS=Bos indicus PE=2 SV=1;>sp|P10103|HMGB1_BOVIN High mobility group protein B1 OS=Bos taurus GN=HMGB1 PE=1	8	4	4	4	17.9	26.632	5.73e-13	28585000	31927000	19245000	2.65857e+07	27104000	103960000	22263000	51109000	1.92243	0.410872
A0A0K0WZB8;W5NPL9;L7R4Y6;A5D989;L7R5X3;L8IYN2;Q717R8;A0A0K0WZ98;W5P882;W5NWV4	>tr|A0A0K0WZB8|A0A0K0WZB8_CAPHI Eukaryotic translation elongation factor 1 delta isoform X1 OS=Capra hircus PE=2 SV=1;>tr|W5NPL9|W5NPL9_SHEEP Elongation factor 1-delta OS=Ovis aries GN=EEF1D PE=3 SV=1;>tr|L7R4Y6|L7R4Y6_BOVIN Eukaryotic translation elongati	10	12	12	10	49.6	31.163	1.88e-203	271960000	404390000	129560000	2.68637e+08	805980000	373980000	179830000	4.53263e+08	1.68727	0.411048
W5Q687;Q5XQN5;A5D7M6;L8HXV9;M0QVZ6;C8C9Q2;A0A1L2C873;W5Q659;A6QNX5;L8HW89;W5Q5Q3;P04261;A0A1L2C878;A0A1L2C8D8;P04262;A3KN27;E1BIX9;A4IFN4;A0A1L2C8B4;H9N7X0;L8HV42;L8HWB2;A0A1L2C891	>tr|W5Q687|W5Q687_SHEEP Uncharacterized protein OS=Ovis aries GN=KRT5 PE=3 SV=1;>sp|Q5XQN5|K2C5_BOVIN Keratin, type II cytoskeletal 5 OS=Bos taurus GN=KRT5 PE=1 SV=1;>tr|A5D7M6|A5D7M6_BOVIN KRT5 protein OS=Bos taurus GN=KRT5 PE=1 SV=1;>tr|L8HXV9|L8HXV9_9CE	23	28	27	11	38	62.723	0	2709200000	1648600000	4193100000	2850300000	1128800000	4186100000	14781000000	6.69863e+09	2.35015	0.411545
Q1JQ98;W5Q0V3	>sp|Q1JQ98|AP1S1_BOVIN AP-1 complex subunit sigma-1A OS=Bos taurus GN=AP1S1 PE=2 SV=1;>tr|W5Q0V3|W5Q0V3_SHEEP Uncharacterized protein OS=Ovis aries GN=AP1S1 PE=4 SV=1	2	2	2	2	15.9	18.602	1.03e-36		17850000	10222000	14036000	20298000	16530000		18414000	1.31191	0.411588
F1MIH9;Q2KIY5;L8I2P8;W5PCE0	>tr|F1MIH9|F1MIH9_BOVIN Putative phospholipase B-like 2 OS=Bos taurus GN=PLBD2 PE=4 SV=2;>sp|Q2KIY5|PLBL2_BOVIN Putative phospholipase B-like 2 OS=Bos taurus GN=PLBD2 PE=2 SV=1;>tr|L8I2P8|L8I2P8_9CETA Putative phospholipase B-like 2 (Fragment) OS=Bos mutus	4	8	8	8	14.4	65.723	3.47e-35	43779000	26770000	118910000	63153000	68664000	75626000	151970000	9.87533e+07	1.56372	0.4119
L8I966;Q3SZ20	>tr|L8I966|L8I966_9CETA Serine hydroxymethyltransferase OS=Bos mutus GN=M91_11219 PE=3 SV=1;>sp|Q3SZ20|GLYM_BOVIN Serine hydroxymethyltransferase, mitochondrial OS=Bos taurus GN=SHMT2 PE=2 SV=1	2	8	8	2	18.3	55.605	4.58e-43	69524000	50173000	157740000	92479000	39327000	66443000	76000000	60590000	0.655176	0.412307
W5QH76;L8IE66;Q3T120;V5N403	>tr|W5QH76|W5QH76_SHEEP Elongation of very long chain fatty acids protein 1 OS=Ovis aries GN=ELOVL1 PE=3 SV=1;>tr|L8IE66|L8IE66_9CETA Elongation of very long chain fatty acids protein 1 OS=Bos mutus GN=ELOVL1 PE=3 SV=1;>tr|Q3T120|Q3T120_BOVIN Elongation of	4	1	1	1	4.5	36.479	1.13e-07	11322000	13712000	18442000	14492000		14046000	8469700	11257850	0.776832	0.412615
E1BMF1;L8ID96;W5PER3	>tr|E1BMF1|E1BMF1_BOVIN Transmembrane 9 superfamily member OS=Bos taurus GN=TM9SF3 PE=3 SV=1;>tr|L8ID96|L8ID96_9CETA Transmembrane 9 superfamily member (Fragment) OS=Bos mutus GN=M91_12328 PE=3 SV=1;>tr|W5PER3|W5PER3_SHEEP Transmembrane 9 superfamily membe	3	7	7	7	13.8	67.528	4.33e-59	102600000	69194000	338550000	1.70115e+08	29995000	96857000	136180000	8.76773e+07	0.515401	0.412724
F1ML72;W5PDB9;W5NXS2;Q20A37;L8IIS4;Q3SYZ7;W5P5I6	>tr|F1ML72|F1ML72_BOVIN Uncharacterized protein OS=Bos taurus GN=RPL34 PE=4 SV=1;>tr|W5PDB9|W5PDB9_SHEEP Uncharacterized protein OS=Ovis aries GN=RPL34 PE=4 SV=1;>tr|W5NXS2|W5NXS2_SHEEP Uncharacterized protein OS=Ovis aries PE=4 SV=1;>tr|Q20A37|Q20A37_SHEE	7	5	5	5	32.8	14.617	3.73e-11	138520000	171680000	57027000	122409000	233650000	207490000	83032000	174724000	1.42738	0.415214
W5PFB4;E1BIK7;G1DGD0;L8I138;Q2HJ47	>tr|W5PFB4|W5PFB4_SHEEP Density-regulated protein OS=Ovis aries GN=DENR PE=3 SV=1;>tr|E1BIK7|E1BIK7_BOVIN Density-regulated protein OS=Bos taurus PE=3 SV=2;>tr|G1DGD0|G1DGD0_CAPHI Density-regulated protein OS=Capra hircus GN=DENR PE=2 SV=1;>tr|L8I138|L8I13	5	2	2	2	15.2	22.888	3.05e-13	9080100	16972000		13026050	24037000	14575000		19306000	1.48211	0.415264
Q3ZCH0;V9QIC3;W5Q4W8;L8IC80	>sp|Q3ZCH0|GRP75_BOVIN Stress-70 protein, mitochondrial OS=Bos taurus GN=HSPA9 PE=2 SV=1;>tr|V9QIC3|V9QIC3_BUBBU Mitochondrial heat shock protein A9 OS=Bubalus bubalis GN=HSPA9 PE=2 SV=1;>tr|W5Q4W8|W5Q4W8_SHEEP Uncharacterized protein OS=Ovis aries GN=HSPA	4	27	27	27	42.3	73.741	0	1106900000	643310000	1350900000	1.0337e+09	324870000	821530000	1111600000	7.52667e+08	0.728126	0.415302
P45478;F1MSA1;L8I0I4;W5QG24	>sp|P45478|PPT1_BOVIN Palmitoyl-protein thioesterase 1 OS=Bos taurus GN=PPT1 PE=1 SV=1;>tr|F1MSA1|F1MSA1_BOVIN Palmitoyl-protein thioesterase 1 OS=Bos taurus GN=PPT1 PE=4 SV=2;>tr|L8I0I4|L8I0I4_9CETA Palmitoyl-protein thioesterase 1 (Fragment) OS=Bos mutus	4	3	3	3	13.1	34.142	1.13e-13	22537000	16722000	60230000	33163000	26748000	45395000	91730000	5.46243e+07	1.64715	0.415428
F1ME65;L8IRP0	>tr|F1ME65|F1ME65_BOVIN Uncharacterized protein OS=Bos taurus GN=CKAP4 PE=1 SV=1;>tr|L8IRP0|L8IRP0_9CETA Cytoskeleton-associated protein 4 (Fragment) OS=Bos mutus GN=M91_13977 PE=4 SV=1	2	34	34	3	57.2	64.529	0	3952700000	2551300000	5806300000	4.10343e+09	1127200000	2210600000	4953100000	2.76363e+09	0.673493	0.415979
Q5E964;L8HR52;W5PFU1;G8JKV6	>sp|Q5E964|PSD13_BOVIN 26S proteasome non-ATPase regulatory subunit 13 OS=Bos taurus GN=PSMD13 PE=2 SV=1;>tr|L8HR52|L8HR52_9CETA 26S proteasome non-ATPase regulatory subunit 13 OS=Bos mutus GN=M91_08502 PE=4 SV=1;>tr|W5PFU1|W5PFU1_SHEEP Uncharacterized pro	4	8	8	8	24.7	42.866	1.37e-16	44320000	44964000	17232000	3.55053e+07	30813000	15545000		23179000	0.652831	0.416097
L8IG16;E1BKL9;W5PF14	>tr|L8IG16|L8IG16_9CETA Protocadherin Fat 1 OS=Bos mutus GN=M91_02958 PE=4 SV=1;>tr|E1BKL9|E1BKL9_BOVIN Uncharacterized protein OS=Bos taurus GN=FAT1 PE=4 SV=2;>tr|W5PF14|W5PF14_SHEEP Uncharacterized protein OS=Ovis aries GN=FAT1 PE=4 SV=1	3	8	8	8	2.1	505.76	3e-22	15100000	36212000	17353000	2.28883e+07		10076000	18418000	14247000	0.622457	0.416142
W5Q329	>tr|W5Q329|W5Q329_SHEEP Uncharacterized protein OS=Ovis aries GN=UGGT1 PE=4 SV=1	1	13	1	1	12.6	152.59	1.4e-38	7190600		21540000	14365300	5651100		8260500	6955800	0.484208	0.416517
A6QQV8;L8I213;W5Q6S0	>tr|A6QQV8|A6QQV8_BOVIN LBR protein OS=Bos taurus GN=LBR PE=2 SV=1;>tr|L8I213|L8I213_9CETA Lamin-B receptor OS=Bos mutus GN=M91_07366 PE=4 SV=1;>tr|W5Q6S0|W5Q6S0_SHEEP Uncharacterized protein OS=Ovis aries GN=LBR PE=4 SV=1	3	3	3	3	4.7	71.254	3.6e-10	15517000	19550000	15592000	1.68863e+07	17166000	33415000	15840000	2.21403e+07	1.31114	0.416622
W5Q8B4;W5Q8B6	>tr|W5Q8B4|W5Q8B4_SHEEP Peptidylprolyl isomerase OS=Ovis aries GN=FKBP10 PE=4 SV=1;>tr|W5Q8B6|W5Q8B6_SHEEP Peptidylprolyl isomerase OS=Ovis aries GN=FKBP10 PE=4 SV=1	2	14	3	3	30.6	66.076	7.62e-78	151130000	50394000	116100000	1.05875e+08	31103000	100440000	87474000	7.30057e+07	0.689548	0.417558
W5PBD8;L8HLD8;F1MNT4	>tr|W5PBD8|W5PBD8_SHEEP Uncharacterized protein OS=Ovis aries GN=LAMB1 PE=4 SV=1;>tr|L8HLD8|L8HLD8_9CETA Laminin subunit beta-1 (Fragment) OS=Bos mutus GN=M91_17804 PE=4 SV=1;>tr|F1MNT4|F1MNT4_BOVIN Uncharacterized protein OS=Bos taurus GN=LAMB1 PE=4 SV=2	3	5	5	5	3.3	216.03	2.31e-62	19675000	23655000	35191000	2.61737e+07		8263400	26908000	17585700	0.671885	0.418754
A6QLD9;L8HYQ7;W5QJ65	>tr|A6QLD9|A6QLD9_BOVIN Polypeptide N-acetylgalactosaminyltransferase OS=Bos taurus GN=GALNTL1 PE=2 SV=1;>tr|L8HYQ7|L8HYQ7_9CETA Polypeptide N-acetylgalactosaminyltransferase OS=Bos mutus GN=M91_10589 PE=3 SV=1;>tr|W5QJ65|W5QJ65_SHEEP Polypeptide N-acetylg	3	3	3	3	9.9	62.726	1.01e-37	12723000		62359000	37541000	6907700		17075000	11991350	0.31942	0.419377
W5NVV6;F1N036;Q27968;L8I378	>tr|W5NVV6|W5NVV6_SHEEP Uncharacterized protein OS=Ovis aries GN=DNAJC3 PE=4 SV=1;>tr|F1N036|F1N036_BOVIN DnaJ homolog subfamily C member 3 OS=Bos taurus GN=DNAJC3 PE=4 SV=1;>sp|Q27968|DNJC3_BOVIN DnaJ homolog subfamily C member 3 OS=Bos taurus GN=DNAJC3 P	4	7	7	7	24.4	58.24	1.68e-119	47384000	60310000	58463000	5.53857e+07		40059000	55977000	48018000	0.866975	0.419595
A8E4P3;F1N2R1;W5P601;L8IWB3	>tr|A8E4P3|A8E4P3_BOVIN STOM protein OS=Bos taurus GN=STOM PE=2 SV=1;>tr|F1N2R1|F1N2R1_BOVIN Uncharacterized protein OS=Bos taurus GN=STOM PE=1 SV=2;>tr|W5P601|W5P601_SHEEP Uncharacterized protein OS=Ovis aries GN=STOM PE=4 SV=1;>tr|L8IWB3|L8IWB3_9CETA Ery	4	10	10	10	43.3	31.288	2.06e-98	293400000	163290000	451780000	3.02823e+08	285170000	344060000	679010000	436080000	1.44005	0.41976
L8INA8;W5QG36;F1MXT1;Q2KIP8	>tr|L8INA8|L8INA8_9CETA Very-long-chain (3R)-3-hydroxyacyl-CoA dehydratase (Fragment) OS=Bos mutus GN=M91_04246 PE=3 SV=1;>tr|W5QG36|W5QG36_SHEEP Very-long-chain (3R)-3-hydroxyacyl-CoA dehydratase OS=Ovis aries GN=HACD2 PE=3 SV=1;>tr|F1MXT1|F1MXT1_BOVIN Ve	4	3	3	3	11.2	30.986	8.07e-07	17684000	29056000	34860000	27200000	10895000	18467000	31252000	2.02047e+07	0.742819	0.420135
W5NR63;L8HPQ3;P35466;Q9TSB1;L8IBR4	>tr|W5NR63|W5NR63_SHEEP Protein S100 OS=Ovis aries GN=S100A4 PE=3 SV=1;>tr|L8HPQ3|L8HPQ3_9CETA Protein S100 OS=Bos mutus GN=M91_03026 PE=3 SV=1;>sp|P35466|S10A4_BOVIN Protein S100-A4 OS=Bos taurus GN=S100A4 PE=1 SV=2;>tr|Q9TSB1|Q9TSB1_BOVIN Calvasculin (Fr	5	4	4	4	28.6	14.112	3.15e-11	304710000	367120000	102960000	2.58263e+08	804440000	439740000	110060000	4.51413e+08	1.74788	0.421352
L8I874;A5JSS2;Q861S4;W5PSS9;F1N7U3;G5E6D6;L8I8L4;W5NS45;W5P0R5;W5PET1;F1MUN0;W5NPN0;Q862K6;Q862P2;F1MSB9;E1BM31	>tr|L8I874|L8I874_9CETA Uncharacterized protein (Fragment) OS=Bos mutus GN=M91_00440 PE=4 SV=1;>sp|A5JSS2|RL21_CAPHI 60S ribosomal protein L21 OS=Capra hircus GN=RPL21 PE=2 SV=1;>tr|Q861S4|Q861S4_BOVIN Similar to ribosomal protein L21 (Fragment) OS=Bos tau	16	4	4	4	28.8	18.85	7.46e-24	61784000	81457000	40504000	6.12483e+07	127390000	76782000	48881000	84351000	1.3772	0.421848
A5HEW3;C9E8M7;G1DFV1;L8I0V6;P00171	>tr|A5HEW3|A5HEW3_CAPHI Cytochrome b5 OS=Capra hircus GN=CYB5 PE=2 SV=1;>tr|C9E8M7|C9E8M7_SHEEP Cytochrome b5 OS=Ovis aries GN=CYB5 PE=2 SV=1;>tr|G1DFV1|G1DFV1_CAPHI Cytochrome b5 OS=Capra hircus GN=CYB5A PE=2 SV=1;>tr|L8I0V6|L8I0V6_9CETA Cytochrome b5 OS=	5	4	4	4	41	15.338	3.2e-87	284980000	338210000	548480000	3.90557e+08	156970000	337400000	390250000	2.94873e+08	0.755008	0.421909
E1BK63;L8IHE5;Q5EAD6;G5E686;Q5U7H2;W5PUS9;W5P374;G1DG86	>tr|E1BK63|E1BK63_BOVIN Ribosomal protein L15 OS=Bos taurus PE=3 SV=1;>tr|L8IHE5|L8IHE5_9CETA Ribosomal protein L15 OS=Bos mutus GN=M91_07218 PE=3 SV=1;>sp|Q5EAD6|RL15_BOVIN 60S ribosomal protein L15 OS=Bos taurus GN=RPL15 PE=2 SV=3;>tr|G5E686|G5E686_BOVIN	8	9	9	9	36.8	24.127	4.24e-31	416360000	486690000	371600000	4.24883e+08	694740000	593860000	308520000	5.32373e+08	1.25299	0.422456
W5P900;Q58DW3;L8IEV7	>tr|W5P900|W5P900_SHEEP Uncharacterized protein OS=Ovis aries GN=RPL29 PE=4 SV=1;>sp|Q58DW3|RL29_BOVIN 60S ribosomal protein L29 OS=Bos taurus GN=RPL29 PE=2 SV=3;>tr|L8IEV7|L8IEV7_9CETA 60S ribosomal protein L29 (Fragment) OS=Bos mutus GN=M91_21132 PE=4 SV	3	3	3	3	17.3	17.133	1.12e-05	93050000	130530000	34745000	8.61083e+07	257660000	147640000	38247000	147849000	1.71701	0.422697
W5P5A0;Q95LH5;Q9TSA8	>tr|W5P5A0|W5P5A0_SHEEP Uncharacterized protein OS=Ovis aries GN=FLNA PE=4 SV=1	3	106	3	3	55.2	279.6	0	470030000	323940000	105230000	2.99733e+08	213020000	171030000	228090000	2.04047e+08	0.680761	0.423183
C5ISA9;W5NXF0;A7E3V0;F1MIE2;Q32PJ9;L8IS69;B0LRP6	>tr|C5ISA9|C5ISA9_SHEEP Sequestosome 1 OS=Ovis aries GN=SQSTM1 PE=2 SV=1;>tr|W5NXF0|W5NXF0_SHEEP Uncharacterized protein OS=Ovis aries GN=SQSTM1 PE=4 SV=1;>tr|A7E3V0|A7E3V0_BOVIN Sequestosome 1 OS=Bos taurus GN=SQSTM1 PE=2 SV=1;>tr|F1MIE2|F1MIE2_BOVIN Unch	7	5	5	5	24.8	47.842	1.75e-21	24927000	74355000	35290000	4.48573e+07	102740000	42105000		72422500	1.61451	0.423203
W5P587;G3MYP1;E1BKS1;L8IQV0	>tr|W5P587|W5P587_SHEEP Syndecan OS=Ovis aries GN=SDC4 PE=3 SV=1;>tr|G3MYP1|G3MYP1_BOVIN Syndecan OS=Bos taurus GN=SDC4 PE=3 SV=1;>tr|E1BKS1|E1BKS1_BOVIN Syndecan OS=Bos taurus GN=SDC4 PE=3 SV=1;>tr|L8IQV0|L8IQV0_9CETA Syndecan (Fragment) OS=Bos mutus GN=M	4	1	1	1	6.4	21.984	0.00066093		7237500	6449400	6843450	13309000	6860600		10084800	1.47364	0.423461
W5PMS2;F1MZU2;L8HXE2;A8RCD4;G3N178	>tr|W5PMS2|W5PMS2_SHEEP Uncharacterized protein OS=Ovis aries GN=NSF PE=4 SV=1;>tr|F1MZU2|F1MZU2_BOVIN Uncharacterized protein OS=Bos taurus GN=NSF PE=4 SV=1;>tr|L8HXE2|L8HXE2_9CETA Vesicle-fusing ATPase (Fragment) OS=Bos mutus GN=M91_04834 PE=4 SV=1	5	12	12	12	18.9	83.121	5.17e-30	36942000	32359000	70829000	46710000	68384000	57005000	50027000	58472000	1.25181	0.425147
E1BEL7;A0A097PIG9;A0A1B0Z542;A0A1C9EIU3;A0A1C9EIV3;A0A1C9EIV9;A0A1C9EIX3;A0A1C9EIX6;E9RHW1;Q3T149;A0A1C9EIV5;L8IQW1;A0A1C9EIX0;Q58DP7;G3X7S2;A0A1B2YKK4;A0A1B2YKM9;I3WAE6;W5PWA8;A0A1B3B5V3	>tr|E1BEL7|E1BEL7_BOVIN Heat shock protein beta-1 OS=Bos taurus GN=HSPB1 PE=1 SV=2;>tr|A0A097PIG9|A0A097PIG9_BUBBU HSPB1 OS=Bubalus bubalis GN=HSPB1 PE=2 SV=1;>tr|A0A1B0Z542|A0A1B0Z542_BOVIN Heat shock 27 kDa protein 1 OS=Bos taurus GN=HspB1 PE=3 SV=1;>tr|	20	8	8	8	52.7	22.578	1.11e-105	259240000	481140000	157730000	299370000	234890000	196920000	210610000	214140000	0.715302	0.425402
W5PVC8;L8IAQ9;G8JKW5;Q5EAE0;Q1JPI9;Q1JPK4;G8JL03	>tr|W5PVC8|W5PVC8_SHEEP Uncharacterized protein OS=Ovis aries GN=ERGIC3 PE=4 SV=1;>tr|L8IAQ9|L8IAQ9_9CETA Endoplasmic reticulum-Golgi intermediate compartment protein 3 OS=Bos mutus GN=M91_17815 PE=4 SV=1;>tr|G8JKW5|G8JKW5_BOVIN Endoplasmic reticulum-Golgi	7	3	3	3	7.8	43.344	1.27e-07	21839000	14499000	38257000	24865000	20267000	18144000	17374000	18595000	0.747838	0.425645
C5IWT9;F2Z4I5;L8ILR6;Q2KI07;W5PD64	>tr|C5IWT9|C5IWT9_SHEEP ADP-ribosylation factor-like 8B OS=Ovis aries GN=ARL8B PE=2 SV=1;>tr|F2Z4I5|F2Z4I5_BOVIN ADP-ribosylation factor-like protein 8B OS=Bos taurus GN=ARL8B PE=3 SV=1;>tr|L8ILR6|L8ILR6_9CETA ADP-ribosylation factor-like protein 8B OS=Bos	5	4	4	2	25.8	21.539	1.02e-250	272630000	139120000	261940000	2.24563e+08	207990000	228210000	565130000	3.33777e+08	1.48634	0.426443
E1BFQ6;L8J405	>tr|E1BFQ6|E1BFQ6_BOVIN Uncharacterized protein OS=Bos taurus GN=ITGA6 PE=1 SV=1;>tr|L8J405|L8J405_9CETA Integrin alpha-6 (Fragment) OS=Bos mutus GN=M91_01845 PE=3 SV=1	2	16	16	1	20.2	119.23	1.04e-110	50044000		48726000	49385000	409340000	93147000	48868000	183785000	3.72147	0.426662
W5P6I6;F1N0F7;L8I1I8;A8KC77;Q3T0Z6	>tr|W5P6I6|W5P6I6_SHEEP Uncharacterized protein OS=Ovis aries GN=EIF5 PE=4 SV=1;>tr|F1N0F7|F1N0F7_BOVIN Uncharacterized protein OS=Bos taurus GN=EIF5 PE=4 SV=1;>tr|L8I1I8|L8I1I8_9CETA Eukaryotic translation initiation factor 5 OS=Bos mutus GN=M91_04949 PE=	5	7	7	7	18.8	49.135	1.14e-18	34022000	62261000	35345000	43876000	161860000	77685000	10551000	8.33653e+07	1.90002	0.427168
G3MWI5;A2VDN8;W5Q951;L8HQU0	>tr|G3MWI5|G3MWI5_BOVIN Coronin OS=Bos taurus GN=CORO1C PE=3 SV=1;>tr|A2VDN8|A2VDN8_BOVIN Coronin OS=Bos taurus GN=CORO1C PE=2 SV=1;>tr|W5Q951|W5Q951_SHEEP Coronin OS=Ovis aries GN=CORO1C PE=3 SV=1;>tr|L8HQU0|L8HQU0_9CETA Coronin (Fragment) OS=Bos mutus GN	4	9	9	9	15.5	58.265	7.37e-33	141670000	101860000	63101000	1.0221e+08	85030000	97992000	54539000	79187000	0.774746	0.427261
P0C914	>sp|P0C914|OCC1_BOVIN Overexpressed in colon carcinoma 1 protein homolog OS=Bos taurus PE=3 SV=1	1	2	2	2	20.6	6.3899	1.03e-20	47202000	15103000		31152500	29011000	14828000	11823000	18554000	0.595586	0.42803
W5PEJ0;Q08DC7;L8HVC9	>tr|W5PEJ0|W5PEJ0_SHEEP Uncharacterized protein OS=Ovis aries GN=RGS19 PE=4 SV=1;>sp|Q08DC7|RGS19_BOVIN Regulator of G-protein signaling 19 OS=Bos taurus GN=RGS19 PE=2 SV=1	3	3	3	3	21.8	23.248	4.55e-20	8054800	4926500		6490650	5406000	4305000		4855500	0.748076	0.428037
E1BKX3;L8HYK6;W5QCX7	>tr|E1BKX3|E1BKX3_BOVIN Uncharacterized protein OS=Bos taurus GN=MYBBP1A PE=1 SV=1;>tr|L8HYK6|L8HYK6_9CETA Myb-binding protein 1A OS=Bos mutus GN=M91_06332 PE=4 SV=1;>tr|W5QCX7|W5QCX7_SHEEP Uncharacterized protein OS=Ovis aries GN=MYBBP1A PE=4 SV=1	3	9	9	9	7.6	152.04	1.67e-34	63879000		20649000	42264000	26865000		12934000	19899500	0.470838	0.428544
W5Q675;M5FJW2;O18789;L8J5I0;A5JSS1;Q19LI3;Q862M9;W5P1Z6;W5Q3H4;Q862E0;W5PDP5	>tr|W5Q675|W5Q675_SHEEP Uncharacterized protein OS=Ovis aries GN=LOC101109132 PE=3 SV=1;>tr|M5FJW2|M5FJW2_BOVIN 40S ribosomal protein S2 OS=Bos taurus GN=RPS2 PE=3 SV=1;>sp|O18789|RS2_BOVIN 40S ribosomal protein S2 OS=Bos taurus GN=RPS2 PE=2 SV=2;>tr|L8J5I	11	12	12	12	42.5	31.853	1.78e-49	463240000	343570000	296640000	3.67817e+08	626490000	652380000	218020000	4.98963e+08	1.35655	0.428917
F1N120;Q0VCI7;L8J0W4;G1DGD9;W5NWR6	>tr|F1N120|F1N120_BOVIN Uncharacterized protein OS=Bos taurus GN=LXN PE=4 SV=2;>tr|Q0VCI7|Q0VCI7_BOVIN Latexin OS=Bos taurus GN=LXN PE=2 SV=1;>tr|L8J0W4|L8J0W4_9CETA Uncharacterized protein OS=Bos mutus GN=M91_01853 PE=4 SV=1;>tr|G1DGD9|G1DGD9_CAPHI Latexi	5	3	3	3	18.9	25.567	3.48e-08	25174000	23154000		24164000	26647000	18247000	15914000	2.02693e+07	0.838824	0.42939
A1L5A6;L8INI8	>sp|A1L5A6|ADRM1_BOVIN Proteasomal ubiquitin receptor ADRM1 OS=Bos taurus GN=ADRM1 PE=2 SV=1;>tr|L8INI8|L8INI8_9CETA Proteasomal ubiquitin receptor ADRM1 OS=Bos mutus GN=M91_18945 PE=4 SV=1	2	1	1	1	3.9	41.954	5.76e-05	8034700	10394000		9214350	8986600	4274500		6630550	0.71959	0.430183
E1BCI8;L8IHQ9;W5NZ86;Q7YS96;F1N2X1;W5QF60;L8HRG3;A8KC65;L8IHU6;W5PE03	>tr|E1BCI8|E1BCI8_BOVIN Uncharacterized protein OS=Bos taurus GN=SLC12A4 PE=4 SV=1;>tr|L8IHQ9|L8IHQ9_9CETA Solute carrier family 12 member 4 (Fragment) OS=Bos mutus GN=M91_18248 PE=4 SV=1;>tr|W5NZ86|W5NZ86_SHEEP Uncharacterized protein OS=Ovis aries GN=SLC	10	16	16	16	18.2	120.59	5.51e-199	79451000	106600000	91953000	92668000	88847000	71188000	91438000	8.38243e+07	0.904566	0.430712
W5P671	>tr|W5P671|W5P671_SHEEP Uncharacterized protein OS=Ovis aries GN=DDAH2 PE=4 SV=1	1	13	1	1	65.4	29.807	4.08e-200	137600000	124900000	106920000	123140000	105940000	137330000	211300000	1.51523e+08	1.2305	0.431452
A7MB62;W5QFG6;F1MRG7;W5QFG8;L8IPH1	>sp|A7MB62|ARP2_BOVIN Actin-related protein 2 OS=Bos taurus GN=ACTR2 PE=1 SV=1;>tr|W5QFG6|W5QFG6_SHEEP Uncharacterized protein OS=Ovis aries GN=ACTR2 PE=3 SV=1;>tr|F1MRG7|F1MRG7_BOVIN Actin-related protein 2 OS=Bos taurus GN=ACTR2 PE=3 SV=2;>tr|W5QFG8|W5QF	5	9	9	9	31.7	44.76	1.56e-56	220840000	251760000	192490000	2.21697e+08	452540000	246870000	183350000	2.94253e+08	1.32728	0.431485
L8HS41;Q58DQ3;G3N2R1;W5P1D5;W5P3H2;W5P3J0;B0LRM7;W5QD20;A8NJ40;W5Q8W5;A1XED0	>tr|L8HS41|L8HS41_9CETA 60S ribosomal protein L6 OS=Bos mutus GN=M91_04399 PE=3 SV=1;>sp|Q58DQ3|RL6_BOVIN 60S ribosomal protein L6 OS=Bos taurus GN=RPL6 PE=2 SV=3;>tr|G3N2R1|G3N2R1_BOVIN 60S ribosomal protein L6 OS=Bos taurus PE=3 SV=1;>tr|W5P1D5|W5P1D5_SH	11	11	11	11	38	32.689	6.11e-84	753090000	692800000	522610000	6.56167e+08	1013800000	1021500000	456090000	8.30463e+08	1.26563	0.431645
Q148L1;W5P5F1;L8IXU6;Q0V8N3;F1ME95	>sp|Q148L1|GP108_BOVIN Protein GPR108 OS=Bos taurus GN=GPR108 PE=2 SV=1;>tr|W5P5F1|W5P5F1_SHEEP Uncharacterized protein OS=Ovis aries GN=GPR108 PE=4 SV=1;>tr|L8IXU6|L8IXU6_9CETA Protein GPR108 (Fragment) OS=Bos mutus GN=M91_08679 PE=4 SV=1;>tr|Q0V8N3|Q0V8N	5	2	2	2	5.7	61.402	3.54e-28	5173000	10886000	17822000	1.12937e+07	7804700	6186000		6995350	0.619405	0.433059
F1MW68;P05689;W5Q3N1;L8HMW8	>tr|F1MW68|F1MW68_BOVIN Cathepsin Z OS=Bos taurus GN=CTSZ PE=3 SV=1;>sp|P05689|CATZ_BOVIN Cathepsin Z OS=Bos taurus GN=CTSZ PE=2 SV=2;>tr|W5Q3N1|W5Q3N1_SHEEP Uncharacterized protein OS=Ovis aries GN=CTSZ PE=3 SV=1;>tr|L8HMW8|L8HMW8_9CETA Cathepsin Z (Fragm	4	4	4	4	16.1	33.886	2.97e-09		4200700	12031000	8115850		7477200	68822000	38149600	4.70063	0.433857
F1N169	>tr|F1N169|F1N169_BOVIN Uncharacterized protein OS=Bos taurus GN=FLNA PE=1 SV=2	1	107	2	0	55.6	281.05	0	119090000	102630000	32524000	84748000	98726000	40129000	24616000	5.44903e+07	0.642969	0.434109
L8IRL3;Q148F1;W5PA65	>tr|L8IRL3|L8IRL3_9CETA Cofilin-2 (Fragment) OS=Bos mutus GN=M91_01765 PE=3 SV=1;>sp|Q148F1|COF2_BOVIN Cofilin-2 OS=Bos taurus GN=CFL2 PE=2 SV=1;>tr|W5PA65|W5PA65_SHEEP Uncharacterized protein OS=Ovis aries GN=CFL2 PE=3 SV=1	3	6	4	4	45.2	18.733	9.27e-59	17539000	12076000		14807500	27163000	15535000	16024000	19574000	1.3219	0.435374
L8I5L9;Q3SYT9;W5Q4P4;L8HV28;Q17QV0;W5PT30	>tr|L8I5L9|L8I5L9_9CETA Poly(RC)-binding protein 2 (Fragment) OS=Bos mutus GN=M91_05587 PE=4 SV=1;>tr|Q3SYT9|Q3SYT9_BOVIN Poly(RC) binding protein 2 OS=Bos taurus GN=PCBP2 PE=1 SV=1;>tr|W5Q4P4|W5Q4P4_SHEEP Uncharacterized protein OS=Ovis aries GN=PCBP2 PE=	6	11	6	6	38.5	37.227	4.23e-83	91423000	98196000	73630000	8.77497e+07	212410000	151820000	35315000	1.33182e+08	1.51775	0.435483
Q3SZV7;W5QAB1	>sp|Q3SZV7|HEMO_BOVIN Hemopexin OS=Bos taurus GN=HPX PE=2 SV=1;>tr|W5QAB1|W5QAB1_SHEEP Uncharacterized protein OS=Ovis aries GN=HPX PE=4 SV=1	2	14	14	5	35.9	52.209	0	517720000	3789400000	1722700000	2009940000	1905500000	967840000	441290000	1.10488e+09	0.549706	0.436062
W5NZK9	>tr|W5NZK9|W5NZK9_SHEEP Uncharacterized protein OS=Ovis aries GN=FLNC PE=4 SV=1	1	53	1	1	27.5	275.88	0	30677000	28538000	22892000	27369000	33026000	26261000	30745000	3.00107e+07	1.09652	0.436151
A5D7D1;W5P707;L8HPL3;W5P708;E1BLT3;W5P9S1	>sp|A5D7D1|ACTN4_BOVIN Alpha-actinin-4 OS=Bos taurus GN=ACTN4 PE=2 SV=1;>tr|W5P707|W5P707_SHEEP Uncharacterized protein OS=Ovis aries GN=ACTN4 PE=4 SV=1;>tr|L8HPL3|L8HPL3_9CETA Alpha-actinin-4 (Fragment) OS=Bos mutus GN=M91_13316 PE=4 SV=1;>tr|W5P708|W5P70	6	54	54	37	66.3	104.93	0	3506100000	4635000000	2901500000	3.68087e+09	5408100000	4396700000	3294000000	4.36627e+09	1.18621	0.436801
L8IYJ2;Q3SYU6;W5PLD5;F1MHV8	>tr|L8IYJ2|L8IYJ2_9CETA Calponin OS=Bos mutus GN=M91_07145 PE=3 SV=1;>sp|Q3SYU6|CNN2_BOVIN Calponin-2 OS=Bos taurus GN=CNN2 PE=2 SV=3;>tr|W5PLD5|W5PLD5_SHEEP Calponin OS=Ovis aries GN=CNN2 PE=3 SV=1;>tr|F1MHV8|F1MHV8_BOVIN Calponin OS=Bos taurus GN=CNN2 PE	4	6	6	5	22.7	33.437	5.89e-24	35998000	40160000	26491000	3.42163e+07	36237000	39880000	37353000	3.78233e+07	1.10542	0.437484
L8IFV9;P53619;W5PLQ6	>tr|L8IFV9|L8IFV9_9CETA Coatomer subunit delta (Fragment) OS=Bos mutus GN=M91_09730 PE=3 SV=1;>sp|P53619|COPD_BOVIN Coatomer subunit delta OS=Bos taurus GN=ARCN1 PE=1 SV=1;>tr|W5PLQ6|W5PLQ6_SHEEP Coatomer subunit delta OS=Ovis aries GN=ARCN1 PE=3 SV=1	3	9	9	9	19.6	57.271	1.16e-28	57513000	94748000	58582000	70281000	68938000	60988000	44097000	5.80077e+07	0.825368	0.437997
L8J1F9;W5PH60;Q3ZBX5;W5PHU8;W5QEE9;W5PFK3	>tr|L8J1F9|L8J1F9_9CETA Aminoacyl tRNA synthase complex-interacting multifunctional protein 1 (Fragment) OS=Bos mutus GN=M91_03632 PE=4 SV=1;>tr|W5PH60|W5PH60_SHEEP Uncharacterized protein OS=Ovis aries PE=4 SV=1;>tr|Q3ZBX5|Q3ZBX5_BOVIN Small inducible cyt	6	4	4	4	15.3	35.851	8.25e-29	25475000	37471000		31473000	26193000	25205000		25699000	0.816541	0.438594
E1B9M8	>tr|E1B9M8|E1B9M8_BOVIN Uncharacterized protein OS=Bos taurus GN=SCARF2 PE=4 SV=2	1	6	6	6	9.4	88.798	1.55e-28	7205500	15757000		11481250	8549000	5806800		7177900	0.625185	0.439003
W5PRY8;W5PQW2;E1BMG1;Q0VCJ5;L8IES7;L8IJZ7	>tr|W5PRY8|W5PRY8_SHEEP Uncharacterized protein OS=Ovis aries GN=MOB1A PE=4 SV=1;>tr|W5PQW2|W5PQW2_SHEEP Uncharacterized protein OS=Ovis aries GN=MOB1B PE=4 SV=1;>tr|E1BMG1|E1BMG1_BOVIN Uncharacterized protein OS=Bos taurus GN=MOB1B PE=4 SV=1;>tr|Q0VCJ5|Q0	6	3	3	3	15.2	26.562	1.18e-06	5366100	6645700		6005900	10479000	5996400		8237700	1.3716	0.439354
L8IAD0;Q05B71;W5PRB3	>tr|L8IAD0|L8IAD0_9CETA CDGSH iron-sulfur domain-containing protein 2 (Fragment) OS=Bos mutus GN=M91_17852 PE=4 SV=1;>sp|Q05B71|CISD2_BOVIN CDGSH iron-sulfur domain-containing protein 2 OS=Bos taurus GN=CISD2 PE=2 SV=1;>tr|W5PRB3|W5PRB3_SHEEP Uncharacteriz	3	3	3	3	27.5	16.815	2.98e-23	68875000	32820000	70256000	57317000	35625000	52237000	49894000	4.59187e+07	0.801135	0.440034
Q27971;A8IF71;L8I222;W5Q0H3;A8J6U5;C9DFF7	>sp|Q27971|CAN2_BOVIN Calpain-2 catalytic subunit OS=Bos taurus GN=CAPN2 PE=2 SV=2;>tr|A8IF71|A8IF71_SHEEP Calpain II 80 kDa subunit OS=Ovis aries PE=2 SV=1;>tr|L8I222|L8I222_9CETA Calpain-2 catalytic subunit (Fragment) OS=Bos mutus GN=M91_07377 PE=3 SV=1;	6	8	8	8	15.1	79.934	2.15e-30	90779000	122900000	39880000	8.45197e+07	78472000	71667000	30264000	6.01343e+07	0.711483	0.440125
L8J280;W5PRP4;A0JNE7	>tr|L8J280|L8J280_9CETA Vesicle transport through interaction with t-SNAREs-like protein 1A OS=Bos mutus GN=M91_09910 PE=4 SV=1;>tr|W5PRP4|W5PRP4_SHEEP Uncharacterized protein OS=Ovis aries GN=VTI1A PE=4 SV=1	3	4	4	4	26.7	25.101	1.14e-113		15964000	12242000	14103000	17364000	15029000		16196500	1.14844	0.441197
L8IGX6;Q3SZ87;W5NYA9	>tr|L8IGX6|L8IGX6_9CETA Uncharacterized protein OS=Bos mutus GN=M91_11447 PE=4 SV=1;>sp|Q3SZ87|SSRG_BOVIN Translocon-associated protein subunit gamma OS=Bos taurus GN=SSR3 PE=2 SV=1;>tr|W5NYA9|W5NYA9_SHEEP Uncharacterized protein OS=Ovis aries GN=SSR3 PE=4	3	2	2	2	11.5	21.911	7.78e-12	339500000	154460000	331680000	2.75213e+08	74954000	245350000	280960000	2.00421e+08	0.72824	0.441826
L8ITA6;F1MXE4;Q3T0B2	>tr|L8ITA6|L8ITA6_9CETA 26S proteasome non-ATPase regulatory subunit 6 OS=Bos mutus GN=M91_02408 PE=4 SV=1;>tr|F1MXE4|F1MXE4_BOVIN 26S proteasome non-ATPase regulatory subunit 6 OS=Bos taurus GN=PSMD6 PE=4 SV=1;>sp|Q3T0B2|PSMD6_BOVIN 26S proteasome non-ATP	3	5	5	1	10.9	49.85	1.29e-22	52916000	48132000	24130000	41726000	50180000	23197000	17365000	3.02473e+07	0.724904	0.442177
P10096;W5PDG3;A9YF36;D7R7V6;Q28554;Q712W6;Q0QES8;Q6DQI7;Q8HY38;Q862S2;Q862P5;Q95KM2;D3JWS4;O77679;Q95329;W5QBT3;Q862K5;Q9MZ05;Q4H0Z3;Q56AP4;Q30DT4;Q865L2;E1BH84;L8J0Q6;Q9XSN4;Q862K1;G9BML1;G9BML2;E5KWL4;Q2QJG6	>sp|P10096|G3P_BOVIN Glyceraldehyde-3-phosphate dehydrogenase OS=Bos taurus GN=GAPDH PE=1 SV=4;>tr|W5PDG3|W5PDG3_SHEEP Glyceraldehyde-3-phosphate dehydrogenase OS=Ovis aries GN=GAPDH PE=3 SV=1;>tr|A9YF36|A9YF36_BOSMU Glyceraldehyde-3-phosphate dehydrogenas	30	15	15	13	61.6	35.868	6.3e-269	1673300000	1632700000	1115800000	1.47393e+09	4271300000	2086400000	734220000	2.36397e+09	1.60385	0.44275
Q4JH16	>tr|Q4JH16|Q4JH16_BOVIN Myosin heavy chain isoform SMA (Fragment) OS=Bos taurus PE=2 SV=1	1	1	1	1	26.9	5.5753	6.17e-08	42738000	27835000	49505000	40026000		34050000	78773000	56411500	1.40937	0.443289
D7RIF5;P60712;P60713;L8J518;W5NYG7;W5QAX3;I6W7A2;F1MRD0;Q0PGG4;A1XSX3;J9V335;O46401;G3ELM1;F1BCP7;F1BCP8;F1BCP9;Q4JHR5;Q862P9;G8FRI6;Q9TTW4;W5PKC6;Q865G0;H9CWF1;Q4U3D1;Q9XSX8;A0A192HE54;G9BML0;B6D1P0;G9BWN8;Q28242;Q2QJG3	>tr|D7RIF5|D7RIF5_SHEEP Beta-actin variant 2 OS=Ovis aries GN=ACTB PE=2 SV=1;>sp|P60712|ACTB_BOVIN Actin, cytoplasmic 1 OS=Bos taurus GN=ACTB PE=1 SV=1;>sp|P60713|ACTB_SHEEP Actin, cytoplasmic 1 OS=Ovis aries GN=ACTB PE=2 SV=1;>tr|L8J518|L8J518_9CETA Actin	31	20	1	1	72.8	41.736	0	1073400000	1005500000	1336600000	1138500000	948540000	1357800000	1757200000	1.35451e+09	1.18974	0.443562
Q3SYT0;L8I7X3	>sp|Q3SYT0|OBRG_BOVIN Leptin receptor gene-related protein OS=Bos taurus GN=LEPROT PE=2 SV=1;>tr|L8I7X3|L8I7X3_9CETA Leptin receptor related protein (Fragment) OS=Bos mutus GN=M91_04648 PE=4 SV=1	2	1	1	1	9.9	14.228	0.0013578		3478400	8823200	6150800	3793000	3437200		3615100	0.587745	0.443697
Q3T0Y8;W5QH60;W5QFM8;L8IVX7	>sp|Q3T0Y8|VAMP8_BOVIN Vesicle-associated membrane protein 8 OS=Bos taurus GN=VAMP8 PE=3 SV=1;>tr|W5QH60|W5QH60_SHEEP Uncharacterized protein OS=Ovis aries GN=VAMP8 PE=4 SV=1;>tr|W5QFM8|W5QFM8_SHEEP Uncharacterized protein OS=Ovis aries PE=4 SV=1;>tr|L8IVX	4	3	3	3	29	11.357	2.19e-12	41990000	62991000	42317000	4.90993e+07	61867000	59807000	46940000	5.62047e+07	1.14471	0.443778
W5PD48;L8IA39;Q2KJI3;L8IUY5;Q17QT7;W5Q4P9	>tr|W5PD48|W5PD48_SHEEP Uncharacterized protein OS=Ovis aries GN=FAM49B PE=4 SV=1;>tr|L8IA39|L8IA39_9CETA Protein FAM49B OS=Bos mutus GN=M91_03450 PE=4 SV=1;>sp|Q2KJI3|FA49B_BOVIN Protein FAM49B OS=Bos taurus GN=FAM49B PE=2 SV=1	6	8	8	8	27.9	42.115	2.14e-31	58213000	37073000	36913000	4.40663e+07	43199000	40182000	26639000	3.66733e+07	0.83223	0.444086
F1MFF4;W5QHX2;F1MK07;L8IV16;W5Q6A2;A4FUH0;L8HZH3	>tr|F1MFF4|F1MFF4_BOVIN Uncharacterized protein OS=Bos taurus PE=4 SV=2;>tr|W5QHX2|W5QHX2_SHEEP Uncharacterized protein OS=Ovis aries GN=LOC101104199 PE=4 SV=1;>tr|F1MK07|F1MK07_BOVIN 60S ribosomal protein L22-like 1 OS=Bos taurus GN=RPL22L1 PE=4 SV=1;>tr|	7	2	2	2	27.5	15.562	1.56e-76	28872000	41543000		35207500	39408000	43598000		41503000	1.17881	0.445042
A0A140T886;P53620;Q0V888	>tr|A0A140T886|A0A140T886_BOVIN Coatomer subunit gamma OS=Bos taurus GN=COPG1 PE=3 SV=1;>sp|P53620|COPG1_BOVIN Coatomer subunit gamma-1 OS=Bos taurus GN=COPG1 PE=1 SV=1	3	21	21	6	31.7	97.399	3.55e-94	134200000	237550000	152190000	1.74647e+08	213110000	115330000	51384000	126608000	0.724938	0.445405
W5PNV0;P61284;W5PR69;L8I8V0;G3MZG7;Q862L6;L8J5H6;L8I7U6;F1MDX5;F1N3R2;F1MB63	>tr|W5PNV0|W5PNV0_SHEEP Uncharacterized protein OS=Ovis aries GN=RPL12 PE=3 SV=1;>sp|P61284|RL12_BOVIN 60S ribosomal protein L12 OS=Bos taurus GN=RPL12 PE=2 SV=1;>tr|W5PR69|W5PR69_SHEEP Uncharacterized protein OS=Ovis aries PE=3 SV=1;>tr|L8I8V0|L8I8V0_9CET	11	7	7	7	50.8	20.825	3.25e-198	701760000	394960000	230540000	442420000	671040000	841550000	331240000	614610000	1.3892	0.445895
L8IF09;B0JYK2;Q9GLC9;W5PDH7;W5NRM6	>tr|L8IF09|L8IF09_9CETA Niemann-Pick C1 protein (Fragment) OS=Bos mutus GN=M91_00536 PE=4 SV=1;>tr|B0JYK2|B0JYK2_BOVIN NPC1 protein OS=Bos taurus GN=NPC1 PE=2 SV=1;>tr|Q9GLC9|Q9GLC9_BOVIN Niemann-Pick type C1 disease protein OS=Bos taurus GN=NPC1 PE=2 SV=1	5	9	9	9	7.3	143.7	2.34e-43	155840000	94678000	145350000	131956000	160740000	116580000	191450000	1.56257e+08	1.18416	0.446123
E1BC70;W5Q428	>tr|E1BC70|E1BC70_BOVIN Uncharacterized protein OS=Bos taurus GN=VPS37C PE=4 SV=1;>tr|W5Q428|W5Q428_SHEEP Uncharacterized protein OS=Ovis aries GN=VPS37C PE=4 SV=1	2	3	3	3	13.1	38.07	3.69e-09	9090400	10477000	5522000	8.36313e+06	9109600	11208000		10158800	1.21471	0.447451
L8IFV7;F1MZJ5;O77635	>tr|L8IFV7|L8IFV7_9CETA Disintegrin and metalloproteinase domain-containing protein 9 OS=Bos mutus GN=M91_10727 PE=4 SV=1;>tr|F1MZJ5|F1MZJ5_BOVIN Uncharacterized protein OS=Bos taurus GN=ADAM9 PE=4 SV=2	3	14	3	3	21.8	93.191	8.63e-193	44325000	61081000	45157000	5.01877e+07	30233000	22642000	63330000	38735000	0.771803	0.448031
A6H703;W5PKT6;W5PKT3;P48452;A5D7T5;L8IFI0;W5PCZ2;L8IKS2;L8HPM6;W5PVX8;F1N6B7;A9ZTK8;A9ZTJ7;A9ZTJ8	>tr|A6H703|A6H703_BOVIN Serine/threonine-protein phosphatase OS=Bos taurus GN=PPP3CB PE=2 SV=1;>tr|W5PKT6|W5PKT6_SHEEP Serine/threonine-protein phosphatase OS=Ovis aries GN=PPP3CC PE=3 SV=1;>tr|W5PKT3|W5PKT3_SHEEP Serine/threonine-protein phosphatase OS=Ov	14	2	2	2	3.8	59.097	1.03e-05	26076000	32469000	35398000	3.13143e+07	25466000	30253000		27859500	0.889672	0.448812
E1BDX8	>tr|E1BDX8|E1BDX8_BOVIN Uncharacterized protein OS=Bos taurus GN=DYNC1H1 PE=1 SV=1	1	112	112	6	29.3	532.05	0	967850000	1218700000	853110000	1013220000	1625100000	1269900000	801910000	1.2323e+09	1.21622	0.449574
W5P5M8;W5P5M7;Q0VD53;L8HZY6	>tr|W5P5M8|W5P5M8_SHEEP Uncharacterized protein OS=Ovis aries GN=VPS26A PE=4 SV=1;>tr|W5P5M7|W5P5M7_SHEEP Uncharacterized protein OS=Ovis aries GN=VPS26A PE=4 SV=1;>sp|Q0VD53|VP26A_BOVIN Vacuolar protein sorting-associated protein 26A OS=Bos taurus GN=VPS2	4	8	8	8	28.3	42.364	2.72e-43	35303000	32446000		33874500	145910000	63022000	18263000	7.57317e+07	2.23565	0.449786
Q0VCY1;L8I7Q3;W5NT68;W5NT69	>sp|Q0VCY1|VAPA_BOVIN Vesicle-associated membrane protein-associated protein A OS=Bos taurus GN=VAPA PE=2 SV=1;>tr|L8I7Q3|L8I7Q3_9CETA Vesicle-associated membrane protein-associated protein A (Fragment) OS=Bos mutus GN=M91_17970 PE=4 SV=1;>tr|W5NT68|W5NT68	4	7	7	6	34.1	27.856	1.06e-35	59376000	110710000	39191000	69759000	52553000	60298000	41268000	51373000	0.736435	0.450204
L8ILK4;P60902;W5QIU9	>tr|L8ILK4|L8ILK4_9CETA Protein S100-A10 OS=Bos mutus GN=M91_14494 PE=3 SV=1;>sp|P60902|S10AA_BOVIN Protein S100-A10 OS=Bos taurus GN=S100A10 PE=1 SV=2;>tr|W5QIU9|W5QIU9_SHEEP Uncharacterized protein OS=Ovis aries GN=S100A10 PE=3 SV=1	3	4	4	4	35.1	11.203	1.13e-48	754900000	247110000	179990000	394000000	779230000	733350000	275810000	596130000	1.51302	0.451279
E1BDL2;L8IIU5;W5P5X2	>tr|E1BDL2|E1BDL2_BOVIN Uncharacterized protein OS=Bos taurus GN=TTC7A PE=4 SV=1;>tr|L8IIU5|L8IIU5_9CETA Tetratricopeptide repeat protein 7A (Fragment) OS=Bos mutus GN=M91_03780 PE=4 SV=1;>tr|W5P5X2|W5P5X2_SHEEP Uncharacterized protein OS=Ovis aries GN=TTC	3	12	12	12	17.5	95.882	2.12e-84	43253000	29223000	43235000	3.85703e+07	58246000	38840000	38618000	4.52347e+07	1.17278	0.45223
W5QAM4;Q2HJF7;A5D9F0;L8HKT4;W5QAM5;F1MVF1;L8I7W1;W5PET9;Q3MHJ9;W5PEU0;A4FV87;F1MG86;L8I8M3;Q08E45;W5PAI9;G3DQH1;W5Q2E7;Q9GLG6;G9BF92	>tr|W5QAM4|W5QAM4_SHEEP Uncharacterized protein OS=Ovis aries GN=CAMK2D PE=4 SV=1;>sp|Q2HJF7|KCC2D_BOVIN Calcium/calmodulin-dependent protein kinase type II subunit delta OS=Bos taurus GN=CAMK2D PE=2 SV=1;>tr|A5D9F0|A5D9F0_BOVIN Calcium/calmodulin-dependen	19	10	10	10	28.3	60.033	2.43e-146	107850000	143700000	41381000	9.76437e+07	86125000	75462000	52629000	7.14053e+07	0.731285	0.452519
G5E5C8;Q2TBL6;L8IKJ4;H9TKZ8;Q58DR3;B0FZM7;W5P7X3	>tr|G5E5C8|G5E5C8_BOVIN Transaldolase OS=Bos taurus GN=TALDO1 PE=1 SV=1;>sp|Q2TBL6|TALDO_BOVIN Transaldolase OS=Bos taurus GN=TALDO1 PE=2 SV=1;>tr|L8IKJ4|L8IKJ4_9CETA Transaldolase (Fragment) OS=Bos mutus GN=M91_06732 PE=4 SV=1	7	5	5	5	19.6	37.681	3.39e-27	73084000	59398000	35204000	5.58953e+07	54141000	50314000	29816000	44757000	0.800729	0.452717
W5P8Q0;Q08DS7;P63009;L8IBH1;G3X7G4;Q9TS83;Q9XSX0;Q9TS60	>tr|W5P8Q0|W5P8Q0_SHEEP AP complex subunit beta OS=Ovis aries GN=AP2B1 PE=3 SV=1;>sp|Q08DS7|AP1B1_BOVIN AP-1 complex subunit beta-1 OS=Bos taurus GN=AP2B1 PE=2 SV=1;>sp|P63009|AP2B1_BOVIN AP-2 complex subunit beta OS=Bos taurus GN=AP2B1 PE=1 SV=2;>tr|L8IBH	8	37	37	22	53.3	105.65	0	789370000	504480000	711280000	6.68377e+08	920800000	750260000	631600000	7.67553e+08	1.14838	0.453061
W5PJU6	>tr|W5PJU6|W5PJU6_SHEEP Uncharacterized protein OS=Ovis aries GN=FARSA PE=4 SV=1	1	7	7	1	17	60.936	4.77e-104	90924000	103740000	60489000	85051000	162720000	88264000	77933000	109639000	1.2891	0.453254
L8IG27;E1BKX7;W5PT68	>tr|L8IG27|L8IG27_9CETA Filamin-B OS=Bos mutus GN=M91_00830 PE=4 SV=1;>tr|E1BKX7|E1BKX7_BOVIN Uncharacterized protein OS=Bos taurus GN=FLNB PE=1 SV=2;>tr|W5PT68|W5PT68_SHEEP Uncharacterized protein OS=Ovis aries GN=FLNB PE=4 SV=1	3	79	69	67	39	281.61	0	990880000	708380000	304650000	667970000	1855000000	979380000	358370000	1064250000	1.59326	0.453345
P00125;W5Q0A9;L8IH71;Q7YRA7	>sp|P00125|CY1_BOVIN Cytochrome c1, heme protein, mitochondrial OS=Bos taurus GN=CYC1 PE=1 SV=2;>tr|W5Q0A9|W5Q0A9_SHEEP Uncharacterized protein OS=Ovis aries GN=CYC1 PE=1 SV=1;>tr|L8IH71|L8IH71_9CETA Cytochrome c1, heme protein, mitochondrial (Fragment) OS	4	3	3	3	10.8	35.296	1.64e-21	6755100	9884500	24322000	1.36539e+07	7132700	17282000	55710000	2.67082e+07	1.95609	0.453839
L8IE34;W5NU20;F1MHU9;A3KN43	>tr|L8IE34|L8IE34_9CETA CCR4-NOT transcription complex subunit 1 OS=Bos mutus GN=M91_00079 PE=4 SV=1;>tr|W5NU20|W5NU20_SHEEP Uncharacterized protein OS=Ovis aries GN=CNOT1 PE=4 SV=1;>tr|F1MHU9|F1MHU9_BOVIN Uncharacterized protein OS=Bos taurus GN=CNOT1 PE=	4	9	9	9	4.2	266.87	8.19e-47	5223500	5359700		5291600	50602000	3314600		26958300	5.09455	0.456205
A6H7G3;L8IHE9;W5Q3M8	>tr|A6H7G3|A6H7G3_BOVIN SC4MOL protein OS=Bos taurus GN=SC4MOL PE=2 SV=1;>tr|L8IHE9|L8IHE9_9CETA C-4 methylsterol oxidase OS=Bos mutus GN=M91_12095 PE=3 SV=1;>tr|W5Q3M8|W5Q3M8_SHEEP Uncharacterized protein OS=Ovis aries GN=MSMO1 PE=3 SV=1	3	1	1	1	4.8	35.06	4.85e-23	13830000	25265000		19547500	13999000	20523000	7958300	14160100	0.724394	0.45741
E1B9N7;L8J1B5	>tr|E1B9N7|E1B9N7_BOVIN Uncharacterized protein OS=Bos taurus GN=DHX29 PE=4 SV=1;>tr|L8J1B5|L8J1B5_9CETA ATP-dependent RNA helicase DHX29 OS=Bos mutus GN=M91_20214 PE=4 SV=1	2	2	2	1	1.2	155.25	0.00038612	13740000	11913000	12025000	1.25593e+07	9421100	13406000	11657000	11494700	0.915232	0.45749
L8I7K4;F1MVT1;W5Q801	>tr|L8I7K4|L8I7K4_9CETA Leucine-rich repeat transmembrane protein FLRT2 (Fragment) OS=Bos mutus GN=M91_18204 PE=4 SV=1;>tr|F1MVT1|F1MVT1_BOVIN Uncharacterized protein OS=Bos taurus GN=FLRT2 PE=4 SV=2;>tr|W5Q801|W5Q801_SHEEP Uncharacterized protein OS=Ovis	3	2	2	2	3.7	75.012	1.15e-08	9244100	15124000	11884000	1.2084e+07	11465000	18521000		14993000	1.24073	0.458146
L8IEK0;W5Q7T3;A2VE99;W5Q3M7;W5Q3M9;Q3SZN0	>tr|L8IEK0|L8IEK0_9CETA Septin-11 (Fragment) OS=Bos mutus GN=M91_16139 PE=3 SV=1;>tr|W5Q7T3|W5Q7T3_SHEEP Uncharacterized protein OS=Ovis aries GN=SEPT11 PE=3 SV=1;>sp|A2VE99|SEP11_BOVIN Septin-11 OS=Bos taurus GN=SEPT11 PE=2 SV=1	6	14	14	11	42.5	52.017	9.44e-221	285750000	242400000	167360000	2.31837e+08	418480000	244790000	211530000	291600000	1.25778	0.458303
L8IQV3;S5G966;D4P8H6;E1BB71;E1BII3;Q24JY1;W5PY38;W5QE39;F4YD24;L8IYY4;L8IIU8;L8IF91;L8HSN0;E1B983;L8I6T1;W5P7F5;W5Q8Y0;E1BED6;W5PCW0;W5PZY1	>tr|L8IQV3|L8IQV3_9CETA Uncharacterized protein OS=Bos mutus GN=M91_15908 PE=3 SV=1;>tr|S5G966|S5G966_BOVIN Ribosomal protein L23a Y-linked protein OS=Bos taurus GN=RPL23AY PE=2 SV=1;>tr|D4P8H6|D4P8H6_SHEEP Ribosomal protein L23a OS=Ovis aries GN=rpl23a PE	20	5	5	5	29.8	18.99	5.39e-15	181360000	329910000	136080000	2.15783e+08	428210000	420380000	100690000	3.16427e+08	1.46641	0.458317
W5P889	>tr|W5P889|W5P889_SHEEP Uncharacterized protein OS=Ovis aries GN=SEPT9 PE=3 SV=1	1	12	2	2	25.4	63.183	4.67e-79	31298000	33906000	24145000	29783000	24986000	27938000		26462000	0.888493	0.459559
A0A140T881;L8I9E0;P0DN41;Q03247;A7YWR0;Q0ZCB4;W5PI61;P0DN39;Q7M2U8;P0DN38	>tr|A0A140T881|A0A140T881_BOVIN Apolipoprotein E OS=Bos taurus GN=APOE PE=3 SV=1;>tr|L8I9E0|L8I9E0_9CETA Apolipoprotein E OS=Bos mutus GN=M91_05707 PE=3 SV=1;>sp|P0DN41|APOE_BOSMU Apolipoprotein E OS=Bos mutus grunniens GN=APOE PE=3 SV=1;>sp|Q03247|APOE_BO	10	12	12	12	44	36.039	5.94e-177	50259000	1036800000	268380000	451813000	173400000	74416000		123908000	0.274246	0.460134
A7Z024;L8IDS1;W5PX03;W5PX05;Q58DV1	>tr|A7Z024|A7Z024_BOVIN Protein XRP2 OS=Bos taurus GN=RP2 PE=2 SV=1;>tr|L8IDS1|L8IDS1_9CETA Protein XRP2 OS=Bos mutus GN=M91_21213 PE=3 SV=1;>tr|W5PX03|W5PX03_SHEEP Protein XRP2 OS=Ovis aries GN=RP2 PE=3 SV=1;>tr|W5PX05|W5PX05_SHEEP Uncharacterized protein	5	3	3	3	8.6	39.459	1.25e-06	18699000		6443700	12571350	2590900	9712400		6151650	0.489339	0.460637
W5PTY2;L8IVD7;Q1RMW0	>tr|W5PTY2|W5PTY2_SHEEP Phospholipid scramblase OS=Ovis aries GN=TMEM256-PLSCR3 PE=3 SV=1;>tr|L8IVD7|L8IVD7_9CETA Phospholipid scramblase (Fragment) OS=Bos mutus GN=M91_13044 PE=3 SV=1;>tr|Q1RMW0|Q1RMW0_BOVIN Phospholipid scramblase OS=Bos taurus GN=PLSCR3	3	4	4	4	14.4	36.2	3.09e-29	160230000	75297000	140850000	125459000	42152000	108040000	134410000	9.48673e+07	0.756162	0.461419
E1BFB4;B9VXW5;W5NXN8;D9I5T4	>tr|E1BFB4|E1BFB4_BOVIN Uncharacterized protein OS=Bos taurus GN=MTOR PE=3 SV=2;>tr|B9VXW5|B9VXW5_SHEEP Mammalian target of rapamycin OS=Ovis aries PE=2 SV=1;>tr|W5NXN8|W5NXN8_SHEEP Uncharacterized protein OS=Ovis aries GN=MTOR PE=3 SV=1;>tr|D9I5T4|D9I5T4_	4	2	2	2	0.9	289.08	0.00019016	8163000		33655000	20909000		7706600	10920000	9313300	0.445421	0.461999
Q3T0D0;W5PGN1;L8IHL7;W5Q2G6;D5K776;W5P9L9;W5PYF6;W5PYJ1;W5PZZ7	>sp|Q3T0D0|HNRPK_BOVIN Heterogeneous nuclear ribonucleoprotein K OS=Bos taurus GN=HNRNPK PE=2 SV=1;>tr|W5PGN1|W5PGN1_SHEEP Uncharacterized protein OS=Ovis aries GN=LOC101113221 PE=4 SV=1;>tr|L8IHL7|L8IHL7_9CETA Heterogeneous nuclear ribonucleoprotein K OS=	9	19	19	19	55	51.019	4.96e-217	346550000	326440000	180060000	284350000	498190000	458610000	175030000	3.77277e+08	1.3268	0.462546
Q6RWT6;E1BH15;Q6VAN8;Q6RWT5;Q6VAN7	>tr|Q6RWT6|Q6RWT6_BOVIN Carcinoembryonic antigen-related cell adhesion molecule 1 isoform 3L OS=Bos taurus GN=CEACAM1 PE=2 SV=1;>tr|E1BH15|E1BH15_BOVIN Uncharacterized protein OS=Bos taurus GN=CEACAM1 PE=4 SV=2;>tr|Q6VAN8|Q6VAN8_BOVIN Carcinoembryonic anti	5	1	1	1	3.9	48.241	6.26e-14	13002000	2372500		7687250	97723000	3238800		50480900	6.56683	0.463038
L8IHS5;E1BPL8	>tr|L8IHS5|L8IHS5_9CETA Neprilysin OS=Bos mutus GN=M91_16167 PE=4 SV=1;>tr|E1BPL8|E1BPL8_BOVIN Uncharacterized protein OS=Bos taurus GN=MME PE=4 SV=1	2	20	20	1	34.5	85.884	4.82e-263	113750000	248450000	211610000	191270000	776380000	276220000	50663000	3.67754e+08	1.9227	0.463926
L8I351;A2VE31;W5QDX9	>tr|L8I351|L8I351_9CETA Sodium-coupled neutral amino acid transporter 2 (Fragment) OS=Bos mutus GN=M91_02050 PE=4 SV=1;>sp|A2VE31|S38A2_BOVIN Sodium-coupled neutral amino acid transporter 2 OS=Bos taurus GN=SLC38A2 PE=2 SV=1;>tr|W5QDX9|W5QDX9_SHEEP Unchara	3	3	3	3	6.9	57.553	1.67e-26	44203000	35618000	101050000	6.02903e+07	402170000	16747000	61289000	1.60069e+08	2.65496	0.464276
L8INM5;Q3T0D8;W5P164	>tr|L8INM5|L8INM5_9CETA Uncharacterized protein OS=Bos mutus GN=M91_03526 PE=4 SV=1;>sp|Q3T0D8|LTOR1_BOVIN Ragulator complex protein LAMTOR1 OS=Bos taurus GN=LAMTOR1 PE=2 SV=1;>tr|W5P164|W5P164_SHEEP Uncharacterized protein OS=Ovis aries GN=LAMTOR1 PE=4 SV	3	5	5	5	37.9	17.731	1.49e-56	93830000	61745000	91955000	82510000	66699000	84622000	200700000	1.1734e+08	1.42213	0.465944
W5NXU9;F1MWN2;L8J3S9;W5NXU7;W5PZG6;D4QGC1;D6RVQ8;F1N261;L8IWY1;C5ISA0;F1MTD8;Q38KH2	>tr|W5NXU9|W5NXU9_SHEEP Tyrosine-protein kinase OS=Ovis aries GN=HCK PE=3 SV=1;>tr|F1MWN2|F1MWN2_BOVIN Tyrosine-protein kinase OS=Bos taurus GN=HCK PE=3 SV=1;>tr|L8J3S9|L8J3S9_9CETA Tyrosine-protein kinase (Fragment) OS=Bos mutus GN=M91_18100 PE=3 SV=1;>tr	12	7	5	5	14.8	59.719	3.17e-13	10604000	10448000	12323000	11125000	10638000	10561000	19374000	1.35243e+07	1.21567	0.466699
G1DGF5;L8I094;L8IZS1;Q29RQ9;Q5E972;W5PNA8;W5Q476	>tr|G1DGF5|G1DGF5_CAPHI ORM1-like protein 1 OS=Capra hircus GN=ORMDL1 PE=2 SV=1;>tr|L8I094|L8I094_9CETA ORM1-like protein 2 OS=Bos mutus GN=M91_07264 PE=4 SV=1;>tr|L8IZS1|L8IZS1_9CETA ORM1-like protein 1 OS=Bos mutus GN=M91_12667 PE=4 SV=1;>sp|Q29RQ9|ORML1	7	2	2	1	17	17.317	1.92e-26	14767000	13476000	19581000	1.59413e+07	27121000	15374000	15668000	1.93877e+07	1.21619	0.466856
Q29626;L8IBN3;W5PT40	>sp|Q29626|PTGIS_BOVIN Prostacyclin synthase OS=Bos taurus GN=PTGIS PE=1 SV=1;>tr|L8IBN3|L8IBN3_9CETA Prostacyclin synthase (Fragment) OS=Bos mutus GN=M91_17010 PE=3 SV=1;>tr|W5PT40|W5PT40_SHEEP Uncharacterized protein OS=Ovis aries GN=PTGIS PE=3 SV=1	3	7	7	7	24.2	56.629	3.14e-55	119260000	38909000	73539000	77236000	38466000	65535000	67305000	57102000	0.739318	0.466926
Q8HXQ5;F1MY01;L8I3S1	>sp|Q8HXQ5|MRP1_BOVIN Multidrug resistance-associated protein 1 OS=Bos taurus GN=ABCC1 PE=2 SV=1;>tr|F1MY01|F1MY01_BOVIN Multidrug resistance-associated protein 1 OS=Bos taurus GN=ABCC1 PE=4 SV=2;>tr|L8I3S1|L8I3S1_9CETA Multidrug resistance-associated prot	3	18	18	4	13.6	171.66	2.99e-69	97471000	113530000	211130000	1.4071e+08	80119000	155180000	82798000	1.06032e+08	0.75355	0.467055
L8HXW6;G3N0V2	>tr|L8HXW6|L8HXW6_9CETA Keratin, type II cytoskeletal 1 (Fragment) OS=Bos mutus GN=M91_10648 PE=3 SV=1;>tr|G3N0V2|G3N0V2_BOVIN Uncharacterized protein OS=Bos taurus GN=KRT1 PE=1 SV=1	2	16	12	4	23.1	66.485	1.81e-267	2761900000	1934500000	4760300000	3.15223e+09	1225700000	3980800000	13207000000	6.13783e+09	1.94714	0.467058
A6H797;W5PTS8;L8IS73	>tr|A6H797|A6H797_BOVIN MLEC protein OS=Bos taurus GN=MLEC PE=1 SV=1;>tr|W5PTS8|W5PTS8_SHEEP Uncharacterized protein OS=Ovis aries GN=MLEC PE=4 SV=1;>tr|L8IS73|L8IS73_9CETA Malectin OS=Bos mutus GN=M91_08090 PE=4 SV=1	3	6	6	6	19.8	31.566	4.26e-78	107160000	53325000	109490000	8.99917e+07	26636000	46127000	117440000	63401000	0.704521	0.467303
W5PEL1;L8I3W9;Q5E9A1;W5PR74;W5PIQ0;W5P3X0	>tr|W5PEL1|W5PEL1_SHEEP Uncharacterized protein OS=Ovis aries GN=NACA PE=4 SV=1;>tr|L8I3W9|L8I3W9_9CETA Nascent polypeptide-associated complex subunit alpha, muscle-specific form (Fragment) OS=Bos mutus GN=M91_19750 PE=4 SV=1;>sp|Q5E9A1|NACA_BOVIN Nascent	6	4	4	4	2.9	187.85	2.43e-75	39955000	23622000	29748000	3.11083e+07	110000000	38765000	14484000	5.44163e+07	1.74925	0.467392
W5PXV4;G3MWI1;W5PXV9;A5PK04;F1MCB5	>tr|W5PXV4|W5PXV4_SHEEP Anion exchange protein OS=Ovis aries GN=SLC4A7 PE=3 SV=1;>tr|G3MWI1|G3MWI1_BOVIN Anion exchange protein OS=Bos taurus GN=SLC4A7 PE=3 SV=1;>tr|W5PXV9|W5PXV9_SHEEP Anion exchange protein OS=Ovis aries GN=SLC4A7 PE=3 SV=1;>tr|A5PK04|A5	5	3	3	3	3.7	136.33	8.22e-12	13781000	11481000		12631000	11811000	11367000		11589000	0.917505	0.467516
L8HZA6;G8JKY2;Q5E9J5;W5NTE1	>tr|L8HZA6|L8HZA6_9CETA 7-dehydrocholesterol reductase OS=Bos mutus GN=M91_12113 PE=4 SV=1;>tr|G8JKY2|G8JKY2_BOVIN 7-dehydrocholesterol reductase OS=Bos taurus GN=DHCR7 PE=4 SV=1;>sp|Q5E9J5|DHCR7_BOVIN 7-dehydrocholesterol reductase OS=Bos taurus GN=DHCR7	4	4	4	4	7.8	54.32	9.76e-12	24823000	42913000	55277000	4.10043e+07	23131000	43487000	30777000	32465000	0.791746	0.467622
L8IPS1;Q2HJH2;W5P010;G3MYN4;Q1RMR4;W5QJ39	>tr|L8IPS1|L8IPS1_9CETA Ras-related protein Rab-1B OS=Bos mutus GN=M91_15905 PE=4 SV=1;>sp|Q2HJH2|RAB1B_BOVIN Ras-related protein Rab-1B OS=Bos taurus GN=RAB1B PE=2 SV=1;>tr|W5P010|W5P010_SHEEP Uncharacterized protein OS=Ovis aries PE=4 SV=1;>tr|G3MYN4|G3M	6	12	5	5	63.7	22.202	3.06e-74	158230000	105090000	45223000	1.02848e+08	99563000	34992000	83053000	72536000	0.705276	0.46924
W5NVV8;Q5E9E7;L8IDX1	>tr|W5NVV8|W5NVV8_SHEEP Uncharacterized protein OS=Ovis aries GN=GLT8D1 PE=4 SV=1;>sp|Q5E9E7|GL8D1_BOVIN Glycosyltransferase 8 domain-containing protein 1 OS=Bos taurus GN=GLT8D1 PE=2 SV=1;>tr|L8IDX1|L8IDX1_9CETA Glycosyltransferase 8 domain-containing pro	3	3	3	3	8.3	41.994	8.5e-07		9278500	30486000	19882250	5429300		14105000	9767150	0.49125	0.470427
A0A1B2VWD4;Q17QQ1;W5PXD7;L8HQT1	>tr|A0A1B2VWD4|A0A1B2VWD4_CAPHI Late endosomal/lysosomal adaptor MAPK and MTOR activator 3 OS=Capra hircus GN=LAMTOR3 PE=2 SV=1;>sp|Q17QQ1|LTOR3_BOVIN Ragulator complex protein LAMTOR3 OS=Bos taurus GN=LAMTOR3 PE=2 SV=1;>tr|W5PXD7|W5PXD7_SHEEP Uncharacteri	4	4	4	4	30.6	13.65	2.12e-45	85447000	34052000	70961000	6.34867e+07	57360000	71767000	118720000	8.26157e+07	1.30131	0.470513
G3MXC8;I6WKU6;Q3SYX9;W5NVB9	>tr|G3MXC8|G3MXC8_BOVIN Actin-related protein 2/3 complex subunit 5 OS=Bos taurus GN=ARPC5 PE=3 SV=1;>tr|I6WKU6|I6WKU6_CAPHI Actin-related protein 2/3 complex subunit 5 OS=Capra hircus GN=ARPC5 PE=2 SV=1;>sp|Q3SYX9|ARPC5_BOVIN Actin-related protein 2/3 com	4	6	6	6	57	16.288	7.88e-55	94423000	75836000	55767000	75342000	176170000	99845000	44762000	1.06926e+08	1.4192	0.470835
L8HN38;Q3ZBA6;W5QH58	>tr|L8HN38|L8HN38_9CETA DnaJ-like protein subfamily B member 11 OS=Bos mutus GN=M91_05076 PE=4 SV=1;>sp|Q3ZBA6|DJB11_BOVIN DnaJ homolog subfamily B member 11 OS=Bos taurus GN=DNAJB11 PE=2 SV=1;>tr|W5QH58|W5QH58_SHEEP Uncharacterized protein OS=Ovis aries G	3	8	8	8	29.9	40.503	6.73e-51	123240000	113180000	223360000	153260000	70013000	84565000	185050000	1.13209e+08	0.738675	0.47168
L8I779;Q3T171;W5PBV8;W5Q496;G3N2X2;G3MYF8	>tr|L8I779|L8I779_9CETA 60S ribosomal protein L36 OS=Bos mutus GN=M91_12948 PE=3 SV=1;>sp|Q3T171|RL36_BOVIN 60S ribosomal protein L36 OS=Bos taurus GN=RPL36 PE=3 SV=3;>tr|W5PBV8|W5PBV8_SHEEP 60S ribosomal protein L36 OS=Ovis aries GN=RPL36 PE=3 SV=1;>tr|W5	6	4	4	4	29.5	12.224	3.98e-41	222460000	282410000	148980000	217950000	388440000	345140000	130940000	2.88173e+08	1.3222	0.471732
W5P375;G5E531;L8IA13;Q32L40;B0LRN7	>tr|W5P375|W5P375_SHEEP Uncharacterized protein OS=Ovis aries GN=TCP1 PE=3 SV=1;>tr|G5E531|G5E531_BOVIN T-complex protein 1 subunit alpha OS=Bos taurus GN=TCP1 PE=3 SV=1;>tr|L8IA13|L8IA13_9CETA T-complex protein 1 subunit alpha OS=Bos mutus GN=M91_06280 PE	5	26	26	26	53.4	60.521	7.57e-151	739310000	862450000	600710000	7.34157e+08	855520000	618370000	314620000	596170000	0.812047	0.471764
A3KMV5;L8IE61;Q9N1X9;O77800	>sp|A3KMV5|UBA1_BOVIN Ubiquitin-like modifier-activating enzyme 1 OS=Bos taurus GN=UBA1 PE=2 SV=1;>tr|L8IE61|L8IE61_9CETA Ubiquitin-like modifier-activating enzyme 1 OS=Bos mutus GN=M91_07843 PE=3 SV=1	4	14	14	2	17.3	117.83	4.23e-84	87569000	136440000	52091000	9.20333e+07	72870000	58747000		65808500	0.715051	0.472565
C5IJ90;Q0VD29;L8IRP9;W5QFD0;W5PNE1	>tr|C5IJ90|C5IJ90_SHEEP RRAGC OS=Ovis aries PE=2 SV=1;>tr|Q0VD29|Q0VD29_BOVIN Ras-related GTP binding C OS=Bos taurus GN=RRAGC PE=2 SV=1;>tr|L8IRP9|L8IRP9_9CETA Ras-related GTP-binding protein C (Fragment) OS=Bos mutus GN=M91_09533 PE=4 SV=1;>tr|W5QFD0|W5Q	5	6	6	1	16	44.251	6.43e-17	19787000	18938000	28557000	2.24273e+07	25768000	18172000	40492000	28144000	1.2549	0.473787
A6QR14;L8HYZ3;W5PC78;W5PC80	>tr|A6QR14|A6QR14_BOVIN DHCR24 protein OS=Bos taurus GN=DHCR24 PE=2 SV=1;>tr|L8HYZ3|L8HYZ3_9CETA 24-dehydrocholesterol reductase OS=Bos mutus GN=M91_14955 PE=4 SV=1;>tr|W5PC78|W5PC78_SHEEP Uncharacterized protein OS=Ovis aries GN=DHCR24 PE=4 SV=1;>tr|W5PC8	4	6	6	6	12.6	60.173	1.56e-19	20542000	26159000	64851000	37184000	25376000	31197000	21284000	2.59523e+07	0.697944	0.473863
B3VSB9;F1N026;L8HVH0;Q3T0P7	>tr|B3VSB9|B3VSB9_SHEEP ITM2B OS=Ovis aries GN=ITM2B PE=2 SV=1;>tr|F1N026|F1N026_BOVIN Integral membrane protein 2B OS=Bos taurus GN=ITM2B PE=4 SV=1;>tr|L8HVH0|L8HVH0_9CETA Integral membrane protein 2B OS=Bos mutus GN=M91_12560 PE=4 SV=1;>sp|Q3T0P7|ITM2B_B	4	6	6	6	34.6	30.306	6.2e-57	53202000	280800000	167320000	1.67107e+08	180010000	65676000	78340000	1.08009e+08	0.646343	0.474821
E1BDM8;L8IJT5;W5PPA7	>tr|E1BDM8|E1BDM8_BOVIN Uncharacterized protein OS=Bos taurus GN=DDX6 PE=1 SV=1;>tr|L8IJT5|L8IJT5_9CETA Putative ATP-dependent RNA helicase DDX6 OS=Bos mutus GN=M91_09727 PE=3 SV=1;>tr|W5PPA7|W5PPA7_SHEEP Uncharacterized protein OS=Ovis aries GN=DDX6 PE=4	3	6	6	6	17	54.376	6.88e-24	9099600	8727600		8913600	62291000	5231900		33761450	3.78763	0.47562
W5PED4	>tr|W5PED4|W5PED4_SHEEP Uncharacterized protein OS=Ovis aries GN=CD99 PE=4 SV=1	1	1	1	1	7.4	19.558	2.51e-32	163150000	321950000	183880000	2.22993e+08	445280000	273700000	170830000	2.96603e+08	1.3301	0.478642
B1PK18;W5Q5V0;F1MZP0;L8I5V7	>tr|B1PK18|B1PK18_BOVIN 1,4-alpha-glucan branching enzyme 1 OS=Bos taurus PE=2 SV=1;>tr|W5Q5V0|W5Q5V0_SHEEP Uncharacterized protein OS=Ovis aries GN=GBE1 PE=4 SV=1;>tr|F1MZP0|F1MZP0_BOVIN Uncharacterized protein OS=Bos taurus GN=GBE1 PE=4 SV=2	4	5	5	5	8.5	80.977	2.75e-10	13819000	34229000	10732000	1.95933e+07		12209000	11616000	11912500	0.607987	0.478793
L8I9F5;Q56JX3;W5PUU0;G3MX45;L8HMU3;W5Q9Q3;G3N023	>tr|L8I9F5|L8I9F5_9CETA 60S ribosomal protein L31 OS=Bos mutus GN=M91_20459 PE=4 SV=1;>sp|Q56JX3|RL31_BOVIN 60S ribosomal protein L31 OS=Bos taurus GN=RPL31 PE=2 SV=1;>tr|W5PUU0|W5PUU0_SHEEP Uncharacterized protein OS=Ovis aries GN=RPL31 PE=4 SV=1;>tr|G3MX	7	7	7	7	52	14.463	6.03e-23	218360000	149170000	60278000	1.42603e+08	255400000	308390000	66488000	2.10093e+08	1.47327	0.478861
L8ICB8;A7MB21;W5QIT6;W5QIT7;Q32PC0	>tr|L8ICB8|L8ICB8_9CETA Fermitin family-like protein 2 OS=Bos mutus GN=M91_06431 PE=4 SV=1;>tr|A7MB21|A7MB21_BOVIN FERMT2 protein OS=Bos taurus GN=FERMT2 PE=1 SV=1;>tr|W5QIT6|W5QIT6_SHEEP Uncharacterized protein OS=Ovis aries GN=FERMT2 PE=4 SV=1;>tr|W5QIT7	5	20	20	20	42.5	78.688	7.84e-265	480240000	740470000	478200000	5.66303e+08	615080000	1044800000	483970000	7.14617e+08	1.2619	0.479626
Q3T104;W5PP18;L8HSS6	>sp|Q3T104|SC61G_BOVIN Protein transport protein Sec61 subunit gamma OS=Bos taurus GN=SEC61G PE=3 SV=1;>tr|W5PP18|W5PP18_SHEEP Uncharacterized protein OS=Ovis aries GN=SEC61G PE=3 SV=1;>tr|L8HSS6|L8HSS6_9CETA Protein transport protein Sec61 subunit gamma O	3	2	2	2	36.8	7.7412	4.45e-28	116950000	67451000	261470000	1.48624e+08	21700000	98737000	160350000	9.35957e+07	0.629749	0.479758
W5P1A5;L8IGM7;G9BHQ1;G9BHQ2	>tr|W5P1A5|W5P1A5_SHEEP Glucosylceramidase OS=Ovis aries GN=GBA PE=3 SV=1;>tr|L8IGM7|L8IGM7_9CETA Glucosylceramidase OS=Bos mutus GN=M91_20870 PE=3 SV=1	4	8	8	1	21.6	59.943	2.94e-120	192680000	67875000	293140000	184565000	142250000	204170000	517200000	2.87873e+08	1.55974	0.480948
L8IIF1;Q05588;C6GBR4	>tr|L8IIF1|L8IIF1_9CETA Urokinase plasminogen activator surface receptor OS=Bos mutus GN=M91_20284 PE=4 SV=1;>sp|Q05588|UPAR_BOVIN Urokinase plasminogen activator surface receptor OS=Bos taurus GN=PLAUR PE=2 SV=1;>tr|C6GBR4|C6GBR4_SHEEP Urokinase plasminog	3	1	1	1	3.9	36.057	3.1e-21	9770000		11118000	10444000		16943000	10003000	13473000	1.29002	0.481788
Q3MHR5;L8HUB1	>sp|Q3MHR5|SRSF2_BOVIN Serine/arginine-rich splicing factor 2 OS=Bos taurus GN=SRSF2 PE=2 SV=3;>tr|L8HUB1|L8HUB1_9CETA Serine/arginine-rich splicing factor 2 (Fragment) OS=Bos mutus GN=M91_06705 PE=4 SV=1	2	6	6	6	30.3	25.476	4.91e-67	91518000	57549000	42547000	6.38713e+07	130110000	85821000	43061000	8.63307e+07	1.35163	0.481979
W5QBF5;L8ITS2;P34942;Q3SZE6;G5E543	>tr|W5QBF5|W5QBF5_SHEEP NADH dehydrogenase [ubiquinone] 1 alpha subcomplex subunit 10, mitochondrial OS=Ovis aries GN=NDUFA10 PE=1 SV=1;>tr|L8ITS2|L8ITS2_9CETA NADH dehydrogenase [ubiquinone] 1 alpha subcomplex subunit 10, mitochondrial OS=Bos mutus GN=M91	5	2	2	2	9.3	40.422	2.27e-21	12372000		25303000	18837500	6916500		16848000	11882250	0.630776	0.483446
E1BG63;W5Q1X1;L8HPW7	>tr|E1BG63|E1BG63_BOVIN Uncharacterized protein OS=Bos taurus GN=TMTC3 PE=4 SV=2;>tr|W5Q1X1|W5Q1X1_SHEEP Uncharacterized protein OS=Ovis aries GN=TMTC3 PE=4 SV=1;>tr|L8HPW7|L8HPW7_9CETA Transmembrane and TPR repeat-containing protein 3 OS=Bos mutus GN=M91_	3	3	3	3	3.8	104.46	8.55e-21	31082000	156530000	34281000	7.39643e+07		25922000	36936000	31429000	0.424921	0.484429
A7MBI5;L8I9W8;W5P0A4;E1BER6;W5P8V7;L8I4A9;W5Q252;L8IM64;E1BFN6	>tr|A7MBI5|A7MBI5_BOVIN DPYSL3 protein OS=Bos taurus GN=DPYSL3 PE=1 SV=1;>tr|L8I9W8|L8I9W8_9CETA Dihydropyrimidinase-related protein 3 OS=Bos mutus GN=M91_06419 PE=4 SV=1;>tr|W5P0A4|W5P0A4_SHEEP Uncharacterized protein OS=Ovis aries GN=DPYSL3 PE=4 SV=1	9	14	14	12	27.9	73.987	8.8e-71	66564000	35633000	23355000	4.18507e+07	34345000	28188000	33091000	3.18747e+07	0.761629	0.485375
L8IZA9;Q1LZC3;W5PTK5	>tr|L8IZA9|L8IZA9_9CETA Nicalin OS=Bos mutus GN=M91_18641 PE=3 SV=1;>tr|Q1LZC3|Q1LZC3_BOVIN Nicalin OS=Bos taurus GN=NCLN PE=2 SV=1;>tr|W5PTK5|W5PTK5_SHEEP Nicalin OS=Ovis aries GN=NCLN PE=3 SV=1	3	7	7	7	14.1	63.092	2.3e-53	52175000	22593000	117720000	6.41627e+07	10746000	21466000	79271000	37161000	0.579169	0.486435
L8IX64;Q32L10	>tr|L8IX64|L8IX64_9CETA Transmembrane protein 205 OS=Bos mutus GN=M91_04904 PE=4 SV=1;>sp|Q32L10|TM205_BOVIN Transmembrane protein 205 OS=Bos taurus GN=TMEM205 PE=2 SV=1	2	1	1	1	10.6	20.97	1.2e-23	20464000	45237000	29237000	31646000	25666000	25412000	112360000	5.44793e+07	1.72152	0.486745
E1BJ31;W5PS60	>tr|E1BJ31|E1BJ31_BOVIN Uncharacterized protein OS=Bos taurus GN=EPHA2 PE=3 SV=1;>tr|W5PS60|W5PS60_SHEEP Uncharacterized protein OS=Ovis aries GN=EPHA2 PE=3 SV=1	2	12	10	10	15	107.92	1.05e-46	41987000	82356000	59983000	61442000	58173000	62644000	26203000	4.90067e+07	0.797609	0.489797
L8IR93;Q3ZBL5;W5P154	>tr|L8IR93|L8IR93_9CETA Peptidyl-tRNA hydrolase 2, mitochondrial (Fragment) OS=Bos mutus GN=M91_15748 PE=4 SV=1;>sp|Q3ZBL5|PTH2_BOVIN Peptidyl-tRNA hydrolase 2, mitochondrial OS=Bos taurus GN=PTRH2 PE=2 SV=1;>tr|W5P154|W5P154_SHEEP Uncharacterized protein	3	2	2	2	16.7	19.418	1.01e-25	29110000	31453000	41174000	3.39123e+07		29687000	30645000	30166000	0.889529	0.490484
L8IXN4;Q3T030;W5P8Z3;F1MG70;Q9TS78	>tr|L8IXN4|L8IXN4_9CETA 26S protease regulatory subunit 6B OS=Bos mutus GN=M91_07104 PE=3 SV=1;>sp|Q3T030|PRS6B_BOVIN 26S protease regulatory subunit 6B OS=Bos taurus GN=PSMC4 PE=2 SV=1;>tr|W5P8Z3|W5P8Z3_SHEEP Uncharacterized protein OS=Ovis aries GN=PSMC4	5	5	5	5	15.6	47.366	5.63e-27	13992000	13527000		13759500	14699000	3128900		8913950	0.64784	0.490706
L8HPK7;A8D8X1;Q9XSI3;G8JKX9;L8IXX8;Q2TBW8;W5NRP9;W5Q482;Q58DU2;W5QCQ6;L8IUN3;W5QC16;A1XEA9;A1XED2	>tr|L8HPK7|L8HPK7_9CETA 60S ribosomal protein L10 (Fragment) OS=Bos mutus GN=M91_03479 PE=4 SV=1;>sp|A8D8X1|RL10_SHEEP 60S ribosomal protein L10 OS=Ovis aries GN=RPL10 PE=2 SV=1;>sp|Q9XSI3|RL10_BOVIN 60S ribosomal protein L10 OS=Bos taurus GN=RPL10 PE=2 SV	14	7	7	7	32.3	24.83	5.51e-22	302750000	285070000	155430000	247750000	526080000	425720000	101380000	351060000	1.41699	0.490715
A6QLS9;L8IJA2;W5QAY5;C5IJ84	>tr|A6QLS9|A6QLS9_BOVIN RAB10 protein OS=Bos taurus GN=RAB10 PE=1 SV=1;>tr|L8IJA2|L8IJA2_9CETA Ras-related protein Rab-10 OS=Bos mutus GN=M91_00143 PE=4 SV=1;>tr|W5QAY5|W5QAY5_SHEEP Uncharacterized protein OS=Ovis aries GN=RAB10 PE=4 SV=1;>tr|C5IJ84|C5IJ84	4	7	6	5	38.5	22.541	1.76e-49	252220000	189540000	341070000	2.60943e+08	210700000	353590000	371270000	3.11853e+08	1.1951	0.490906
W5Q8Q7;Q3SZI6;L8IIR2;Q307G2	>tr|W5Q8Q7|W5Q8Q7_SHEEP Uncharacterized protein OS=Ovis aries GN=RPN2 PE=4 SV=1;>sp|Q3SZI6|RPN2_BOVIN Dolichyl-diphosphooligosaccharide--protein glycosyltransferase subunit 2 OS=Bos taurus GN=RPN2 PE=2 SV=1;>tr|L8IIR2|L8IIR2_9CETA Dolichyl-diphosphooligosa	4	17	17	17	36.9	70.601	0	1381300000	881570000	1899600000	1387490000	474870000	865430000	1741100000	1.02713e+09	0.740282	0.491117
E1BB48;W5NYS0;L8HM86;A7YY74;L8HXT1;F1MWE8;W5QEI6;L8IPG2	>tr|E1BB48|E1BB48_BOVIN Polypeptide N-acetylgalactosaminyltransferase OS=Bos taurus GN=GALNT2 PE=3 SV=2;>tr|W5NYS0|W5NYS0_SHEEP Polypeptide N-acetylgalactosaminyltransferase OS=Ovis aries GN=GALNT2 PE=3 SV=1;>tr|L8HM86|L8HM86_9CETA Polypeptide N-acetylgala	8	9	9	9	17.2	64.757	3.59e-26	52922000	37692000	244790000	1.11801e+08	26016000	51661000	98876000	58851000	0.526389	0.491336
Q3ZCI4;L8ISW4;Q862J6	>tr|Q3ZCI4|Q3ZCI4_BOVIN 6-phosphogluconate dehydrogenase, decarboxylating OS=Bos taurus GN=PGD PE=1 SV=2;>tr|L8ISW4|L8ISW4_9CETA 6-phosphogluconate dehydrogenase, decarboxylating (Fragment) OS=Bos mutus GN=M91_12838 PE=3 SV=1	3	8	2	2	21.1	53.076	6.32e-91	62662000	107310000	41717000	70563000	60826000	56441000	50097000	55788000	0.790613	0.49273
W5PLS4;F1MHD7;L8IPT0	>tr|W5PLS4|W5PLS4_SHEEP Protein YIPF OS=Ovis aries GN=YIPF4 PE=3 SV=1;>tr|F1MHD7|F1MHD7_BOVIN Protein YIPF OS=Bos taurus GN=YIPF4 PE=3 SV=2;>tr|L8IPT0|L8IPT0_9CETA Protein YIPF (Fragment) OS=Bos mutus GN=M91_20399 PE=3 SV=1	3	2	2	2	7.6	26.207	6.77e-05	6505600	8393000	8706900	7868500	7025900	7960000	6888300	7291400	0.926657	0.492841
B6EBS6;B9VR86;L8IT35;Q2YDE4;W5PC09;G5E5C3	>tr|B6EBS6|B6EBS6_SHEEP Proteasome subunit alpha type OS=Ovis aries GN=PSMA6 PE=2 SV=1;>tr|B9VR86|B9VR86_CAPHI Proteasome subunit alpha type OS=Capra hircus GN=PSMA6 PE=2 SV=1;>tr|L8IT35|L8IT35_9CETA Proteasome subunit alpha type OS=Bos mutus GN=M91_01758	6	5	5	5	25.2	27.372	5.69e-27	55105000	16258000		35681500	23178000	15289000		19233500	0.539033	0.493896
W5P181;L8IME5;Q17QG2	>tr|W5P181|W5P181_SHEEP Uncharacterized protein OS=Ovis aries GN=NUDC PE=4 SV=1;>tr|L8IME5|L8IME5_9CETA Nuclear migration protein nudC (Fragment) OS=Bos mutus GN=M91_13419 PE=4 SV=1;>sp|Q17QG2|NUDC_BOVIN Nuclear migration protein nudC OS=Bos taurus GN=NUDC	3	5	5	5	18.4	38.218	6.49e-13	16011000	20838000	40085000	2.56447e+07	29736000	15696000	10449000	18627000	0.72635	0.49419
W5PS90;F1ME41;L8IMJ3;P61285;Q862K7;W5PEV7;E1B7A3;G3MX54;L8HLD3;Q3MHR3;G1DGE3	>tr|W5PS90|W5PS90_SHEEP Uncharacterized protein OS=Ovis aries GN=DYNLL1 PE=4 SV=1;>tr|F1ME41|F1ME41_BOVIN Uncharacterized protein OS=Bos taurus GN=LOC101902172 PE=4 SV=1;>tr|L8IMJ3|L8IMJ3_9CETA Uncharacterized protein OS=Bos mutus GN=M91_12790 PE=4 SV=1;>s	11	2	2	2	36.3	10.566	1.56e-64	16668000	29780000	26626000	24358000	18930000	21711000		20320500	0.834243	0.494492
Q5E980;W5Q9U4;L8I4F9;G1DGG8;Q32KS8	>sp|Q5E980|CP20A_BOVIN Cytochrome P450 20A1 OS=Bos taurus GN=CYP20A1 PE=2 SV=1;>tr|W5Q9U4|W5Q9U4_SHEEP Uncharacterized protein OS=Ovis aries GN=CYP20A1 PE=4 SV=1;>tr|L8I4F9|L8I4F9_9CETA Cytochrome P450 20A1 OS=Bos mutus GN=M91_06409 PE=4 SV=1;>tr|G1DGG8|G1	5	12	12	12	29.4	52.673	5.47e-63	212230000	111640000	259770000	1.94547e+08	94047000	99026000	243190000	145421000	0.747486	0.495342
L8IVD8;Q2HJ38;Q7YRL2;Q8HYX4	>tr|L8IVD8|L8IVD8_9CETA Calponin OS=Bos mutus GN=M91_04893 PE=3 SV=1;>sp|Q2HJ38|CNN1_BOVIN Calponin-1 OS=Bos taurus GN=CNN1 PE=2 SV=1;>sp|Q7YRL2|CNN1_SHEEP Calponin-1 OS=Ovis aries GN=CNN1 PE=2 SV=1	4	3	3	3	12.8	33.282	2.62e-27	31804000	17540000		24672000		21672000	66084000	43878000	1.77845	0.496807
L8IDH9;A6QLY7;W5NYT2	>tr|L8IDH9|L8IDH9_9CETA Pre-B-cell leukemia transcription factor-interacting protein 1 OS=Bos mutus GN=M91_20850 PE=4 SV=1;>sp|A6QLY7|PBIP1_BOVIN Pre-B-cell leukemia transcription factor-interacting protein 1 OS=Bos taurus GN=PBXIP1 PE=2 SV=1;>tr|W5NYT2|W5	3	4	4	4	5.7	80.957	5.02e-21	59113000	56613000	80256000	6.53273e+07	25460000	62932000	71707000	5.33663e+07	0.816907	0.497335
Q2YDH6;W5Q4L7;L8I6X0	>sp|Q2YDH6|AP3S1_BOVIN AP-3 complex subunit sigma-1 OS=Bos taurus GN=AP3S1 PE=2 SV=1;>tr|W5Q4L7|W5Q4L7_SHEEP Uncharacterized protein OS=Ovis aries PE=4 SV=1;>tr|L8I6X0|L8I6X0_9CETA AP-3 complex subunit sigma-1 (Fragment) OS=Bos mutus GN=M91_05325 PE=4 SV=1	3	2	2	2	13.5	21.732	3.77e-13	6357300		2131400	4244350	2848900	2112600		2480750	0.584483	0.497353
E1BIN5;L8IG39;W5QGT1	>tr|E1BIN5|E1BIN5_BOVIN Uncharacterized protein OS=Bos taurus GN=CUL3 PE=3 SV=2;>tr|L8IG39|L8IG39_9CETA Cullin-3 OS=Bos mutus GN=M91_13267 PE=3 SV=1;>tr|W5QGT1|W5QGT1_SHEEP Uncharacterized protein OS=Ovis aries GN=CUL3 PE=3 SV=1	3	4	4	4	6.2	88.958	3.09e-07		13743000	12065000	12904000	6909400	13408000		10158700	0.787252	0.499283
A5PJY0;F1ME46;L8HNU8;Q8MJ82	>tr|A5PJY0|A5PJY0_BOVIN LMAN1 protein OS=Bos taurus GN=LMAN1 PE=2 SV=1;>tr|F1ME46|F1ME46_BOVIN Uncharacterized protein OS=Bos taurus GN=LMAN1 PE=1 SV=2;>tr|L8HNU8|L8HNU8_9CETA Protein ERGIC-53 (Fragment) OS=Bos mutus GN=M91_18504 PE=4 SV=1	4	14	14	3	28.4	58.056	0	565000000	422890000	904590000	6.30827e+08	384170000	450250000	681880000	5.05433e+08	0.801224	0.499347
W5NUU1	>tr|W5NUU1|W5NUU1_SHEEP Uncharacterized protein OS=Ovis aries GN=VRK2 PE=4 SV=1	1	1	1	1	2.2	58.531	0.0014776	34362000	36776000	33517000	34885000	18939000	34567000	123920000	59142000	1.69534	0.499598
W5P8P0;L8I5X1;A6QR68	>tr|W5P8P0|W5P8P0_SHEEP Uncharacterized protein OS=Ovis aries GN=SLC31A1 PE=4 SV=1;>tr|L8I5X1|L8I5X1_9CETA High affinity copper uptake protein 1 (Fragment) OS=Bos mutus GN=M91_10125 PE=4 SV=1;>tr|A6QR68|A6QR68_BOVIN SLC31A1 protein OS=Bos taurus GN=SLC31A1	3	2	2	2	15.2	21.91	5.74e-15	55390000	55117000	52209000	5.42387e+07		44240000	90777000	67508500	1.24466	0.501006
A5PJN2;W5Q834;L8IDW8;A0T2W2	>sp|A5PJN2|ERO1A_BOVIN ERO1-like protein alpha OS=Bos taurus GN=ERO1A PE=2 SV=1;>tr|W5Q834|W5Q834_SHEEP Uncharacterized protein OS=Ovis aries GN=ERO1A PE=4 SV=1;>tr|L8IDW8|L8IDW8_9CETA ERO1-like protein alpha (Fragment) OS=Bos mutus GN=M91_04808 PE=4 SV=1	4	11	11	11	29.1	54.296	1.33e-72	86242000	81611000	137110000	1.01654e+08	19319000	52606000	142530000	71485000	0.703216	0.501358
W5P5Q2;L8IXN8;F1MNN6;Q3SYU9;A1L549	>tr|W5P5Q2|W5P5Q2_SHEEP Uncharacterized protein OS=Ovis aries GN=MVP PE=4 SV=1;>tr|L8IXN8|L8IXN8_9CETA Major vault protein OS=Bos mutus GN=M91_10852 PE=4 SV=1;>tr|F1MNN6|F1MNN6_BOVIN Major vault protein OS=Bos taurus GN=MVP PE=4 SV=1;>sp|Q3SYU9|MVP_BOVIN M	5	27	27	27	42.8	99.217	0	178650000	252790000	163070000	198170000	383920000	224650000	149920000	252830000	1.27582	0.503
Q3T057;W5NQ87;W5PJY3;W5NSP4;L8IGX3;W5QG71;A1XED4;W5PIF4;W5Q5B4;W5PDZ7;G3MY15;W5QBX7	>sp|Q3T057|RL23_BOVIN 60S ribosomal protein L23 OS=Bos taurus GN=RPL23 PE=2 SV=2;>tr|W5NQ87|W5NQ87_SHEEP Uncharacterized protein OS=Ovis aries GN=LOC105612165 PE=3 SV=1;>tr|W5PJY3|W5PJY3_SHEEP Uncharacterized protein OS=Ovis aries GN=RPL23 PE=3 SV=1;>tr|W5	12	7	7	7	62.1	14.865	5e-68	277300000	373500000	133640000	261480000	348260000	529250000	178040000	351850000	1.34561	0.503397
W5PG95;E5D619;E5D621;G1CQF2;Q4U0F3;K8FK38;D7R259;E5D620;E5D616;H2DGR0;K9ZRL4;K9ZTJ2;Q27965;Q27975;S4VA54;F8UN03;E5D618;F2YUG7;H2DGR2;W6CNS2;L8HL28;C5IZH4;L8HNW7;H2DGR1;J9QGI9;K8FBG2;A7XV32;I6X984;I6YID3;W5PC31;Q683R5;A7LN90;R9W073;K9ZRK9;K9ZRQ6;K9ZSW3;K9ZU00;K9ZRQ1;K9ZTI8;A0A142I871;Q599X1;A0A142I870;A0A173FE43;A9XIS5;G3ETQ9	>tr|W5PG95|W5PG95_SHEEP Uncharacterized protein OS=Ovis aries GN=HSPA1A PE=3 SV=1;>tr|E5D619|E5D619_BOSIN Heat shock 70 kDa protein 1A OS=Bos indicus GN=HSPA1A PE=3 SV=1;>tr|E5D621|E5D621_BUBBU Heat shock 70 kDa protein 1A OS=Bubalus bubalis GN=HSPA1A PE=3	45	20	16	9	42	70.4	5.88e-145	165310000	189620000	150990000	168640000	225960000	261890000	117110000	2.01653e+08	1.19576	0.503518
W5P5W0;A7E376	>tr|W5P5W0|W5P5W0_SHEEP Uncharacterized protein OS=Ovis aries GN=MCM10 PE=4 SV=1;>tr|A7E376|A7E376_BOVIN MCM10 protein (Fragment) OS=Bos taurus GN=MCM10 PE=2 SV=1	2	1	1	1	1.1	97.44	0.0011975	12478000	12229000	6706700	1.04712e+07	12793000	13815000	9741600	1.21165e+07	1.15713	0.504475
W5PK95;Q2HJ60;L8I257;W5P686;L8ITQ8;W5P1D6;W5Q4L0	>tr|W5PK95|W5PK95_SHEEP Uncharacterized protein OS=Ovis aries GN=HNRNPA2B1 PE=4 SV=1;>sp|Q2HJ60|ROA2_BOVIN Heterogeneous nuclear ribonucleoproteins A2/B1 OS=Bos taurus GN=HNRNPA2B1 PE=2 SV=1;>tr|L8I257|L8I257_9CETA Heterogeneous nuclear ribonucleoproteins	7	15	15	14	49.3	37.429	1.6e-176	376770000	203540000	108980000	2.29763e+08	449430000	269340000	205280000	3.08017e+08	1.34058	0.505812
W5Q7Z7;E1BKT9;L8INK7	>tr|W5Q7Z7|W5Q7Z7_SHEEP Uncharacterized protein OS=Ovis aries GN=DSP PE=4 SV=1;>tr|E1BKT9|E1BKT9_BOVIN Uncharacterized protein OS=Bos taurus GN=DSP PE=1 SV=1;>tr|L8INK7|L8INK7_9CETA Desmoplakin (Fragment) OS=Bos mutus GN=M91_06211 PE=4 SV=1	3	16	16	16	5.8	317.88	1.15e-44	81466000	32130000	27660000	4.70853e+07	33025000	36786000	192540000	8.74503e+07	1.85727	0.505963
L8IPB7;L8IRS0;Q5E9E2;W5PKY9;A4IF97;W5PL19;G9G9W4;Q8MJ94;B9VH05;L8IFZ0;Q7M2V5	>tr|L8IPB7|L8IPB7_9CETA Myosin regulatory light chain 12A (Fragment) OS=Bos mutus GN=M91_16088 PE=4 SV=1;>tr|L8IRS0|L8IRS0_9CETA Myosin regulatory light chain 12B (Fragment) OS=Bos mutus GN=M91_16087 PE=4 SV=1;>sp|Q5E9E2|MYL9_BOVIN Myosin regulatory light	11	9	9	5	61.5	20.037	5.86e-220	699390000	472890000	372680000	5.14987e+08	416900000	537340000	1088900000	6.81047e+08	1.32245	0.50733
Q3ZBG0;A7E3D5;L8INJ3;W5PZ65;E1BD83;L8HYI7;W5PB07	>sp|Q3ZBG0|PSA7_BOVIN Proteasome subunit alpha type-7 OS=Bos taurus GN=PSMA7 PE=1 SV=1;>tr|A7E3D5|A7E3D5_BOVIN Proteasome subunit alpha type (Fragment) OS=Bos taurus GN=PSMA7 PE=2 SV=1;>tr|L8INJ3|L8INJ3_9CETA Proteasome endopeptidase complex (Fragment) OS=	7	5	5	5	22.2	27.869	2.51e-16	66410000	27051000	20778000	3.80797e+07	35317000	21802000	24713000	2.72773e+07	0.716323	0.507503
L8IAS4;Q17QC5;W5PMA0	>tr|L8IAS4|L8IAS4_9CETA AP-2 complex subunit sigma (Fragment) OS=Bos mutus GN=M91_02214 PE=4 SV=1;>sp|Q17QC5|AP2S1_BOVIN AP-2 complex subunit sigma OS=Bos taurus GN=AP2S1 PE=2 SV=1;>tr|W5PMA0|W5PMA0_SHEEP Uncharacterized protein OS=Ovis aries GN=AP2S1 PE=4	3	5	5	5	29.5	19.874	1.02e-19	69057000	44625000	69538000	6.10733e+07	78110000	70887000	56722000	68573000	1.1228	0.508796
E1BBC4;W5QGU0;W5QGU2;L8I2U8	>tr|E1BBC4|E1BBC4_BOVIN Uncharacterized protein OS=Bos taurus GN=OPA1 PE=3 SV=2;>tr|W5QGU0|W5QGU0_SHEEP Uncharacterized protein OS=Ovis aries GN=OPA1 PE=3 SV=1;>tr|W5QGU2|W5QGU2_SHEEP Uncharacterized protein OS=Ovis aries GN=OPA1 PE=3 SV=1;>tr|L8I2U8|L8I2U	4	3	3	3	3.4	115.59	2.24e-06	6750200	8001800	16052000	10268000		7548700	23515000	15531850	1.51265	0.508917
E1BNU3;W5P0M3;L8IX96	>tr|E1BNU3|E1BNU3_BOVIN Uncharacterized protein OS=Bos taurus GN=KANK3 PE=4 SV=2;>tr|W5P0M3|W5P0M3_SHEEP Uncharacterized protein OS=Ovis aries GN=KANK3 PE=4 SV=1;>tr|L8IX96|L8IX96_9CETA KN motif and ankyrin repeat domain-containing protein 3 (Fragment) OS=	3	2	2	2	2.5	84.655	0.0023904	124930000	7191300	13103000	48408100	9275500	10553000	39603000	19810500	0.409239	0.50974
Q3MHL7;W5PJX0;W5PJX1;L8J5B1;F1MGX0;F1MP48;L8IBJ7;Q3T084;W5PFI4;W5PFI2;F1MQ35;Q17QX5;W5PHG4	>sp|Q3MHL7|TCPZ_BOVIN T-complex protein 1 subunit zeta OS=Bos taurus GN=CCT6A PE=1 SV=3;>tr|W5PJX0|W5PJX0_SHEEP Uncharacterized protein OS=Ovis aries GN=CCT6A PE=3 SV=1;>tr|W5PJX1|W5PJX1_SHEEP Uncharacterized protein OS=Ovis aries GN=CCT6A PE=3 SV=1;>tr|L8	13	22	22	19	50.5	57.956	0	712190000	800850000	488190000	6.67077e+08	790850000	553800000	276320000	5.40323e+08	0.809987	0.509868
L8HW41;Q3ZCI9;W5PYM5;L8HVE8;G3X861;Q9XSG6;Q7YSF1;F6K440;A1E949;A1EC51	>tr|L8HW41|L8HW41_9CETA T-complex protein 1 subunit theta (Fragment) OS=Bos mutus GN=M91_08993 PE=3 SV=1;>sp|Q3ZCI9|TCPQ_BOVIN T-complex protein 1 subunit theta OS=Bos taurus GN=CCT8 PE=1 SV=3;>tr|W5PYM5|W5PYM5_SHEEP Uncharacterized protein OS=Ovis aries G	10	30	30	30	62.2	60.322	2.15e-178	982540000	993560000	654120000	876740000	1030700000	733610000	408360000	7.24223e+08	0.826041	0.510579
E1BJ75;W5Q246	>tr|E1BJ75|E1BJ75_BOVIN Uncharacterized protein OS=Bos taurus GN=CRTAP PE=4 SV=1;>tr|W5Q246|W5Q246_SHEEP Uncharacterized protein OS=Ovis aries GN=CRTAP PE=4 SV=1	2	9	9	9	20.9	46.846	1.84e-27	124250000	123790000	177790000	1.41943e+08	59853000	92473000	184160000	112162000	0.790189	0.510765
L8I6M7;A6H7D3;F6S1Q0;W5P2K5;W5Q5M3;A1XEB2;A1XEA5	>tr|L8I6M7|L8I6M7_9CETA Keratin, type I cytoskeletal 18 (Fragment) OS=Bos mutus GN=M91_05606 PE=3 SV=1;>tr|A6H7D3|A6H7D3_BOVIN KRT18 protein (Fragment) OS=Bos taurus GN=KRT18 PE=2 SV=1;>tr|F6S1Q0|F6S1Q0_BOVIN Uncharacterized protein OS=Bos taurus GN=KRT18	7	3	1	1	5.2	49.291	8.05e-09	302720000	300190000	1155400000	5.86103e+08	197910000	558990000	3000100000	1.25233e+09	2.13671	0.511199
F1N672;W5P246;L8IFH2	>tr|F1N672|F1N672_BOVIN Transmembrane 9 superfamily member OS=Bos taurus GN=TM9SF2 PE=1 SV=2;>tr|W5P246|W5P246_SHEEP Transmembrane 9 superfamily member OS=Ovis aries GN=TM9SF2 PE=3 SV=1;>tr|L8IFH2|L8IFH2_9CETA Transmembrane 9 superfamily member OS=Bos mutu	3	5	5	5	9	76.269	1.09e-26	62133000	49251000	123840000	78408000	25399000	32958000	103810000	5.40557e+07	0.689415	0.512998
E1BPI1;W5PRN4;L8IIH9	>tr|E1BPI1|E1BPI1_BOVIN Transporter OS=Bos taurus GN=SLC6A11 PE=3 SV=2;>tr|W5PRN4|W5PRN4_SHEEP Uncharacterized protein OS=Ovis aries GN=SLC6A11 PE=4 SV=1;>tr|L8IIH9|L8IIH9_9CETA Sodium-and chloride-dependent GABA transporter 3 OS=Bos mutus GN=M91_08240 PE=	3	1	1	1	1.4	70.135	0.0021644	39483000	19015000	17201000	25233000		13576000	22406000	17991000	0.712995	0.513193
L8IRY2;W5P503;W5QB48;Q28851;L8J0M5	>tr|L8IRY2|L8IRY2_9CETA Pentatricopeptide repeat-containing protein 1 (Fragment) OS=Bos mutus GN=M91_05921 PE=4 SV=1;>tr|W5P503|W5P503_SHEEP Uncharacterized protein OS=Ovis aries GN=LOC101113624 PE=4 SV=1;>tr|W5QB48|W5QB48_SHEEP Uncharacterized protein OS=	5	2	2	2	3.2	83.264	7.85e-13	36428000	23038000	73617000	44361000	20749000	48169000	163980000	7.76327e+07	1.75002	0.513216
W5PK38;Q2TA49;L8I9G4	>tr|W5PK38|W5PK38_SHEEP Uncharacterized protein OS=Ovis aries GN=VASP PE=4 SV=1;>sp|Q2TA49|VASP_BOVIN Vasodilator-stimulated phosphoprotein OS=Bos taurus GN=VASP PE=2 SV=3;>tr|L8I9G4|L8I9G4_9CETA Vasodilator-stimulated phosphoprotein (Fragment) OS=Bos mutu	3	5	5	5	12.7	44.141	5.7e-12	15351000	20265000	21847000	1.91543e+07	21920000	20235000		21077500	1.1004	0.513381
A7E336;F1MDN4;A0A097C2Z0;Q95140;W5PQC5;Q862I9;A0A076N8K2;Q862E2;Q862M5;W5PWD4;Q862Q6;A3QP70	>tr|A7E336|A7E336_BOVIN 60S acidic ribosomal protein P0 OS=Bos taurus GN=RPLP0 PE=2 SV=1;>tr|F1MDN4|F1MDN4_BOVIN 60S acidic ribosomal protein P0 OS=Bos taurus GN=RPLP0 PE=3 SV=1;>tr|A0A097C2Z0|A0A097C2Z0_CAPHI 60S acidic ribosomal protein P0 OS=Capra hircu	12	11	11	11	39.7	35.504	6.6e-55	652910000	477120000	332390000	4.87473e+08	988850000	534180000	379160000	6.34063e+08	1.30071	0.514242
C5IWV1;L8IFR5;Q148D3	>tr|C5IWV1|C5IWV1_SHEEP Fumarate hydratase OS=Ovis aries GN=FH PE=2 SV=1;>tr|L8IFR5|L8IFR5_9CETA Fumarate hydratase, mitochondrial OS=Bos mutus GN=M91_16303 PE=3 SV=1;>tr|Q148D3|Q148D3_BOVIN Fumarate hydratase OS=Bos taurus GN=FH PE=1 SV=1	3	3	3	3	7.6	54.621	3.53e-09	11538000		15513000	13525500		7458900	13751000	10604950	0.784071	0.514757
W5NVS2;F1MBQ0;W5NVS4;L8IK24	>tr|W5NVS2|W5NVS2_SHEEP Uncharacterized protein OS=Ovis aries GN=DYNC1LI2 PE=4 SV=1;>tr|F1MBQ0|F1MBQ0_BOVIN Uncharacterized protein OS=Bos taurus GN=DYNC1LI2 PE=4 SV=1;>tr|W5NVS4|W5NVS4_SHEEP Uncharacterized protein OS=Ovis aries GN=DYNC1LI2 PE=4 SV=1;>tr|	4	8	8	8	23.6	55.453	5.89e-31	9504200	23473000	8025400	1.36675e+07	35011000	9256200		22133600	1.61943	0.515315
W5QG43;L8IRB0;F1N269;Q28824;O02827;Q30DR3	>tr|W5QG43|W5QG43_SHEEP Myosin light chain kinase, smooth muscle OS=Ovis aries GN=MYLK PE=4 SV=1;>tr|L8IRB0|L8IRB0_9CETA Myosin light chain kinase, smooth muscle OS=Bos mutus GN=M91_04245 PE=4 SV=1;>tr|F1N269|F1N269_BOVIN Myosin light chain kinase, smooth	6	4	4	4	2.4	211.46	1.53e-08	21691000	18717000		20204000		14628000	20578000	17603000	0.871263	0.516078
L8IP92;A6QLC5;A8E4M7;W5QIH3;Q58DA0;Q0V8N4;A7UHZ2;Q58D01	>tr|L8IP92|L8IP92_9CETA Putative PIP5K1A and PSMD4-like protein (Fragment) OS=Bos mutus GN=M91_14473 PE=4 SV=1;>tr|A6QLC5|A6QLC5_BOVIN PIP5K1A protein OS=Bos taurus GN=PIP5K1A PE=2 SV=1;>tr|A8E4M7|A8E4M7_BOVIN PIP5K1A protein OS=Bos taurus GN=PIP5K1A PE=2	8	3	3	3	3.9	95.409	5.23e-10	9623700	10342000		9982850	9794000	10224000	11502000	1.05067e+07	1.05247	0.516429
L8J1R7;Q6B4J2;W5PFE3	>tr|L8J1R7|L8J1R7_9CETA Vitamin K epoxide reductase complex subunit 1 OS=Bos mutus GN=M91_19519 PE=4 SV=1;>sp|Q6B4J2|VKOR1_BOVIN Vitamin K epoxide reductase complex subunit 1 OS=Bos taurus GN=VKORC1 PE=2 SV=1;>tr|W5PFE3|W5PFE3_SHEEP Uncharacterized protein	3	2	2	2	14.7	17.967	1.84e-10	53052000	10884000	26362000	3.00993e+07	17329000	20597000	25621000	2.11823e+07	0.703748	0.516594
W5PUR8;L8IDG6;Q3SZ52;Q3SZ43;Q862Q9;L8IUB5;W5PTM9;Q9N1C3	>tr|W5PUR8|W5PUR8_SHEEP Uncharacterized protein OS=Ovis aries GN=TMEM189-UBE2V1 PE=3 SV=1;>tr|L8IDG6|L8IDG6_9CETA Transmembrane protein 189 (Fragment) OS=Bos mutus GN=M91_17001 PE=3 SV=1;>sp|Q3SZ52|UB2V1_BOVIN Ubiquitin-conjugating enzyme E2 variant 1 OS=B	8	1	1	1	2.7	42.128	0.0025141	12567000	28164000	14197000	1.83093e+07	26883000	19857000		23370000	1.2764	0.516736
L8J584;A7MBG8;W5P4I0	>tr|L8J584|L8J584_9CETA RuvB-like helicase (Fragment) OS=Bos mutus GN=M91_01263 PE=3 SV=1;>tr|A7MBG8|A7MBG8_BOVIN RuvB-like helicase OS=Bos taurus GN=RUVBL1 PE=1 SV=1;>tr|W5P4I0|W5P4I0_SHEEP RuvB-like helicase OS=Ovis aries GN=RUVBL1 PE=3 SV=1	3	9	9	9	25.9	51.609	2e-62	38869000	61223000	27151000	4.24143e+07	69379000	40140000		54759500	1.29106	0.517702
G3JXZ3;L8I3V9;Q29RK1;W5PI34;W5PI38;Q0QEK4;L8IDC4	>tr|G3JXZ3|G3JXZ3_BUBBU Citrate synthase OS=Bubalus bubalis GN=CS PE=2 SV=1;>tr|L8I3V9|L8I3V9_9CETA Citrate synthase OS=Bos mutus GN=M91_19735 PE=3 SV=1;>sp|Q29RK1|CISY_BOVIN Citrate synthase, mitochondrial OS=Bos taurus GN=CS PE=1 SV=1;>tr|W5PI34|W5PI34_S	7	6	6	6	15.2	51.772	1.08e-24	45037000	25242000	79174000	4.98177e+07	33372000	54307000	136240000	7.46397e+07	1.49826	0.518681
Q2LGB5;L8IMS7;W5NSC5	>sp|Q2LGB5|TOLIP_BOVIN Toll-interacting protein OS=Bos taurus GN=TOLLIP PE=2 SV=1;>tr|L8IMS7|L8IMS7_9CETA Toll-interacting protein (Fragment) OS=Bos mutus GN=M91_17296 PE=4 SV=1	3	5	5	5	20.5	30.081	1.32e-14	24580000	47030000	9223300	2.69444e+07	72648000	30043000	19627000	4.07727e+07	1.51321	0.519096
W5QD02;A2VDY3	>tr|W5QD02|W5QD02_SHEEP Transmembrane 9 superfamily member OS=Ovis aries GN=TM9SF1 PE=3 SV=1	2	6	6	3	9.2	85.553	1.78e-30	24143000	40358000	51964000	3.88217e+07	13866000	47189000	28798000	29951000	0.771502	0.519246
L8IY30;Q2KJJ8;W5P9G8	>tr|L8IY30|L8IY30_9CETA Phospholipase D3 OS=Bos mutus GN=M91_14230 PE=4 SV=1;>sp|Q2KJJ8|PLD3_BOVIN Phospholipase D3 OS=Bos taurus GN=PLD3 PE=2 SV=1;>tr|W5P9G8|W5P9G8_SHEEP Uncharacterized protein OS=Ovis aries GN=PLD3 PE=4 SV=1	3	7	7	7	17.3	54.605	1.13e-154	48222000	197750000	143510000	1.29827e+08	90173000	84319000	120120000	98204000	0.75642	0.521734
G3MWT9	>tr|G3MWT9|G3MWT9_BOVIN Uncharacterized protein OS=Bos taurus GN=AKAP12 PE=1 SV=1	1	9	3	1	8.3	176.78	1.83e-66	7593300	16822000	8707400	11040900	23041000	12258000	8747100	1.4682e+07	1.32979	0.521751
W5QIV1;L8IN52;Q862H7;F1MX83	>tr|W5QIV1|W5QIV1_SHEEP Protein S100 OS=Ovis aries GN=S100A11 PE=3 SV=1;>tr|L8IN52|L8IN52_9CETA Protein S100 (Fragment) OS=Bos mutus GN=M91_14495 PE=3 SV=1;>tr|Q862H7|Q862H7_BOVIN Protein S100 (Fragment) OS=Bos taurus GN=S100A11 PE=2 SV=1;>tr|F1MX83|F1MX83	4	3	3	3	25.5	11.678	5.5e-10	952260000	519950000	138970000	537060000	461140000	412780000	219070000	364330000	0.678379	0.521769
L8ITC9;Q3T0I5;G1DFZ4;W5PZP9;W5PZP8	>tr|L8ITC9|L8ITC9_9CETA Mitochondrial fission 1 protein OS=Bos mutus GN=M91_01023 PE=4 SV=1;>sp|Q3T0I5|FIS1_BOVIN Mitochondrial fission 1 protein OS=Bos taurus GN=FIS1 PE=2 SV=1;>tr|G1DFZ4|G1DFZ4_CAPHI Mitochondrial fission 1 protein OS=Capra hircus GN=FIS	5	2	2	2	17.8	16.937	9.22e-39	111390000	42384000	56940000	70238000	55051000	54782000	56700000	55511000	0.790327	0.521951
A1A4N9;P52174;P52175;Q56JV4;G1K1A3	>tr|A1A4N9|A1A4N9_BOVIN Nucleoside diphosphate kinase OS=Bos taurus GN=NME1 PE=2 SV=1;>sp|P52174|NDKA1_BOVIN Nucleoside diphosphate kinase A 1 OS=Bos taurus GN=NME1-1 PE=1 SV=3;>sp|P52175|NDKA2_BOVIN Nucleoside diphosphate kinase A 2 OS=Bos taurus GN=NME1-	5	5	1	1	34.2	17.325	2.47e-58	35788000	39890000	12922000	2.95333e+07	35716000	19817000	9060700	2.15312e+07	0.729049	0.521971
F1MHC2;L8IX42;Q2NL10;W5NW17	>tr|F1MHC2|F1MHC2_BOVIN Uncharacterized protein OS=Bos taurus GN=STXBP2 PE=1 SV=1;>tr|L8IX42|L8IX42_9CETA Syntaxin-binding protein 2 (Fragment) OS=Bos mutus GN=M91_04872 PE=3 SV=1;>tr|Q2NL10|Q2NL10_BOVIN Syntaxin binding protein 2 OS=Bos taurus GN=STXBP2 P	4	14	14	14	29.5	66.356	1.14e-62	78539000	71330000	92060000	80643000	76999000	78784000	115360000	90381000	1.12075	0.522137
W5PVQ4;Q05B45;L8IQ39	>tr|W5PVQ4|W5PVQ4_SHEEP Uncharacterized protein OS=Ovis aries GN=TMEM120A PE=4 SV=1;>sp|Q05B45|T120A_BOVIN Transmembrane protein 120A OS=Bos taurus GN=TMEM120A PE=2 SV=1	3	3	3	3	11.7	39.988	1.72e-44	58319000	28621000	87755000	5.82317e+07		23692000	56380000	40036000	0.68753	0.522164
F1N6P2;A7YY49;W5NZW7;L8IJ99	>tr|F1N6P2|F1N6P2_BOVIN Uncharacterized protein OS=Bos taurus PE=4 SV=2;>sp|A7YY49|SURF4_BOVIN Surfeit locus protein 4 OS=Bos taurus GN=SURF4 PE=2 SV=1;>tr|W5NZW7|W5NZW7_SHEEP Uncharacterized protein OS=Ovis aries PE=4 SV=1;>tr|L8IJ99|L8IJ99_9CETA Uncharac	4	3	3	3	5.3	82.121	2.64e-111	215190000	142940000	388060000	248730000	127690000	196820000	251360000	1.91957e+08	0.771747	0.522221
A7MAZ2;L8IJ18;W5NZB8	>tr|A7MAZ2|A7MAZ2_BOVIN STX12 protein OS=Bos taurus GN=STX12 PE=2 SV=1;>tr|L8IJ18|L8IJ18_9CETA Syntaxin-12 OS=Bos mutus GN=M91_13434 PE=3 SV=1;>tr|W5NZB8|W5NZB8_SHEEP Uncharacterized protein OS=Ovis aries GN=STX12 PE=3 SV=1	3	11	11	2	49.6	31.355	5.23e-158	173040000	199960000	192490000	1.88497e+08	205900000	165130000	246640000	205890000	1.09227	0.522701
B9VGZ9;O97725;W5Q341;L8HP99	>tr|B9VGZ9|B9VGZ9_SHEEP NADH dehydrogenase [ubiquinone] 1 alpha subcomplex subunit 12 OS=Ovis aries PE=1 SV=1;>sp|O97725|NDUAC_BOVIN NADH dehydrogenase [ubiquinone] 1 alpha subcomplex subunit 12 OS=Bos taurus GN=NDUFA12 PE=1 SV=1;>tr|W5Q341|W5Q341_SHEEP NA	4	2	2	2	11.7	17.089	0.00020065	5288100		11196000	8242050		4877200	6836200	5856700	0.710588	0.523505
L8I369;A7MB88;W5Q829;W6AWL7	>tr|L8I369|L8I369_9CETA Transmembrane protein 63A (Fragment) OS=Bos mutus GN=M91_07362 PE=4 SV=1;>tr|A7MB88|A7MB88_BOVIN TMEM63A protein OS=Bos taurus GN=TMEM63A PE=2 SV=1;>tr|W5Q829|W5Q829_SHEEP Uncharacterized protein OS=Ovis aries GN=TMEM63A PE=4 SV=1	4	3	3	3	3.8	92.703	3.55e-06	10833000		26344000	18588500		10271000	14573000	12422000	0.668263	0.523641
F6RWK1;W5P171;L8IG55;Q2KJI6	>tr|F6RWK1|F6RWK1_BOVIN Uncharacterized protein OS=Bos taurus GN=ARHGAP1 PE=1 SV=1;>tr|W5P171|W5P171_SHEEP Uncharacterized protein OS=Ovis aries GN=ARHGAP1 PE=4 SV=1;>tr|L8IG55|L8IG55_9CETA Rho GTPase-activating protein 1 (Fragment) OS=Bos mutus GN=M91_116	4	3	3	3	6.6	50.476	7.37e-07	10162000	19957000		15059500	37009000	14925000	15103000	2.23457e+07	1.48383	0.524507
L8J311;W5PDB2;E1BC57;W5PJF0;L8I1Y6;A5PKA4	>tr|L8J311|L8J311_9CETA Tyrosine-protein kinase transmembrane receptor ROR2 (Fragment) OS=Bos mutus GN=M91_12758 PE=3 SV=1;>tr|W5PDB2|W5PDB2_SHEEP Uncharacterized protein OS=Ovis aries GN=ROR2 PE=3 SV=1;>tr|E1BC57|E1BC57_BOVIN Uncharacterized protein OS=Bo	6	8	8	8	11.5	101.96	1.24e-23	9284700	8963900	19082000	1.24435e+07		9092200	27266000	18179100	1.46093	0.525933
W5PY34	>tr|W5PY34|W5PY34_SHEEP Uncharacterized protein OS=Ovis aries GN=DDAH1 PE=4 SV=1	1	12	11	1	42.1	36.711	2.85e-80	58674000	150990000	66775000	9.21463e+07	81787000	111670000	160880000	1.18112e+08	1.28179	0.526286
L8J1A3;P67810;W5PUM6;Q9BDH8	>tr|L8J1A3|L8J1A3_9CETA Signal peptidase complex catalytic subunit SEC11 OS=Bos mutus GN=M91_17725 PE=3 SV=1;>sp|P67810|SC11A_BOVIN Signal peptidase complex catalytic subunit SEC11A OS=Bos taurus GN=SEC11A PE=2 SV=1;>tr|W5PUM6|W5PUM6_SHEEP Signal peptidase	4	4	4	4	19	20.625	3.17e-10	117020000	82897000	205690000	1.35202e+08	43958000	85724000	168410000	99364000	0.734928	0.526586
L8J3G6;W5PSZ5;F1N650;P46193;I6YIV1	>tr|L8J3G6|L8J3G6_9CETA Annexin OS=Bos mutus GN=M91_07998 PE=3 SV=1;>tr|W5PSZ5|W5PSZ5_SHEEP Annexin OS=Ovis aries GN=ANXA1 PE=3 SV=1;>tr|F1N650|F1N650_BOVIN Annexin OS=Bos taurus GN=ANXA1 PE=3 SV=1;>sp|P46193|ANXA1_BOVIN Annexin A1 OS=Bos taurus GN=ANXA1 P	5	18	18	18	57.2	38.939	2.36e-263	5113800000	4354900000	2552100000	4.00693e+09	4380200000	3744300000	1506900000	3.21047e+09	0.801228	0.528719
A6QQP4;L8IFQ8	>tr|A6QQP4|A6QQP4_BOVIN SCARB2 protein OS=Bos taurus GN=SCARB2 PE=1 SV=1;>tr|L8IFQ8|L8IFQ8_9CETA Lysosome membrane protein 2 OS=Bos mutus GN=M91_16148 PE=3 SV=1	2	8	8	5	22.4	53.984	1.49e-243	598810000	251500000	527230000	459180000	302280000	452980000	1300600000	6.85287e+08	1.49241	0.528818
L8IW72;F1MZT7;Q0P5L1	>tr|L8IW72|L8IW72_9CETA Translational activator GCN1 (Fragment) OS=Bos mutus GN=M91_08075 PE=4 SV=1;>tr|F1MZT7|F1MZT7_BOVIN Uncharacterized protein OS=Bos taurus GN=GCN1 PE=4 SV=1	3	13	13	3	6.1	295.01	6.12e-31	102890000	78777000		90833500	191430000	96066000	81148000	1.22881e+08	1.35282	0.531905
L8HMQ9;P68102;W5QJ50;G1DGD4;E1BMB5;L8I2D8	>tr|L8HMQ9|L8HMQ9_9CETA Eukaryotic translation initiation factor 2 subunit 1 OS=Bos mutus GN=M91_06009 PE=4 SV=1;>sp|P68102|IF2A_BOVIN Eukaryotic translation initiation factor 2 subunit 1 OS=Bos taurus GN=EIF2S1 PE=2 SV=2;>tr|W5QJ50|W5QJ50_SHEEP Uncharacte	6	14	14	14	49.5	36.108	2.5e-271	213970000	264830000	142030000	2.06943e+08	382030000	275260000	129850000	262380000	1.26788	0.532763
L8J3N0;Q3SYZ5;W5Q0A5;F1MBQ8	>tr|L8J3N0|L8J3N0_9CETA Putative ATP-dependent RNA helicase DDX5 (Fragment) OS=Bos mutus GN=M91_08949 PE=3 SV=1;>tr|Q3SYZ5|Q3SYZ5_BOVIN DDX5 protein (Fragment) OS=Bos taurus GN=DDX5 PE=2 SV=1;>tr|W5Q0A5|W5Q0A5_SHEEP Uncharacterized protein OS=Ovis aries GN	4	14	13	10	23	75.64	1.2e-41	150760000	77388000	54678000	9.42753e+07	175740000	168190000	44268000	1.29399e+08	1.37257	0.533034
W5Q7E0;B2DFX8	>tr|W5Q7E0|W5Q7E0_SHEEP Uncharacterized protein OS=Ovis aries GN=CKAP4 PE=4 SV=1	2	33	2	2	57.6	64.85	0	185060000	142330000	386040000	237810000	59886000	35250000	357090000	150742000	0.633876	0.533185
W5NZM7;Q9XS71	>tr|W5NZM7|W5NZM7_SHEEP Uncharacterized protein OS=Ovis aries GN=RAB34 PE=4 SV=1;>tr|Q9XS71|Q9XS71_BOVIN GTP-binding protein rah (Fragment) OS=Bos taurus PE=2 SV=1	2	4	4	2	19.6	30.547	1.23e-15	14913000	12396000	18030000	15113000	15675000	15899000	17240000	1.62713e+07	1.07664	0.533305
A0A140C4Q7;A5PKB4;C8BKC2;L8IED3;P79121;Q865R4;B7TRE9;E7BSA0	>tr|A0A140C4Q7|A0A140C4Q7_CAPHI Tissue inhibitor of metalloproteinase 3 protein OS=Capra hircus GN=Timp3 PE=2 SV=1;>tr|A5PKB4|A5PKB4_BOVIN Metalloproteinase inhibitor 3 OS=Bos taurus GN=TIMP3 PE=2 SV=1;>tr|C8BKC2|C8BKC2_SHEEP Metallopeptidase inhibitor 3 O	8	3	3	3	13.3	24.131	6.78e-08	18551000	59174000	15461000	31062000	101070000	42115000	11091000	5.14253e+07	1.65557	0.533381
L8I0D8;W5PUT2;W5PUT3;Q08DJ3;F1MX51	>tr|L8I0D8|L8I0D8_9CETA Far upstream element-binding protein 1 OS=Bos mutus GN=M91_13286 PE=4 SV=1;>tr|W5PUT2|W5PUT2_SHEEP Uncharacterized protein OS=Ovis aries GN=FUBP1 PE=4 SV=1;>tr|W5PUT3|W5PUT3_SHEEP Uncharacterized protein OS=Ovis aries GN=FUBP1 PE=4	5	7	6	6	12.6	71.157	8.19e-17	18478000	7098800		12788400	37568000	10091000		23829500	1.86337	0.535144
A0S012	>tr|A0S012|A0S012_CEREL Beta-actin (Fragment) OS=Cervus elaphus PE=2 SV=1	1	10	1	1	59.2	25.7	0	260070000	133250000	346080000	2.46467e+08	86860000	273800000	883480000	4.14713e+08	1.68263	0.535247
W5PI41;W5PI44;Q8WN55;L8HQD8;A8YXY5;W5P999;W5P9A1;F1MPG6	>tr|W5PI41|W5PI41_SHEEP Uncharacterized protein OS=Ovis aries GN=PTBP1 PE=4 SV=1;>tr|W5PI44|W5PI44_SHEEP Uncharacterized protein OS=Ovis aries GN=PTBP1 PE=4 SV=1;>sp|Q8WN55|PTBP1_BOVIN Polypyrimidine tract-binding protein 1 OS=Bos taurus GN=PTBP1 PE=2 SV=1	8	9	9	9	20.7	65.037	3.02e-91	96017000	53014000	18905000	5.59787e+07	203850000	67579000	18125000	96518000	1.72419	0.535313
A4IFU2;L8IG56;W5Q0M7	>tr|A4IFU2|A4IFU2_BOVIN RAP2B protein OS=Bos taurus GN=RAP2B PE=2 SV=1;>tr|L8IG56|L8IG56_9CETA Ras-related protein Rap-2b OS=Bos mutus GN=M91_05888 PE=4 SV=1;>tr|W5Q0M7|W5Q0M7_SHEEP Uncharacterized protein OS=Ovis aries GN=RAP2B PE=4 SV=1	3	7	4	4	50.3	20.488	1.43e-145	46100000	29238000	64020000	4.64527e+07	53168000	40347000	74643000	5.60527e+07	1.20666	0.535409
L8IMI9;Q9XT97;A7MBA9;W5NQC1;W5NTE9	>tr|L8IMI9|L8IMI9_9CETA Presenilin OS=Bos mutus GN=M91_00661 PE=3 SV=1;>sp|Q9XT97|PSN1_BOVIN Presenilin-1 OS=Bos taurus GN=PSEN1 PE=2 SV=1;>tr|A7MBA9|A7MBA9_BOVIN Presenilin OS=Bos taurus GN=PSEN1 PE=2 SV=1;>tr|W5NQC1|W5NQC1_SHEEP Presenilin OS=Ovis aries	5	3	3	2	6.3	53.639	2.46e-07	20602000	42264000	45172000	3.60127e+07	25262000	52185000	55625000	4.43573e+07	1.23171	0.535909
B0JYP1;P04409;W5Q297;L8IFD8;F1MJX9	>tr|B0JYP1|B0JYP1_BOVIN Protein kinase C OS=Bos taurus GN=PRKCA PE=2 SV=1;>sp|P04409|KPCA_BOVIN Protein kinase C alpha type OS=Bos taurus GN=PRKCA PE=1 SV=3;>tr|W5Q297|W5Q297_SHEEP Protein kinase C OS=Ovis aries GN=PRKCA PE=3 SV=1;>tr|L8IFD8|L8IFD8_9CETA P	5	4	4	4	7.1	76.792	1.09e-10	15466000	11951000		13708500	14280000	16035000		15157500	1.1057	0.53754
W5QGG6;W5QGG7;W5P7W9	>tr|W5QGG6|W5QGG6_SHEEP Uncharacterized protein OS=Ovis aries GN=CCT2 PE=3 SV=1;>tr|W5QGG7|W5QGG7_SHEEP Uncharacterized protein OS=Ovis aries GN=CCT2 PE=3 SV=1;>tr|W5P7W9|W5P7W9_SHEEP Uncharacterized protein OS=Ovis aries PE=4 SV=1	3	25	25	2	66.4	57.519	0	978150000	1271700000	763470000	1004440000	1154600000	839420000	566580000	8.53533e+08	0.84976	0.538908
W5NUS7;A2VDQ6;L8I0T1	>tr|W5NUS7|W5NUS7_SHEEP Uncharacterized protein OS=Ovis aries GN=CDH11 PE=4 SV=1;>tr|A2VDQ6|A2VDQ6_BOVIN Cadherin 11, type 2, OB-cadherin (Osteoblast) OS=Bos taurus GN=CDH11 PE=2 SV=1;>tr|L8I0T1|L8I0T1_9CETA Cadherin-11 OS=Bos mutus GN=M91_15306 PE=4 SV=1	3	17	17	17	26.7	88.245	5.78e-181	224180000	304290000	175830000	2.34767e+08	201510000	226300000	199180000	2.08997e+08	0.890231	0.539435
E1BE28;W5PH22;W5PH19;L8IP37	>tr|E1BE28|E1BE28_BOVIN Uncharacterized protein OS=Bos taurus GN=ATL2 PE=4 SV=2;>tr|W5PH22|W5PH22_SHEEP Uncharacterized protein OS=Ovis aries GN=ATL2 PE=4 SV=1;>tr|W5PH19|W5PH19_SHEEP Uncharacterized protein OS=Ovis aries GN=ATL2 PE=4 SV=1;>tr|L8IP37|L8IP3	4	1	1	1	1.5	66.347	0.0021629	7375700	5980100	5735700	6.36383e+06	3934200	6981200		5457700	0.857612	0.539758
F1MBF6;W5PDR1;A6QR46;L8HW28;W5PEX6;W5Q8C0;F1MX39;G3X7D3;W5PMH4;L8IJ28;L8I5C5	>tr|F1MBF6|F1MBF6_BOVIN Uncharacterized protein OS=Bos taurus GN=RAB6A PE=4 SV=2;>tr|W5PDR1|W5PDR1_SHEEP Uncharacterized protein OS=Ovis aries GN=RAB6A PE=4 SV=1	11	9	9	9	51.9	23.518	6.09e-39	365560000	460030000	613180000	479590000	495060000	482130000	637140000	538110000	1.12202	0.54061
L8IMD4;A6QLW6;Q29RN1	>tr|L8IMD4|L8IMD4_9CETA Vinexin OS=Bos mutus GN=M91_04207 PE=4 SV=1;>tr|A6QLW6|A6QLW6_BOVIN SORBS3 protein OS=Bos taurus GN=SORBS3 PE=1 SV=1;>tr|Q29RN1|Q29RN1_BOVIN Sorbin and SH3 domain containing 3 OS=Bos taurus GN=SORBS3 PE=1 SV=1	3	1	1	1	1.8	79.822	1.9e-11	9845300	5158000		7501650	4348700	6793300		5571000	0.742637	0.541112
W5PKC2;F1MF76;L8I304;Q5BLW3	>tr|W5PKC2|W5PKC2_SHEEP Uncharacterized protein OS=Ovis aries GN=LOC101111247 PE=4 SV=1;>tr|F1MF76|F1MF76_BOVIN Uncharacterized protein OS=Bos taurus GN=LOC515570 PE=4 SV=2;>tr|L8I304|L8I304_9CETA Nodal modulator 1 (Fragment) OS=Bos mutus GN=M91_01936 PE=4	4	12	12	12	11.8	138.78	6.81e-43	103490000	53472000	166360000	107774000	22209000	33582000	158480000	7.14237e+07	0.662717	0.541406
W5P4R1;Q2HJ49;L8II38	>tr|W5P4R1|W5P4R1_SHEEP Uncharacterized protein OS=Ovis aries GN=MSN PE=4 SV=1;>sp|Q2HJ49|MOES_BOVIN Moesin OS=Bos taurus GN=MSN PE=2 SV=3;>tr|L8II38|L8II38_9CETA Moesin (Fragment) OS=Bos mutus GN=M91_15303 PE=4 SV=1	3	34	34	25	51.1	77.511	1.23e-283	1788500000	1911600000	1330900000	1677000000	2798600000	1780100000	1368800000	1982500000	1.18217	0.543124
G5E6G2;L8IWW5;Q148C9;W5QI36	>tr|G5E6G2|G5E6G2_BOVIN Uncharacterized protein OS=Bos taurus PE=4 SV=1;>tr|L8IWW5|L8IWW5_9CETA Heme-binding protein 1 OS=Bos mutus GN=M91_15886 PE=4 SV=1;>sp|Q148C9|HEBP1_BOVIN Heme-binding protein 1 OS=Bos taurus GN=HEBP1 PE=2 SV=1;>tr|W5QI36|W5QI36_SHEE	4	2	2	2	13.6	23.001	1.23e-08		24730000	15110000	19920000	25508000	21815000		23661500	1.18783	0.54321
W5Q009;L8HSB1	>tr|W5Q009|W5Q009_SHEEP Uncharacterized protein OS=Ovis aries GN=XPNPEP2 PE=3 SV=1;>tr|L8HSB1|L8HSB1_9CETA Xaa-Pro aminopeptidase 2 OS=Bos mutus GN=M91_01115 PE=3 SV=1	2	5	1	1	8.8	75.469	7.47e-22	24574000		17888000	21231000	12618000	61273000	28129000	3.40067e+07	1.60175	0.543361
E1BAI0;L8IBD6;W5P6W0	>tr|E1BAI0|E1BAI0_BOVIN Uncharacterized protein OS=Bos taurus GN=RAB23 PE=4 SV=2;>tr|L8IBD6|L8IBD6_9CETA Ras-related protein Rab-23 OS=Bos mutus GN=M91_19624 PE=4 SV=1;>tr|W5P6W0|W5P6W0_SHEEP Uncharacterized protein OS=Ovis aries GN=RAB23 PE=4 SV=1	3	8	8	8	38.4	26.664	4.11e-51	117950000	83045000	110620000	1.03872e+08	73821000	116760000	193930000	1.2817e+08	1.23393	0.54422
L8J2U2;A7MBJ5;W5NVQ4	>tr|L8J2U2|L8J2U2_9CETA Cullin-associated NEDD8-dissociated protein 1 OS=Bos mutus GN=M91_05979 PE=4 SV=1;>sp|A7MBJ5|CAND1_BOVIN Cullin-associated NEDD8-dissociated protein 1 OS=Bos taurus GN=CAND1 PE=2 SV=1;>tr|W5NVQ4|W5NVQ4_SHEEP Uncharacterized protein	3	18	18	18	19.3	136.5	6.76e-58	44076000	31047000	13739000	2.96207e+07	81395000	33092000	16613000	43700000	1.47532	0.545319
G3N361;L8IC55;Q2KJ42;W5Q681	>tr|G3N361|G3N361_BOVIN Uncharacterized protein OS=Bos taurus GN=NONO PE=4 SV=1;>tr|L8IC55|L8IC55_9CETA Non-POU domain-containing octamer-binding protein OS=Bos mutus GN=M91_16567 PE=4 SV=1;>tr|Q2KJ42|Q2KJ42_BOVIN Non-POU domain containing, octamer-binding	4	8	8	7	20.8	60.388	6.92e-26	216200000	111650000	67978000	1.31943e+08	114310000	137060000	40013000	9.71277e+07	0.736135	0.545997
Q32PI9;L8IIZ9	>sp|Q32PI9|MPZL1_BOVIN Myelin protein zero-like protein 1 OS=Bos taurus GN=MPZL1 PE=2 SV=1;>tr|L8IIZ9|L8IIZ9_9CETA Myelin protein zero-like protein 1 (Fragment) OS=Bos mutus GN=M91_01086 PE=4 SV=1	2	2	2	2	10.4	29.314	1.88e-10	31247000	24570000	65532000	4.04497e+07	42841000	25127000	25833000	31267000	0.772985	0.546258
W5NUE3;L8IPK1;F4YD22;Q5E947;Q9BGI4;Q862N9;Q4JJA4	>tr|W5NUE3|W5NUE3_SHEEP Uncharacterized protein OS=Ovis aries GN=PRDX1 PE=4 SV=1;>tr|L8IPK1|L8IPK1_9CETA Peroxiredoxin-1 (Fragment) OS=Bos mutus GN=M91_21621 PE=4 SV=1;>tr|F4YD22|F4YD22_BUBBU Peroxiredoxin 1 OS=Bubalus bubalis GN=PRDX1 PE=2 SV=1;>sp|Q5E947	7	11	11	4	51.2	27.13	4.47e-129	1077600000	1973200000	997610000	1349470000	3992800000	1890800000	342400000	2.07533e+09	1.53789	0.546457
W5PKR5;A4FV11;L8IPS7;F1N0S9	>tr|W5PKR5|W5PKR5_SHEEP Uncharacterized protein OS=Ovis aries GN=FAM98A PE=4 SV=1;>tr|A4FV11|A4FV11_BOVIN LOC530070 protein OS=Bos taurus GN=LOC530070 PE=2 SV=1;>tr|L8IPS7|L8IPS7_9CETA Protein FAM98A (Fragment) OS=Bos mutus GN=M91_20394 PE=4 SV=1;>tr|F1N0S	4	2	2	2	5.2	55.446	1.07e-18	10977000	7685000		9331000	17289000	10972000	7594300	1.19518e+07	1.28087	0.546599
A0A140T867;A1L595;U3MXA9;W5Q744;C8C9Q3;L8IBR8;W5Q1E7;F1MJ66;G3MX98;W5Q6K9;W5Q1N0;F1MPK1;A6QQQ9;L8IES2;L8HMJ6;L8IH08;Q2KI75;W5PZK5	>tr|A0A140T867|A0A140T867_BOVIN Keratin, type I cytoskeletal 17 OS=Bos taurus GN=KRT17 PE=3 SV=1;>sp|A1L595|K1C17_BOVIN Keratin, type I cytoskeletal 17 OS=Bos taurus GN=KRT17 PE=2 SV=1;>tr|U3MXA9|U3MXA9_SHEEP Keratin 17 OS=Ovis aries GN=KRT17 PE=2 SV=1;>tr	18	15	5	2	27	48.742	7.59e-55	158020000	70682000	120310000	1.16337e+08	110210000	54909000	401590000	188903000	1.62375	0.547126
A6QQ28;E1BC18;G3N0M9;L8I460;L8HX49;F1MVX6;L8HTL0;E1B975;E1BL10;G3MZ91;F1MJU1;L8ID33;L8IZ65;E1B7N8;E1BAA6;E1BHL3;G3MXG7;L8I7Z3;L8IGI7;L8IKL6;G3N1F3;F1N5F3;L8IX63;L8IIZ2;L8HUS3;G5E6E8;G3MXL0;G3MZ02;L8HWM1;L8I8A9;L8J4S5;G3N1G0;G3MYB1;L8I0Z0;L8IUP1;L8J2A6;E1BM22;L8IER5;L8IJQ1	>tr|A6QQ28|A6QQ28_BOVIN Histone H2B OS=Bos taurus GN=H2B PE=2 SV=1;>tr|E1BC18|E1BC18_BOVIN Histone H2B OS=Bos taurus GN=LOC617043 PE=3 SV=2;>tr|G3N0M9|G3N0M9_BOVIN Histone H2B OS=Bos taurus PE=3 SV=1;>tr|L8I460|L8I460_9CETA Histone H2B (Fragment) OS=Bos mu	39	5	1	0	65.7	7.3954	4.74e-53	54063000	28039000	16039000	3.27137e+07	13535000	29403000	30581000	2.45063e+07	0.749116	0.547187
L8I2K2;Q3SZQ1;F1MT12	>tr|L8I2K2|L8I2K2_9CETA Nicastrin OS=Bos mutus GN=M91_19777 PE=4 SV=1;>tr|Q3SZQ1|Q3SZQ1_BOVIN Nicastrin OS=Bos taurus GN=NCSTN PE=2 SV=1;>tr|F1MT12|F1MT12_BOVIN Uncharacterized protein OS=Bos taurus GN=NCSTN PE=1 SV=1	3	6	6	4	11	78.956	1.03e-33	33151000	25410000	54419000	37660000	30581000	26934000	37357000	31624000	0.839724	0.547354
Q58CY8;L8I1P8;W5NUT1;F1MXQ8	>sp|Q58CY8|TSN18_BOVIN Tetraspanin-18 OS=Bos taurus GN=TSPAN18 PE=2 SV=1;>tr|L8I1P8|L8I1P8_9CETA Tetraspanin OS=Bos mutus GN=M91_08426 PE=3 SV=1;>tr|W5NUT1|W5NUT1_SHEEP Tetraspanin OS=Ovis aries GN=TSPAN18 PE=3 SV=1;>tr|F1MXQ8|F1MXQ8_BOVIN Tetraspanin OS=B	4	2	2	2	8.8	27.71	4.02e-11	18516000	19124000	11579000	1.64063e+07	36667000	11822000	16481000	2.16567e+07	1.32002	0.547451
W5Q5V9;G3MXL3;L8HWB8;L8HYK5;Q148H8;W5Q643	>tr|W5Q5V9|W5Q5V9_SHEEP Uncharacterized protein OS=Ovis aries GN=KRT3 PE=3 SV=1;>tr|G3MXL3|G3MXL3_BOVIN Uncharacterized protein OS=Bos taurus GN=KRT3 PE=1 SV=1;>tr|L8HWB8|L8HWB8_9CETA Keratin, type II cytoskeletal 3 (Fragment) OS=Bos mutus GN=M91_10650 PE=	6	16	2	1	18.5	64.585	2.9e-75	162880000	95581000	183970000	147477000	60375000	149890000	503610000	2.37958e+08	1.61353	0.547606
E1BKT3;L8IR09	>tr|E1BKT3|E1BKT3_BOVIN Uncharacterized protein OS=Bos taurus GN=ERBIN PE=4 SV=2;>tr|L8IR09|L8IR09_9CETA Protein LAP2 OS=Bos mutus GN=M91_16818 PE=4 SV=1	2	7	7	2	7.5	162.93	3.49e-33	17541000	11073000	18027000	15547000	33888000	9885700		21886850	1.40779	0.548406
L8HPV1;F1MV90;L8ISP7;L8INS0	>tr|L8HPV1|L8HPV1_9CETA Uncharacterized protein OS=Bos mutus GN=M91_03048 PE=3 SV=1;>tr|F1MV90|F1MV90_BOVIN Uncharacterized protein OS=Bos taurus GN=LOC101904481 PE=3 SV=2;>tr|L8ISP7|L8ISP7_9CETA Tropomyosin alpha-3 chain (Fragment) OS=Bos mutus GN=M91_015	4	14	11	8	49.8	26.354	7.71e-63	611710000	281390000	300890000	3.97997e+08	371360000	263460000	339820000	324880000	0.816288	0.548454
L8HNB5;A6QL88;W5PKD0	>tr|L8HNB5|L8HNB5_9CETA Phosphatidylinositide phosphatase SAC1 (Fragment) OS=Bos mutus GN=M91_08412 PE=4 SV=1;>sp|A6QL88|SAC1_BOVIN Phosphatidylinositide phosphatase SAC1 OS=Bos taurus GN=SACM1L PE=2 SV=1;>tr|W5PKD0|W5PKD0_SHEEP Uncharacterized protein OS=	3	8	8	8	13.6	67.956	5.88e-19	24359000	20615000	44213000	29729000	16896000	17305000	36075000	2.34253e+07	0.787962	0.55029
G0Z3A2;W5QB36;L8ITJ3;P00432;C6KGS5;F8UTU5;C9DRI2	>tr|G0Z3A2|G0Z3A2_CERNI Catalase OS=Cervus nippon GN=CAT PE=2 SV=1;>tr|W5QB36|W5QB36_SHEEP Catalase OS=Ovis aries GN=CAT PE=3 SV=1;>tr|L8ITJ3|L8ITJ3_9CETA Catalase OS=Bos mutus GN=M91_01240 PE=3 SV=1;>sp|P00432|CATA_BOVIN Catalase OS=Bos taurus GN=CAT PE=1	7	12	12	12	28.3	60.027	1.27e-42	108870000	126580000	271350000	1.68933e+08	98743000	97349000	192760000	1.29617e+08	0.767269	0.550448
[truncated: 546 more rows]

## Sheet: FPC vs PPC with or without
Protein IDs	Fasta headers	Proteins	Peptides	Razor + unique peptides	Unique peptides	Sequence coverage [%]	Mol. weight [kDa]	PEP	LFQ intensity FP1_3	LFQ intensity FP2_2	LFQ intensity FP3_2	LFQ intensity PP1_2	LFQ intensity PP2_1	LFQ intensity PP3_4
[truncated: 153 more rows]
