# Supplementary material for: Proteomic Analysis of Plasma Membrane Proteins of Antler Stem Cells Using Label-Free LC–MS/MS
Source: Int J Mol Sci. 2018 Nov 5;19(11):3477. doi: 10.3390/ijms19113477 (PMC6275008; doi:10.3390/ijms19113477)
Supplement: Supplementary file 1 [file ijms-19-03477-s001.zip › supplementary S2.xlsx]

## Sheet: Cellular component
Pathway ID	pathway description	observed gene count	false discovery rate	matching proteins (IDs)	matching proteins (Labels)
GO.0031982	vesicle	99	1.28e-21	ENSP00000001008,ENSP00000007722,ENSP00000163416,ENSP00000205948,ENSP00000212355,ENSP00000216442,ENSP00000216479,ENSP00000216780,ENSP00000216962,ENSP00000217426,ENSP00000221418,ENSP00000226355,ENSP00000229319,ENSP00000231061,ENSP00000232564,ENSP00000234256,ENSP00000251646,ENSP00000258341,ENSP00000259253,ENSP00000261427,ENSP00000261590,ENSP00000261622,ENSP00000261636,ENSP00000261735,ENSP00000261772…	A1BG,AARS,ABCC1,ACSL4,ACTN1,AFM,AHCY,AHSA1,AP2A1,APOA2,APOH,ARL1,ASNA1,ATP6V1D,BAX,CCNY,CDC42BPA,CLIP1,CLTB,COL5A1,COL6A1,COL6A3,CRIM1,CYBRD1,DNAJA1,DSG2,ECH1,EEF1E1,ERP29,FAS,FAT4,FKBP4,FN1,GC,GIPC1,GJA1,GNA14,GNB4,GOLGA5,GPRC5C,GPX4,IARS,ITGA3,ITPR1,KCNMA1,KRT19,KRT33B,KRT86,LAMC1,LDHB,LRPAP1,MARCH3,MARCKSL1,MARS,MFGE8,NAPG,NCKAP1,NPPC,NRP1,PARK7,PCK2,PLA2R1,PRKCD,PRNP,PSAT1,PTPRF,PYGB,RAB31,RA…
GO.0031988	membrane-bounded vesicle	97	1.28e-21	ENSP00000001008,ENSP00000007722,ENSP00000163416,ENSP00000205948,ENSP00000212355,ENSP00000216442,ENSP00000216479,ENSP00000216780,ENSP00000216962,ENSP00000217426,ENSP00000221418,ENSP00000226355,ENSP00000229319,ENSP00000231061,ENSP00000232564,ENSP00000233809,ENSP00000234256,ENSP00000251646,ENSP00000258341,ENSP00000259253,ENSP00000261427,ENSP00000261590,ENSP00000261622,ENSP00000261636,ENSP00000261735…	A1BG,AARS,ABCC1,ACSL4,ACTN1,AFM,AHCY,AHSA1,AP2A1,APOA2,APOH,ARL1,ASNA1,ATP6V1D,BAX,CCNY,CDC42BPA,CLIP1,CLTB,COL5A1,COL6A1,COL6A3,CRIM1,CYBRD1,DNAJA1,DSG2,ECH1,EEF1E1,ERP29,FAS,FAT4,FKBP4,FN1,GC,GIPC1,GJA1,GNA14,GNB4,GOLGA5,GPRC5C,GPX4,IARS,IGFBP2,ITGA3,ITPR1,KCNMA1,KRT19,KRT33B,KRT86,LAMC1,LDHB,MARCH3,MARCKSL1,MARS,MFGE8,NAPG,NCKAP1,NPPC,PARK7,PCK2,PLA2R1,PRKCD,PRNP,PSAT1,PTPRF,PYGB,RAB31,RAB5C,R…
GO.0070062	extracellular exosome	86	2.96e-21	ENSP00000001008,ENSP00000007722,ENSP00000205948,ENSP00000212355,ENSP00000216442,ENSP00000216479,ENSP00000216780,ENSP00000216962,ENSP00000217426,ENSP00000221418,ENSP00000226355,ENSP00000229319,ENSP00000232564,ENSP00000233809,ENSP00000234256,ENSP00000251646,ENSP00000258341,ENSP00000259253,ENSP00000261427,ENSP00000261590,ENSP00000261622,ENSP00000261636,ENSP00000261735,ENSP00000261772,ENSP00000262027…	A1BG,AARS,ABCC1,ACSL4,ACTN1,AFM,AHCY,AHSA1,APOA2,APOH,ARL1,ASNA1,ATP6V1D,BAIAP2,BAX,CCNY,CDC42BPA,COL5A1,COL6A1,COL6A3,CRIM1,CYBRD1,DNAJA1,DSG2,ECH1,EEF1E1,ERP29,FAS,FAT4,FKBP4,FN1,GC,GIPC1,GJA1,GNA14,GNB4,GPRC5C,GPX4,IARS,IGFBP2,ITGA3,KCNMA1,KRT19,KRT33B,KRT86,LAMC1,LDHB,MARCKSL1,MARS,MFGE8,NAPG,NCKAP1,PARK7,PCK2,PLA2R1,PRKCD,PRNP,PSAT1,PTPRF,PYGB,RAB5C,RAB8A,RFTN1,RNASET2,RND3,SCP2,SDK1,SLC1A4,…
GO.0044421	extracellular region part	98	1.25e-20	ENSP00000001008,ENSP00000007722,ENSP00000052754,ENSP00000205948,ENSP00000216442,ENSP00000216479,ENSP00000216780,ENSP00000216962,ENSP00000217426,ENSP00000221418,ENSP00000226355,ENSP00000229319,ENSP00000231061,ENSP00000232564,ENSP00000233809,ENSP00000234256,ENSP00000246891,ENSP00000251646,ENSP00000258341,ENSP00000259253,ENSP00000261427,ENSP00000261590,ENSP00000261622,ENSP00000261636,ENSP00000261735…	A1BG,AARS,ABCC1,ACSL4,ACTN1,AFM,AHCY,AHSA1,AIFM2,APOA2,APOH,ARL1,ASNA1,ATP6V1D,BAIAP2,BAX,CCNY,CD151,CDC42BPA,COL6A1,COL6A3,CRIM1,CSN1S1,CTHRC1,CYBRD1,CYR61,DCN,DNAJA1,DSG2,ECH1,EEF1E1,ERP29,FAS,FAT4,FGF7,FKBP4,FN1,GC,GIPC1,GJA1,GNA14,GNB4,GPRC5C,GPX4,IARS,IGFBP2,ITGA3,ITGA6,KCNMA1,KRT19,KRT33B,KRT81,KRT86,LAMC1,LDHB,LOXL2,MARCKSL1,MARS,MFGE8,NAPG,NCKAP1,NPPC,NRP1,PARK7,PCK2,PLA2R1,PRKCD,PRNP,PSA…
GO.0005576	extracellular region	99	8.45e-16	ENSP00000001008,ENSP00000007722,ENSP00000052754,ENSP00000205948,ENSP00000216442,ENSP00000216479,ENSP00000216780,ENSP00000216962,ENSP00000217426,ENSP00000221418,ENSP00000226355,ENSP00000229319,ENSP00000232564,ENSP00000233809,ENSP00000234256,ENSP00000246891,ENSP00000251646,ENSP00000258341,ENSP00000259253,ENSP00000261427,ENSP00000261590,ENSP00000261622,ENSP00000261636,ENSP00000261735,ENSP00000261772…	A1BG,AARS,ABCC1,ACSL4,ACTN1,AFM,AHCY,AHSA1,AIFM2,APOA2,APOH,ARL1,ASNA1,ATP6V1D,BAIAP2,BAX,CCNY,CD151,CDC42BPA,COL6A1,COL6A3,CRIM1,CSN1S1,CTHRC1,CYBRD1,CYR61,DCN,DNAJA1,DSG2,ECH1,EEF1E1,ERP29,FAS,FAT4,FKBP4,FN1,FOLR2,GC,GIPC1,GJA1,GNA14,GNB4,GPRC5C,GPX4,HSD17B11,IARS,IGFBP2,ITGA3,ITGA6,KCNMA1,KRT19,KRT33B,KRT81,KRT86,LAMC1,LDHB,LOXL2,LRPAP1,MARCKSL1,MARS,MFGE8,NAPG,NCKAP1,NRP1,PARK7,PCK2,PLA2R1,PR…
GO.0016020	membrane	133	2.4e-10	ENSP00000001008,ENSP00000007722,ENSP00000035307,ENSP00000175091,ENSP00000212355,ENSP00000216190,ENSP00000216442,ENSP00000216962,ENSP00000217446,ENSP00000221418,ENSP00000225665,ENSP00000229319,ENSP00000230419,ENSP00000231061,ENSP00000232564,ENSP00000233809,ENSP00000234256,ENSP00000245046,ENSP00000249269,ENSP00000254521,ENSP00000256366,ENSP00000256545,ENSP00000258761,ENSP00000260731,ENSP00000261386…	AARS,ABCC1,ACSL4,ACTN1,ADIPOR1,AIFM2,ARL1,ASNA1,ATAD3A,ATP11A,ATP11C,ATP6V1D,BAIAP2,BAX,BRI3BP,BZW2,CCDC124,CCNY,CD151,CDV3,CHPF2,CLIP1,COL6A3,CRIM1,CTNNA2,CTPS1,DNAJA1,DRAM2,ECH1,EDC4,EIF3D,EMC1,EMC3,EMC7,EPN1,ERP29,FAF2,FAM120A,FAM134A,FAT4,FKBP4,FN1,FOLR2,GBF1,GDE1,GIPC1,GJA1,GNA14,GNB4,GPRC5C,GPX4,HNRNPF,HSD17B7,IARS,IGFBP2,ILVBL,ITGA3,ITGA6,ITPR1,JAGN1,KCNMA1,KIF11,KRT19,LAPTM4A,LDHB,LOXL2,L…
GO.0012505	endomembrane system	74	2.92e-09	ENSP00000001008,ENSP00000035307,ENSP00000052754,ENSP00000175091,ENSP00000185150,ENSP00000216479,ENSP00000217446,ENSP00000219473,ENSP00000231061,ENSP00000245046,ENSP00000254521,ENSP00000256545,ENSP00000259253,ENSP00000261183,ENSP00000261636,ENSP00000261735,ENSP00000261942,ENSP00000263798,ENSP00000263895,ENSP00000264689,ENSP00000265371,ENSP00000267843,ENSP00000269881,ENSP00000282561,ENSP00000283558…	ACSL4,ACTN1,AGL,AHSA1,AP2A1,APOA2,ARL1,ARL6IP1,ASNA1,ATP11A,ATP11C,ATP13A4,BAIAP2,BAX,CALR3,CHPF2,CLIP1,COL5A1,COL6A1,COL6A3,DCN,DNAJA1,DRAM2,EMC1,EMC3,EMC7,EPN1,ERLEC1,ERP29,FAF2,FGF7,FKBP4,FN1,GJA1,GORAB,GPX4,HSD17B7,ITPR1,JAGN1,KCNMA1,KIAA0196,LAPTM4A,MARCH3,NPPC,NRP1,OSBPL8,PARK7,PIGS,PIGU,POR,PRKCD,PRNP,RAB31,RAB5C,RAB8A,RFTN1,RNASET2,RND3,SLC1A5,SNX18,SPARC,SRC,STAU1,STX11,TF,TMED3,TRAPPC5,…
GO.0098805	whole membrane	49	1.5e-08	ENSP00000163416,ENSP00000216442,ENSP00000229319,ENSP00000231061,ENSP00000232564,ENSP00000233809,ENSP00000256366,ENSP00000261590,ENSP00000261622,ENSP00000262544,ENSP00000272233,ENSP00000282561,ENSP00000283558,ENSP00000284320,ENSP00000286692,ENSP00000293217,ENSP00000293288,ENSP00000299705,ENSP00000300935,ENSP00000304565,ENSP00000306253,ENSP00000309141,ENSP00000312370,ENSP00000317332,ENSP00000319141…	ABCC1,ACOX1,ACSL4,AIFM2,ATP11A,ATP11C,ATP6V1D,BAX,BRI3BP,COL6A1,CTNNA2,CYBRD1,DRAM2,DSG2,EPB41L3,EPN1,FAS,FN1,GJA1,GNB4,GOLGA5,IGFBP2,ITGA6,ITPR1,KCNMA1,LDHB,MARCH3,NAPG,NCKAP1,PARK7,PEX14,PRNP,RAB31,RAB5C,RAB8A,RFTN1,RHOB,SEC23B,SLC7A5,SNX18,SPARC,SPTBN1,SRC,SYNJ2BP,TF,TMED3,TMEM231,TOMM70A,VLDLR
GO.0005783	endoplasmic reticulum	44	2.2e-08	ENSP00000001008,ENSP00000185150,ENSP00000216479,ENSP00000217446,ENSP00000245046,ENSP00000254521,ENSP00000256545,ENSP00000259253,ENSP00000261735,ENSP00000261942,ENSP00000262544,ENSP00000263798,ENSP00000264689,ENSP00000265175,ENSP00000269881,ENSP00000282561,ENSP00000283558,ENSP00000293288,ENSP00000294724,ENSP00000295550,ENSP00000299705,ENSP00000306106,ENSP00000306788,ENSP00000309430,ENSP00000316990…	ACSL4,AGL,AHSA1,APOA2,ARL6IP1,ASNA1,ATP11A,ATP11C,ATP13A4,BAX,CALR3,COL5A1,COL6A1,COL6A3,DNAJA1,EMC1,EMC3,EMC7,ERLEC1,ERP29,FAF2,FKBP4,GBF1,GJA1,HSD17B7,JAGN1,KCNMA1,KIAA0196,PARK7,PIGS,PIGU,POR,PRKCD,PRNP,RNASET2,SEC23B,SEC24B,STAU1,TMED3,TRAPPC5,TYRO3,UBQLN1,UFSP2,UGGT1
GO.0005737	cytoplasm	141	2.91e-08	ENSP00000007722,ENSP00000035307,ENSP00000052754,ENSP00000175091,ENSP00000185150,ENSP00000212355,ENSP00000216442,ENSP00000216479,ENSP00000216780,ENSP00000216962,ENSP00000217426,ENSP00000217446,ENSP00000219473,ENSP00000221418,ENSP00000225665,ENSP00000231061,ENSP00000232219,ENSP00000232564,ENSP00000233809,ENSP00000234256,ENSP00000235521,ENSP00000245046,ENSP00000249269,ENSP00000251809,ENSP00000254521…	AARS,ACSL4,ACTN1,AHCY,AHSA1,AIFM2,AP2A1,APOA2,ARL1,ARL6IP1,ASNA1,ATAD3A,ATP11A,ATP11C,ATP13A4,ATP6V1D,BAX,BRI3BP,C21orf33,CALR3,CCDC124,CCNY,CD151,CDC42BPA,CDV3,CHPF2,COL5A1,COL6A1,COL6A3,COMMD3,CTHRC1,CTNNA2,CTPS1,DCN,DLAT,DNAJA1,DRAM2,ECH1,EDC4,EEF1E1,EIF1AX,EIF2S2,EMC1,EMC3,EMC7,EPB41L3,EPN1,ERLEC1,ERP29,EXOC7,FAF2,FAM120A,FAS,FGF7,FMNL3,FN1,G3BP2,GDE1,GIPC1,GJA1,GNB4,GORAB,GPRC5C,HMGN1,HSD17B…
GO.0044444	cytoplasmic part	114	4.65e-08	ENSP00000007722,ENSP00000035307,ENSP00000052754,ENSP00000175091,ENSP00000185150,ENSP00000216442,ENSP00000216479,ENSP00000216780,ENSP00000217426,ENSP00000217446,ENSP00000219473,ENSP00000221418,ENSP00000225665,ENSP00000231061,ENSP00000232219,ENSP00000232564,ENSP00000233809,ENSP00000234256,ENSP00000235521,ENSP00000245046,ENSP00000249269,ENSP00000254521,ENSP00000256545,ENSP00000259253,ENSP00000260731…	AARS,ACSL4,ACTN1,AHCY,AHSA1,AIFM2,AP2A1,APOA2,ARL1,ARL6IP1,ASNA1,ATAD3A,ATP11A,ATP11C,ATP13A4,ATP6V1D,BAX,BRI3BP,C21orf33,CALR3,CCNY,CD151,CHPF2,COL5A1,COL6A1,COL6A3,CTNNA2,CTPS1,DCN,DLAT,DNAJA1,DRAM2,ECH1,EDC4,EEF1E1,EIF1AX,EIF2S2,EMC1,EMC3,EMC7,ERLEC1,ERP29,EXOC7,FAF2,FAS,FGF7,FMNL3,FN1,GIPC1,GJA1,GNB4,GORAB,GPRC5C,HSD17B7,IARS,IGFBP2,IMPDH1,ITGA3,ITPR1,JAGN1,KCNMA1,KIAA0196,KIF11,LAPTM4A,MARCH…
GO.0044432	endoplasmic reticulum part	34	1.87e-07	ENSP00000001008,ENSP00000185150,ENSP00000217446,ENSP00000245046,ENSP00000254521,ENSP00000256545,ENSP00000259253,ENSP00000261735,ENSP00000261942,ENSP00000262544,ENSP00000263798,ENSP00000265175,ENSP00000269881,ENSP00000282561,ENSP00000293288,ENSP00000295550,ENSP00000299705,ENSP00000306106,ENSP00000306253,ENSP00000306788,ENSP00000309430,ENSP00000332756,ENSP00000339182,ENSP00000339787,ENSP00000349887…	ACSL4,APOA2,ARL6IP1,ASNA1,ATP11C,ATP13A4,BAX,CALR3,COL5A1,COL6A1,COL6A3,DNAJA1,EMC1,EMC3,EMC7,ERLEC1,ERP29,FAF2,FKBP4,GBF1,GJA1,HSD17B7,ITPR1,JAGN1,LRPAP1,PIGS,PIGU,POR,RNASET2,SEC23B,SEC24B,TMED3,TYRO3,UGGT1
GO.0031090	organelle membrane	62	2.78e-07	ENSP00000001008,ENSP00000035307,ENSP00000163416,ENSP00000216442,ENSP00000217446,ENSP00000225665,ENSP00000231061,ENSP00000232564,ENSP00000245046,ENSP00000249269,ENSP00000254521,ENSP00000256366,ENSP00000256545,ENSP00000261183,ENSP00000261636,ENSP00000261942,ENSP00000262544,ENSP00000263798,ENSP00000263895,ENSP00000272233,ENSP00000283558,ENSP00000284320,ENSP00000286692,ENSP00000293217,ENSP00000293288…	ACOX1,ACSL4,AIFM2,AP2A1,ARL1,ARL6IP1,ASNA1,ATAD3A,ATP11A,ATP11C,ATP13A4,ATP6V1D,BAX,BRI3BP,CHPF2,CLIP1,COL6A1,DNAJA1,DRAM2,EMC1,EMC3,EMC7,FAF2,FKBP4,GBF1,GIPC1,GNB4,GOLGA5,GPRC5C,GPX4,HSD17B7,ITPR1,JAGN1,MARCH3,NAPG,NDUFS1,NDUFV1,OSBPL8,PEX14,PIGS,PIGU,PMPCB,POR,RAB31,RAB5C,RAB8A,RHOB,RND3,SEC23B,SLC25A11,SLC25A6,SNX18,SPARC,SRC,SUCLG1,SYNJ2BP,TF,TMED3,TMEM231,TOMM70A,TYRO3,VAMP5
GO.0044425	membrane part	100	1.33e-06	ENSP00000001008,ENSP00000035307,ENSP00000163416,ENSP00000175091,ENSP00000212355,ENSP00000216442,ENSP00000217446,ENSP00000225665,ENSP00000229319,ENSP00000230419,ENSP00000233809,ENSP00000234256,ENSP00000245046,ENSP00000254521,ENSP00000256366,ENSP00000256545,ENSP00000261386,ENSP00000261590,ENSP00000261622,ENSP00000261942,ENSP00000262544,ENSP00000262940,ENSP00000263383,ENSP00000263798,ENSP00000265371…	ABCC1,ACSL4,ADIPOR1,AIFM2,ARL6IP1,ASNA1,ATAD3A,ATP11A,ATP11C,ATP13A4,ATP6V1D,BAX,BRI3BP,CD151,CHPF2,CRIM1,CTNNA2,CYBRD1,DNAJA1,DRAM2,DSG2,EMC1,EMC3,EMC7,EPB41L3,EPN1,EXOC7,FAF2,FAM134A,FAT4,FKBP4,FN1,FOLR2,GDE1,GJA1,GNA14,GOLGA5,GPRC5C,HSD17B7,IGFBP2,ILVBL,ITGA6,ITPR1,JAGN1,KCNMA1,KRT19,LAPTM4A,LDHB,LRPAP1,MARCH3,MFGE8,MFSD1,NAPG,NCKAP1,NDUFS1,NDUFV1,NRP1,PARK7,PEX14,PIGS,PIGU,PLA2R1,POR,PRNP,PTK…
GO.0098796	membrane protein complex	29	3.13e-06	ENSP00000007722,ENSP00000212355,ENSP00000216442,ENSP00000217446,ENSP00000245046,ENSP00000256545,ENSP00000261942,ENSP00000262544,ENSP00000265175,ENSP00000282561,ENSP00000284320,ENSP00000293288,ENSP00000299705,ENSP00000305647,ENSP00000306788,ENSP00000309415,ENSP00000309430,ENSP00000322450,ENSP00000324628,ENSP00000347979,ENSP00000351926,ENSP00000355124,ENSP00000356540,ENSP00000365807,ENSP00000370808…	AP2A1,ARL6IP1,ATP6V1D,BAX,CLTB,EMC1,EMC3,EMC7,FAF2,FAS,GJA1,GNA14,ITGA3,ITGA6,KCNMA1,KRT19,NAPG,NDUFS1,NDUFV1,PIGS,PIGU,SEC23B,SEC24B,SLC25A6,STX11,TGFBR3,TMED3,TOMM70A,VAMP5
GO.0098588	bounding membrane of organelle	48	1.23e-05	ENSP00000001008,ENSP00000035307,ENSP00000163416,ENSP00000216442,ENSP00000217446,ENSP00000231061,ENSP00000232564,ENSP00000245046,ENSP00000254521,ENSP00000256366,ENSP00000256545,ENSP00000261636,ENSP00000261942,ENSP00000262544,ENSP00000263798,ENSP00000263895,ENSP00000272233,ENSP00000283558,ENSP00000284320,ENSP00000286692,ENSP00000293217,ENSP00000293288,ENSP00000299705,ENSP00000300935,ENSP00000304565…	ACOX1,ACSL4,AIFM2,AP2A1,ARL1,ARL6IP1,ASNA1,ATP11A,ATP11C,ATP13A4,ATP6V1D,BAX,BRI3BP,CHPF2,COL6A1,DNAJA1,DRAM2,EMC1,EMC3,EMC7,FAF2,FKBP4,GBF1,GNB4,GOLGA5,HSD17B7,ITPR1,JAGN1,MARCH3,NAPG,PEX14,PIGS,PIGU,POR,RAB31,RAB5C,RAB8A,RHOB,RND3,SEC23B,SNX18,SPARC,SYNJ2BP,TF,TMED3,TMEM231,TOMM70A,TYRO3
GO.0043234	protein complex	69	1.44e-05	ENSP00000001008,ENSP00000007722,ENSP00000052754,ENSP00000166534,ENSP00000212355,ENSP00000216442,ENSP00000217446,ENSP00000234256,ENSP00000245046,ENSP00000251646,ENSP00000256545,ENSP00000258341,ENSP00000259818,ENSP00000260731,ENSP00000261942,ENSP00000262544,ENSP00000265175,ENSP00000265371,ENSP00000280346,ENSP00000282561,ENSP00000283243,ENSP00000284320,ENSP00000293288,ENSP00000294724,ENSP00000295550…	AGL,AP2A1,ARL6IP1,ATP6V1D,BAX,CCNY,CLTB,COL5A1,COL6A1,COL6A3,CTHRC1,DCN,DLAT,EIF2S2,EMC1,EMC3,EMC7,EXOC7,FAF2,FAS,FKBP4,FN1,GJA1,GNA14,GPRC5C,H1FX,ITGA3,ITGA6,ITPR1,KCNMA1,KIAA0196,KIF11,KRT33B,KRT81,KRT86,LAMC1,NAPG,NCKAP1,NDUFS1,NDUFV1,NRP1,P4HA2,PEX14,PIGS,PIGU,PLA2R1,RFTN1,RLTPR,SCP2,SEC23B,SEC24B,SH3PXD2B,SLC1A4,SLC25A6,SRC,STAU1,STX11,STXBP1,SUCLG1,TBCD,TGFBR3,TMED3,TMEM231,TOMM70A,TRAPPC5,…
GO.0043227	membrane-bounded organelle	146	1.74e-05	ENSP00000001008,ENSP00000007722,ENSP00000035307,ENSP00000052754,ENSP00000175091,ENSP00000185150,ENSP00000205948,ENSP00000212355,ENSP00000216297,ENSP00000216442,ENSP00000216479,ENSP00000216780,ENSP00000216962,ENSP00000217446,ENSP00000219473,ENSP00000221418,ENSP00000225665,ENSP00000226355,ENSP00000231061,ENSP00000232564,ENSP00000233809,ENSP00000234256,ENSP00000235521,ENSP00000245046,ENSP00000249269…	A1BG,AARS,ABCC1,ACSL4,ACTN1,AFM,AHSA1,AIFM2,AP2A1,APOA2,APOH,ARL1,ARL6IP1,ASNA1,ATAD3A,ATP11A,ATP11C,ATP13A4,ATP6V1D,BAX,BRI3BP,C21orf33,CALR3,CCNY,CDC42BPA,CDV3,CHPF2,CLIP1,COL5A1,COL6A1,COL6A3,COMMD3,CRIM1,CYBRD1,DCN,DLAT,DNAJA1,DRAM2,DSG2,ECH1,EDC4,EEF1E1,EMC1,EMC3,EMC7,EPN1,ERLEC1,ERP29,FAF2,FAS,FAT4,FGF7,FKBP4,FN1,GC,GIPC1,GJA1,GNA14,GNB4,GORAB,GPRC5C,H1FX,HMGN1,HNRNPF,HSD17B7,IARS,IGFBP2,IM…
GO.0044420	extracellular matrix component	10	2.94e-05	ENSP00000052754,ENSP00000231061,ENSP00000258341,ENSP00000262768,ENSP00000295550,ENSP00000324101,ENSP00000346839,ENSP00000355180,ENSP00000373783,ENSP00000386896	CD151,COL6A1,COL6A3,DCN,FN1,ITGA6,LAMC1,LOXL2,SPARC,TIMP2
GO.0032991	macromolecular complex	75	3.24e-05	ENSP00000001008,ENSP00000007722,ENSP00000052754,ENSP00000166534,ENSP00000205948,ENSP00000212355,ENSP00000216442,ENSP00000217446,ENSP00000234256,ENSP00000245046,ENSP00000251646,ENSP00000256545,ENSP00000258341,ENSP00000259818,ENSP00000260731,ENSP00000261942,ENSP00000262544,ENSP00000265175,ENSP00000265371,ENSP00000280346,ENSP00000282561,ENSP00000283243,ENSP00000284320,ENSP00000293288,ENSP00000294724…	AGL,AP2A1,APOA2,APOH,ARL6IP1,ATP6V1D,BAX,CCNY,CLTB,COL5A1,COL6A1,COL6A3,CTHRC1,DCN,DLAT,EDC4,EIF2S2,EMC1,EMC3,EMC7,EXOC7,FAF2,FAS,FKBP4,FN1,GJA1,GNA14,GPRC5C,H1FX,HMGN1,HNRNPF,ITGA3,ITGA6,ITPR1,KCNMA1,KIAA0196,KIF11,KRT33B,KRT81,KRT86,LAMC1,NAPG,NCKAP1,NDUFS1,NDUFV1,NRP1,P4HA2,PARK7,PEX14,PIGS,PIGU,PLA2R1,RFTN1,RLTPR,SCP2,SEC23B,SEC24B,SH3PXD2B,SLC1A4,SLC25A6,SRC,STAU1,STX11,STXBP1,SUCLG1,TBCD,TG…
GO.0031410	cytoplasmic vesicle	30	3.33e-05	ENSP00000163416,ENSP00000217426,ENSP00000231061,ENSP00000233809,ENSP00000234256,ENSP00000261735,ENSP00000262544,ENSP00000265371,ENSP00000282561,ENSP00000295440,ENSP00000299705,ENSP00000300935,ENSP00000303585,ENSP00000304565,ENSP00000305647,ENSP00000306253,ENSP00000309141,ENSP00000309415,ENSP00000316338,ENSP00000317332,ENSP00000340698,ENSP00000345689,ENSP00000346839,ENSP00000351926,ENSP00000356540…	ACTN1,AHCY,AP2A1,BAIAP2,CLIP1,CLTB,ERP29,FN1,GIPC1,GJA1,GOLGA5,GPRC5C,IGFBP2,ITPR1,MARCH3,NPPC,NRP1,RAB31,RAB5C,RAB8A,SEC23B,SLC1A4,SLC1A5,SNX18,SPARC,STX11,TF,TMED3,UBQLN1,VAMP5
GO.0043226	organelle	150	3.53e-05	ENSP00000001008,ENSP00000007722,ENSP00000035307,ENSP00000052754,ENSP00000175091,ENSP00000185150,ENSP00000205948,ENSP00000212355,ENSP00000216297,ENSP00000216442,ENSP00000216479,ENSP00000216780,ENSP00000216962,ENSP00000217446,ENSP00000219473,ENSP00000221418,ENSP00000225665,ENSP00000226355,ENSP00000231061,ENSP00000232564,ENSP00000234256,ENSP00000235521,ENSP00000245046,ENSP00000249269,ENSP00000251646…	A1BG,AARS,ABCC1,ACSL4,ACTN1,AFM,AHSA1,AIFM2,AP2A1,APOA2,APOH,ARL1,ARL6IP1,ASNA1,ATAD3A,ATP11A,ATP11C,ATP13A4,ATP6V1D,BAX,BRI3BP,C21orf33,CALR3,CCDC124,CCNY,CDC42BPA,CDV3,CHPF2,COL5A1,COL6A1,COL6A3,COMMD3,CRIM1,CTNNA2,CYBRD1,DCN,DLAT,DNAJA1,DRAM2,DSG2,ECH1,EDC4,EEF1E1,EMC1,EMC3,EMC7,EPB41L3,EPN1,ERLEC1,ERP29,EXOC7,FAF2,FAS,FAT4,FGF7,FKBP4,FN1,GC,GIPC1,GJA1,GNA14,GNB4,GORAB,GPRC5C,H1FX,HMGN1,HNRNPF…
GO.0005788	endoplasmic reticulum lumen	12	4.76e-05	ENSP00000166534,ENSP00000185150,ENSP00000259253,ENSP00000261735,ENSP00000269881,ENSP00000295550,ENSP00000355180,ENSP00000356969,ENSP00000359000,ENSP00000360882,ENSP00000421922,ENSP00000422846	APOA2,CALR3,COL5A1,COL6A1,COL6A3,ERLEC1,ERP29,GBF1,LRPAP1,P4HA2,RNASET2,UGGT1
GO.0005589	collagen type VI trimer	3	6.37e-05	ENSP00000052754,ENSP00000295550,ENSP00000355180	COL6A1,COL6A3,DCN
GO.0005886	plasma membrane	74	6.37e-05	ENSP00000007722,ENSP00000212355,ENSP00000217446,ENSP00000225665,ENSP00000230419,ENSP00000232564,ENSP00000233809,ENSP00000234256,ENSP00000254521,ENSP00000261622,ENSP00000262940,ENSP00000263798,ENSP00000264993,ENSP00000265371,ENSP00000268150,ENSP00000272233,ENSP00000277165,ENSP00000280527,ENSP00000282561,ENSP00000283243,ENSP00000283558,ENSP00000293217,ENSP00000295550,ENSP00000298223,ENSP00000300935…	ABCC1,ACOX1,ACTN1,ADIPOR1,ATP11A,ATP11C,ATP13A4,BAIAP2,CCDC124,CCNY,CD151,CDV3,COL6A1,COL6A3,CRIM1,CTNNA2,EPN1,FAM120A,FAT4,FN1,FOLR2,GBF1,GJA1,GNA14,GNB4,GPRC5C,HSD17B7,IGFBP2,ITGA3,ITGA6,KCNMA1,KRT19,LRPAP1,MARCKSL1,MFGE8,NCKAP1,NRP1,PARK7,PIGU,PLA2R1,PPP6R3,PRKCD,PRNP,PTK7,PTPRF,PTPRM,RAB5C,RAB8A,RASA4,RFTN1,RHOB,RLTPR,SLC1A4,SLC1A5,SLC25A11,SLC38A1,SLC38A5,SLC7A5,SNX18,SPTAN1,SPTBN1,SRC,STAU1…
GO.0098647	collagen beaded filament	3	6.37e-05	ENSP00000052754,ENSP00000295550,ENSP00000355180	COL6A1,COL6A3,DCN
GO.0071944	cell periphery	74	0.00011	ENSP00000007722,ENSP00000212355,ENSP00000217446,ENSP00000225665,ENSP00000230419,ENSP00000232564,ENSP00000233809,ENSP00000234256,ENSP00000254521,ENSP00000261622,ENSP00000262940,ENSP00000263798,ENSP00000264993,ENSP00000265371,ENSP00000268150,ENSP00000272233,ENSP00000277165,ENSP00000280527,ENSP00000282561,ENSP00000283243,ENSP00000283558,ENSP00000293217,ENSP00000295550,ENSP00000298223,ENSP00000300935…	ABCC1,ACOX1,ACTN1,ADIPOR1,ATP11A,ATP11C,ATP13A4,BAIAP2,CCDC124,CCNY,CD151,CDV3,COL6A1,COL6A3,CRIM1,CTNNA2,EPN1,FAM120A,FAT4,FN1,FOLR2,GBF1,GIPC1,GJA1,GNA14,GNB4,GPRC5C,HSD17B7,IGFBP2,ITGA3,ITGA6,KCNMA1,KRT19,LRPAP1,MARCKSL1,MFGE8,NCKAP1,NRP1,PARK7,PIGU,PLA2R1,PPP6R3,PRKCD,PRNP,PTK7,PTPRF,PTPRM,RAB5C,RAB8A,RASA4,RFTN1,RHOB,RLTPR,SLC1A4,SLC1A5,SLC25A11,SLC38A1,SLC38A5,SLC7A5,SNX18,SPTBN1,SRC,STAU1,…
GO.0016023	cytoplasmic membrane-bounded vesicle	27	0.000135	ENSP00000163416,ENSP00000217426,ENSP00000231061,ENSP00000234256,ENSP00000261735,ENSP00000262544,ENSP00000282561,ENSP00000295440,ENSP00000299705,ENSP00000300935,ENSP00000303585,ENSP00000304565,ENSP00000305647,ENSP00000306253,ENSP00000309141,ENSP00000309415,ENSP00000316338,ENSP00000317332,ENSP00000340698,ENSP00000345689,ENSP00000346839,ENSP00000351926,ENSP00000356540,ENSP00000376403,ENSP00000377941…	ACTN1,AHCY,AP2A1,BAIAP2,CLIP1,CLTB,ERP29,FN1,GIPC1,GJA1,GOLGA5,GPRC5C,ITPR1,MARCH3,NPPC,RAB31,RAB5C,RAB8A,SEC23B,SLC1A4,SLC1A5,SNX18,SPARC,STX11,TF,TMED3,VAMP5
GO.0044422	organelle part	107	0.000157	ENSP00000001008,ENSP00000035307,ENSP00000052754,ENSP00000185150,ENSP00000216297,ENSP00000216442,ENSP00000216780,ENSP00000217446,ENSP00000219473,ENSP00000225665,ENSP00000231061,ENSP00000232564,ENSP00000234256,ENSP00000235521,ENSP00000245046,ENSP00000249269,ENSP00000251646,ENSP00000251809,ENSP00000254521,ENSP00000256366,ENSP00000256545,ENSP00000259253,ENSP00000259818,ENSP00000260731,ENSP00000261183…	ACSL4,ACTN1,AGL,AIFM2,AP2A1,APOA2,ARL1,ARL6IP1,ASNA1,ATAD3A,ATP11A,ATP11C,ATP13A4,ATP6V1D,BAIAP2,BAX,BRI3BP,CALR3,CCDC124,CDC42BPA,CDV3,CHPF2,COL5A1,COL6A1,COL6A3,DCN,DLAT,DNAJA1,DRAM2,EDC4,EMC1,EMC3,EMC7,ERLEC1,ERP29,EXOC7,FAF2,FKBP4,FN1,GC,GIPC1,GNB4,GORAB,GPRC5C,GPX4,H1FX,HMGN1,HNRNPF,HSD17B7,IARS,IMPDH1,ITPR1,JAGN1,KIF11,KRT33B,KRT81,KRT86,LOXL2,LRPAP1,MARCH3,NAPG,NDUFS1,NDUFV1,NRP1,OSBPL8,PC…
GO.0044446	intracellular organelle part	105	0.000172	ENSP00000001008,ENSP00000035307,ENSP00000052754,ENSP00000185150,ENSP00000216297,ENSP00000216442,ENSP00000216780,ENSP00000217446,ENSP00000219473,ENSP00000225665,ENSP00000231061,ENSP00000232564,ENSP00000234256,ENSP00000235521,ENSP00000245046,ENSP00000249269,ENSP00000251646,ENSP00000251809,ENSP00000254521,ENSP00000256366,ENSP00000256545,ENSP00000259253,ENSP00000259818,ENSP00000260731,ENSP00000261183…	ACSL4,ACTN1,AGL,AIFM2,AP2A1,APOA2,ARL1,ARL6IP1,ASNA1,ATAD3A,ATP11A,ATP11C,ATP13A4,ATP6V1D,BAIAP2,BAX,BRI3BP,CALR3,CCDC124,CDC42BPA,CDV3,CHPF2,COL5A1,COL6A1,COL6A3,DCN,DLAT,DNAJA1,DRAM2,EDC4,EMC1,EMC3,EMC7,ERLEC1,ERP29,EXOC7,FAF2,FKBP4,FN1,GC,GNB4,GORAB,GPRC5C,GPX4,H1FX,HMGN1,HNRNPF,HSD17B7,IARS,IMPDH1,ITPR1,JAGN1,KIF11,KRT33B,KRT81,KRT86,LOXL2,LRPAP1,MARCH3,NAPG,NDUFS1,NDUFV1,NRP1,OSBPL8,PCK2,PEX…
GO.0005604	basement membrane	8	0.00019	ENSP00000231061,ENSP00000258341,ENSP00000262768,ENSP00000324101,ENSP00000346839,ENSP00000360882,ENSP00000373783,ENSP00000386896	CD151,COL5A1,FN1,ITGA6,LAMC1,LOXL2,SPARC,TIMP2
GO.0012506	vesicle membrane	16	0.000214	ENSP00000163416,ENSP00000231061,ENSP00000262544,ENSP00000282561,ENSP00000299705,ENSP00000300935,ENSP00000303585,ENSP00000304565,ENSP00000305647,ENSP00000306253,ENSP00000309141,ENSP00000309415,ENSP00000317332,ENSP00000340698,ENSP00000351926,ENSP00000376403	AP2A1,CLIP1,CLTB,GIPC1,GJA1,GOLGA5,GPRC5C,ITPR1,MARCH3,RAB31,RAB8A,SEC23B,SNX18,SPARC,TMED3,VAMP5
GO.0044433	cytoplasmic vesicle part	18	0.000275	ENSP00000163416,ENSP00000231061,ENSP00000262544,ENSP00000282561,ENSP00000299705,ENSP00000300935,ENSP00000303585,ENSP00000304565,ENSP00000305647,ENSP00000306253,ENSP00000309141,ENSP00000309415,ENSP00000317332,ENSP00000346839,ENSP00000351926,ENSP00000376403,ENSP00000377941,ENSP00000385834	ACTN1,AP2A1,CLIP1,CLTB,FN1,GJA1,GOLGA5,GPRC5C,ITPR1,MARCH3,RAB31,RAB8A,SEC23B,SNX18,SPARC,TF,TMED3,VAMP5
GO.0030659	cytoplasmic vesicle membrane	15	0.000518	ENSP00000163416,ENSP00000231061,ENSP00000262544,ENSP00000282561,ENSP00000299705,ENSP00000300935,ENSP00000303585,ENSP00000304565,ENSP00000305647,ENSP00000306253,ENSP00000309141,ENSP00000309415,ENSP00000317332,ENSP00000351926,ENSP00000376403	AP2A1,CLIP1,CLTB,GJA1,GOLGA5,GPRC5C,ITPR1,MARCH3,RAB31,RAB8A,SEC23B,SNX18,SPARC,TMED3,VAMP5
GO.0005829	cytosol	55	0.000648	ENSP00000001008,ENSP00000216190,ENSP00000216442,ENSP00000216479,ENSP00000217426,ENSP00000229319,ENSP00000232219,ENSP00000260731,ENSP00000261622,ENSP00000261772,ENSP00000262027,ENSP00000262940,ENSP00000265175,ENSP00000265371,ENSP00000272233,ENSP00000282561,ENSP00000293288,ENSP00000294724,ENSP00000300935,ENSP00000303585,ENSP00000306788,ENSP00000312370,ENSP00000316338,ENSP00000318016,ENSP00000324101…	AARS,ACTN1,AGL,AHCY,AHSA1,AIFM2,AP2A1,APOA2,ARL6IP1,ATP6V1D,BAIAP2,BAX,CD151,CLIP1,CTNNA2,CTPS1,DNAJA1,EDC4,EEF1E1,EIF1AX,EIF2S2,EIF3D,EXOC7,FAS,FKBP4,FMNL3,GC,GIPC1,GJA1,GPX4,IARS,IMPDH1,KIAA0196,KIF11,LDHB,MARS,NCKAP1,NRP1,PARK7,POR,PRKCD,PRMT1,PSAT1,RAB8A,RASA4,RBP1,RHOB,SEC24B,SLC7A5,SPTAN1,SPTBN1,SRC,STXBP1,TXNIP,TXNRD1
GO.0005615	extracellular space	29	0.000858	ENSP00000052754,ENSP00000205948,ENSP00000212355,ENSP00000226355,ENSP00000231061,ENSP00000233809,ENSP00000246891,ENSP00000251646,ENSP00000258341,ENSP00000262768,ENSP00000263100,ENSP00000265371,ENSP00000267843,ENSP00000268150,ENSP00000295440,ENSP00000295550,ENSP00000295927,ENSP00000312370,ENSP00000330523,ENSP00000346839,ENSP00000356969,ENSP00000369349,ENSP00000371532,ENSP00000373783,ENSP00000377941…	A1BG,ACTN1,AFM,AIFM2,APOA2,APOH,COL6A3,CSN1S1,CTHRC1,DCN,FGF7,FN1,GC,IGFBP2,KRT33B,KRT81,KRT86,LAMC1,LOXL2,MFGE8,NPPC,NRP1,PTX3,RNASET2,SPARC,TF,TGFBR3,TIMP2,VLDLR
GO.0005811	lipid particle	6	0.00116	ENSP00000261942,ENSP00000312370,ENSP00000339787,ENSP00000345689,ENSP00000351035,ENSP00000359000	ACSL4,AIFM2,FAF2,GBF1,HSD17B11,RAB5C
GO.0005789	endoplasmic reticulum membrane	23	0.00135	ENSP00000001008,ENSP00000217446,ENSP00000245046,ENSP00000254521,ENSP00000256545,ENSP00000261942,ENSP00000262544,ENSP00000263798,ENSP00000265175,ENSP00000282561,ENSP00000293288,ENSP00000299705,ENSP00000306106,ENSP00000306253,ENSP00000306788,ENSP00000309430,ENSP00000332756,ENSP00000339182,ENSP00000339787,ENSP00000349887,ENSP00000369127,ENSP00000419970,ENSP00000420608	ACSL4,ARL6IP1,ASNA1,ATP11C,ATP13A4,BAX,DNAJA1,EMC1,EMC3,EMC7,FAF2,FKBP4,GJA1,HSD17B7,ITPR1,JAGN1,PIGS,PIGU,POR,SEC23B,SEC24B,TMED3,TYRO3
GO.0044459	plasma membrane part	42	0.00165	ENSP00000212355,ENSP00000225665,ENSP00000230419,ENSP00000233809,ENSP00000234256,ENSP00000261590,ENSP00000261622,ENSP00000262940,ENSP00000263798,ENSP00000268150,ENSP00000282561,ENSP00000283243,ENSP00000298223,ENSP00000305647,ENSP00000309415,ENSP00000313740,ENSP00000317332,ENSP00000319141,ENSP00000324101,ENSP00000331418,ENSP00000334100,ENSP00000334958,ENSP00000341138,ENSP00000341785,ENSP00000346839…	ABCC1,ADIPOR1,CD151,CLTB,CTNNA2,CYBRD1,DSG2,EPB41L3,EXOC7,FN1,FOLR2,GJA1,GNA14,GPRC5C,IGFBP2,ITGA6,KCNMA1,KRT19,MFGE8,NCKAP1,PLA2R1,PTK7,PTPRF,PTPRM,RASA4,RLTPR,SLC1A4,SLC1A5,SLC25A11,SLC38A1,SLC38A5,SLC7A5,SNX18,SPTAN1,SPTBN1,SRC,TBCD,TF,TGFBR3,TMEM231,TYRO3,VAMP5
GO.0042175	nuclear outer membrane-endoplasmic reticulum membrane network	23	0.00171	ENSP00000001008,ENSP00000217446,ENSP00000245046,ENSP00000254521,ENSP00000256545,ENSP00000261942,ENSP00000262544,ENSP00000263798,ENSP00000265175,ENSP00000282561,ENSP00000293288,ENSP00000299705,ENSP00000306106,ENSP00000306253,ENSP00000306788,ENSP00000309430,ENSP00000332756,ENSP00000339182,ENSP00000339787,ENSP00000349887,ENSP00000369127,ENSP00000419970,ENSP00000420608	ACSL4,ARL6IP1,ASNA1,ATP11C,ATP13A4,BAX,DNAJA1,EMC1,EMC3,EMC7,FAF2,FKBP4,GJA1,HSD17B7,ITPR1,JAGN1,PIGS,PIGU,POR,SEC23B,SEC24B,TMED3,TYRO3
GO.0005740	mitochondrial envelope	19	0.00175	ENSP00000222308,ENSP00000225665,ENSP00000249269,ENSP00000256366,ENSP00000282561,ENSP00000284320,ENSP00000293288,ENSP00000312370,ENSP00000322450,ENSP00000339787,ENSP00000340278,ENSP00000340761,ENSP00000346103,ENSP00000350941,ENSP00000358323,ENSP00000368030,ENSP00000370808,ENSP00000377446,ENSP00000392709	ACSL4,AIFM2,ATAD3A,BAX,BRI3BP,FKBP8,GJA1,GPX4,NDUFS1,NDUFV1,PARK7,PMPCB,SLC25A11,SLC25A6,SRC,SUCLG1,SYNJ2BP,TOMM70A,TXNIP
GO.0005913	cell-cell adherens junction	5	0.00187	ENSP00000282561,ENSP00000331418,ENSP00000361824,ENSP00000377941,ENSP00000418191	ACTN1,CTNNA2,GJA1,PTPRM,SPTAN1
GO.0030120	vesicle coat	5	0.00208	ENSP00000262544,ENSP00000265175,ENSP00000299705,ENSP00000309415,ENSP00000351926	AP2A1,CLTB,SEC23B,SEC24B,TMED3
GO.0098644	complex of collagen trimers	4	0.00256	ENSP00000052754,ENSP00000295550,ENSP00000355180,ENSP00000360882	COL5A1,COL6A1,COL6A3,DCN
GO.0030660	Golgi-associated vesicle membrane	5	0.00284	ENSP00000163416,ENSP00000282561,ENSP00000299705,ENSP00000309415,ENSP00000351926	AP2A1,CLTB,GJA1,GOLGA5,TMED3
GO.0005798	Golgi-associated vesicle	6	0.00332	ENSP00000163416,ENSP00000282561,ENSP00000299705,ENSP00000300935,ENSP00000309415,ENSP00000351926	AP2A1,CLTB,GJA1,GOLGA5,RAB8A,TMED3
GO.0043005	neuron projection	21	0.00365	ENSP00000001008,ENSP00000007722,ENSP00000216962,ENSP00000217426,ENSP00000234256,ENSP00000262768,ENSP00000265371,ENSP00000300935,ENSP00000316338,ENSP00000317332,ENSP00000334100,ENSP00000340278,ENSP00000340698,ENSP00000341138,ENSP00000349259,ENSP00000353030,ENSP00000360922,ENSP00000385806,ENSP00000406209,ENSP00000418191,ENSP00000421725	AHCY,BAIAP2,CTNNA2,EPB41L3,EPN1,EXOC7,FKBP4,GC,GIPC1,ITGA3,KCNMA1,NRP1,PARK7,PTPRF,PYGB,RAB8A,SLC1A4,SNX18,SPTBN1,STAU1,TIMP2
GO.0005739	mitochondrion	32	0.00394	ENSP00000001008,ENSP00000216780,ENSP00000221418,ENSP00000222308,ENSP00000225665,ENSP00000229319,ENSP00000235521,ENSP00000249269,ENSP00000262027,ENSP00000280346,ENSP00000282561,ENSP00000284320,ENSP00000291577,ENSP00000293217,ENSP00000293288,ENSP00000297632,ENSP00000312370,ENSP00000322450,ENSP00000324628,ENSP00000331602,ENSP00000339787,ENSP00000340761,ENSP00000350941,ENSP00000358323,ENSP00000359000…	ACOX1,ACSL4,AIFM2,ATAD3A,BAX,BRI3BP,C21orf33,DLAT,DNAJA1,ECH1,FKBP4,FKBP8,GBF1,GJA1,LDHB,MARS,NAPG,NDUFS1,NDUFV1,PCK2,PMPCB,POR,PRKCD,SCP2,SLC25A11,SLC25A6,SRC,TMEM65,TOMM70A,TXNIP,TXNRD1,WARS2
GO.0005769	early endosome	11	0.00396	ENSP00000219473,ENSP00000265371,ENSP00000272233,ENSP00000282561,ENSP00000283558,ENSP00000304565,ENSP00000309141,ENSP00000318016,ENSP00000345689,ENSP00000356969,ENSP00000385834	APOA2,ATP11A,GJA1,KIAA0196,MARCH3,NRP1,RAB31,RAB5C,RHOB,TF,USP10
GO.0072546	ER membrane protein complex	3	0.00396	ENSP00000245046,ENSP00000256545,ENSP00000420608	EMC1,EMC3,EMC7
GO.0014704	intercalated disc	5	0.00475	ENSP00000261590,ENSP00000282561,ENSP00000305647,ENSP00000361824,ENSP00000377941	ACTN1,DSG2,GJA1,SPTAN1,VAMP5
GO.0044429	mitochondrial part	21	0.0049	ENSP00000216780,ENSP00000222308,ENSP00000225665,ENSP00000235521,ENSP00000249269,ENSP00000256366,ENSP00000280346,ENSP00000282561,ENSP00000284320,ENSP00000293288,ENSP00000312370,ENSP00000322450,ENSP00000339787,ENSP00000340278,ENSP00000340761,ENSP00000346103,ENSP00000350941,ENSP00000358323,ENSP00000368030,ENSP00000370808,ENSP00000392709	ACSL4,AIFM2,ATAD3A,BAX,BRI3BP,DLAT,FKBP8,GJA1,GPX4,NDUFS1,NDUFV1,PARK7,PCK2,PMPCB,SLC25A11,SLC25A6,SRC,SYNJ2BP,TOMM70A,TXNIP,WARS2
GO.0005916	fascia adherens	3	0.00511	ENSP00000282561,ENSP00000361824,ENSP00000377941	ACTN1,GJA1,SPTAN1
GO.0005911	cell-cell junction	12	0.00532	ENSP00000230419,ENSP00000261590,ENSP00000282561,ENSP00000305647,ENSP00000331418,ENSP00000331602,ENSP00000334958,ENSP00000341138,ENSP00000347719,ENSP00000355731,ENSP00000361824,ENSP00000418191	CDC42BPA,CTNNA2,DSG2,EPB41L3,GJA1,PRKCD,PTK7,PTPRM,RLTPR,SPTAN1,TBCD,VAMP5
GO.0044424	intracellular part	145	0.00541	ENSP00000007722,ENSP00000035307,ENSP00000052754,ENSP00000175091,ENSP00000185150,ENSP00000212355,ENSP00000216297,ENSP00000216442,ENSP00000216479,ENSP00000216780,ENSP00000216962,ENSP00000217446,ENSP00000219473,ENSP00000221418,ENSP00000225665,ENSP00000231061,ENSP00000232219,ENSP00000232564,ENSP00000233809,ENSP00000234256,ENSP00000235521,ENSP00000245046,ENSP00000249269,ENSP00000251646,ENSP00000251809…	AARS,ACSL4,ACTN1,AHSA1,AIFM2,AP2A1,APOA2,ARL1,ARL6IP1,ASNA1,ATAD3A,ATP11A,ATP11C,ATP13A4,ATP6V1D,BAX,BRI3BP,C21orf33,CALR3,CCDC124,CCNY,CD151,CDC42BPA,CDV3,CHPF2,COL5A1,COL6A1,COL6A3,COMMD3,CTHRC1,CTPS1,DCN,DLAT,DNAJA1,DRAM2,ECH1,EDC4,EEF1E1,EIF1AX,EIF2S2,EMC1,EMC3,EMC7,EPB41L3,EPN1,ERLEC1,ERP29,EXOC7,FAF2,FAM120A,FAS,FGF7,FMNL3,FN1,G3BP2,GDE1,GIPC1,GJA1,GNA14,GNB4,GORAB,GPRC5C,H1FX,HMGN1,HNRNPF,…
GO.0009986	cell surface	18	0.00629	ENSP00000205948,ENSP00000212355,ENSP00000231061,ENSP00000234256,ENSP00000256366,ENSP00000261590,ENSP00000261735,ENSP00000262768,ENSP00000268150,ENSP00000272233,ENSP00000283243,ENSP00000298223,ENSP00000305647,ENSP00000368752,ENSP00000371532,ENSP00000385806,ENSP00000385834,ENSP00000421922	APOH,DSG2,ERP29,FOLR2,KCNMA1,LRPAP1,MFGE8,PLA2R1,PRNP,RHOB,SLC1A4,SPARC,SYNJ2BP,TF,TGFBR3,TIMP2,VAMP5,VLDLR
GO.0031966	mitochondrial membrane	17	0.00684	ENSP00000222308,ENSP00000225665,ENSP00000249269,ENSP00000256366,ENSP00000282561,ENSP00000284320,ENSP00000293288,ENSP00000312370,ENSP00000322450,ENSP00000339787,ENSP00000340761,ENSP00000346103,ENSP00000350941,ENSP00000368030,ENSP00000370808,ENSP00000377446,ENSP00000392709	ACSL4,AIFM2,ATAD3A,BAX,BRI3BP,FKBP8,GJA1,GPX4,NDUFS1,NDUFV1,PMPCB,SLC25A11,SLC25A6,SRC,SUCLG1,SYNJ2BP,TOMM70A
GO.0098798	mitochondrial protein complex	7	0.00768	ENSP00000280346,ENSP00000284320,ENSP00000293288,ENSP00000322450,ENSP00000370808,ENSP00000377446,ENSP00000392709	BAX,DLAT,NDUFS1,NDUFV1,SLC25A6,SUCLG1,TOMM70A
GO.0098589	membrane region	23	0.00792	ENSP00000229319,ENSP00000233809,ENSP00000261590,ENSP00000261622,ENSP00000282561,ENSP00000319141,ENSP00000334153,ENSP00000340278,ENSP00000341138,ENSP00000346839,ENSP00000347979,ENSP00000349259,ENSP00000350941,ENSP00000354251,ENSP00000368752,ENSP00000371532,ENSP00000381184,ENSP00000382342,ENSP00000385806,ENSP00000385834,ENSP00000386896,ENSP00000406209,ENSP00000418191	ABCC1,CTNNA2,CYBRD1,DSG2,EPB41L3,EPN1,FAS,FN1,GJA1,IGFBP2,ITGA6,KCNMA1,LDHB,NCKAP1,PARK7,PRNP,RFTN1,SLC7A5,SPTBN1,SRC,TF,TMEM231,VLDLR
GO.0005764	lysosome	14	0.0103	ENSP00000052754,ENSP00000216442,ENSP00000232564,ENSP00000282561,ENSP00000283558,ENSP00000286692,ENSP00000309141,ENSP00000324628,ENSP00000332756,ENSP00000345689,ENSP00000350941,ENSP00000355180,ENSP00000421725,ENSP00000422846	ATP11A,ATP11C,ATP6V1D,COL6A1,DCN,DRAM2,GC,GJA1,GNB4,MARCH3,NAPG,RAB5C,RNASET2,SRC
GO.0005622	intracellular	146	0.0137	ENSP00000007722,ENSP00000035307,ENSP00000052754,ENSP00000175091,ENSP00000185150,ENSP00000212355,ENSP00000216297,ENSP00000216442,ENSP00000216479,ENSP00000216780,ENSP00000216962,ENSP00000217446,ENSP00000219473,ENSP00000221418,ENSP00000225665,ENSP00000231061,ENSP00000232219,ENSP00000232564,ENSP00000233809,ENSP00000234256,ENSP00000235521,ENSP00000245046,ENSP00000249269,ENSP00000251646,ENSP00000251809…	AARS,ACSL4,ACTN1,AHSA1,AIFM2,AP2A1,APOA2,ARL1,ARL6IP1,ASNA1,ATAD3A,ATP11A,ATP11C,ATP13A4,ATP6V1D,BAX,BRI3BP,C21orf33,CALR3,CCDC124,CCNY,CD151,CDC42BPA,CDV3,CHPF2,COL5A1,COL6A1,COL6A3,COMMD3,CTHRC1,CTPS1,DCN,DLAT,DNAJA1,DRAM2,ECH1,EDC4,EEF1E1,EIF1AX,EIF2S2,EMC1,EMC3,EMC7,EPB41L3,EPN1,ERLEC1,ERP29,EXOC7,FAF2,FAM120A,FAS,FAT4,FGF7,FMNL3,FN1,G3BP2,GDE1,GIPC1,GJA1,GNA14,GNB4,GORAB,GPRC5C,H1FX,HMGN1,HN…
GO.0005773	vacuole	15	0.0147	ENSP00000052754,ENSP00000216442,ENSP00000232564,ENSP00000282561,ENSP00000283558,ENSP00000286692,ENSP00000309141,ENSP00000324628,ENSP00000332756,ENSP00000345689,ENSP00000350941,ENSP00000355180,ENSP00000365576,ENSP00000421725,ENSP00000422846	ATP11A,ATP11C,ATP6V1D,COL6A1,DCN,DRAM2,GC,GJA1,GNB4,MARCH3,NAPG,RAB5C,RNASET2,SRC,UBQLN1
GO.0030176	integral component of endoplasmic reticulum membrane	6	0.0153	ENSP00000217446,ENSP00000222308,ENSP00000245046,ENSP00000256545,ENSP00000309430,ENSP00000420608	EMC1,EMC3,EMC7,FKBP8,PIGS,PIGU
GO.0031252	cell leading edge	11	0.0153	ENSP00000303585,ENSP00000316338,ENSP00000331418,ENSP00000341138,ENSP00000349259,ENSP00000350941,ENSP00000354251,ENSP00000355731,ENSP00000359000,ENSP00000377941,ENSP00000418191	ACTN1,BAIAP2,CDC42BPA,CLIP1,CTNNA2,EPB41L3,GBF1,NCKAP1,PTPRM,SPTBN1,SRC
GO.0032437	cuticular plate	2	0.0153	ENSP00000349259,ENSP00000361824	SPTAN1,SPTBN1
GO.0043229	intracellular organelle	130	0.0155	ENSP00000001008,ENSP00000035307,ENSP00000052754,ENSP00000175091,ENSP00000185150,ENSP00000216297,ENSP00000216442,ENSP00000216479,ENSP00000216780,ENSP00000217426,ENSP00000217446,ENSP00000219473,ENSP00000221418,ENSP00000225665,ENSP00000229319,ENSP00000231061,ENSP00000232564,ENSP00000233809,ENSP00000234256,ENSP00000235521,ENSP00000245046,ENSP00000249269,ENSP00000251646,ENSP00000251809,ENSP00000254521…	ACSL4,ACTN1,AHCY,AHSA1,AIFM2,AP2A1,APOA2,ARL1,ARL6IP1,ASNA1,ATAD3A,ATP11A,ATP11C,ATP13A4,ATP6V1D,BAX,BRI3BP,C21orf33,CALR3,CCDC124,CCNY,CDC42BPA,CDV3,CHPF2,COL5A1,COL6A1,COL6A3,COMMD3,CTNNA2,DCN,DLAT,DNAJA1,DRAM2,ECH1,EDC4,EEF1E1,EMC1,EMC3,EMC7,EPB41L3,EPN1,ERLEC1,ERP29,EXOC7,FAF2,FAS,FGF7,FKBP4,FN1,GC,GIPC1,GJA1,GNB4,GORAB,GPRC5C,H1FX,HMGN1,HNRNPF,HSD17B11,HSD17B7,IARS,IGFBP2,IMPDH1,ITPR1,JAGN1,…
GO.0031967	organelle envelope	22	0.0157	ENSP00000222308,ENSP00000225665,ENSP00000249269,ENSP00000256366,ENSP00000261183,ENSP00000263798,ENSP00000282561,ENSP00000284320,ENSP00000293288,ENSP00000306253,ENSP00000312370,ENSP00000322450,ENSP00000339787,ENSP00000340278,ENSP00000340761,ENSP00000346103,ENSP00000350941,ENSP00000358323,ENSP00000368030,ENSP00000370808,ENSP00000377446,ENSP00000392709	ACSL4,AIFM2,ATAD3A,BAX,BRI3BP,FKBP8,GJA1,GPX4,ITPR1,NDUFS1,NDUFV1,OSBPL8,PARK7,PMPCB,SLC25A11,SLC25A6,SRC,SUCLG1,SYNJ2BP,TOMM70A,TXNIP,TYRO3
GO.0098552	side of membrane	12	0.0168	ENSP00000007722,ENSP00000212355,ENSP00000262940,ENSP00000268150,ENSP00000298223,ENSP00000317332,ENSP00000347979,ENSP00000350941,ENSP00000365807,ENSP00000369127,ENSP00000385806,ENSP00000386896	DNAJA1,FAS,FOLR2,GNA14,ITGA3,ITGA6,KCNMA1,MFGE8,RASA4,SNX18,SRC,TGFBR3
GO.0031224	intrinsic component of membrane	75	0.0175	ENSP00000007722,ENSP00000035307,ENSP00000163416,ENSP00000175091,ENSP00000212355,ENSP00000217446,ENSP00000222308,ENSP00000225665,ENSP00000230419,ENSP00000234256,ENSP00000245046,ENSP00000254521,ENSP00000256366,ENSP00000256545,ENSP00000261386,ENSP00000261590,ENSP00000261622,ENSP00000262940,ENSP00000263383,ENSP00000263645,ENSP00000263798,ENSP00000265371,ENSP00000280527,ENSP00000282561,ENSP00000283243…	ABCC1,ACSL4,ADIPOR1,AIFM2,ARL6IP1,ATAD3A,ATP11A,ATP11C,ATP13A4,BAX,BRI3BP,CD151,CD81,CHPF2,CRIM1,CYBRD1,DRAM2,DSG2,EMC1,EMC3,EMC7,FAM134A,FAS,FAT4,FKBP8,FOLR2,GDE1,GJA1,GOLGA5,GPRC5C,HSD17B7,ILVBL,ITGA3,ITGA6,ITPR1,JAGN1,KCNMA1,LAPTM4A,LRPAP1,MARCH3,MFSD1,NCKAP1,NRP1,PEX14,PIGS,PIGU,PLA2R1,PRNP,PTK7,PTPRF,PTPRM,RASA4,SDK1,SLC1A4,SLC1A5,SLC25A11,SLC25A6,SLC38A1,SLC38A5,SLC39A10,SLC7A5,SMIM7,STX11,…
GO.0048475	coated membrane	5	0.0175	ENSP00000262544,ENSP00000265175,ENSP00000299705,ENSP00000309415,ENSP00000351926	AP2A1,CLTB,SEC23B,SEC24B,TMED3
GO.0005741	mitochondrial outer membrane	7	0.0181	ENSP00000256366,ENSP00000282561,ENSP00000284320,ENSP00000293288,ENSP00000312370,ENSP00000339787,ENSP00000340761	ACSL4,AIFM2,BAX,BRI3BP,GJA1,SYNJ2BP,TOMM70A
GO.0072562	blood microparticle	6	0.0181	ENSP00000226355,ENSP00000263100,ENSP00000346839,ENSP00000356969,ENSP00000385834,ENSP00000421725	A1BG,AFM,APOA2,FN1,GC,TF
GO.0042765	GPI-anchor transamidase complex	2	0.0215	ENSP00000217446,ENSP00000309430	PIGS,PIGU
GO.0005793	endoplasmic reticulum-Golgi intermediate compartment	5	0.0222	ENSP00000259253,ENSP00000262544,ENSP00000299705,ENSP00000346839,ENSP00000359000	FN1,GBF1,SEC23B,TMED3,UGGT1
GO.0034361	very-low-density lipoprotein particle	3	0.0222	ENSP00000205948,ENSP00000356969,ENSP00000371532	APOA2,APOH,VLDLR
GO.0005768	endosome	17	0.0233	ENSP00000219473,ENSP00000265371,ENSP00000282561,ENSP00000283558,ENSP00000300935,ENSP00000303585,ENSP00000304565,ENSP00000305647,ENSP00000309141,ENSP00000317332,ENSP00000318016,ENSP00000332756,ENSP00000334153,ENSP00000345689,ENSP00000350941,ENSP00000356969,ENSP00000385834	APOA2,ATP11A,ATP11C,CLIP1,GJA1,KIAA0196,MARCH3,NRP1,RAB31,RAB5C,RAB8A,RFTN1,SNX18,SRC,TF,USP10,VAMP5
GO.0044437	vacuolar part	11	0.0233	ENSP00000052754,ENSP00000216442,ENSP00000232564,ENSP00000283558,ENSP00000286692,ENSP00000324628,ENSP00000332756,ENSP00000345689,ENSP00000355180,ENSP00000421725,ENSP00000422846	ATP11A,ATP11C,ATP6V1D,COL6A1,DCN,DRAM2,GC,GNB4,NAPG,RAB5C,RNASET2
GO.0016021	integral component of membrane	72	0.0341	ENSP00000007722,ENSP00000035307,ENSP00000163416,ENSP00000175091,ENSP00000212355,ENSP00000217446,ENSP00000222308,ENSP00000225665,ENSP00000230419,ENSP00000234256,ENSP00000245046,ENSP00000254521,ENSP00000256366,ENSP00000256545,ENSP00000261386,ENSP00000261590,ENSP00000261622,ENSP00000263383,ENSP00000263645,ENSP00000263798,ENSP00000265371,ENSP00000280527,ENSP00000282561,ENSP00000283243,ENSP00000283558…	ABCC1,ACSL4,ADIPOR1,AIFM2,ARL6IP1,ATAD3A,ATP11A,ATP11C,ATP13A4,BAX,BRI3BP,CD151,CD81,CHPF2,CRIM1,CYBRD1,DRAM2,DSG2,EMC1,EMC3,EMC7,FAM134A,FAS,FAT4,FKBP8,GDE1,GJA1,GOLGA5,GPRC5C,HSD17B7,ILVBL,ITGA3,ITGA6,ITPR1,JAGN1,KCNMA1,LAPTM4A,LRPAP1,MARCH3,MFSD1,NCKAP1,NRP1,PEX14,PIGS,PIGU,PLA2R1,PTK7,PTPRF,PTPRM,SDK1,SLC1A4,SLC1A5,SLC25A11,SLC25A6,SLC38A1,SLC38A5,SLC39A10,SLC7A5,SMIM7,STX11,SYNJ2BP,TGFBR3,TM…
GO.0044463	cell projection part	18	0.0341	ENSP00000001008,ENSP00000262768,ENSP00000300935,ENSP00000309415,ENSP00000316338,ENSP00000317332,ENSP00000319141,ENSP00000334100,ENSP00000340698,ENSP00000341138,ENSP00000349259,ENSP00000350941,ENSP00000351926,ENSP00000354251,ENSP00000381184,ENSP00000385806,ENSP00000406209,ENSP00000418191	AP2A1,BAIAP2,CLTB,CTNNA2,CYBRD1,EPB41L3,EPN1,EXOC7,FKBP4,GIPC1,KCNMA1,NCKAP1,RAB8A,SNX18,SPTBN1,SRC,TIMP2,TMEM231
GO.0070161	anchoring junction	12	0.0341	ENSP00000007722,ENSP00000230419,ENSP00000261590,ENSP00000263895,ENSP00000265371,ENSP00000324101,ENSP00000331418,ENSP00000347719,ENSP00000354251,ENSP00000361824,ENSP00000384312,ENSP00000386896	CD151,DSG2,ITGA3,ITGA6,NCKAP1,NRP1,PTK7,PTPRM,RND3,SPTAN1,TBCD,TRIOBP
GO.0005581	collagen trimer	5	0.0377	ENSP00000052754,ENSP00000295550,ENSP00000330523,ENSP00000355180,ENSP00000360882	COL5A1,COL6A1,COL6A3,CTHRC1,DCN
GO.0005578	proteinaceous extracellular matrix	10	0.039	ENSP00000212355,ENSP00000231061,ENSP00000258341,ENSP00000295550,ENSP00000324101,ENSP00000330523,ENSP00000355180,ENSP00000373783,ENSP00000386896,ENSP00000398736	CD151,COL6A1,COL6A3,CTHRC1,CYR61,ITGA6,LAMC1,LOXL2,SPARC,TGFBR3
GO.0030140	trans-Golgi network transport vesicle	3	0.039	ENSP00000300935,ENSP00000309415,ENSP00000351926	AP2A1,CLTB,RAB8A
GO.0043231	intracellular membrane-bounded organelle	120	0.0393	ENSP00000001008,ENSP00000035307,ENSP00000052754,ENSP00000175091,ENSP00000185150,ENSP00000216297,ENSP00000216442,ENSP00000216479,ENSP00000216780,ENSP00000217426,ENSP00000217446,ENSP00000219473,ENSP00000221418,ENSP00000225665,ENSP00000229319,ENSP00000231061,ENSP00000232564,ENSP00000234256,ENSP00000235521,ENSP00000245046,ENSP00000249269,ENSP00000251809,ENSP00000254521,ENSP00000256545,ENSP00000259253…	ACSL4,ACTN1,AHCY,AHSA1,AIFM2,AP2A1,APOA2,ARL1,ARL6IP1,ASNA1,ATAD3A,ATP11A,ATP11C,ATP13A4,ATP6V1D,BAX,BRI3BP,C21orf33,CALR3,CCNY,CDV3,CHPF2,CLIP1,COL5A1,COL6A1,COL6A3,COMMD3,DCN,DLAT,DNAJA1,DRAM2,ECH1,EDC4,EEF1E1,EMC1,EMC3,EMC7,EPN1,ERLEC1,ERP29,FAF2,FAS,FGF7,FKBP4,FN1,GC,GIPC1,GJA1,GNB4,GORAB,GPRC5C,H1FX,HMGN1,HNRNPF,HSD17B7,IARS,IMPDH1,ITPR1,JAGN1,KCNMA1,KIAA0196,LAPTM4A,LDHB,LOXL2,MARCH3,MARS,N…
GO.0031301	integral component of organelle membrane	8	0.0433	ENSP00000217446,ENSP00000222308,ENSP00000245046,ENSP00000256366,ENSP00000256545,ENSP00000305647,ENSP00000309430,ENSP00000420608	EMC1,EMC3,EMC7,FKBP8,PIGS,PIGU,SYNJ2BP,VAMP5

## Sheet: Biological process
#pathway ID	pathway description	observed gene count	false discovery rate	matching proteins in your network (IDs)	matching proteins in your network (labels)
GO.0051179	localization	87	1.22e-09	ENSP00000001008,ENSP00000175091,ENSP00000205948,ENSP00000212355,ENSP00000225665,ENSP00000226355,ENSP00000230419,ENSP00000231061,ENSP00000232219,ENSP00000234256,ENSP00000249269,ENSP00000256366,ENSP00000258341,ENSP00000259818,ENSP00000261183,ENSP00000261622,ENSP00000261942,ENSP00000263645,ENSP00000263798,ENSP00000265371,ENSP00000267843,ENSP00000268150,ENSP00000282561,ENSP00000283243,ENSP00000283558…	ABCC1,ACSL4,ACTN1,AFM,AP2A1,APOA2,APOH,ARL6IP1,ASNA1,ATP11A,ATP11C,BAIAP2,BAX,CD151,CD81,CLIP1,CLTB,COL5A1,COMMD3,CTHRC1,CTNNA2,CYBRD1,CYR61,EIF2S2,EPB41L3,EPN1,EXOC7,FAF2,FGF7,FKBP4,FMNL3,FN1,FOLR2,G3BP2,GBF1,GIPC1,GJA1,ITGA6,ITPR1,KIAA0196,LAMC1,LAPTM4A,LRPAP1,MARCH3,MFGE8,MFSD1,NAPG,NRP1,OSBPL8,PARK7,PEX14,PLA2R1,PMPCB,PRKCD,PTK7,PTPRF,PTX3,RAB31,RAB5C,RAB8A,RBP1,RFTN1,RLTPR,SCP2,SH3PXD2B,SLC1…
GO.0051234	establishment of localization	75	5.77e-09	ENSP00000001008,ENSP00000175091,ENSP00000205948,ENSP00000225665,ENSP00000226355,ENSP00000231061,ENSP00000232219,ENSP00000234256,ENSP00000249269,ENSP00000261183,ENSP00000261622,ENSP00000261942,ENSP00000263798,ENSP00000265371,ENSP00000267843,ENSP00000268150,ENSP00000282561,ENSP00000283243,ENSP00000283558,ENSP00000284320,ENSP00000293288,ENSP00000295927,ENSP00000298223,ENSP00000299705,ENSP00000300935…	ABCC1,ACSL4,ACTN1,AFM,AP2A1,APOA2,APOH,ARL6IP1,ASNA1,ATP11A,ATP11C,BAIAP2,BAX,CDC42BPA,CLIP1,CLTB,COMMD3,CYBRD1,DNAJA1,EIF2S2,EPN1,EXOC7,FAF2,FGF7,FKBP4,FN1,FOLR2,G3BP2,GBF1,GIPC1,GJA1,ITPR1,JAGN1,KIAA0196,LAPTM4A,LOXL2,LRPAP1,MARCH3,MFGE8,MFSD1,NAPG,NCKAP1,NRP1,OSBPL8,PARK7,PEX14,PLA2R1,PMPCB,PRKCD,PTX3,RAB31,RAB5C,RAB8A,RBP1,RFTN1,RLTPR,SCP2,SLC1A4,SLC1A5,SLC25A11,SLC25A6,SLC38A1,SLC38A5,SLC7A5…
GO.1902578	single-organism localization	69	5.77e-09	ENSP00000001008,ENSP00000205948,ENSP00000225665,ENSP00000226355,ENSP00000231061,ENSP00000234256,ENSP00000246891,ENSP00000249269,ENSP00000256366,ENSP00000261183,ENSP00000261622,ENSP00000261735,ENSP00000261942,ENSP00000262544,ENSP00000263798,ENSP00000265175,ENSP00000267843,ENSP00000268150,ENSP00000272233,ENSP00000282561,ENSP00000283558,ENSP00000284320,ENSP00000293288,ENSP00000295927,ENSP00000298223…	ABCC1,ACSL4,ACTN1,AFM,AP2A1,APOA2,APOH,ARL6IP1,ASNA1,ATP11A,ATP11C,BAIAP2,BAX,CLIP1,COMMD3,CSN1S1,CYBRD1,EIF2S2,EPB41L3,ERP29,EXOC7,FAF2,FGF7,FKBP4,FN1,FOLR2,G3BP2,GBF1,GIPC1,GJA1,ITPR1,JAGN1,MFGE8,MFSD1,NAPG,NCKAP1,OSBPL8,PARK7,PEX14,PMPCB,PRKCD,PTX3,RAB31,RAB5C,RAB8A,RFTN1,RHOB,SCP2,SEC23B,SEC24B,SH3PXD2B,SLC1A4,SLC1A5,SLC25A11,SLC25A6,SLC38A1,SLC38A5,SLC7A5,SNX18,SPARC,SPTBN1,SRC,SYNJ2BP,TBC1D…
GO.0006810	transport	73	8.18e-09	ENSP00000001008,ENSP00000175091,ENSP00000205948,ENSP00000225665,ENSP00000226355,ENSP00000231061,ENSP00000232219,ENSP00000234256,ENSP00000249269,ENSP00000261183,ENSP00000261622,ENSP00000261942,ENSP00000263798,ENSP00000265371,ENSP00000267843,ENSP00000268150,ENSP00000282561,ENSP00000283243,ENSP00000283558,ENSP00000284320,ENSP00000293288,ENSP00000295927,ENSP00000298223,ENSP00000299705,ENSP00000300935…	ABCC1,ACSL4,ACTN1,AFM,AP2A1,APOA2,APOH,ARL6IP1,ASNA1,ATP11A,ATP11C,BAIAP2,BAX,CLIP1,CLTB,COMMD3,CYBRD1,DNAJA1,EIF2S2,EPN1,EXOC7,FAF2,FGF7,FKBP4,FN1,FOLR2,G3BP2,GBF1,GIPC1,GJA1,ITPR1,JAGN1,KIAA0196,LAPTM4A,LOXL2,LRPAP1,MARCH3,MFGE8,MFSD1,NAPG,NCKAP1,NRP1,OSBPL8,PARK7,PEX14,PLA2R1,PMPCB,PRKCD,PTX3,RAB31,RAB5C,RAB8A,RBP1,RFTN1,SCP2,SLC1A4,SLC1A5,SLC25A11,SLC25A6,SLC38A1,SLC38A5,SLC7A5,SPARC,SPTBN1,S…
GO.0044765	single-organism transport	65	1.51e-08	ENSP00000001008,ENSP00000205948,ENSP00000225665,ENSP00000226355,ENSP00000231061,ENSP00000234256,ENSP00000246891,ENSP00000249269,ENSP00000261183,ENSP00000261622,ENSP00000261735,ENSP00000261942,ENSP00000262544,ENSP00000263798,ENSP00000265175,ENSP00000267843,ENSP00000268150,ENSP00000272233,ENSP00000282561,ENSP00000283558,ENSP00000284320,ENSP00000293288,ENSP00000295927,ENSP00000298223,ENSP00000300935…	ABCC1,ACSL4,ACTN1,AFM,AP2A1,APOA2,APOH,ARL6IP1,ASNA1,ATP11A,ATP11C,BAIAP2,BAX,CLIP1,COMMD3,CSN1S1,CYBRD1,EIF2S2,ERP29,EXOC7,FAF2,FGF7,FKBP4,FN1,FOLR2,GBF1,GIPC1,GJA1,ITPR1,JAGN1,MFGE8,MFSD1,NAPG,NCKAP1,OSBPL8,PARK7,PEX14,PMPCB,PRKCD,PTX3,RAB31,RAB5C,RAB8A,RFTN1,RHOB,SCP2,SEC23B,SEC24B,SLC1A4,SLC1A5,SLC25A11,SLC25A6,SLC38A1,SLC38A5,SLC7A5,SNX18,SPARC,SPTBN1,SRC,TBC1D10B,TOMM70A,TXLNA,TXNIP,TYRO3,V…
GO.0070727	cellular macromolecule localization	38	3.73e-08	ENSP00000216442,ENSP00000249269,ENSP00000261183,ENSP00000261636,ENSP00000261735,ENSP00000261942,ENSP00000262544,ENSP00000265175,ENSP00000265371,ENSP00000267843,ENSP00000272233,ENSP00000284320,ENSP00000293288,ENSP00000300935,ENSP00000303585,ENSP00000304565,ENSP00000305647,ENSP00000306788,ENSP00000309415,ENSP00000309714,ENSP00000317332,ENSP00000324628,ENSP00000334153,ENSP00000340698,ENSP00000341138…	AP2A1,ARL1,ARL6IP1,ASNA1,ATP6V1D,BAX,CLIP1,CLTB,DNAJA1,EPB41L3,ERP29,FAF2,FGF7,G3BP2,GBF1,GIPC1,NAPG,NRP1,OSBPL8,PEX14,PMPCB,RAB31,RAB5C,RAB8A,RFTN1,RHOB,SCP2,SEC23B,SEC24B,SH3PXD2B,SLC25A6,SNX18,SPTBN1,STAU1,STX11,TOMM70A,TXNIP,VAMP5
GO.0034613	cellular protein localization	37	1.09e-07	ENSP00000216442,ENSP00000249269,ENSP00000261183,ENSP00000261636,ENSP00000261735,ENSP00000261942,ENSP00000262544,ENSP00000265175,ENSP00000265371,ENSP00000267843,ENSP00000272233,ENSP00000284320,ENSP00000293288,ENSP00000300935,ENSP00000303585,ENSP00000304565,ENSP00000305647,ENSP00000306788,ENSP00000309415,ENSP00000309714,ENSP00000317332,ENSP00000324628,ENSP00000334153,ENSP00000340698,ENSP00000341138…	AP2A1,ARL1,ARL6IP1,ASNA1,ATP6V1D,BAX,CLIP1,CLTB,DNAJA1,EPB41L3,ERP29,FAF2,FGF7,G3BP2,GBF1,GIPC1,NAPG,NRP1,OSBPL8,PEX14,PMPCB,RAB31,RAB5C,RAB8A,RFTN1,RHOB,SCP2,SEC23B,SEC24B,SH3PXD2B,SLC25A6,SNX18,SPTBN1,STX11,TOMM70A,TXNIP,VAMP5
GO.0033036	macromolecule localization	51	1.4e-07	ENSP00000001008,ENSP00000205948,ENSP00000216442,ENSP00000249269,ENSP00000261183,ENSP00000261636,ENSP00000261942,ENSP00000262544,ENSP00000263645,ENSP00000265175,ENSP00000265371,ENSP00000267843,ENSP00000272233,ENSP00000283558,ENSP00000284320,ENSP00000293288,ENSP00000299705,ENSP00000300935,ENSP00000303585,ENSP00000304565,ENSP00000305647,ENSP00000306106,ENSP00000306788,ENSP00000309415,ENSP00000309714…	ACSL4,APOA2,APOH,ARL1,ARL6IP1,ASNA1,ATP11A,ATP11C,ATP6V1D,BAX,CD81,CLIP1,CLTB,DNAJA1,EPB41L3,EXOC7,FAF2,FGF7,FKBP4,G3BP2,GBF1,GIPC1,JAGN1,KIAA0196,NAPG,NCKAP1,NRP1,OSBPL8,PEX14,PMPCB,RAB31,RAB5C,RAB8A,RFTN1,RHOB,RLTPR,SCP2,SEC23B,SEC24B,SH3PXD2B,SLC25A6,SNX18,SPTBN1,STAU1,STX11,TF,TMED3,TOMM70A,TXNIP,VAMP5,VLDLR
GO.0008104	protein localization	45	2.86e-07	ENSP00000001008,ENSP00000216442,ENSP00000249269,ENSP00000261183,ENSP00000261636,ENSP00000261942,ENSP00000262544,ENSP00000263645,ENSP00000265175,ENSP00000265371,ENSP00000267843,ENSP00000272233,ENSP00000284320,ENSP00000293288,ENSP00000299705,ENSP00000300935,ENSP00000303585,ENSP00000304565,ENSP00000305647,ENSP00000306106,ENSP00000306788,ENSP00000309415,ENSP00000309714,ENSP00000317332,ENSP00000318016…	ARL1,ARL6IP1,ASNA1,ATP6V1D,BAX,CD81,CLIP1,CLTB,DNAJA1,EPB41L3,EXOC7,FAF2,FGF7,FKBP4,G3BP2,GBF1,GIPC1,JAGN1,KIAA0196,NAPG,NCKAP1,NRP1,OSBPL8,PEX14,PMPCB,RAB31,RAB5C,RAB8A,RFTN1,RHOB,RLTPR,SCP2,SEC23B,SEC24B,SH3PXD2B,SLC25A6,SNX18,SPTBN1,STX11,TF,TMED3,TOMM70A,TXNIP,VAMP5,VLDLR
GO.0040011	locomotion	37	2.86e-07	ENSP00000212355,ENSP00000230419,ENSP00000258341,ENSP00000259818,ENSP00000261622,ENSP00000263645,ENSP00000263798,ENSP00000265371,ENSP00000267843,ENSP00000272233,ENSP00000293288,ENSP00000295550,ENSP00000306106,ENSP00000324101,ENSP00000330523,ENSP00000331418,ENSP00000334958,ENSP00000335655,ENSP00000340698,ENSP00000346839,ENSP00000349259,ENSP00000350941,ENSP00000351926,ENSP00000353030,ENSP00000354251…	AP2A1,BAX,CD151,CD81,CDC42BPA,COL5A1,COL6A1,COL6A3,CTHRC1,CTNNA2,CYR61,DNAJA1,FGF7,FMNL3,FN1,GBF1,GIPC1,ITGA6,JAGN1,LAMC1,LOXL2,NCKAP1,NRP1,PRNP,PTK7,PTPRF,PTPRM,RHOB,RLTPR,SLC1A5,SLC7A5,SPTAN1,SPTBN1,SRC,TGFBR3,TUBB2B,TYRO3
GO.0071702	organic substance transport	48	2.86e-07	ENSP00000205948,ENSP00000216442,ENSP00000225665,ENSP00000234256,ENSP00000249269,ENSP00000261183,ENSP00000261622,ENSP00000261942,ENSP00000262544,ENSP00000265175,ENSP00000272233,ENSP00000282561,ENSP00000283558,ENSP00000284320,ENSP00000298223,ENSP00000299705,ENSP00000300935,ENSP00000303585,ENSP00000304565,ENSP00000305647,ENSP00000306106,ENSP00000306788,ENSP00000309415,ENSP00000313740,ENSP00000317332…	ACSL4,APOA2,APOH,ARL6IP1,ATP11A,ATP11C,ATP6V1D,CLIP1,CLTB,EXOC7,FAF2,FOLR2,G3BP2,GBF1,GIPC1,GJA1,JAGN1,KIAA0196,NAPG,OSBPL8,PARK7,PEX14,PMPCB,RAB31,RAB5C,RAB8A,RFTN1,RHOB,SCP2,SEC23B,SEC24B,SLC1A4,SLC1A5,SLC25A11,SLC25A6,SLC38A1,SLC38A5,SLC7A5,SNX18,SPTBN1,STX11,STXBP1,TF,TMED3,TOMM70A,TXNIP,VAMP5,VLDLR
GO.0006928	movement of cell or subcellular component	36	1.46e-05	ENSP00000212355,ENSP00000230419,ENSP00000258341,ENSP00000259818,ENSP00000260731,ENSP00000261622,ENSP00000263798,ENSP00000265371,ENSP00000272233,ENSP00000293288,ENSP00000295550,ENSP00000306106,ENSP00000324101,ENSP00000330523,ENSP00000331418,ENSP00000334958,ENSP00000335655,ENSP00000340698,ENSP00000346839,ENSP00000349016,ENSP00000349259,ENSP00000350941,ENSP00000351926,ENSP00000353030,ENSP00000354251…	AP2A1,BAX,CD151,CDC42BPA,COL5A1,COL6A1,COL6A3,CTHRC1,CTNNA2,CYR61,DNAJA1,FMNL3,FN1,GBF1,GIPC1,ITGA6,JAGN1,KIF11,LAMC1,LOXL2,NCKAP1,NRP1,PEX14,PRNP,PTK7,PTPRF,PTPRM,RHOB,RLTPR,SLC7A5,SPTAN1,SPTBN1,SRC,TGFBR3,TUBB2B,TYRO3
GO.0016192	vesicle-mediated transport	33	1.59e-05	ENSP00000231061,ENSP00000263798,ENSP00000265175,ENSP00000268150,ENSP00000283243,ENSP00000295927,ENSP00000300935,ENSP00000304565,ENSP00000306106,ENSP00000306253,ENSP00000309141,ENSP00000309415,ENSP00000316338,ENSP00000316990,ENSP00000317332,ENSP00000324628,ENSP00000331602,ENSP00000334100,ENSP00000345689,ENSP00000346839,ENSP00000349259,ENSP00000350941,ENSP00000351926,ENSP00000354251,ENSP00000359000…	ACTN1,AP2A1,BAIAP2,CLTB,EPN1,EXOC7,FN1,GBF1,ITPR1,JAGN1,LOXL2,LRPAP1,MARCH3,MFGE8,NAPG,NCKAP1,PLA2R1,PRKCD,PTX3,RAB31,RAB5C,RAB8A,SEC24B,SNX18,SPARC,SPTBN1,SRC,TBC1D10B,TF,TRAPPC5,TXLNA,TYRO3,VLDLR
GO.0016477	cell migration	25	8.48e-05	ENSP00000212355,ENSP00000230419,ENSP00000258341,ENSP00000259818,ENSP00000261622,ENSP00000263798,ENSP00000265371,ENSP00000293288,ENSP00000306106,ENSP00000324101,ENSP00000330523,ENSP00000334958,ENSP00000335655,ENSP00000340698,ENSP00000346839,ENSP00000350941,ENSP00000353030,ENSP00000354251,ENSP00000355731,ENSP00000359000,ENSP00000360882,ENSP00000373783,ENSP00000386896,ENSP00000398736,ENSP00000418191	BAX,CD151,CDC42BPA,COL5A1,CTHRC1,CTNNA2,CYR61,FMNL3,FN1,GBF1,GIPC1,ITGA6,JAGN1,LAMC1,LOXL2,NCKAP1,NRP1,PTK7,PTPRF,RLTPR,SLC7A5,SRC,TGFBR3,TUBB2B,TYRO3
GO.0030030	cell projection organization	29	8.48e-05	ENSP00000007722,ENSP00000216442,ENSP00000251809,ENSP00000258341,ENSP00000265175,ENSP00000265371,ENSP00000272233,ENSP00000282561,ENSP00000295550,ENSP00000300935,ENSP00000330523,ENSP00000331418,ENSP00000339787,ENSP00000341138,ENSP00000349259,ENSP00000350941,ENSP00000351926,ENSP00000353030,ENSP00000354251,ENSP00000355180,ENSP00000360882,ENSP00000361824,ENSP00000368752,ENSP00000371532,ENSP00000377862…	ACSL4,AP2A1,ATP6V1D,COL5A1,COL6A1,COL6A3,CTHRC1,CTNNA2,EPB41L3,FAT4,GJA1,ITGA3,ITGA6,LAMC1,NCKAP1,NRP1,PRMT1,PRNP,PTPRF,PTPRM,RAB8A,RHOB,SEC24B,SPAG1,SPTAN1,SPTBN1,SRC,TMEM231,VLDLR
GO.0045184	establishment of protein localization	34	9.36e-05	ENSP00000216442,ENSP00000249269,ENSP00000261942,ENSP00000262544,ENSP00000265175,ENSP00000272233,ENSP00000284320,ENSP00000293288,ENSP00000299705,ENSP00000300935,ENSP00000303585,ENSP00000304565,ENSP00000305647,ENSP00000306106,ENSP00000306788,ENSP00000309415,ENSP00000317332,ENSP00000318016,ENSP00000324628,ENSP00000334100,ENSP00000334153,ENSP00000334958,ENSP00000340698,ENSP00000345689,ENSP00000349016…	ARL6IP1,ASNA1,ATP6V1D,BAX,CLIP1,CLTB,EXOC7,FAF2,GBF1,GIPC1,JAGN1,KIAA0196,NAPG,PEX14,PMPCB,RAB31,RAB5C,RAB8A,RFTN1,RHOB,RLTPR,SEC23B,SEC24B,SLC25A6,SNX18,SPTBN1,STX11,STXBP1,TF,TMED3,TOMM70A,TXNIP,VAMP5,VLDLR
GO.0048870	cell motility	26	9.36e-05	ENSP00000212355,ENSP00000230419,ENSP00000258341,ENSP00000259818,ENSP00000261622,ENSP00000263798,ENSP00000265371,ENSP00000293288,ENSP00000306106,ENSP00000324101,ENSP00000330523,ENSP00000334958,ENSP00000335655,ENSP00000340698,ENSP00000346839,ENSP00000350941,ENSP00000353030,ENSP00000354251,ENSP00000355731,ENSP00000359000,ENSP00000360882,ENSP00000369127,ENSP00000373783,ENSP00000386896,ENSP00000398736…	BAX,CD151,CDC42BPA,COL5A1,CTHRC1,CTNNA2,CYR61,DNAJA1,FMNL3,FN1,GBF1,GIPC1,ITGA6,JAGN1,LAMC1,LOXL2,NCKAP1,NRP1,PTK7,PTPRF,RLTPR,SLC7A5,SRC,TGFBR3,TUBB2B,TYRO3
GO.0051674	localization of cell	26	9.36e-05	ENSP00000212355,ENSP00000230419,ENSP00000258341,ENSP00000259818,ENSP00000261622,ENSP00000263798,ENSP00000265371,ENSP00000293288,ENSP00000306106,ENSP00000324101,ENSP00000330523,ENSP00000334958,ENSP00000335655,ENSP00000340698,ENSP00000346839,ENSP00000350941,ENSP00000353030,ENSP00000354251,ENSP00000355731,ENSP00000359000,ENSP00000360882,ENSP00000369127,ENSP00000373783,ENSP00000386896,ENSP00000398736…	BAX,CD151,CDC42BPA,COL5A1,CTHRC1,CTNNA2,CYR61,DNAJA1,FMNL3,FN1,GBF1,GIPC1,ITGA6,JAGN1,LAMC1,LOXL2,NCKAP1,NRP1,PTK7,PTPRF,RLTPR,SLC7A5,SRC,TGFBR3,TUBB2B,TYRO3
GO.0016043	cellular component organization	77	0.000105	ENSP00000001008,ENSP00000052754,ENSP00000163416,ENSP00000212355,ENSP00000216190,ENSP00000216297,ENSP00000216442,ENSP00000230419,ENSP00000231061,ENSP00000249269,ENSP00000251809,ENSP00000256366,ENSP00000258341,ENSP00000259818,ENSP00000261183,ENSP00000261590,ENSP00000261636,ENSP00000261942,ENSP00000262768,ENSP00000263798,ENSP00000263895,ENSP00000265371,ENSP00000267843,ENSP00000268150,ENSP00000272233…	ACOX1,ACSL4,AIFM2,AP2A1,APOA2,ARL1,ARL6IP1,ASNA1,ATP11A,ATP11C,ATP6V1D,BAX,CD151,COL5A1,COL6A1,COL6A3,CTHRC1,CTNNA2,CYR61,DCN,DSG2,EIF3D,EPB41L3,EXOC7,FAF2,FAT4,FGF7,FKBP4,GBF1,GOLGA5,GPX4,H1FX,HMGN1,JAGN1,KIAA0196,KRT19,LAMC1,LOXL2,MFGE8,NAPG,NCKAP1,NDUFS1,NRP1,OSBPL8,PARK7,PEX14,PMPCB,PRKCD,PRMT1,PTK7,PTPRF,PTPRM,RAB31,RAB8A,RFTN1,RHOB,RND3,SH3PXD2B,SLC25A6,SNX18,SPAG1,SPARC,SPTAN1,SPTBN1,STX11…
GO.0006886	intracellular protein transport	24	0.00013	ENSP00000249269,ENSP00000261735,ENSP00000261942,ENSP00000262544,ENSP00000265175,ENSP00000272233,ENSP00000284320,ENSP00000300935,ENSP00000303585,ENSP00000304565,ENSP00000305647,ENSP00000306788,ENSP00000309415,ENSP00000317332,ENSP00000324628,ENSP00000334153,ENSP00000340698,ENSP00000345689,ENSP00000349016,ENSP00000349259,ENSP00000351926,ENSP00000356540,ENSP00000358323,ENSP00000370808	AP2A1,ARL6IP1,CLIP1,CLTB,ERP29,FAF2,GIPC1,NAPG,PEX14,PMPCB,RAB31,RAB5C,RAB8A,RFTN1,RHOB,SEC23B,SEC24B,SLC25A6,SNX18,SPTBN1,STX11,TOMM70A,TXNIP,VAMP5
GO.0043254	regulation of protein complex assembly	15	0.000192	ENSP00000001008,ENSP00000265175,ENSP00000293288,ENSP00000303585,ENSP00000316338,ENSP00000331602,ENSP00000340278,ENSP00000347719,ENSP00000347979,ENSP00000349016,ENSP00000349259,ENSP00000350941,ENSP00000361824,ENSP00000362399,ENSP00000384312	BAIAP2,BAX,CLIP1,FAS,FKBP4,PARK7,PEX14,PRKCD,SEC24B,SPTAN1,SPTBN1,SRC,STXBP1,TBCD,TRIOBP
GO.0015711	organic anion transport	16	0.000227	ENSP00000225665,ENSP00000234256,ENSP00000261622,ENSP00000282561,ENSP00000283558,ENSP00000298223,ENSP00000313740,ENSP00000332756,ENSP00000339787,ENSP00000340698,ENSP00000356969,ENSP00000360569,ENSP00000362399,ENSP00000370808,ENSP00000381634,ENSP00000444408	ACSL4,APOA2,ATP11A,ATP11C,FOLR2,GIPC1,GJA1,SCP2,SLC1A4,SLC1A5,SLC25A11,SLC25A6,SLC38A1,SLC38A5,SLC7A5,STXBP1
GO.0051641	cellular localization	44	0.000249	ENSP00000216442,ENSP00000231061,ENSP00000249269,ENSP00000256366,ENSP00000261183,ENSP00000261942,ENSP00000262544,ENSP00000263798,ENSP00000265371,ENSP00000267843,ENSP00000284320,ENSP00000293288,ENSP00000300935,ENSP00000303585,ENSP00000304565,ENSP00000306003,ENSP00000306106,ENSP00000306253,ENSP00000306788,ENSP00000309415,ENSP00000309714,ENSP00000324628,ENSP00000334100,ENSP00000334153,ENSP00000340698…	ACTN1,AP2A1,ARL6IP1,ASNA1,ATP5I,ATP6V1D,BAX,CDC42BPA,CLIP1,CLTB,DNAJA1,EPB41L3,EXOC7,FAF2,FGF7,FN1,G3BP2,GBF1,GIPC1,ITPR1,JAGN1,NAPG,NRP1,OSBPL8,PEX14,PMPCB,RAB31,RAB5C,RAB8A,RFTN1,SCP2,SEC23B,SH3PXD2B,SLC25A6,SPARC,SPTBN1,STAU1,SYNJ2BP,TBC1D10B,TF,TOMM70A,TXLNA,TXNIP,TYRO3
GO.0006897	endocytosis	19	0.000301	ENSP00000231061,ENSP00000263798,ENSP00000268150,ENSP00000283243,ENSP00000295927,ENSP00000304565,ENSP00000306253,ENSP00000309141,ENSP00000309415,ENSP00000316338,ENSP00000317332,ENSP00000331602,ENSP00000350941,ENSP00000351926,ENSP00000354251,ENSP00000371532,ENSP00000373783,ENSP00000406209,ENSP00000421922	AP2A1,BAIAP2,CLTB,EPN1,ITPR1,LOXL2,LRPAP1,MARCH3,MFGE8,NCKAP1,PLA2R1,PRKCD,PTX3,RAB31,SNX18,SPARC,SRC,TYRO3,VLDLR
GO.0032989	cellular component morphogenesis	28	0.000362	ENSP00000212355,ENSP00000216442,ENSP00000251809,ENSP00000258341,ENSP00000263798,ENSP00000265175,ENSP00000265371,ENSP00000272233,ENSP00000282561,ENSP00000293288,ENSP00000295550,ENSP00000300935,ENSP00000316338,ENSP00000331418,ENSP00000341138,ENSP00000346839,ENSP00000349259,ENSP00000351926,ENSP00000355124,ENSP00000355180,ENSP00000360882,ENSP00000361824,ENSP00000368752,ENSP00000371532,ENSP00000373783…	ACTN1,AP2A1,ATP6V1D,BAIAP2,BAX,COL5A1,COL6A1,COL6A3,CTNNA2,EPB41L3,FN1,GJA1,KRT19,LAMC1,LOXL2,NRP1,PRNP,PTPRM,RAB8A,RHOB,SEC24B,SPAG1,SPTAN1,SPTBN1,TGFBR3,TMEM231,TYRO3,VLDLR
GO.0015031	protein transport	31	0.000394	ENSP00000216442,ENSP00000249269,ENSP00000261942,ENSP00000262544,ENSP00000265175,ENSP00000272233,ENSP00000284320,ENSP00000299705,ENSP00000300935,ENSP00000303585,ENSP00000304565,ENSP00000305647,ENSP00000306106,ENSP00000306788,ENSP00000309415,ENSP00000317332,ENSP00000318016,ENSP00000324628,ENSP00000334100,ENSP00000334153,ENSP00000340698,ENSP00000345689,ENSP00000349016,ENSP00000349259,ENSP00000356540…	ARL6IP1,ATP6V1D,CLIP1,CLTB,EXOC7,FAF2,GBF1,GIPC1,JAGN1,KIAA0196,NAPG,PEX14,PMPCB,RAB31,RAB5C,RAB8A,RFTN1,RHOB,SEC23B,SEC24B,SLC25A6,SNX18,SPTBN1,STX11,STXBP1,TF,TMED3,TOMM70A,TXNIP,VAMP5,VLDLR
GO.0031333	negative regulation of protein complex assembly	9	0.000521	ENSP00000001008,ENSP00000331602,ENSP00000340278,ENSP00000347719,ENSP00000349016,ENSP00000349259,ENSP00000350941,ENSP00000361824,ENSP00000384312	FKBP4,PARK7,PEX14,PRKCD,SPTAN1,SPTBN1,SRC,TBCD,TRIOBP
GO.0009725	response to hormone	25	0.000546	ENSP00000007722,ENSP00000212355,ENSP00000216442,ENSP00000231061,ENSP00000232564,ENSP00000233809,ENSP00000261590,ENSP00000262768,ENSP00000267843,ENSP00000268150,ENSP00000282561,ENSP00000293288,ENSP00000294724,ENSP00000300935,ENSP00000304565,ENSP00000316338,ENSP00000347979,ENSP00000350941,ENSP00000355124,ENSP00000356969,ENSP00000358323,ENSP00000359675,ENSP00000371532,ENSP00000419970,ENSP00000421725	AGL,APOA2,ATP6V1D,BAIAP2,BAX,DSG2,FAS,FGF7,GC,GJA1,GNB4,GNG5,IGFBP2,ITGA3,KRT19,MFGE8,POR,RAB31,RAB8A,SPARC,SRC,TGFBR3,TIMP2,TXNIP,VLDLR
GO.0006457	protein folding	12	0.000569	ENSP00000001008,ENSP00000222308,ENSP00000245046,ENSP00000259253,ENSP00000259818,ENSP00000261735,ENSP00000261772,ENSP00000269881,ENSP00000347719,ENSP00000356969,ENSP00000369127,ENSP00000421922	AARS,APOA2,CALR3,DNAJA1,EMC3,ERP29,FKBP4,FKBP8,LRPAP1,TBCD,TUBB2B,UGGT1
GO.0048699	generation of neurons	32	0.000625	ENSP00000001008,ENSP00000007722,ENSP00000230419,ENSP00000258341,ENSP00000259818,ENSP00000262768,ENSP00000265175,ENSP00000265371,ENSP00000272233,ENSP00000282561,ENSP00000293288,ENSP00000295550,ENSP00000300935,ENSP00000330523,ENSP00000331418,ENSP00000339787,ENSP00000341138,ENSP00000346839,ENSP00000349259,ENSP00000350941,ENSP00000351926,ENSP00000353030,ENSP00000355180,ENSP00000360882,ENSP00000361824…	ACSL4,AP2A1,BAX,COL5A1,COL6A1,COL6A3,CTHRC1,CTNNA2,EPB41L3,FAT4,FKBP4,FN1,GJA1,ITGA3,KCNMA1,LAMC1,NRP1,PRMT1,PRNP,PTK7,PTPRF,PTPRM,RAB8A,RHOB,SDK1,SEC24B,SPTAN1,SPTBN1,SRC,TIMP2,TUBB2B,VLDLR
GO.0000902	cell morphogenesis	26	0.000637	ENSP00000212355,ENSP00000216442,ENSP00000251809,ENSP00000258341,ENSP00000263798,ENSP00000265175,ENSP00000265371,ENSP00000272233,ENSP00000282561,ENSP00000295550,ENSP00000300935,ENSP00000316338,ENSP00000331418,ENSP00000341138,ENSP00000346839,ENSP00000349259,ENSP00000351926,ENSP00000355180,ENSP00000360882,ENSP00000361824,ENSP00000368752,ENSP00000371532,ENSP00000373783,ENSP00000377941,ENSP00000381184…	ACTN1,AP2A1,ATP6V1D,BAIAP2,COL5A1,COL6A1,COL6A3,CTNNA2,EPB41L3,FN1,GJA1,LAMC1,LOXL2,NRP1,PRNP,PTPRM,RAB8A,RHOB,SEC24B,SPAG1,SPTAN1,SPTBN1,TGFBR3,TMEM231,TYRO3,VLDLR
GO.0000904	cell morphogenesis involved in differentiation	21	0.000893	ENSP00000212355,ENSP00000258341,ENSP00000263798,ENSP00000265175,ENSP00000265371,ENSP00000272233,ENSP00000295550,ENSP00000300935,ENSP00000316338,ENSP00000331418,ENSP00000346839,ENSP00000349259,ENSP00000351926,ENSP00000355180,ENSP00000360882,ENSP00000361824,ENSP00000368752,ENSP00000371532,ENSP00000373783,ENSP00000377941,ENSP00000418191	ACTN1,AP2A1,BAIAP2,COL5A1,COL6A1,COL6A3,CTNNA2,FN1,LAMC1,LOXL2,NRP1,PRNP,PTPRM,RAB8A,RHOB,SEC24B,SPTAN1,SPTBN1,TGFBR3,TYRO3,VLDLR
GO.0006820	anion transport	17	0.00127	ENSP00000225665,ENSP00000234256,ENSP00000261622,ENSP00000282561,ENSP00000283558,ENSP00000298223,ENSP00000313740,ENSP00000332756,ENSP00000339787,ENSP00000340698,ENSP00000349887,ENSP00000356969,ENSP00000360569,ENSP00000362399,ENSP00000370808,ENSP00000381634,ENSP00000444408	ACSL4,APOA2,ASNA1,ATP11A,ATP11C,FOLR2,GIPC1,GJA1,SCP2,SLC1A4,SLC1A5,SLC25A11,SLC25A6,SLC38A1,SLC38A5,SLC7A5,STXBP1
GO.0030198	extracellular matrix organization	15	0.00127	ENSP00000007722,ENSP00000052754,ENSP00000231061,ENSP00000258341,ENSP00000262768,ENSP00000295550,ENSP00000309714,ENSP00000324101,ENSP00000346839,ENSP00000355180,ENSP00000360882,ENSP00000373783,ENSP00000377941,ENSP00000386896,ENSP00000398736	ACTN1,CD151,COL5A1,COL6A1,COL6A3,CYR61,DCN,FN1,ITGA3,ITGA6,LAMC1,LOXL2,SH3PXD2B,SPARC,TIMP2
GO.0065008	regulation of biological quality	53	0.00127	ENSP00000007722,ENSP00000205948,ENSP00000212355,ENSP00000216442,ENSP00000231061,ENSP00000254521,ENSP00000260731,ENSP00000261590,ENSP00000261622,ENSP00000261772,ENSP00000263798,ENSP00000265371,ENSP00000267843,ENSP00000272233,ENSP00000282561,ENSP00000283558,ENSP00000293217,ENSP00000295440,ENSP00000295927,ENSP00000319141,ENSP00000324628,ENSP00000331602,ENSP00000332756,ENSP00000334958,ENSP00000335655…	AARS,ACOX1,ACTN1,ADIPOR1,APOA2,APOH,ATP11A,ATP11C,ATP13A4,ATP6V1D,CTNNA2,CYBRD1,DSG2,EPB41L3,FAS,FGF7,FMNL3,G3BP2,GC,GIPC1,GJA1,GNA14,HSD17B11,HSD17B7,IARS,ITGA3,ITGA6,KIF11,NAPG,NCKAP1,NDUFS1,NPPC,NRP1,PRKCD,PRNP,PTX3,RHOB,RLTPR,SCP2,SLC25A6,SLC38A1,SLC7A5,SPARC,SPTAN1,SPTBN1,SRC,STAU1,STX11,TF,TGFBR3,TRIOBP,TXNRD1,TYRO3
GO.0048666	neuron development	23	0.00132	ENSP00000258341,ENSP00000265175,ENSP00000265371,ENSP00000272233,ENSP00000282561,ENSP00000295550,ENSP00000300935,ENSP00000330523,ENSP00000331418,ENSP00000339787,ENSP00000341138,ENSP00000349259,ENSP00000350941,ENSP00000351926,ENSP00000353030,ENSP00000355180,ENSP00000360882,ENSP00000361824,ENSP00000368752,ENSP00000371532,ENSP00000377862,ENSP00000406162,ENSP00000418191	ACSL4,AP2A1,COL5A1,COL6A1,COL6A3,CTHRC1,CTNNA2,EPB41L3,FAT4,GJA1,LAMC1,NRP1,PRMT1,PRNP,PTPRF,PTPRM,RAB8A,RHOB,SEC24B,SPTAN1,SPTBN1,SRC,VLDLR
GO.0042060	wound healing	21	0.00137	ENSP00000007722,ENSP00000052754,ENSP00000205948,ENSP00000230419,ENSP00000231061,ENSP00000260731,ENSP00000261622,ENSP00000263798,ENSP00000267843,ENSP00000272233,ENSP00000306253,ENSP00000331602,ENSP00000346839,ENSP00000350941,ENSP00000360882,ENSP00000365807,ENSP00000377941,ENSP00000385806,ENSP00000385834,ENSP00000386896,ENSP00000398736	ACTN1,APOH,COL5A1,CYR61,DCN,FGF7,FN1,GNA14,ITGA3,ITGA6,ITPR1,KCNMA1,KIF11,PRKCD,PTK7,RHOB,SLC7A5,SPARC,SRC,TF,TYRO3
GO.0043393	regulation of protein binding	10	0.00137	ENSP00000212355,ENSP00000265371,ENSP00000293288,ENSP00000330523,ENSP00000331602,ENSP00000340278,ENSP00000349016,ENSP00000350941,ENSP00000353030,ENSP00000421922	BAX,CTHRC1,LRPAP1,NRP1,PARK7,PEX14,PRKCD,PTPRF,SRC,TGFBR3
GO.0055114	oxidation-reduction process	26	0.00137	ENSP00000216962,ENSP00000221418,ENSP00000229319,ENSP00000232564,ENSP00000254521,ENSP00000280346,ENSP00000293217,ENSP00000293288,ENSP00000294724,ENSP00000306003,ENSP00000306253,ENSP00000312370,ENSP00000319141,ENSP00000322450,ENSP00000341785,ENSP00000345096,ENSP00000346103,ENSP00000351035,ENSP00000356969,ENSP00000359675,ENSP00000360569,ENSP00000362399,ENSP00000370808,ENSP00000373783,ENSP00000377446…	ACOX1,ADIPOR1,AGL,AIFM2,APOA2,ATP5I,BAX,CYBRD1,DLAT,ECH1,GNB4,GNG5,GPX4,HSD17B11,HSD17B7,IMPDH1,ITPR1,LDHB,LOXL2,NDUFS1,NDUFV1,PYGB,SCP2,SLC25A6,STXBP1,SUCLG1
GO.0061024	membrane organization	24	0.00137	ENSP00000261183,ENSP00000265175,ENSP00000268150,ENSP00000282561,ENSP00000283558,ENSP00000300935,ENSP00000303585,ENSP00000304565,ENSP00000306788,ENSP00000309714,ENSP00000316338,ENSP00000324628,ENSP00000332756,ENSP00000334100,ENSP00000334153,ENSP00000341138,ENSP00000349259,ENSP00000349887,ENSP00000350941,ENSP00000356540,ENSP00000359000,ENSP00000360569,ENSP00000360882,ENSP00000377862	ARL6IP1,ASNA1,ATP11A,ATP11C,BAIAP2,CLIP1,COL5A1,EPB41L3,EXOC7,FAT4,GBF1,GJA1,MFGE8,NAPG,OSBPL8,RAB31,RAB8A,RFTN1,SCP2,SEC24B,SH3PXD2B,SPTBN1,SRC,STX11
GO.0044281	small molecule metabolic process	42	0.00148	ENSP00000035307,ENSP00000166534,ENSP00000216780,ENSP00000216962,ENSP00000221418,ENSP00000225665,ENSP00000232219,ENSP00000232564,ENSP00000254521,ENSP00000259253,ENSP00000261386,ENSP00000261622,ENSP00000261772,ENSP00000262027,ENSP00000265175,ENSP00000267843,ENSP00000293217,ENSP00000294724,ENSP00000295440,ENSP00000306003,ENSP00000306253,ENSP00000322450,ENSP00000339787,ENSP00000340278,ENSP00000341785…	AARS,ABCC1,ACOX1,ACSL4,ADIPOR1,AGL,APOA2,ATP5I,CHPF2,CTPS1,ECH1,EEF1E1,FGF7,GC,GDE1,GNB4,GNG5,GPX4,HSD17B7,IARS,IMPDH1,ITPR1,MARS,NDUFS1,NDUFV1,NPPC,P4HA2,PARK7,PCK2,POR,PSAT1,PYGB,RBP1,SCP2,SEC24B,SLC25A11,SLC25A6,SLC7A5,STXBP1,TXNRD1,UGGT1,VLDLR
GO.0010256	endomembrane system organization	16	0.00174	ENSP00000163416,ENSP00000261183,ENSP00000261636,ENSP00000300935,ENSP00000303585,ENSP00000304565,ENSP00000305647,ENSP00000306106,ENSP00000316338,ENSP00000341138,ENSP00000349259,ENSP00000349887,ENSP00000359000,ENSP00000360569,ENSP00000360882,ENSP00000377862	ARL1,ASNA1,BAIAP2,CLIP1,COL5A1,EPB41L3,FAT4,GBF1,GOLGA5,JAGN1,OSBPL8,RAB31,RAB8A,SCP2,SPTBN1,VAMP5
GO.0032990	cell part morphogenesis	22	0.00181	ENSP00000216442,ENSP00000251809,ENSP00000258341,ENSP00000265371,ENSP00000272233,ENSP00000282561,ENSP00000293288,ENSP00000295550,ENSP00000300935,ENSP00000316338,ENSP00000331418,ENSP00000341138,ENSP00000349259,ENSP00000350941,ENSP00000351926,ENSP00000355180,ENSP00000360882,ENSP00000361824,ENSP00000368752,ENSP00000371532,ENSP00000381184,ENSP00000418191	AP2A1,ATP6V1D,BAIAP2,BAX,COL5A1,COL6A1,COL6A3,CTNNA2,EPB41L3,GJA1,LAMC1,NRP1,PRNP,PTPRM,RAB8A,RHOB,SPAG1,SPTAN1,SPTBN1,SRC,TMEM231,VLDLR
GO.0009605	response to external stimulus	38	0.00207	ENSP00000052754,ENSP00000217426,ENSP00000231061,ENSP00000232219,ENSP00000233809,ENSP00000258341,ENSP00000265371,ENSP00000267843,ENSP00000272233,ENSP00000282561,ENSP00000294724,ENSP00000295550,ENSP00000295927,ENSP00000306106,ENSP00000316338,ENSP00000331418,ENSP00000331602,ENSP00000339787,ENSP00000347979,ENSP00000349259,ENSP00000350941,ENSP00000351926,ENSP00000355180,ENSP00000356969,ENSP00000358323…	ACSL4,AGL,AHCY,AP2A1,APOA2,BAIAP2,COL5A1,COL6A1,COL6A3,CTNNA2,CYR61,DCN,FAS,FGF7,GBF1,GC,GJA1,IGFBP2,ITGA6,JAGN1,KCNMA1,LAMC1,NRP1,POR,PRKCD,PRNP,PTPRM,PTX3,RBP1,RHOB,SLC25A6,SPARC,SPTAN1,SPTBN1,SRC,TXNIP,UBQLN1,VLDLR
GO.0048812	neuron projection morphogenesis	18	0.00221	ENSP00000258341,ENSP00000265371,ENSP00000272233,ENSP00000282561,ENSP00000295550,ENSP00000300935,ENSP00000316338,ENSP00000331418,ENSP00000341138,ENSP00000349259,ENSP00000350941,ENSP00000351926,ENSP00000355180,ENSP00000360882,ENSP00000361824,ENSP00000368752,ENSP00000371532,ENSP00000418191	AP2A1,BAIAP2,COL5A1,COL6A1,COL6A3,CTNNA2,EPB41L3,GJA1,LAMC1,NRP1,PRNP,PTPRM,RAB8A,RHOB,SPTAN1,SPTBN1,SRC,VLDLR
GO.0031175	neuron projection development	20	0.00235	ENSP00000258341,ENSP00000265371,ENSP00000272233,ENSP00000282561,ENSP00000295550,ENSP00000300935,ENSP00000331418,ENSP00000339787,ENSP00000341138,ENSP00000349259,ENSP00000350941,ENSP00000351926,ENSP00000353030,ENSP00000355180,ENSP00000360882,ENSP00000361824,ENSP00000368752,ENSP00000371532,ENSP00000406162,ENSP00000418191	ACSL4,AP2A1,COL5A1,COL6A1,COL6A3,CTNNA2,EPB41L3,GJA1,LAMC1,NRP1,PRMT1,PRNP,PTPRF,PTPRM,RAB8A,RHOB,SPTAN1,SPTBN1,SRC,VLDLR
GO.0015804	neutral amino acid transport	5	0.00319	ENSP00000234256,ENSP00000261622,ENSP00000313740,ENSP00000381634,ENSP00000444408	SLC1A4,SLC1A5,SLC38A1,SLC38A5,SLC7A5
GO.0022008	neurogenesis	31	0.00319	ENSP00000001008,ENSP00000007722,ENSP00000230419,ENSP00000258341,ENSP00000259818,ENSP00000262768,ENSP00000265175,ENSP00000265371,ENSP00000272233,ENSP00000282561,ENSP00000293288,ENSP00000295550,ENSP00000300935,ENSP00000330523,ENSP00000331418,ENSP00000339787,ENSP00000341138,ENSP00000346839,ENSP00000349259,ENSP00000350941,ENSP00000351926,ENSP00000353030,ENSP00000355180,ENSP00000360882,ENSP00000361824…	ACSL4,AP2A1,BAX,COL5A1,COL6A1,COL6A3,CTHRC1,CTNNA2,EPB41L3,FKBP4,FN1,GJA1,ITGA3,KCNMA1,LAMC1,NRP1,PRMT1,PRNP,PTK7,PTPRF,PTPRM,RAB8A,RHOB,SDK1,SEC24B,SPTAN1,SPTBN1,SRC,TIMP2,TUBB2B,VLDLR
GO.0048858	cell projection morphogenesis	21	0.00353	ENSP00000216442,ENSP00000251809,ENSP00000258341,ENSP00000265371,ENSP00000272233,ENSP00000282561,ENSP00000295550,ENSP00000300935,ENSP00000316338,ENSP00000331418,ENSP00000341138,ENSP00000349259,ENSP00000350941,ENSP00000351926,ENSP00000355180,ENSP00000360882,ENSP00000361824,ENSP00000368752,ENSP00000371532,ENSP00000381184,ENSP00000418191	AP2A1,ATP6V1D,BAIAP2,COL5A1,COL6A1,COL6A3,CTNNA2,EPB41L3,GJA1,LAMC1,NRP1,PRNP,PTPRM,RAB8A,RHOB,SPAG1,SPTAN1,SPTBN1,SRC,TMEM231,VLDLR
GO.0009653	anatomical structure morphogenesis	40	0.00374	ENSP00000007722,ENSP00000052754,ENSP00000212355,ENSP00000216442,ENSP00000235521,ENSP00000251809,ENSP00000258341,ENSP00000263798,ENSP00000265175,ENSP00000265371,ENSP00000267843,ENSP00000268150,ENSP00000272233,ENSP00000282561,ENSP00000293288,ENSP00000295440,ENSP00000295550,ENSP00000300935,ENSP00000316338,ENSP00000330523,ENSP00000331418,ENSP00000341138,ENSP00000346839,ENSP00000349259,ENSP00000351926…	ACTN1,AP2A1,ATP6V1D,BAIAP2,BAX,COL6A1,COL6A3,CTHRC1,CTNNA2,CYR61,DCN,EPB41L3,FAT4,FGF7,FN1,GJA1,HMGN1,ITGA3,ITGA6,KRT19,LAMC1,LOXL2,MFGE8,NCKAP1,NPPC,NRP1,PRNP,PTPRM,RAB8A,RHOB,SEC24B,SPAG1,SPTAN1,SPTBN1,TGFBR3,TMEM231,TXNRD1,TYRO3,VLDLR,WARS2
GO.0006865	amino acid transport	8	0.0041	ENSP00000234256,ENSP00000261622,ENSP00000298223,ENSP00000313740,ENSP00000340698,ENSP00000362399,ENSP00000381634,ENSP00000444408	FOLR2,GIPC1,SLC1A4,SLC1A5,SLC38A1,SLC38A5,SLC7A5,STXBP1
GO.0009611	response to wounding	21	0.0044	ENSP00000007722,ENSP00000052754,ENSP00000205948,ENSP00000230419,ENSP00000231061,ENSP00000260731,ENSP00000261622,ENSP00000263798,ENSP00000272233,ENSP00000293288,ENSP00000306253,ENSP00000331602,ENSP00000346839,ENSP00000350941,ENSP00000360882,ENSP00000365807,ENSP00000377941,ENSP00000385806,ENSP00000385834,ENSP00000386896,ENSP00000398736	ACTN1,APOH,BAX,COL5A1,CYR61,DCN,FN1,GNA14,ITGA3,ITGA6,ITPR1,KCNMA1,KIF11,PRKCD,PTK7,RHOB,SLC7A5,SPARC,SRC,TF,TYRO3
GO.0044087	regulation of cellular component biogenesis	19	0.00492	ENSP00000001008,ENSP00000265175,ENSP00000282561,ENSP00000293288,ENSP00000303585,ENSP00000316338,ENSP00000331602,ENSP00000340278,ENSP00000347719,ENSP00000347979,ENSP00000349016,ENSP00000349259,ENSP00000350941,ENSP00000354251,ENSP00000361824,ENSP00000362399,ENSP00000365576,ENSP00000384312,ENSP00000398736	BAIAP2,BAX,CLIP1,CYR61,FAS,FKBP4,GJA1,NCKAP1,PARK7,PEX14,PRKCD,SEC24B,SPTAN1,SPTBN1,SRC,STXBP1,TBCD,TRIOBP,UBQLN1
GO.0048667	cell morphogenesis involved in neuron differentiation	17	0.00503	ENSP00000258341,ENSP00000265175,ENSP00000265371,ENSP00000272233,ENSP00000295550,ENSP00000300935,ENSP00000316338,ENSP00000331418,ENSP00000349259,ENSP00000350941,ENSP00000351926,ENSP00000355180,ENSP00000360882,ENSP00000361824,ENSP00000368752,ENSP00000371532,ENSP00000418191	AP2A1,BAIAP2,COL5A1,COL6A1,COL6A3,CTNNA2,LAMC1,NRP1,PRNP,PTPRM,RAB8A,RHOB,SEC24B,SPTAN1,SPTBN1,SRC,VLDLR
GO.0060191	regulation of lipase activity	8	0.00503	ENSP00000205948,ENSP00000261636,ENSP00000283243,ENSP00000306253,ENSP00000331602,ENSP00000356969,ENSP00000398736,ENSP00000419970	APOA2,APOH,ARL1,CYR61,ITPR1,PLA2R1,POR,PRKCD
GO.0006927	transformed cell apoptotic process	3	0.00525	ENSP00000272233,ENSP00000293288,ENSP00000347979	BAX,FAS,RHOB
GO.0022617	extracellular matrix disassembly	8	0.00541	ENSP00000052754,ENSP00000258341,ENSP00000262768,ENSP00000295550,ENSP00000309714,ENSP00000346839,ENSP00000355180,ENSP00000360882	COL5A1,COL6A1,COL6A3,DCN,FN1,LAMC1,SH3PXD2B,TIMP2
GO.1902580	single-organism cellular localization	22	0.00541	ENSP00000249269,ENSP00000256366,ENSP00000261183,ENSP00000265175,ENSP00000284320,ENSP00000293288,ENSP00000300935,ENSP00000303585,ENSP00000304565,ENSP00000305647,ENSP00000306788,ENSP00000309714,ENSP00000334153,ENSP00000341138,ENSP00000349016,ENSP00000349259,ENSP00000349887,ENSP00000356540,ENSP00000358323,ENSP00000359000,ENSP00000360569,ENSP00000370808	ARL6IP1,ASNA1,BAX,CLIP1,EPB41L3,GBF1,OSBPL8,PEX14,PMPCB,RAB31,RAB8A,RFTN1,SCP2,SEC24B,SH3PXD2B,SLC25A6,SPTBN1,STX11,SYNJ2BP,TOMM70A,TXNIP,VAMP5
GO.0048731	system development	57	0.00555	ENSP00000205948,ENSP00000212355,ENSP00000222308,ENSP00000230419,ENSP00000231061,ENSP00000232564,ENSP00000235521,ENSP00000258341,ENSP00000258761,ENSP00000259818,ENSP00000261590,ENSP00000261622,ENSP00000261772,ENSP00000262768,ENSP00000265175,ENSP00000265371,ENSP00000268150,ENSP00000272233,ENSP00000280527,ENSP00000293288,ENSP00000295440,ENSP00000295550,ENSP00000300935,ENSP00000306106,ENSP00000309714…	AARS,ACSL4,ACTN1,AP2A1,APOA2,APOH,ATP11C,BAX,BZW2,COL6A1,COL6A3,CRIM1,CTHRC1,CTNNA2,CYR61,DSG2,EIF2S2,EPB41L3,EPN1,FAS,FKBP8,FN1,GC,GNB4,HMGN1,IMPDH1,ITGA6,JAGN1,KCNMA1,KRT19,LAMC1,LOXL2,MFGE8,NPPC,NRP1,PRMT1,PRNP,PTK7,PTPRF,PTPRM,RAB8A,RHOB,RLTPR,SDK1,SEC24B,SH3PXD2B,SLC7A5,SPARC,SPTAN1,SPTBN1,TF,TGFBR3,TIMP2,TUBB2B,TXNIP,VLDLR,WARS2
GO.0030182	neuron differentiation	24	0.00569	ENSP00000258341,ENSP00000265175,ENSP00000265371,ENSP00000272233,ENSP00000282561,ENSP00000295550,ENSP00000300935,ENSP00000330523,ENSP00000331418,ENSP00000339787,ENSP00000341138,ENSP00000349259,ENSP00000350941,ENSP00000351926,ENSP00000353030,ENSP00000355180,ENSP00000360882,ENSP00000361824,ENSP00000368752,ENSP00000371532,ENSP00000377862,ENSP00000385806,ENSP00000406162,ENSP00000418191	ACSL4,AP2A1,COL5A1,COL6A1,COL6A3,CTHRC1,CTNNA2,EPB41L3,FAT4,GJA1,KCNMA1,LAMC1,NRP1,PRMT1,PRNP,PTPRF,PTPRM,RAB8A,RHOB,SEC24B,SPTAN1,SPTBN1,SRC,VLDLR
GO.0032272	negative regulation of protein polymerization	6	0.00569	ENSP00000001008,ENSP00000331602,ENSP00000347719,ENSP00000349259,ENSP00000361824,ENSP00000384312	FKBP4,PRKCD,SPTAN1,SPTBN1,TBCD,TRIOBP
GO.0051128	regulation of cellular component organization	40	0.00569	ENSP00000230419,ENSP00000231061,ENSP00000233809,ENSP00000234256,ENSP00000256366,ENSP00000260731,ENSP00000265175,ENSP00000265371,ENSP00000268150,ENSP00000280527,ENSP00000282561,ENSP00000293288,ENSP00000295927,ENSP00000303585,ENSP00000331602,ENSP00000335655,ENSP00000339787,ENSP00000340278,ENSP00000341138,ENSP00000341785,ENSP00000345689,ENSP00000346839,ENSP00000347719,ENSP00000347979,ENSP00000349016…	ACSL4,ADIPOR1,APOA2,BAX,CLIP1,COL5A1,CRIM1,CTNNA2,CYR61,EPB41L3,FAS,FMNL3,FN1,GJA1,IGFBP2,KIF11,MFGE8,NCKAP1,NRP1,PARK7,PEX14,PRKCD,PTK7,PTPRF,PTX3,RAB5C,SDK1,SEC24B,SLC1A4,SPARC,SPTAN1,SPTBN1,SRC,STXBP1,SYNJ2BP,TBCD,TRIOBP,TXLNA,UBQLN1,VLDLR
GO.1901700	response to oxygen-containing compound	29	0.00588	ENSP00000052754,ENSP00000212355,ENSP00000216442,ENSP00000230419,ENSP00000231061,ENSP00000232564,ENSP00000233809,ENSP00000261590,ENSP00000261772,ENSP00000267843,ENSP00000272233,ENSP00000282561,ENSP00000293288,ENSP00000295440,ENSP00000300935,ENSP00000304565,ENSP00000316338,ENSP00000340278,ENSP00000350941,ENSP00000355180,ENSP00000356969,ENSP00000358323,ENSP00000359675,ENSP00000371532,ENSP00000385806…	AARS,APOA2,ATP6V1D,BAIAP2,BAX,COL6A1,DCN,DSG2,FGF7,GC,GJA1,GNB4,GNG5,IGFBP2,KCNMA1,NPPC,PARK7,POR,PTK7,RAB31,RAB8A,RHOB,SDK1,SPARC,SRC,TGFBR3,TXNIP,TXNRD1,VLDLR
GO.0006835	dicarboxylic acid transport	6	0.00594	ENSP00000225665,ENSP00000234256,ENSP00000298223,ENSP00000340698,ENSP00000362399,ENSP00000444408	FOLR2,GIPC1,SLC1A4,SLC1A5,SLC25A11,STXBP1
GO.0015980	energy derivation by oxidation of organic compounds	13	0.00605	ENSP00000216962,ENSP00000232564,ENSP00000280346,ENSP00000293288,ENSP00000294724,ENSP00000306003,ENSP00000306253,ENSP00000322450,ENSP00000359675,ENSP00000362399,ENSP00000370808,ENSP00000377446,ENSP00000392709	AGL,ATP5I,BAX,DLAT,GNB4,GNG5,ITPR1,NDUFS1,NDUFV1,PYGB,SLC25A6,STXBP1,SUCLG1
GO.0007009	plasma membrane organization	10	0.0061	ENSP00000300935,ENSP00000303585,ENSP00000304565,ENSP00000305647,ENSP00000316338,ENSP00000341138,ENSP00000349259,ENSP00000360569,ENSP00000360882,ENSP00000377862	BAIAP2,CLIP1,COL5A1,EPB41L3,FAT4,RAB31,RAB8A,SCP2,SPTBN1,VAMP5
GO.0009719	response to endogenous stimulus	30	0.00611	ENSP00000007722,ENSP00000212355,ENSP00000216442,ENSP00000231061,ENSP00000232564,ENSP00000233809,ENSP00000261590,ENSP00000261772,ENSP00000262768,ENSP00000267843,ENSP00000268150,ENSP00000282561,ENSP00000293288,ENSP00000294724,ENSP00000300935,ENSP00000304565,ENSP00000306253,ENSP00000316338,ENSP00000331602,ENSP00000347979,ENSP00000350941,ENSP00000355124,ENSP00000355180,ENSP00000356969,ENSP00000358323…	AARS,AGL,APOA2,ATP6V1D,BAIAP2,BAX,COL6A1,DSG2,FAS,FGF7,GC,GJA1,GNB4,GNG5,IGFBP2,ITGA3,ITPR1,KRT19,MFGE8,POR,PRKCD,RAB31,RAB8A,SDK1,SPARC,SRC,TGFBR3,TIMP2,TXNIP,VLDLR
GO.0048646	anatomical structure formation involved in morphogenesis	24	0.00654	ENSP00000007722,ENSP00000212355,ENSP00000216442,ENSP00000230419,ENSP00000251809,ENSP00000265175,ENSP00000265371,ENSP00000268150,ENSP00000272233,ENSP00000293288,ENSP00000300935,ENSP00000330523,ENSP00000331418,ENSP00000341138,ENSP00000346839,ENSP00000354251,ENSP00000355124,ENSP00000355180,ENSP00000373783,ENSP00000377941,ENSP00000381184,ENSP00000386896,ENSP00000398736,ENSP00000434516	ACTN1,ATP6V1D,BAX,COL6A1,CTHRC1,CYR61,EPB41L3,FN1,ITGA3,ITGA6,KRT19,LOXL2,MFGE8,NCKAP1,NRP1,PTK7,PTPRM,RAB8A,RHOB,SEC24B,SPAG1,TGFBR3,TMEM231,TXNRD1
GO.1902582	single-organism intracellular transport	26	0.00752	ENSP00000249269,ENSP00000261942,ENSP00000262544,ENSP00000265175,ENSP00000272233,ENSP00000284320,ENSP00000293288,ENSP00000300935,ENSP00000303585,ENSP00000304565,ENSP00000305647,ENSP00000306003,ENSP00000306253,ENSP00000306788,ENSP00000317332,ENSP00000324628,ENSP00000334153,ENSP00000340698,ENSP00000345689,ENSP00000349016,ENSP00000349259,ENSP00000351926,ENSP00000358323,ENSP00000359000,ENSP00000370808…	AP2A1,ARL6IP1,ATP5I,BAX,CLIP1,FAF2,GBF1,GIPC1,ITPR1,NAPG,PEX14,PMPCB,RAB31,RAB5C,RAB8A,RFTN1,RHOB,SEC23B,SEC24B,SLC25A6,SNX18,SPTBN1,TBC1D10B,TOMM70A,TXNIP,VAMP5
GO.0006996	organelle organization	48	0.00885	ENSP00000163416,ENSP00000216297,ENSP00000216442,ENSP00000230419,ENSP00000249269,ENSP00000251809,ENSP00000256366,ENSP00000261183,ENSP00000261636,ENSP00000261942,ENSP00000263895,ENSP00000265175,ENSP00000267843,ENSP00000284320,ENSP00000293217,ENSP00000293288,ENSP00000300935,ENSP00000303585,ENSP00000304565,ENSP00000305647,ENSP00000306106,ENSP00000309714,ENSP00000312370,ENSP00000316338,ENSP00000317332…	ACOX1,AIFM2,ARL1,ASNA1,ATP6V1D,BAIAP2,BAX,CLIP1,EPB41L3,EXOC7,FAF2,FGF7,GBF1,GOLGA5,GPX4,H1FX,HMGN1,JAGN1,KIAA0196,KRT19,LOXL2,NCKAP1,NDUFS1,OSBPL8,PARK7,PEX14,PMPCB,PRMT1,PTK7,RAB31,RAB8A,RND3,SCP2,SEC24B,SH3PXD2B,SLC25A6,SNX18,SPAG1,SRC,STX11,SUPT16H,SYNJ2BP,TBCD,TF,TMEM231,TOMM70A,TRIOBP,VAMP5
GO.0006091	generation of precursor metabolites and energy	14	0.00973	ENSP00000216962,ENSP00000232564,ENSP00000280346,ENSP00000293217,ENSP00000293288,ENSP00000294724,ENSP00000306003,ENSP00000306253,ENSP00000322450,ENSP00000359675,ENSP00000362399,ENSP00000370808,ENSP00000377446,ENSP00000392709	ACOX1,AGL,ATP5I,BAX,DLAT,GNB4,GNG5,ITPR1,NDUFS1,NDUFV1,PYGB,SLC25A6,STXBP1,SUCLG1
GO.0044802	single-organism membrane organization	19	0.00973	ENSP00000261183,ENSP00000265175,ENSP00000283558,ENSP00000300935,ENSP00000303585,ENSP00000304565,ENSP00000306788,ENSP00000309714,ENSP00000316338,ENSP00000332756,ENSP00000334153,ENSP00000341138,ENSP00000349259,ENSP00000349887,ENSP00000356540,ENSP00000359000,ENSP00000360569,ENSP00000360882,ENSP00000377862	ARL6IP1,ASNA1,ATP11A,ATP11C,BAIAP2,CLIP1,COL5A1,EPB41L3,FAT4,GBF1,OSBPL8,RAB31,RAB8A,RFTN1,SCP2,SEC24B,SH3PXD2B,SPTBN1,STX11
GO.0010033	response to organic substance	43	0.01	ENSP00000007722,ENSP00000052754,ENSP00000185150,ENSP00000212355,ENSP00000216442,ENSP00000230419,ENSP00000231061,ENSP00000232564,ENSP00000233809,ENSP00000261590,ENSP00000261772,ENSP00000261942,ENSP00000265371,ENSP00000267843,ENSP00000268150,ENSP00000282561,ENSP00000294724,ENSP00000295440,ENSP00000300935,ENSP00000304565,ENSP00000306106,ENSP00000306253,ENSP00000316338,ENSP00000331602,ENSP00000334153…	AARS,ACSL4,AGL,AP2A1,APOA2,ASNA1,ATP6V1D,BAIAP2,COL6A1,DCN,DNAJA1,DSG2,ERLEC1,FAF2,FAS,FGF7,GC,GJA1,GNB4,GNG5,IGFBP2,ITGA3,ITPR1,JAGN1,KCNMA1,KRT19,MFGE8,NPPC,NRP1,PARK7,POR,PRKCD,PTK7,RAB31,RAB8A,RFTN1,SDK1,SPARC,SRC,TGFBR3,TXNIP,UBQLN1,VLDLR
GO.0007399	nervous system development	37	0.0103	ENSP00000001008,ENSP00000007722,ENSP00000222308,ENSP00000230419,ENSP00000232564,ENSP00000258341,ENSP00000258761,ENSP00000259818,ENSP00000261622,ENSP00000261772,ENSP00000262768,ENSP00000263798,ENSP00000265175,ENSP00000265371,ENSP00000272233,ENSP00000280527,ENSP00000282561,ENSP00000293288,ENSP00000295550,ENSP00000300935,ENSP00000330523,ENSP00000331418,ENSP00000339787,ENSP00000341138,ENSP00000346839…	AARS,ACSL4,AP2A1,BAX,BZW2,COL5A1,COL6A1,COL6A3,CRIM1,CTHRC1,CTNNA2,EPB41L3,FKBP4,FKBP8,FN1,GJA1,GNB4,ITGA3,KCNMA1,LAMC1,NRP1,PRMT1,PRNP,PTK7,PTPRF,PTPRM,RAB8A,RHOB,SDK1,SEC24B,SLC7A5,SPTAN1,SPTBN1,TIMP2,TUBB2B,TYRO3,VLDLR
GO.0007044	cell-substrate junction assembly	5	0.0105	ENSP00000258341,ENSP00000324101,ENSP00000346839,ENSP00000377941,ENSP00000386896	ACTN1,CD151,FN1,ITGA6,LAMC1
GO.0048468	cell development	32	0.0111	ENSP00000212355,ENSP00000258341,ENSP00000263798,ENSP00000265175,ENSP00000265371,ENSP00000272233,ENSP00000282561,ENSP00000293288,ENSP00000295550,ENSP00000300935,ENSP00000318016,ENSP00000330523,ENSP00000331418,ENSP00000339787,ENSP00000341138,ENSP00000346839,ENSP00000349259,ENSP00000351926,ENSP00000353030,ENSP00000355124,ENSP00000355180,ENSP00000360882,ENSP00000361824,ENSP00000368752,ENSP00000371532…	ACSL4,ACTN1,AP2A1,BAX,COL5A1,COL6A1,COL6A3,CTHRC1,CTNNA2,CYR61,EPB41L3,FAT4,FN1,GJA1,KCNMA1,KIAA0196,KRT19,LAMC1,LOXL2,NRP1,PRMT1,PRNP,PTPRF,PTPRM,RAB8A,RHOB,SEC24B,SPTAN1,SPTBN1,TGFBR3,TYRO3,VLDLR
GO.0032091	negative regulation of protein binding	6	0.0125	ENSP00000293288,ENSP00000331602,ENSP00000340278,ENSP00000349016,ENSP00000353030,ENSP00000421922	BAX,LRPAP1,PARK7,PEX14,PRKCD,PTPRF
GO.0032271	regulation of protein polymerization	8	0.0125	ENSP00000001008,ENSP00000303585,ENSP00000316338,ENSP00000331602,ENSP00000347719,ENSP00000349259,ENSP00000361824,ENSP00000384312	BAIAP2,CLIP1,FKBP4,PRKCD,SPTAN1,SPTBN1,TBCD,TRIOBP
GO.0046942	carboxylic acid transport	10	0.0141	ENSP00000225665,ENSP00000234256,ENSP00000261622,ENSP00000298223,ENSP00000313740,ENSP00000339787,ENSP00000340698,ENSP00000362399,ENSP00000381634,ENSP00000444408	ACSL4,FOLR2,GIPC1,SLC1A4,SLC1A5,SLC25A11,SLC38A1,SLC38A5,SLC7A5,STXBP1
GO.0007596	blood coagulation	16	0.0143	ENSP00000007722,ENSP00000205948,ENSP00000231061,ENSP00000260731,ENSP00000261622,ENSP00000263798,ENSP00000272233,ENSP00000306253,ENSP00000331602,ENSP00000346839,ENSP00000350941,ENSP00000365807,ENSP00000377941,ENSP00000385806,ENSP00000385834,ENSP00000386896	ACTN1,APOH,FN1,GNA14,ITGA3,ITGA6,ITPR1,KCNMA1,KIF11,PRKCD,RHOB,SLC7A5,SPARC,SRC,TF,TYRO3
GO.0044767	single-organism developmental process	67	0.0143	ENSP00000205948,ENSP00000212355,ENSP00000216442,ENSP00000222308,ENSP00000230419,ENSP00000231061,ENSP00000232564,ENSP00000233809,ENSP00000235521,ENSP00000251646,ENSP00000251809,ENSP00000258341,ENSP00000258761,ENSP00000259818,ENSP00000261183,ENSP00000261590,ENSP00000261622,ENSP00000261772,ENSP00000262768,ENSP00000265175,ENSP00000265371,ENSP00000268150,ENSP00000269881,ENSP00000272233,ENSP00000280527…	AARS,ACSL4,ACTN1,AP2A1,APOA2,APOH,ATP11C,ATP6V1D,BAX,BZW2,CALR3,COL6A1,COL6A3,CRIM1,CTHRC1,CTNNA2,CYR61,DSG2,EIF2S2,EPB41L3,EPN1,FAS,FKBP8,GC,GNB4,GPX4,HMGN1,IARS,IGFBP2,IMPDH1,ITPR1,JAGN1,KCNMA1,KIAA0196,KRT33B,LAMC1,LOXL2,MFGE8,NRP1,OSBPL8,PLA2R1,PRKCD,PRMT1,PRNP,PTK7,PTPRF,PTPRM,RAB8A,RHOB,RLTPR,SDK1,SEC24B,SH3PXD2B,SLC7A5,SPAG1,SPARC,SPTAN1,SPTBN1,TF,TGFBR3,TIMP2,TMEM231,TUBB2B,TXNIP,TXNRD1,V…
GO.0072657	protein localization to membrane	13	0.0143	ENSP00000261183,ENSP00000293288,ENSP00000300935,ENSP00000303585,ENSP00000304565,ENSP00000305647,ENSP00000306788,ENSP00000309714,ENSP00000334153,ENSP00000341138,ENSP00000349259,ENSP00000349887,ENSP00000360569	ARL6IP1,ASNA1,BAX,CLIP1,EPB41L3,OSBPL8,RAB31,RAB8A,RFTN1,SCP2,SH3PXD2B,SPTBN1,VAMP5
GO.0042221	response to chemical	57	0.0147	ENSP00000007722,ENSP00000052754,ENSP00000185150,ENSP00000212355,ENSP00000216442,ENSP00000230419,ENSP00000231061,ENSP00000232564,ENSP00000233809,ENSP00000258341,ENSP00000261590,ENSP00000261772,ENSP00000261942,ENSP00000262940,ENSP00000265371,ENSP00000267843,ENSP00000268150,ENSP00000272233,ENSP00000282561,ENSP00000283243,ENSP00000294724,ENSP00000295440,ENSP00000295550,ENSP00000300935,ENSP00000304565…	AARS,ABCC1,ACSL4,AGL,AP2A1,APOA2,ASNA1,ATP6V1D,BAIAP2,COL5A1,COL6A3,CTPS1,CYBRD1,CYR61,DCN,DNAJA1,DSG2,ERLEC1,FAF2,FGF7,GBF1,GC,GJA1,GNB4,GNG5,IGFBP2,ITGA3,ITPR1,JAGN1,KCNMA1,KRT19,LAMC1,LOXL2,MFGE8,NPPC,NRP1,PARK7,PLA2R1,POR,PRKCD,PTK7,PTPRM,RAB31,RAB8A,RASA4,RFTN1,RHOB,SDK1,SPARC,SPTAN1,SPTBN1,SRC,TGFBR3,TXNIP,TXNRD1,UBQLN1,VLDLR
GO.0006811	ion transport	25	0.016	ENSP00000001008,ENSP00000216442,ENSP00000225665,ENSP00000234256,ENSP00000261622,ENSP00000282561,ENSP00000283558,ENSP00000293288,ENSP00000298223,ENSP00000306253,ENSP00000313740,ENSP00000332756,ENSP00000339787,ENSP00000340278,ENSP00000340698,ENSP00000349887,ENSP00000352655,ENSP00000356969,ENSP00000360569,ENSP00000362399,ENSP00000366032,ENSP00000370808,ENSP00000381634,ENSP00000385806,ENSP00000444408	ACSL4,APOA2,ASNA1,ATP11A,ATP11C,ATP6V1D,BAX,COMMD3,FKBP4,FOLR2,GIPC1,GJA1,ITPR1,KCNMA1,PARK7,SCP2,SLC1A4,SLC1A5,SLC25A11,SLC25A6,SLC38A1,SLC38A5,SLC39A10,SLC7A5,STXBP1
GO.0007409	axonogenesis	15	0.016	ENSP00000258341,ENSP00000265371,ENSP00000272233,ENSP00000295550,ENSP00000300935,ENSP00000316338,ENSP00000331418,ENSP00000349259,ENSP00000350941,ENSP00000351926,ENSP00000355180,ENSP00000360882,ENSP00000361824,ENSP00000368752,ENSP00000418191	AP2A1,BAIAP2,COL5A1,COL6A1,COL6A3,CTNNA2,LAMC1,NRP1,PRNP,PTPRM,RAB8A,RHOB,SPTAN1,SPTBN1,SRC
GO.2000304	positive regulation of ceramide biosynthetic process	2	0.0163	ENSP00000331602,ENSP00000398736	CYR61,PRKCD
GO.0034330	cell junction organization	9	0.0177	ENSP00000258341,ENSP00000261590,ENSP00000282561,ENSP00000324101,ENSP00000341138,ENSP00000346839,ENSP00000347719,ENSP00000377941,ENSP00000386896	ACTN1,CD151,DSG2,EPB41L3,FN1,GJA1,ITGA6,LAMC1,TBCD
GO.0051649	establishment of localization in cell	33	0.0187	ENSP00000231061,ENSP00000249269,ENSP00000261942,ENSP00000262544,ENSP00000263798,ENSP00000267843,ENSP00000284320,ENSP00000293288,ENSP00000300935,ENSP00000303585,ENSP00000304565,ENSP00000306003,ENSP00000306106,ENSP00000306253,ENSP00000306788,ENSP00000309415,ENSP00000324628,ENSP00000334100,ENSP00000334153,ENSP00000340698,ENSP00000345689,ENSP00000346839,ENSP00000349016,ENSP00000349259,ENSP00000351926…	ACTN1,AP2A1,ARL6IP1,ATP5I,BAX,CDC42BPA,CLIP1,CLTB,EXOC7,FAF2,FGF7,FN1,GBF1,GIPC1,ITPR1,JAGN1,NAPG,PEX14,PMPCB,RAB31,RAB5C,RAB8A,RFTN1,SEC23B,SLC25A6,SPARC,SPTBN1,TBC1D10B,TF,TOMM70A,TXLNA,TXNIP,TYRO3
GO.0048869	cellular developmental process	51	0.0197	ENSP00000001008,ENSP00000212355,ENSP00000216442,ENSP00000222308,ENSP00000230419,ENSP00000235521,ENSP00000251809,ENSP00000258341,ENSP00000258761,ENSP00000259818,ENSP00000261183,ENSP00000261622,ENSP00000262768,ENSP00000265175,ENSP00000265371,ENSP00000269881,ENSP00000272233,ENSP00000282561,ENSP00000293288,ENSP00000295440,ENSP00000295550,ENSP00000300935,ENSP00000305647,ENSP00000306106,ENSP00000309714…	ACSL4,ACTN1,AP2A1,ATP11C,ATP6V1D,BAX,BZW2,CALR3,COL5A1,COL6A1,COL6A3,CTHRC1,CTNNA2,CYR61,EPB41L3,FAS,FKBP4,FKBP8,GJA1,IARS,JAGN1,KCNMA1,KIAA0196,LAMC1,LOXL2,NPPC,NRP1,OSBPL8,PRMT1,PRNP,PTK7,PTPRF,PTPRM,RAB8A,RHOB,SDK1,SEC24B,SH3PXD2B,SLC7A5,SPAG1,SPTAN1,SPTBN1,TF,TGFBR3,TIMP2,TMEM231,TUBB2B,TXNIP,VAMP5,VLDLR,WARS2
GO.0048193	Golgi vesicle transport	10	0.0199	ENSP00000261636,ENSP00000262544,ENSP00000265175,ENSP00000300935,ENSP00000304565,ENSP00000305647,ENSP00000324628,ENSP00000349259,ENSP00000351926,ENSP00000359000	AP2A1,ARL1,GBF1,NAPG,RAB31,RAB8A,SEC23B,SEC24B,SPTBN1,VAMP5
GO.0030168	platelet activation	10	0.0204	ENSP00000231061,ENSP00000263798,ENSP00000272233,ENSP00000306253,ENSP00000331602,ENSP00000346839,ENSP00000350941,ENSP00000365807,ENSP00000377941,ENSP00000385834	ACTN1,FN1,GNA14,ITPR1,PRKCD,RHOB,SPARC,SRC,TF,TYRO3
GO.0001775	cell activation	17	0.0208	ENSP00000231061,ENSP00000272233,ENSP00000293288,ENSP00000306253,ENSP00000324101,ENSP00000332756,ENSP00000345096,ENSP00000346839,ENSP00000347979,ENSP00000350941,ENSP00000356540,ENSP00000359000,ENSP00000361699,ENSP00000362711,ENSP00000365807,ENSP00000377941,ENSP00000385834	ACTN1,ATP11C,BAX,CD151,CTPS1,FAS,FN1,GBF1,GNA14,IMPDH1,ITPR1,RHOB,SPARC,SRC,STX11,TF,TXLNA
GO.0048585	negative regulation of response to stimulus	27	0.0208	ENSP00000007722,ENSP00000185150,ENSP00000205948,ENSP00000212355,ENSP00000256366,ENSP00000262768,ENSP00000262940,ENSP00000263798,ENSP00000265371,ENSP00000282561,ENSP00000293288,ENSP00000306253,ENSP00000330523,ENSP00000331602,ENSP00000340278,ENSP00000350941,ENSP00000351926,ENSP00000352738,ENSP00000356969,ENSP00000362111,ENSP00000365576,ENSP00000368752,ENSP00000369127,ENSP00000386896,ENSP00000406209…	AP2A1,APOA2,APOH,BAX,CTHRC1,CTNNA2,DNAJA1,EPN1,ERLEC1,G3BP2,GJA1,ITGA3,ITGA6,ITPR1,LRPAP1,NRP1,PARK7,PRKCD,PRNP,RASA4,SRC,SYNJ2BP,TGFBR3,TIMP2,TSPAN6,TYRO3,UBQLN1
GO.0061564	axon development	15	0.0217	ENSP00000258341,ENSP00000265371,ENSP00000272233,ENSP00000295550,ENSP00000300935,ENSP00000316338,ENSP00000331418,ENSP00000349259,ENSP00000350941,ENSP00000351926,ENSP00000355180,ENSP00000360882,ENSP00000361824,ENSP00000368752,ENSP00000418191	AP2A1,BAIAP2,COL5A1,COL6A1,COL6A3,CTNNA2,LAMC1,NRP1,PRNP,PTPRM,RAB8A,RHOB,SPTAN1,SPTBN1,SRC
GO.0046688	response to copper ion	4	0.0229	ENSP00000293288,ENSP00000340278,ENSP00000368752,ENSP00000373783	BAX,LOXL2,PARK7,PRNP
GO.0044710	single-organism metabolic process	61	0.023	ENSP00000035307,ENSP00000185150,ENSP00000205948,ENSP00000216297,ENSP00000216780,ENSP00000216962,ENSP00000217446,ENSP00000219473,ENSP00000221418,ENSP00000225665,ENSP00000232219,ENSP00000232564,ENSP00000254521,ENSP00000259253,ENSP00000261622,ENSP00000261636,ENSP00000261772,ENSP00000261942,ENSP00000262027,ENSP00000263645,ENSP00000263798,ENSP00000265175,ENSP00000267843,ENSP00000293217,ENSP00000293288…	AARS,ABCC1,ACOX1,ACSL4,ADIPOR1,AGL,AIFM2,APOA2,APOH,ARL1,ATP5I,BAX,CD81,CHPF2,COL5A1,COL6A1,COL6A3,CTPS1,CYBRD1,ECH1,EEF1E1,ERLEC1,FAF2,FGF7,GC,GNB4,GNG5,GPX4,HMGN1,HSD17B11,HSD17B7,IARS,IMPDH1,ITPR1,LOXL2,MARS,NDUFS1,NDUFV1,NPPC,PCK2,PIGS,PIGU,PRMT1,PSAT1,PYGB,RAB31,RBP1,SCP2,SEC24B,SLC25A11,SLC25A6,SLC7A5,STXBP1,SUPT16H,TF,TRIOBP,TYRO3,UBQLN1,UGGT1,USP10,VLDLR
GO.0072593	reactive oxygen species metabolic process	7	0.0236	ENSP00000283243,ENSP00000309714,ENSP00000340278,ENSP00000359000,ENSP00000392709,ENSP00000398736,ENSP00000419970	CYR61,GBF1,NDUFS1,PARK7,PLA2R1,POR,SH3PXD2B
GO.0022610	biological adhesion	22	0.0243	ENSP00000007722,ENSP00000230419,ENSP00000258341,ENSP00000261590,ENSP00000263645,ENSP00000263798,ENSP00000263895,ENSP00000268150,ENSP00000272233,ENSP00000293288,ENSP00000295550,ENSP00000331418,ENSP00000347979,ENSP00000353030,ENSP00000355180,ENSP00000356540,ENSP00000360882,ENSP00000361699,ENSP00000373783,ENSP00000377941,ENSP00000385899,ENSP00000418191	ACTN1,BAX,CD81,COL5A1,COL6A1,COL6A3,CTNNA2,CTPS1,DSG2,FAS,ITGA3,LAMC1,LOXL2,MFGE8,PTK7,PTPRF,PTPRM,RHOB,RND3,SDK1,STX11,TYRO3
GO.0048856	anatomical structure development	60	0.0268	ENSP00000205948,ENSP00000212355,ENSP00000216442,ENSP00000222308,ENSP00000230419,ENSP00000231061,ENSP00000232564,ENSP00000235521,ENSP00000251809,ENSP00000258341,ENSP00000258761,ENSP00000259818,ENSP00000261590,ENSP00000261622,ENSP00000261772,ENSP00000262768,ENSP00000265175,ENSP00000265371,ENSP00000268150,ENSP00000272233,ENSP00000280527,ENSP00000293288,ENSP00000295440,ENSP00000295550,ENSP00000300935…	AARS,ACSL4,ACTN1,AP2A1,APOA2,APOH,ATP11C,ATP6V1D,BAX,BZW2,COL6A1,COL6A3,CRIM1,CTHRC1,CTNNA2,CYR61,DSG2,EIF2S2,EPB41L3,EPN1,FAS,FKBP8,GC,GNB4,HMGN1,IMPDH1,ITGA6,JAGN1,KCNMA1,KIAA0196,LAMC1,LOXL2,MFGE8,NPPC,NRP1,PRMT1,PRNP,PTK7,PTPRF,PTPRM,RAB8A,RHOB,RLTPR,SDK1,SEC24B,SH3PXD2B,SLC7A5,SPAG1,SPARC,SPTAN1,SPTBN1,TF,TGFBR3,TIMP2,TMEM231,TUBB2B,TXNIP,TXNRD1,VLDLR,WARS2
GO.0046903	secretion	16	0.0283	ENSP00000231061,ENSP00000261735,ENSP00000263798,ENSP00000267843,ENSP00000300935,ENSP00000304565,ENSP00000305647,ENSP00000306106,ENSP00000334100,ENSP00000340698,ENSP00000346839,ENSP00000362711,ENSP00000377941,ENSP00000385806,ENSP00000385834,ENSP00000421725	ACTN1,ERP29,EXOC7,FGF7,FN1,GC,GIPC1,JAGN1,KCNMA1,RAB31,RAB8A,SPARC,TF,TXLNA,TYRO3,VAMP5
GO.0031581	hemidesmosome assembly	3	0.0294	ENSP00000258341,ENSP00000324101,ENSP00000386896	CD151,ITGA6,LAMC1
GO.0034329	cell junction assembly	8	0.0294	ENSP00000258341,ENSP00000282561,ENSP00000324101,ENSP00000341138,ENSP00000346839,ENSP00000347719,ENSP00000377941,ENSP00000386896	ACTN1,CD151,EPB41L3,FN1,GJA1,ITGA6,LAMC1,TBCD
GO.0006909	phagocytosis	8	0.0346	ENSP00000263798,ENSP00000268150,ENSP00000295927,ENSP00000306253,ENSP00000316338,ENSP00000331602,ENSP00000350941,ENSP00000354251	BAIAP2,ITPR1,MFGE8,NCKAP1,PRKCD,PTX3,SRC,TYRO3
GO.0032940	secretion by cell	14	0.035	ENSP00000231061,ENSP00000261735,ENSP00000263798,ENSP00000267843,ENSP00000300935,ENSP00000304565,ENSP00000305647,ENSP00000306106,ENSP00000334100,ENSP00000340698,ENSP00000346839,ENSP00000362711,ENSP00000377941,ENSP00000385834	ACTN1,ERP29,EXOC7,FGF7,FN1,GIPC1,JAGN1,RAB31,RAB8A,SPARC,TF,TXLNA,TYRO3,VAMP5
GO.0042493	response to drug	13	0.035	ENSP00000007722,ENSP00000233809,ENSP00000262768,ENSP00000293288,ENSP00000295440,ENSP00000331418,ENSP00000356969,ENSP00000358323,ENSP00000361699,ENSP00000368752,ENSP00000371532,ENSP00000382342,ENSP00000419970	ABCC1,APOA2,BAX,CTPS1,IGFBP2,ITGA3,NPPC,POR,PRNP,PTPRM,TIMP2,TXNIP,VLDLR
GO.0072358	cardiovascular system development	19	0.035	ENSP00000007722,ENSP00000212355,ENSP00000231061,ENSP00000235521,ENSP00000261590,ENSP00000265175,ENSP00000265371,ENSP00000268150,ENSP00000272233,ENSP00000282561,ENSP00000293288,ENSP00000309714,ENSP00000346839,ENSP00000354251,ENSP00000360882,ENSP00000371532,ENSP00000373783,ENSP00000377862,ENSP00000398736	BAX,COL5A1,CYR61,DSG2,FAT4,FN1,GJA1,ITGA3,LOXL2,MFGE8,NCKAP1,NRP1,RHOB,SEC24B,SH3PXD2B,SPARC,TGFBR3,VLDLR,WARS2
GO.0072359	circulatory system development	19	0.035	ENSP00000007722,ENSP00000212355,ENSP00000231061,ENSP00000235521,ENSP00000261590,ENSP00000265175,ENSP00000265371,ENSP00000268150,ENSP00000272233,ENSP00000282561,ENSP00000293288,ENSP00000309714,ENSP00000346839,ENSP00000354251,ENSP00000360882,ENSP00000371532,ENSP00000373783,ENSP00000377862,ENSP00000398736	BAX,COL5A1,CYR61,DSG2,FAT4,FN1,GJA1,ITGA3,LOXL2,MFGE8,NCKAP1,NRP1,RHOB,SEC24B,SH3PXD2B,SPARC,TGFBR3,VLDLR,WARS2
GO.0001937	negative regulation of endothelial cell proliferation	4	0.0352	ENSP00000205948,ENSP00000231061,ENSP00000282561,ENSP00000331418	APOH,GJA1,PTPRM,SPARC
GO.0030154	cell differentiation	48	0.0376	ENSP00000001008,ENSP00000212355,ENSP00000222308,ENSP00000230419,ENSP00000235521,ENSP00000258341,ENSP00000258761,ENSP00000259818,ENSP00000261183,ENSP00000261622,ENSP00000262768,ENSP00000265175,ENSP00000265371,ENSP00000269881,ENSP00000272233,ENSP00000282561,ENSP00000293288,ENSP00000295440,ENSP00000295550,ENSP00000300935,ENSP00000305647,ENSP00000306106,ENSP00000309714,ENSP00000318016,ENSP00000330523…	ACSL4,ACTN1,AP2A1,ATP11C,BAX,BZW2,CALR3,COL5A1,COL6A1,COL6A3,CTHRC1,CTNNA2,CYR61,EPB41L3,FAS,FKBP4,FKBP8,GJA1,IARS,JAGN1,KCNMA1,KIAA0196,LAMC1,LOXL2,NPPC,NRP1,OSBPL8,PRMT1,PRNP,PTK7,PTPRF,PTPRM,RAB8A,RHOB,SDK1,SEC24B,SH3PXD2B,SLC7A5,SPTAN1,SPTBN1,TF,TGFBR3,TIMP2,TUBB2B,TXNIP,VAMP5,VLDLR,WARS2
GO.0006868	glutamine transport	2	0.0379	ENSP00000234256,ENSP00000444408	SLC1A4,SLC1A5
GO.0048597	post-embryonic camera-type eye morphogenesis	2	0.0379	ENSP00000293288,ENSP00000370125	BAX,HMGN1
GO.0032459	regulation of protein oligomerization	4	0.0383	ENSP00000293288,ENSP00000347979,ENSP00000349016,ENSP00000350941	BAX,FAS,PEX14,SRC
GO.0046907	intracellular transport	26	0.0383	ENSP00000249269,ENSP00000261735,ENSP00000261942,ENSP00000262544,ENSP00000284320,ENSP00000293288,ENSP00000300935,ENSP00000303585,ENSP00000304565,ENSP00000305647,ENSP00000306003,ENSP00000306253,ENSP00000306788,ENSP00000309415,ENSP00000324628,ENSP00000334153,ENSP00000340698,ENSP00000345689,ENSP00000349016,ENSP00000349259,ENSP00000351926,ENSP00000356540,ENSP00000358323,ENSP00000359000,ENSP00000370808…	AP2A1,ARL6IP1,ATP5I,BAX,CLIP1,CLTB,ERP29,FAF2,GBF1,GIPC1,ITPR1,NAPG,PEX14,PMPCB,RAB31,RAB5C,RAB8A,RFTN1,SEC23B,SLC25A6,SPTBN1,STX11,TBC1D10B,TOMM70A,TXNIP,VAMP5
GO.0015748	organophosphate ester transport	6	0.039	ENSP00000282561,ENSP00000283558,ENSP00000332756,ENSP00000356969,ENSP00000360569,ENSP00000370808	APOA2,ATP11A,ATP11C,GJA1,SCP2,SLC25A6
GO.0050878	regulation of body fluid levels	17	0.0415	ENSP00000007722,ENSP00000205948,ENSP00000231061,ENSP00000260731,ENSP00000261622,ENSP00000263798,ENSP00000272233,ENSP00000282561,ENSP00000306253,ENSP00000331602,ENSP00000346839,ENSP00000350941,ENSP00000365807,ENSP00000377941,ENSP00000385834,ENSP00000386896,ENSP00000421725	ACTN1,APOH,FN1,GC,GJA1,GNA14,ITGA3,ITGA6,ITPR1,KIF11,PRKCD,RHOB,SLC7A5,SPARC,SRC,TF,TYRO3
GO.0032879	regulation of localization	38	0.0459	ENSP00000185150,ENSP00000205948,ENSP00000212355,ENSP00000231061,ENSP00000256366,ENSP00000261183,ENSP00000261590,ENSP00000261735,ENSP00000263645,ENSP00000265175,ENSP00000265371,ENSP00000267843,ENSP00000268150,ENSP00000282561,ENSP00000283243,ENSP00000295927,ENSP00000306253,ENSP00000331418,ENSP00000331602,ENSP00000334958,ENSP00000339787,ENSP00000345689,ENSP00000346839,ENSP00000349259,ENSP00000350941…	ACSL4,ACTN1,APOA2,APOH,CD81,CYR61,DNAJA1,DSG2,ERLEC1,ERP29,FGF7,FN1,G3BP2,GBF1,GJA1,ITPR1,KCNMA1,MFGE8,NCKAP1,NRP1,OSBPL8,PLA2R1,PRKCD,PRNP,PTPRM,PTX3,RAB5C,RLTPR,SCP2,SEC24B,SLC25A6,SPARC,SPTBN1,SRC,SYNJ2BP,TF,TGFBR3,UBQLN1
GO.0050678	regulation of epithelial cell proliferation	10	0.0475	ENSP00000205948,ENSP00000212355,ENSP00000231061,ENSP00000258341,ENSP00000265371,ENSP00000267843,ENSP00000282561,ENSP00000293288,ENSP00000331418,ENSP00000370125	APOH,BAX,FGF7,GJA1,HMGN1,LAMC1,NRP1,PTPRM,SPARC,TGFBR3
GO.0030036	actin cytoskeleton organization	12	0.0484	ENSP00000230419,ENSP00000263895,ENSP00000267843,ENSP00000316338,ENSP00000335655,ENSP00000341138,ENSP00000350941,ENSP00000354251,ENSP00000355124,ENSP00000355731,ENSP00000384312,ENSP00000385834	BAIAP2,CDC42BPA,EPB41L3,FGF7,FMNL3,KRT19,NCKAP1,PTK7,RND3,SRC,TF,TRIOBP
GO.0007155	cell adhesion	21	0.0488	ENSP00000007722,ENSP00000230419,ENSP00000258341,ENSP00000261590,ENSP00000263798,ENSP00000263895,ENSP00000268150,ENSP00000272233,ENSP00000293288,ENSP00000295550,ENSP00000331418,ENSP00000347979,ENSP00000353030,ENSP00000355180,ENSP00000356540,ENSP00000360882,ENSP00000361699,ENSP00000373783,ENSP00000377941,ENSP00000385899,ENSP00000418191	ACTN1,BAX,COL5A1,COL6A1,COL6A3,CTNNA2,CTPS1,DSG2,FAS,ITGA3,LAMC1,LOXL2,MFGE8,PTK7,PTPRF,PTPRM,RHOB,RND3,SDK1,STX11,TYRO3
GO.0048518	positive regulation of biological process	68	0.0488	ENSP00000052754,ENSP00000205948,ENSP00000212355,ENSP00000216297,ENSP00000216479,ENSP00000222308,ENSP00000230419,ENSP00000231061,ENSP00000233809,ENSP00000234256,ENSP00000256366,ENSP00000258341,ENSP00000261183,ENSP00000261636,ENSP00000261735,ENSP00000262768,ENSP00000262940,ENSP00000263645,ENSP00000265371,ENSP00000268150,ENSP00000272233,ENSP00000283243,ENSP00000293217,ENSP00000293288,ENSP00000295440…	ACOX1,ACSL4,ADIPOR1,AHSA1,AIFM2,APOA2,APOH,ARL1,ATP11C,BAX,CCNY,CD81,CLIP1,CTHRC1,CTNNA2,CYR61,DCN,DNAJA1,EEF1E1,ERP29,FKBP8,GBF1,GIPC1,HMGN1,IGFBP2,ITGA6,ITPR1,KCNMA1,LAMC1,LOXL2,MARCKSL1,MFGE8,NCKAP1,NPPC,NRP1,OSBPL8,PLA2R1,POR,PRKCD,PTK7,PTPRM,PTX3,RASA4,RFTN1,RHOB,RLTPR,SCP2,SH3PXD2B,SLC1A4,SLC25A6,SNX18,SPARC,SPTBN1,SRC,STAU1,SUPT16H,SYNJ2BP,TBC1D10B,TBCD,TF,TGFBR3,TIMP2,TRIOBP,TSPAN6,TXLNA,…
GO.0032462	regulation of protein homooligomerization	3	0.0497	ENSP00000347979,ENSP00000349016,ENSP00000350941	FAS,PEX14,SRC
GO.0060192	negative regulation of lipase activity	3	0.0497	ENSP00000283243,ENSP00000356969,ENSP00000419970	APOA2,PLA2R1,POR
GO.0007423	sensory organ development	14	0.0498	ENSP00000222308,ENSP00000230419,ENSP00000231061,ENSP00000265175,ENSP00000265371,ENSP00000293288,ENSP00000309714,ENSP00000330523,ENSP00000331418,ENSP00000345096,ENSP00000360882,ENSP00000370125,ENSP00000377862,ENSP00000385806	BAX,COL5A1,CTHRC1,FAT4,FKBP8,HMGN1,IMPDH1,KCNMA1,NRP1,PTK7,PTPRM,SEC24B,SH3PXD2B,SPARC
GO.0051704	multi-organism process	37	0.0498	ENSP00000001008,ENSP00000007722,ENSP00000052754,ENSP00000216297,ENSP00000216442,ENSP00000222308,ENSP00000231061,ENSP00000233809,ENSP00000251809,ENSP00000261590,ENSP00000263645,ENSP00000263798,ENSP00000268150,ENSP00000269881,ENSP00000293217,ENSP00000293288,ENSP00000295927,ENSP00000306106,ENSP00000316338,ENSP00000318016,ENSP00000331602,ENSP00000339787,ENSP00000340278,ENSP00000346103,ENSP00000350941…	ACOX1,ACSL4,AP2A1,APOA2,ATP6V1D,BAIAP2,BAX,CALR3,CD81,DCN,DNAJA1,DSG2,EIF2S2,EPN1,FKBP4,FKBP8,GBF1,GC,GPX4,IGFBP2,ITGA3,JAGN1,KIAA0196,KRT19,MFGE8,NCKAP1,PARK7,PRKCD,PTX3,SLC1A5,SLC25A6,SPAG1,SPARC,SRC,SUPT16H,TYRO3,VLDLR

## Sheet: Molecular function
Pathway ID	Pathway description	observed gene count	false discovery rate	matching proteins (IDs)	matching proteins (labels)
GO.0005515	protein binding	81	3.69e-05	ENSP00000001008,ENSP00000007722,ENSP00000163416,ENSP00000185150,ENSP00000205948,ENSP00000212355,ENSP00000216479,ENSP00000219473,ENSP00000221418,ENSP00000222308,ENSP00000231061,ENSP00000232564,ENSP00000233809,ENSP00000259253,ENSP00000260731,ENSP00000261427,ENSP00000261590,ENSP00000261636,ENSP00000261735,ENSP00000261942,ENSP00000262768,ENSP00000263645,ENSP00000263798,ENSP00000265371,ENSP00000267843…	ACOX1,ACTN1,ADIPOR1,AHSA1,AP2A1,APOA2,APOH,ARL1,BAIAP2,BAX,CD151,CD81,CDC42BPA,CLIP1,CLTB,COL5A1,COL6A1,CRIM1,CYR61,DNAJA1,DSG2,ECH1,ERLEC1,ERP29,FAF2,FAS,FGF7,FKBP4,FKBP8,FMNL3,FN1,G3BP2,GC,GIPC1,GNA14,GNB4,GNG5,GOLGA5,IARS,IGFBP2,ITGA3,KCNMA1,KIF11,LOXL2,LRPAP1,NAPG,NCKAP1,NPPC,NRP1,PARK7,PEX14,PLA2R1,PPP6R3,PRKCD,PRMT1,PRNP,PTPRM,PTX3,RAB8A,SCP2,SH3PXD2B,SPARC,SPTAN1,SPTBN1,SRC,STX11,STXBP1,TB…
GO.0043168	anion binding	56	4.57e-05	ENSP00000001008,ENSP00000166534,ENSP00000205948,ENSP00000212355,ENSP00000216780,ENSP00000216962,ENSP00000230419,ENSP00000235521,ENSP00000251809,ENSP00000259818,ENSP00000260731,ENSP00000261427,ENSP00000261636,ENSP00000261772,ENSP00000262027,ENSP00000263383,ENSP00000263798,ENSP00000263895,ENSP00000265371,ENSP00000267843,ENSP00000268150,ENSP00000283558,ENSP00000298223,ENSP00000300935,ENSP00000304565…	AARS,ABCC1,ACSL4,AIFM2,APOA2,APOH,ARL1,ASNA1,ATAD3A,ATP11A,ATP11C,ATP13A4,CDC42BPA,COL5A1,CTPS1,CYR61,DNAJA1,FGF7,FKBP4,FN1,FOLR2,GBF1,GNA14,IARS,ILVBL,ITPR1,KIF11,LRPAP1,MARS,MFGE8,NDUFV1,NRP1,P4HA2,PCK2,POR,PRKCD,PSAT1,PTK7,PTPRF,PYGB,RAB31,RAB5C,RAB8A,RND3,SCP2,SNX18,SPAG1,SPTBN1,SRC,SUCLG1,TGFBR3,TUBB2B,TXNRD1,TYRO3,UBE2K,WARS2
GO.0097367	carbohydrate derivative binding	48	0.000201	ENSP00000001008,ENSP00000007722,ENSP00000052754,ENSP00000185150,ENSP00000205948,ENSP00000212355,ENSP00000216780,ENSP00000230419,ENSP00000235521,ENSP00000251809,ENSP00000258341,ENSP00000259818,ENSP00000260731,ENSP00000261427,ENSP00000261636,ENSP00000261772,ENSP00000262027,ENSP00000263798,ENSP00000263895,ENSP00000265371,ENSP00000267843,ENSP00000268150,ENSP00000283558,ENSP00000300935,ENSP00000304565…	AARS,ABCC1,ACSL4,APOH,ARL1,ASNA1,ATAD3A,ATP11A,ATP11C,ATP13A4,CDC42BPA,COL5A1,CTPS1,CYR61,DCN,DNAJA1,ERLEC1,FGF7,FKBP4,FN1,GNA14,IARS,ITGA3,KIF11,LAMC1,LRPAP1,MARS,MFGE8,NDUFV1,NRP1,PCK2,POR,PRKCD,PTK7,PTPRF,RAB31,RAB5C,RAB8A,RND3,SPAG1,SRC,SUCLG1,TGFBR3,TUBB2B,TYRO3,UBE2K,VLDLR,WARS2
GO.0005488	binding	134	0.00135	ENSP00000007722,ENSP00000163416,ENSP00000166534,ENSP00000185150,ENSP00000205948,ENSP00000212355,ENSP00000216190,ENSP00000216297,ENSP00000216479,ENSP00000216780,ENSP00000217426,ENSP00000219473,ENSP00000221418,ENSP00000222308,ENSP00000225665,ENSP00000226355,ENSP00000229319,ENSP00000230419,ENSP00000232219,ENSP00000232564,ENSP00000233809,ENSP00000235521,ENSP00000249269,ENSP00000251809,ENSP00000256545…	AARS,ABCC1,ACSL4,ADIPOR1,AFM,AGL,AHCY,AHSA1,AIFM2,AP2A1,APOA2,APOH,ARL1,ASNA1,ATAD3A,ATP11A,ATP11C,ATP13A4,BAIAP2,BAX,CALR3,CCDC124,CD151,CD81,CDC42BPA,COL5A1,COL6A1,CRIM1,CTPS1,CYBRD1,DNAJA1,DSG2,ECH1,EIF1AX,EIF2S2,EIF3D,EMC7,EPN1,ERLEC1,ERP29,FAF2,FAM120A,FAS,FAT4,FGF7,FKBP8,FMNL3,FN1,FOLR2,GBF1,GC,GDE1,GIPC1,GNA14,GNB4,GNG5,GOLGA5,H1FX,IARS,IGFBP2,ILVBL,IMPDH1,ITGA3,ITGA6,ITPR1,KCNMA1,KIF11,LA…
GO.0036094	small molecule binding	50	0.00254	ENSP00000001008,ENSP00000166534,ENSP00000216780,ENSP00000217426,ENSP00000226355,ENSP00000229319,ENSP00000230419,ENSP00000232219,ENSP00000235521,ENSP00000251809,ENSP00000259818,ENSP00000260731,ENSP00000261183,ENSP00000261427,ENSP00000261636,ENSP00000261772,ENSP00000262027,ENSP00000263383,ENSP00000263798,ENSP00000263895,ENSP00000268150,ENSP00000283558,ENSP00000298223,ENSP00000300935,ENSP00000304565…	AARS,ABCC1,ACSL4,AFM,AHCY,AIFM2,APOA2,ARL1,ASNA1,ATAD3A,ATP11A,ATP11C,ATP13A4,CDC42BPA,CTPS1,DNAJA1,FKBP4,FOLR2,G3BP2,GC,GNA14,HNRNPF,IARS,ILVBL,IMPDH1,KIF11,LDHB,MARS,MFGE8,NDUFV1,OSBPL8,P4HA2,PCK2,POR,PRKCD,PTK7,RAB31,RAB5C,RAB8A,RBP1,RND3,SCP2,SPAG1,SRC,SUCLG1,TUBB2B,TXNRD1,TYRO3,UBE2K,WARS2
GO.0005215	transporter activity	28	0.00391	ENSP00000216442,ENSP00000225665,ENSP00000232219,ENSP00000234256,ENSP00000246891,ENSP00000261622,ENSP00000265175,ENSP00000282561,ENSP00000283558,ENSP00000284320,ENSP00000293288,ENSP00000298223,ENSP00000306253,ENSP00000313740,ENSP00000332756,ENSP00000349887,ENSP00000351926,ENSP00000352655,ENSP00000356969,ENSP00000360569,ENSP00000370808,ENSP00000371532,ENSP00000381634,ENSP00000382342,ENSP00000385806…	ABCC1,AP2A1,APOA2,ASNA1,ATP11A,ATP11C,ATP6V1D,BAX,CSN1S1,FOLR2,GC,GJA1,ITPR1,KCNMA1,RBP1,SCP2,SEC24B,SLC1A4,SLC1A5,SLC25A11,SLC25A6,SLC38A1,SLC38A5,SLC39A10,SLC7A5,TF,TOMM70A,VLDLR
GO.0015175	neutral amino acid transmembrane transporter activity	5	0.0043	ENSP00000234256,ENSP00000261622,ENSP00000313740,ENSP00000381634,ENSP00000444408	SLC1A4,SLC1A5,SLC38A1,SLC38A5,SLC7A5
GO.1901681	sulfur compound binding	11	0.0043	ENSP00000205948,ENSP00000212355,ENSP00000263383,ENSP00000265371,ENSP00000267843,ENSP00000346839,ENSP00000353030,ENSP00000360569,ENSP00000360882,ENSP00000398736,ENSP00000421922	APOH,COL5A1,CYR61,FGF7,FN1,ILVBL,LRPAP1,NRP1,PTPRF,SCP2,TGFBR3
GO.0008201	heparin binding	9	0.00973	ENSP00000205948,ENSP00000212355,ENSP00000265371,ENSP00000267843,ENSP00000346839,ENSP00000353030,ENSP00000360882,ENSP00000398736,ENSP00000421922	APOH,COL5A1,CYR61,FGF7,FN1,LRPAP1,NRP1,PTPRF,TGFBR3
GO.0005539	glycosaminoglycan binding	10	0.0135	ENSP00000052754,ENSP00000205948,ENSP00000212355,ENSP00000265371,ENSP00000267843,ENSP00000346839,ENSP00000353030,ENSP00000360882,ENSP00000398736,ENSP00000421922	APOH,COL5A1,CYR61,DCN,FGF7,FN1,LRPAP1,NRP1,PTPRF,TGFBR3
GO.0050839	cell adhesion molecule binding	8	0.023	ENSP00000261590,ENSP00000324101,ENSP00000331418,ENSP00000346839,ENSP00000350941,ENSP00000360882,ENSP00000377941,ENSP00000398736	ACTN1,CD151,COL5A1,CYR61,DSG2,FN1,PTPRM,SRC
GO.0048037	cofactor binding	11	0.0262	ENSP00000216962,ENSP00000217426,ENSP00000229319,ENSP00000263383,ENSP00000312370,ENSP00000322450,ENSP00000360569,ENSP00000365773,ENSP00000377446,ENSP00000419970,ENSP00000434516	AHCY,AIFM2,ILVBL,LDHB,NDUFV1,POR,PSAT1,PYGB,SCP2,SUCLG1,TXNRD1
GO.0032403	protein complex binding	16	0.035	ENSP00000231061,ENSP00000232564,ENSP00000260731,ENSP00000263645,ENSP00000303585,ENSP00000324101,ENSP00000346839,ENSP00000349016,ENSP00000350941,ENSP00000354251,ENSP00000360882,ENSP00000365807,ENSP00000368752,ENSP00000377941,ENSP00000384312,ENSP00000398736	ACTN1,CD151,CD81,CLIP1,COL5A1,CYR61,FN1,GNA14,GNB4,KIF11,NCKAP1,PEX14,PRNP,SPARC,SRC,TRIOBP
GO.0005178	integrin binding	6	0.0368	ENSP00000324101,ENSP00000346839,ENSP00000350941,ENSP00000360882,ENSP00000377941,ENSP00000398736	ACTN1,CD151,COL5A1,CYR61,FN1,SRC
GO.0019003	GDP binding	5	0.0403	ENSP00000272233,ENSP00000300935,ENSP00000304565,ENSP00000345689,ENSP00000377446	RAB31,RAB5C,RAB8A,RHOB,SUCLG1
GO.0019842	vitamin binding	6	0.0403	ENSP00000166534,ENSP00000226355,ENSP00000232219,ENSP00000263383,ENSP00000298223,ENSP00000421725	AFM,FOLR2,GC,ILVBL,P4HA2,RBP1
GO.0043167	ion binding	84	0.0492	ENSP00000001008,ENSP00000007722,ENSP00000166534,ENSP00000205948,ENSP00000212355,ENSP00000216780,ENSP00000216962,ENSP00000222308,ENSP00000230419,ENSP00000231061,ENSP00000235521,ENSP00000249269,ENSP00000251809,ENSP00000259818,ENSP00000260731,ENSP00000261386,ENSP00000261427,ENSP00000261590,ENSP00000261636,ENSP00000261772,ENSP00000262027,ENSP00000262544,ENSP00000262768,ENSP00000262940,ENSP00000263383…	AARS,ABCC1,ACSL4,ACTN1,ADIPOR1,AIFM2,APOA2,APOH,ARL1,ASNA1,ATAD3A,ATP11A,ATP11C,ATP13A4,CALR3,CDC42BPA,CLIP1,COL5A1,CTPS1,CYBRD1,CYR61,DNAJA1,DSG2,EIF2S2,FAT4,FGF7,FKBP4,FKBP8,FN1,FOLR2,GBF1,GDE1,GNA14,IARS,ILVBL,IMPDH1,ITGA3,ITGA6,ITPR1,KCNMA1,KIF11,LOXL2,LRPAP1,MARCH3,MARS,MFGE8,NDUFS1,NDUFV1,NRP1,P4HA2,PARK7,PCK2,PMPCB,POR,PRKCD,PRNP,PSAT1,PTK7,PTPRF,PYGB,RAB31,RAB5C,RAB8A,RASA4,RND3,SCP2,SEC2…
